# Supplementary material for: Genetic Dissection of Mature Root Characteristics by Genome-Wide Association Studies in Rapeseed (Brassica napus L.)
Source: MDPI journal article supplement (doi:10.3390/plants10122569), 2021-11-24
Supplement: s1 [file s1]

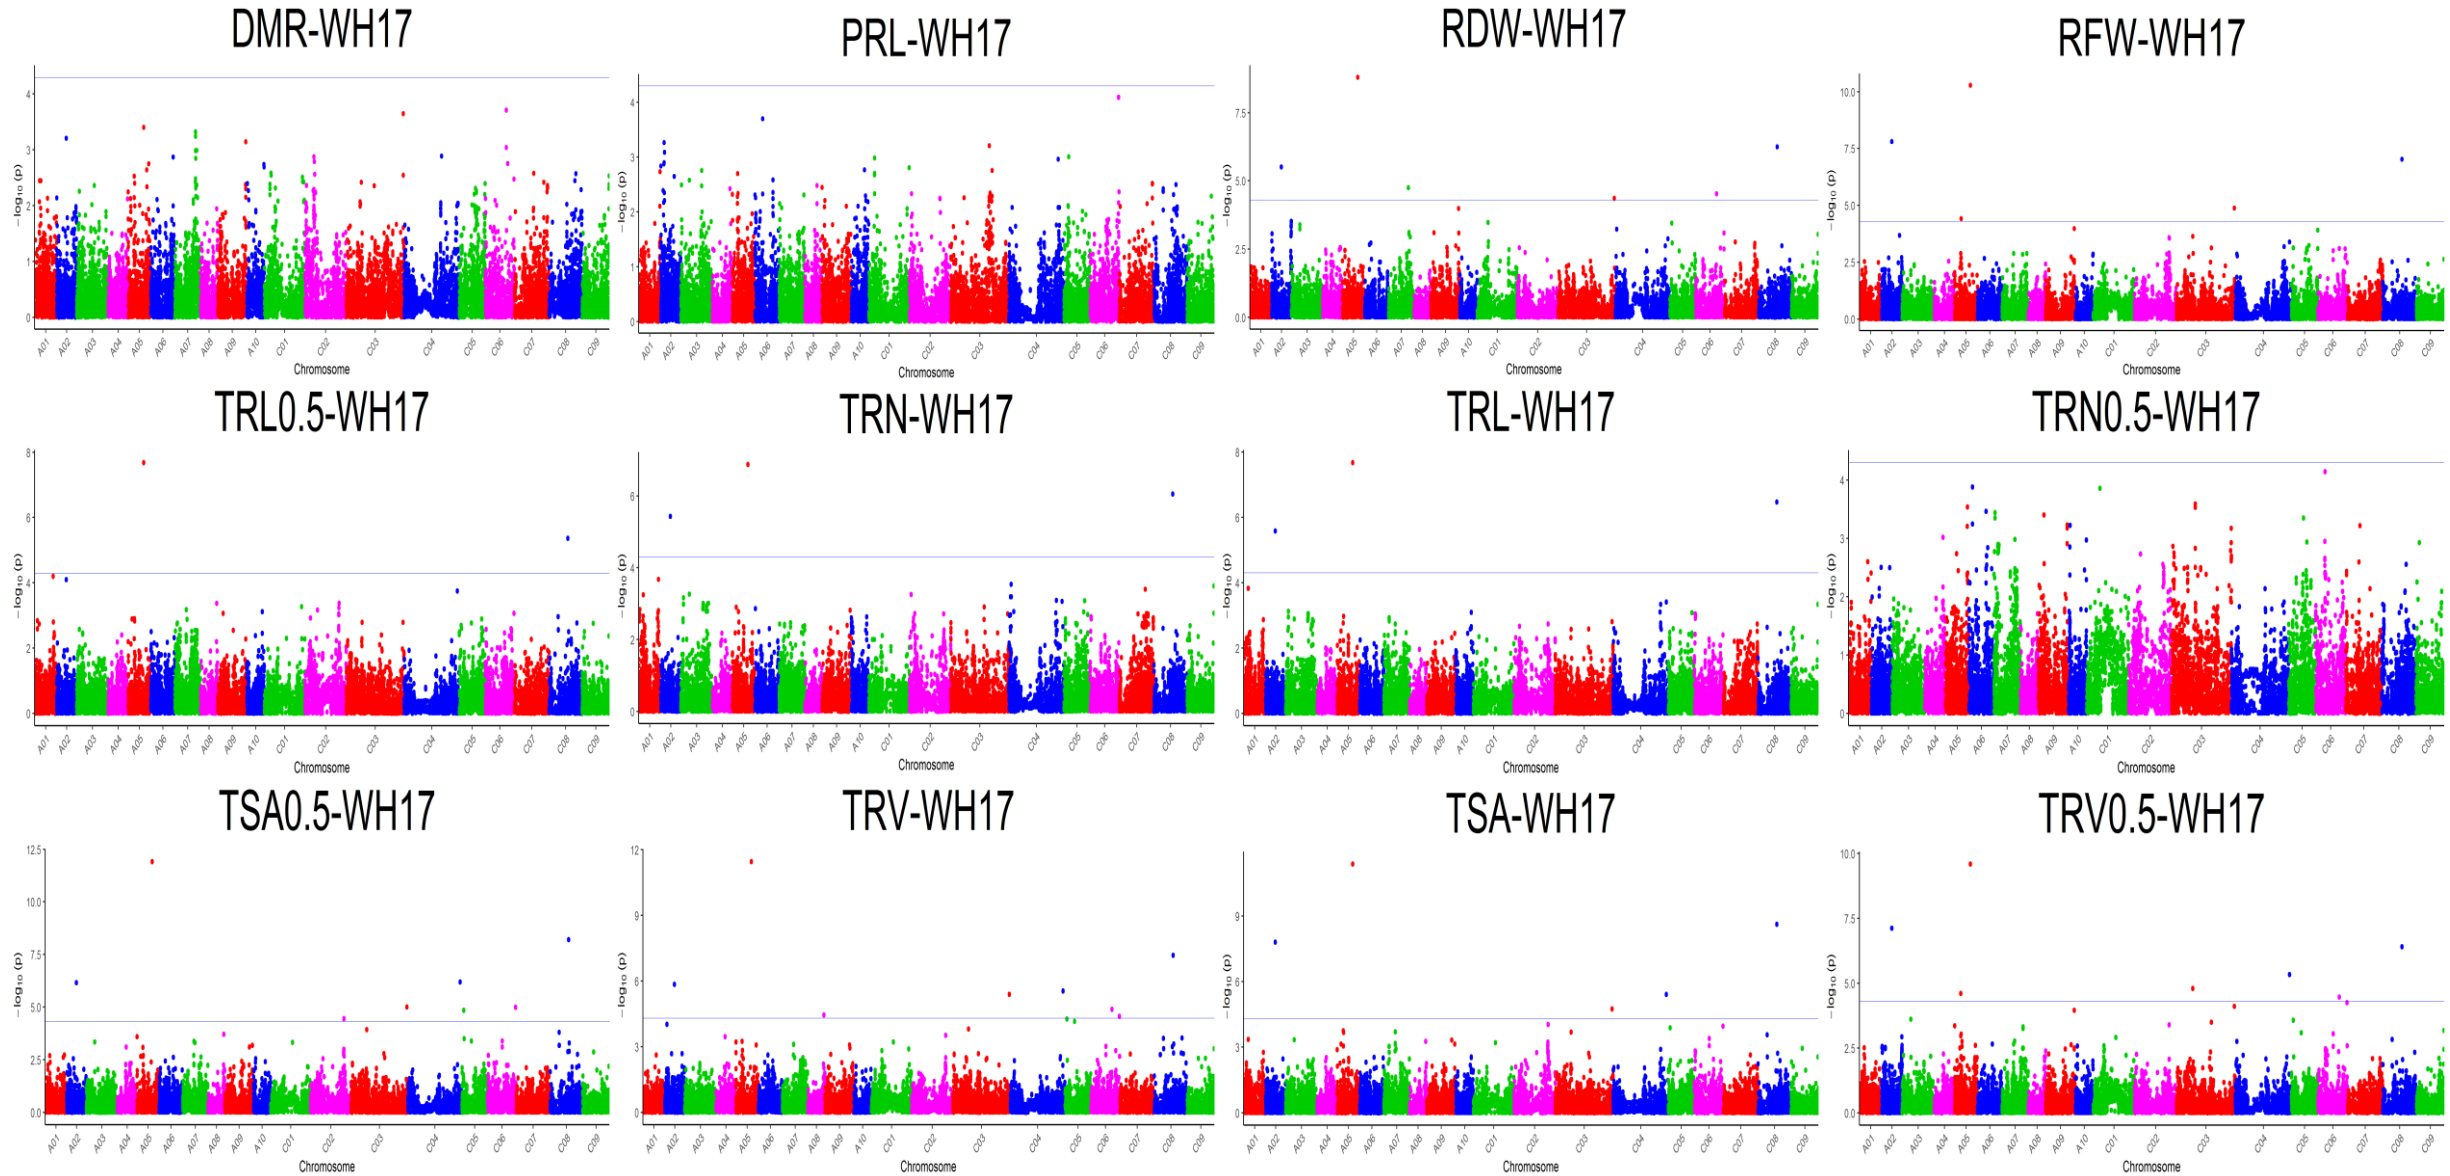

**Figure S7A.** Manhattan of phenotype-genotype association analysis for twelve root-related traits of *B. napus* by MLM in WH17. The different colors in the plots indicate the 19 chromosomes from A01 to C09; the thick horizontal lines represent the threshold values ( $-\log_{10}1/20,131 = 4.30E-5$ ). The colors dots above the threshold values indicate the significant SNPs

RFW-WH19

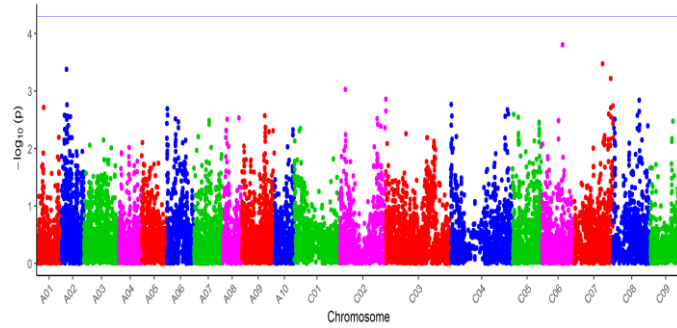

DMR-WH19

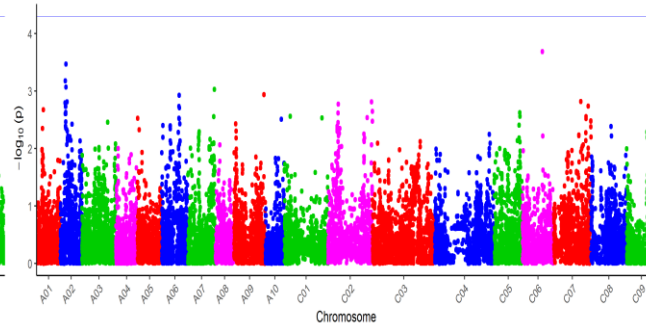

TRL0.5-WH19

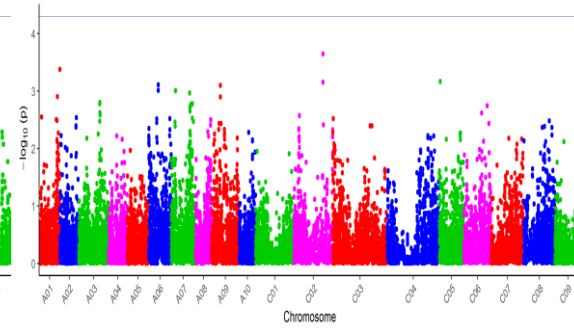

PRL-WH19

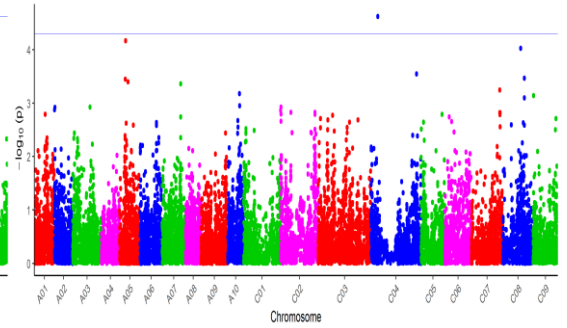

TRN-WH19

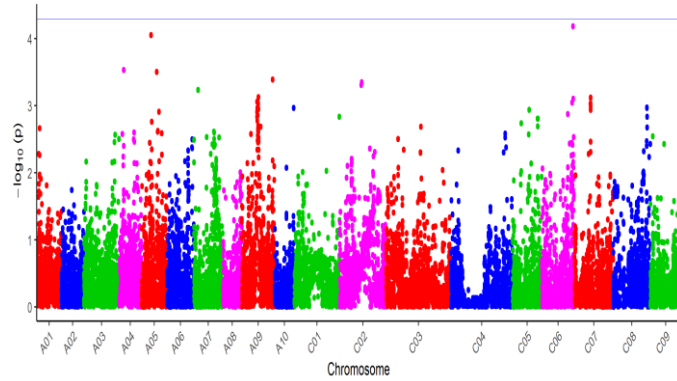

TRL-WH19

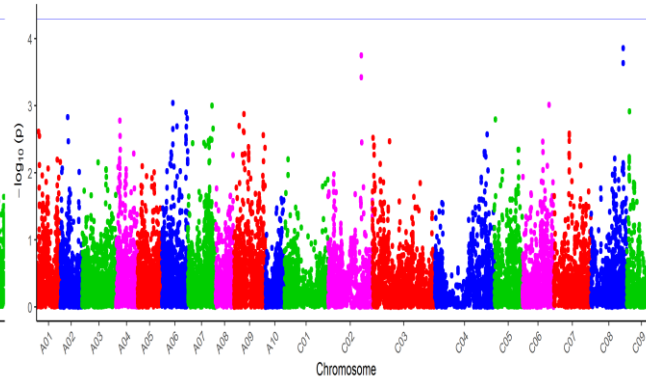

TRV0.5-WH19

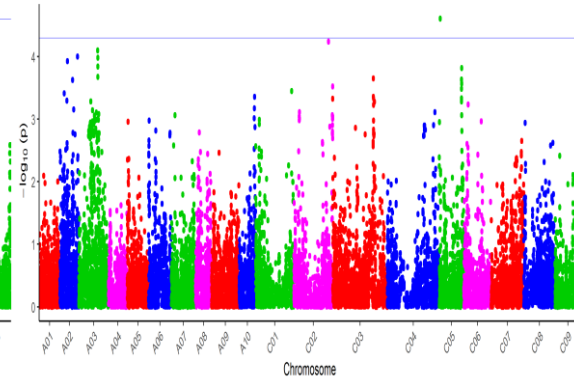

TRN0.5-WH19

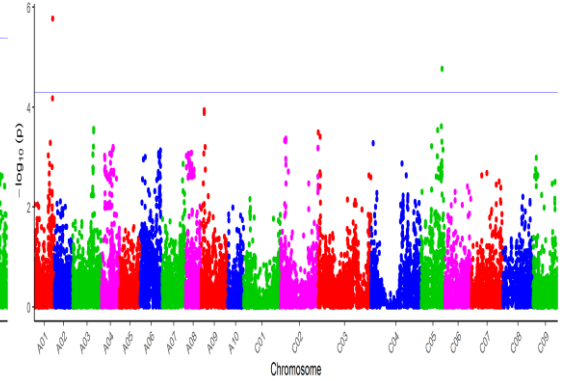

TSA0.5-WH19

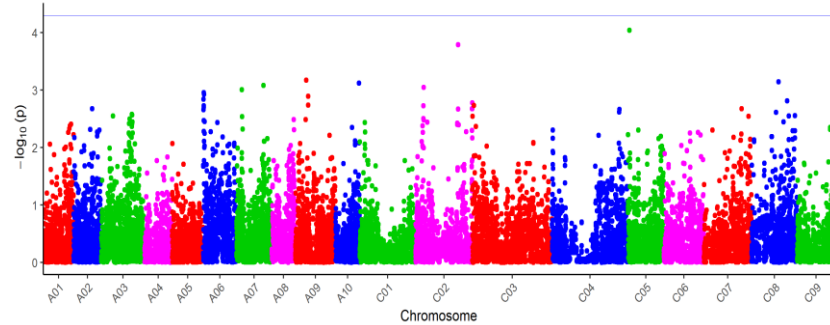

TRV-WH19

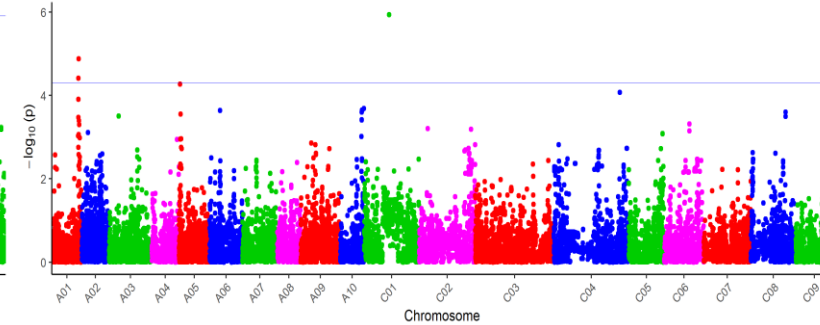

TSA-WH19

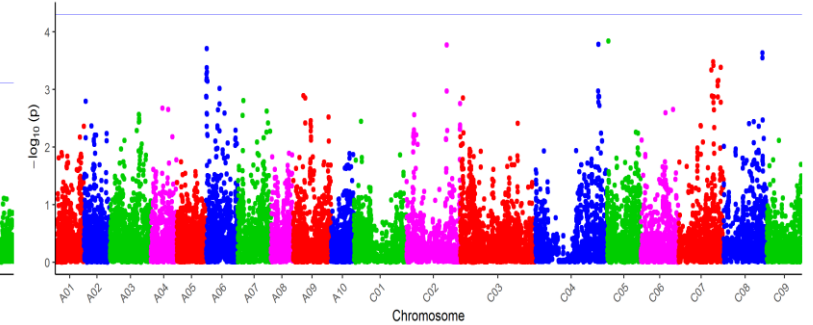

**Figure S7B.** Manhattan of phenotype-genotype association analysis for twelve root-related traits of *B. napus* by MLM in WH19. The different colors in the plots indicate the 19 chromosomes from A01 to C09; the thick horizontal lines represent the threshold values ( $-\log_{10}1/20,131 = 4.30E-5$ ). The colors dots above the threshold values indicate the significant SNPs

RFW-WH20

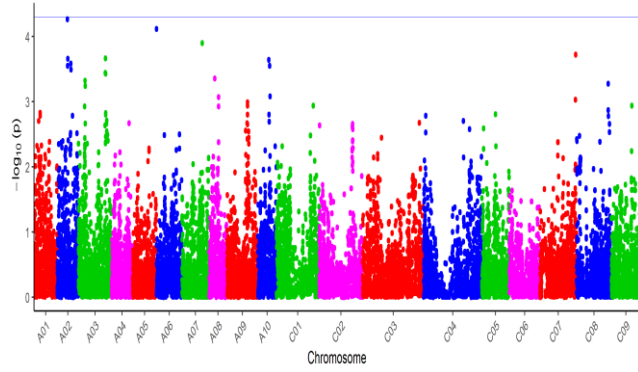

PRL-WH20

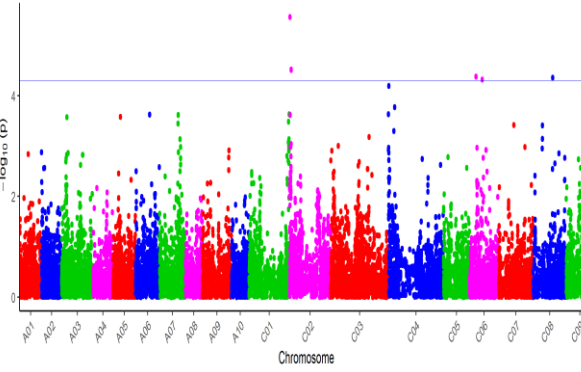

DMR-WH20

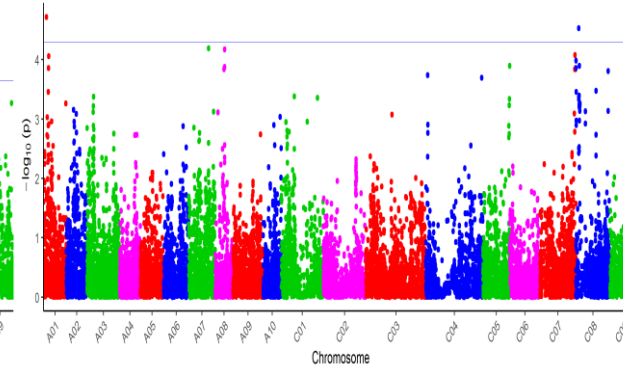

TRL0.5-WH20

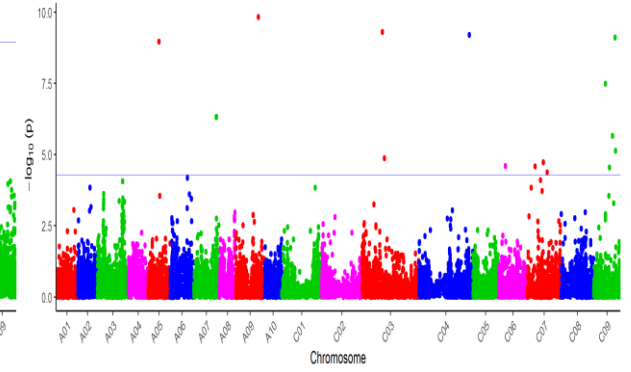

TRN-WH20

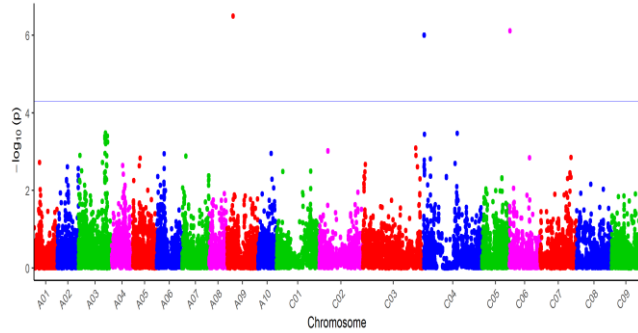

TRN0.5-WH20

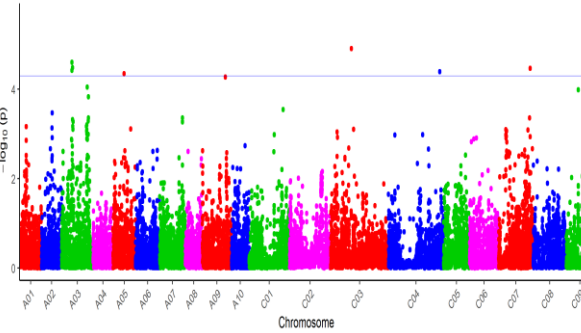

TRL-WH20

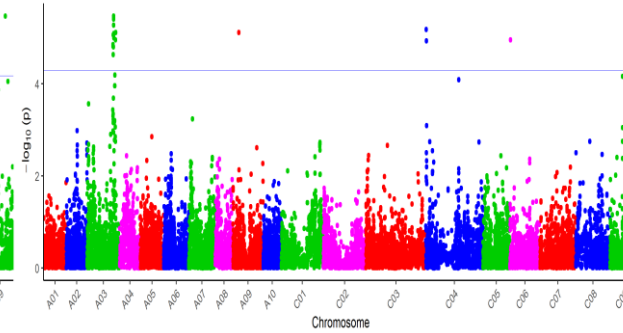

TRV0.5-WH20

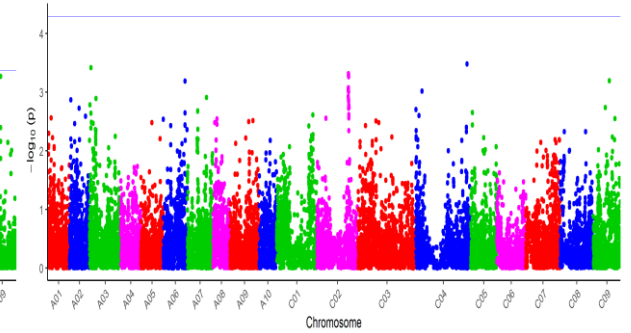

TSA0.5-WH20

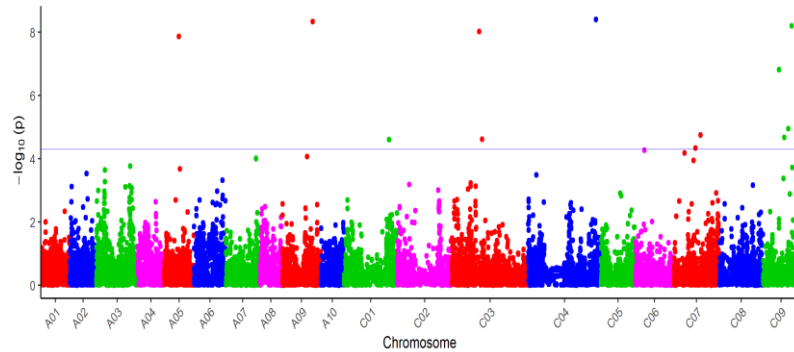

TSA-WH20

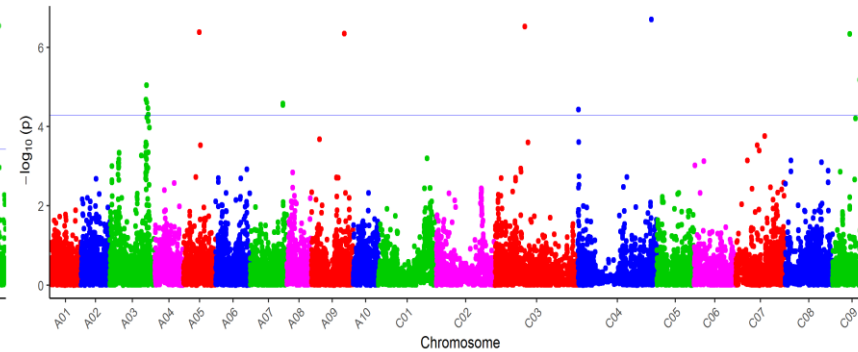

TRV-WH20

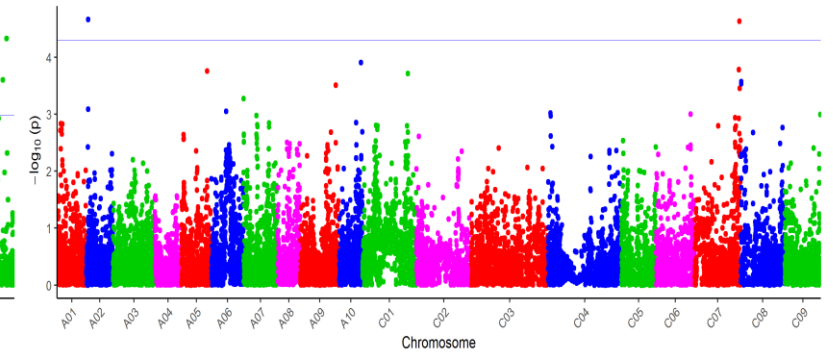

**Figure S7C.** Manhattan of phenotype-genotype association analysis for twelve root-related traits of *B. napus* by MLM in WH20. The different colors in the plots indicate the 19 chromosomes from A01 to C09; the thick horizontal lines represent the threshold values ( $-\log_{10}1/20,131 = 4.30E-5$ ). The colors dots above the threshold values indicate the significant SNPs



RDW-BLUE

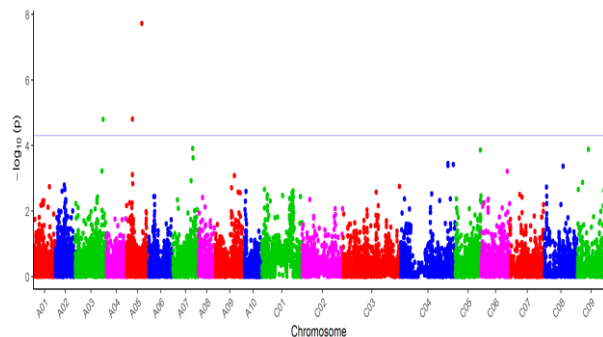

PRL-BLUE

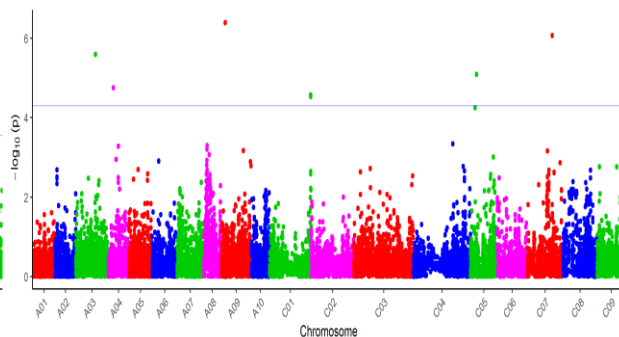

DMR-BLUE

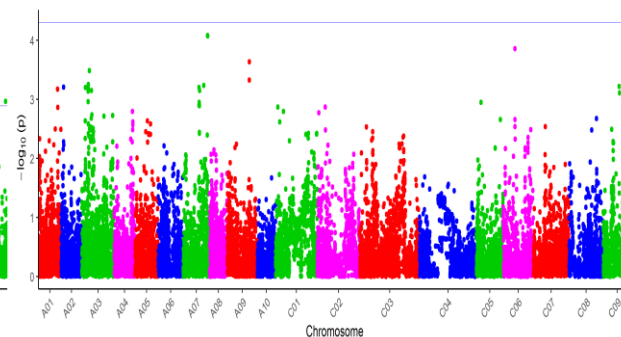

RFW-BLUE

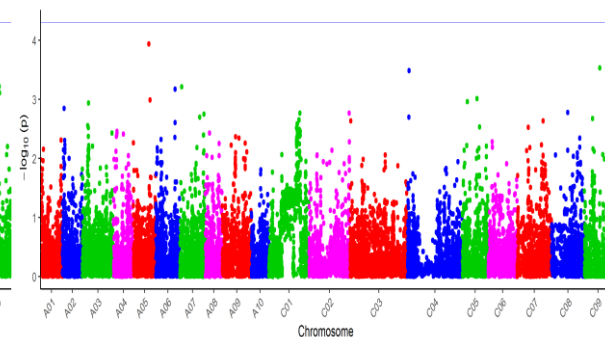

TRL0.5-BLUE

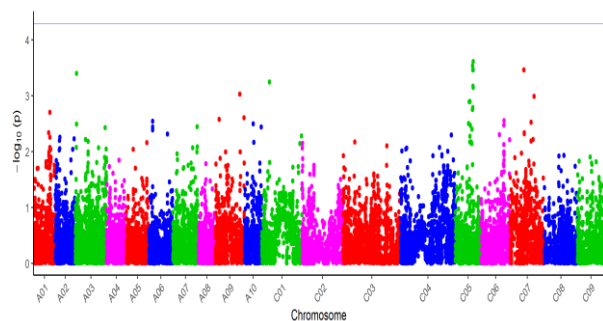

TRN-BLUE

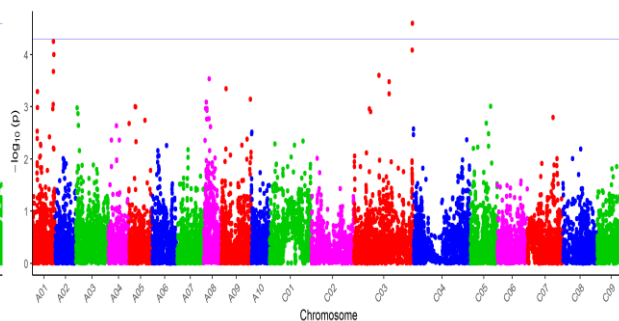

TRL-BLUE

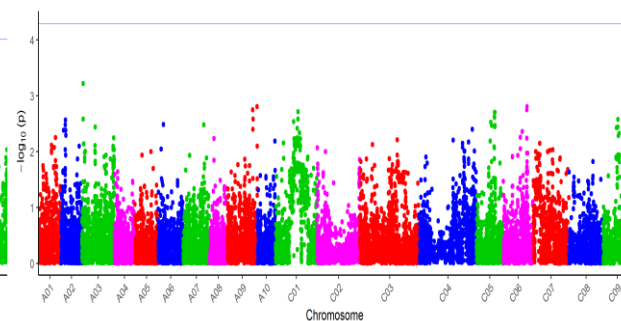

TRN0.5-BLUE

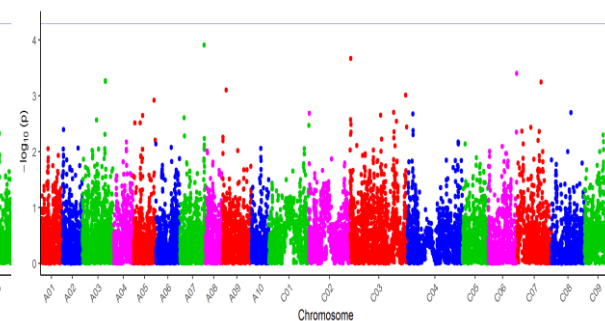

TSA0.5-BLUE

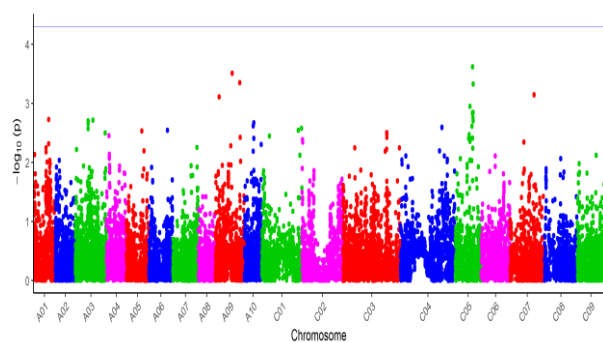

TRV-BLUE

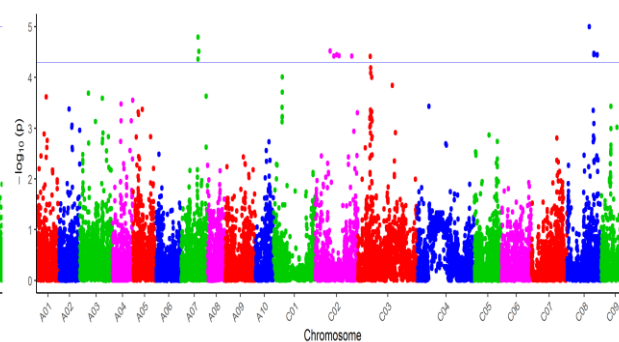

TSA-BLUE

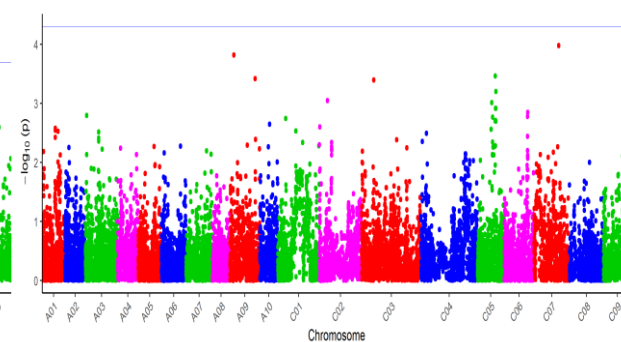

TRV0.5-BLUE

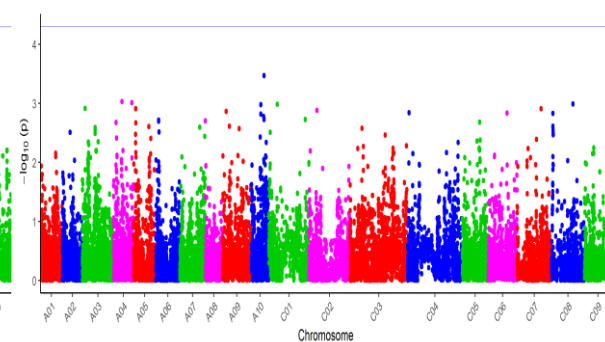

**Figure S7D.** Manhattan of phenotype-genotype association analysis for twelve root-related traits of *B. napus* by MLM using BLUEs. The different colors in the plots indicate the 19 chromosomes from A01 to C09; the thick horizontal lines represent the threshold values ( $-\log_{10}1/20,131 = 4.30E-5$ ). The colors dots above the threshold values indicate the significant SNPs
