# Supplementary material for: Genetic Dissection of Mature Root Characteristics by Genome-Wide Association Studies in Rapeseed (Brassica napus L.)
Source: MDPI journal article supplement (doi:10.3390/plants10122569), 2021-11-24
Supplement: s1 [file s1]

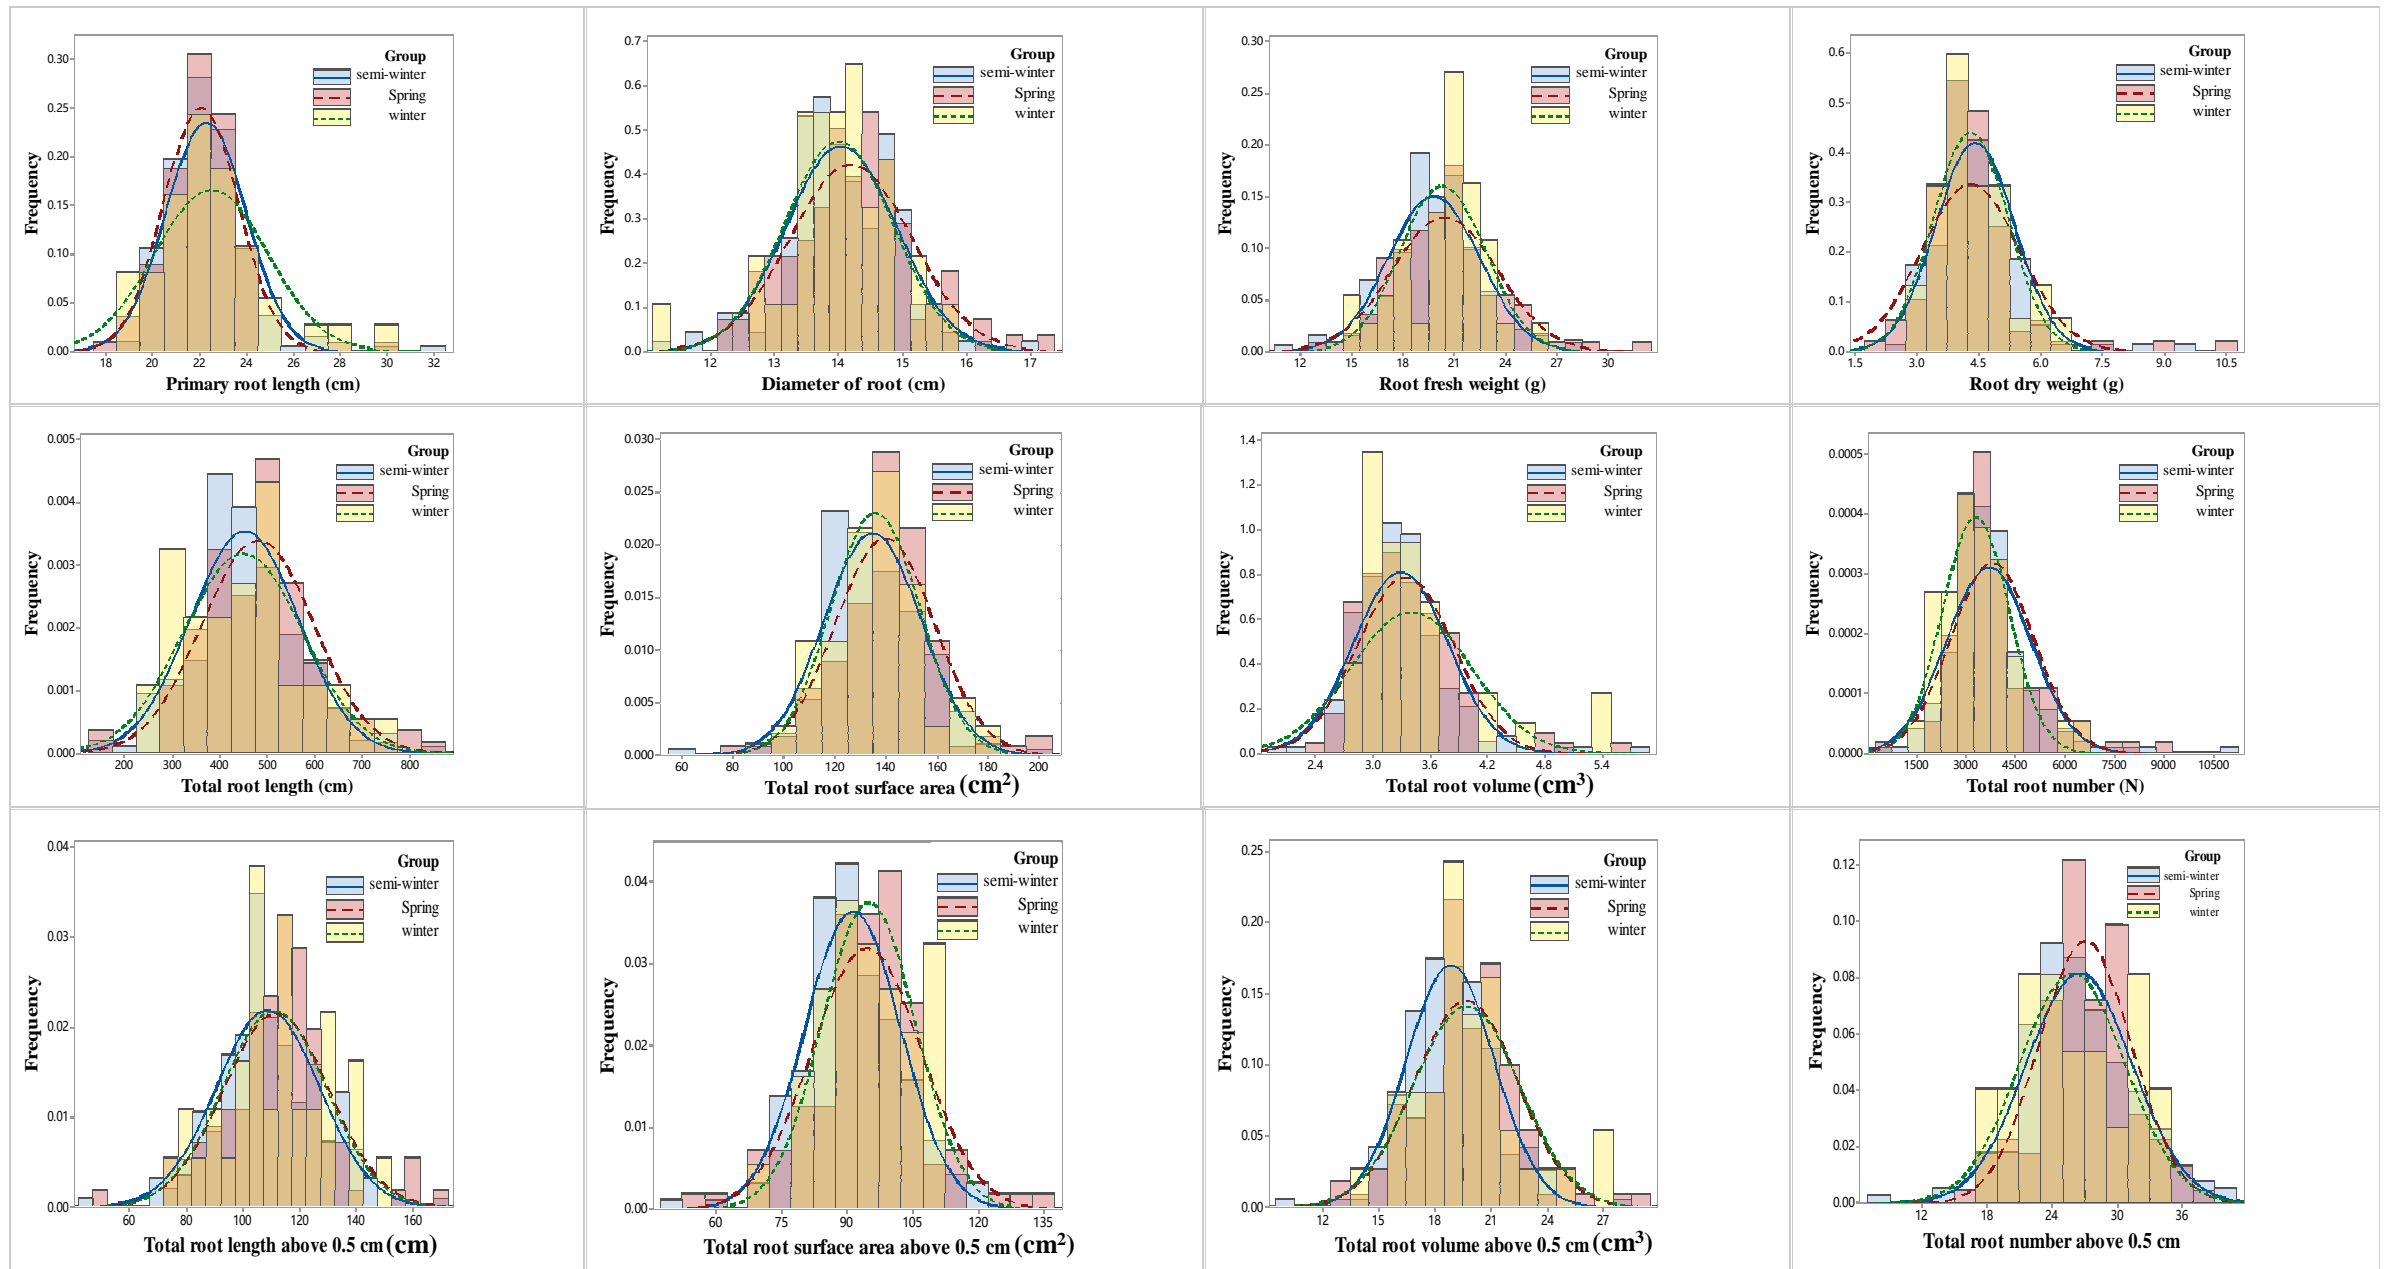

**Figure S8.** The diversity collection of *Brassica napus* revealed distribution in three subpopulations: winter rapeseed, spring rapeseed, and semi-winter rapeseed. The subpopulations are represented by the three colors of the bars.
