# Supplementary material for: Genetic Dissection of Mature Root Characteristics by Genome-Wide Association Studies in Rapeseed (Brassica napus L.)
Source: MDPI journal article supplement (doi:10.3390/plants10122569), 2021-11-24
Supplement: s1 [file s1]

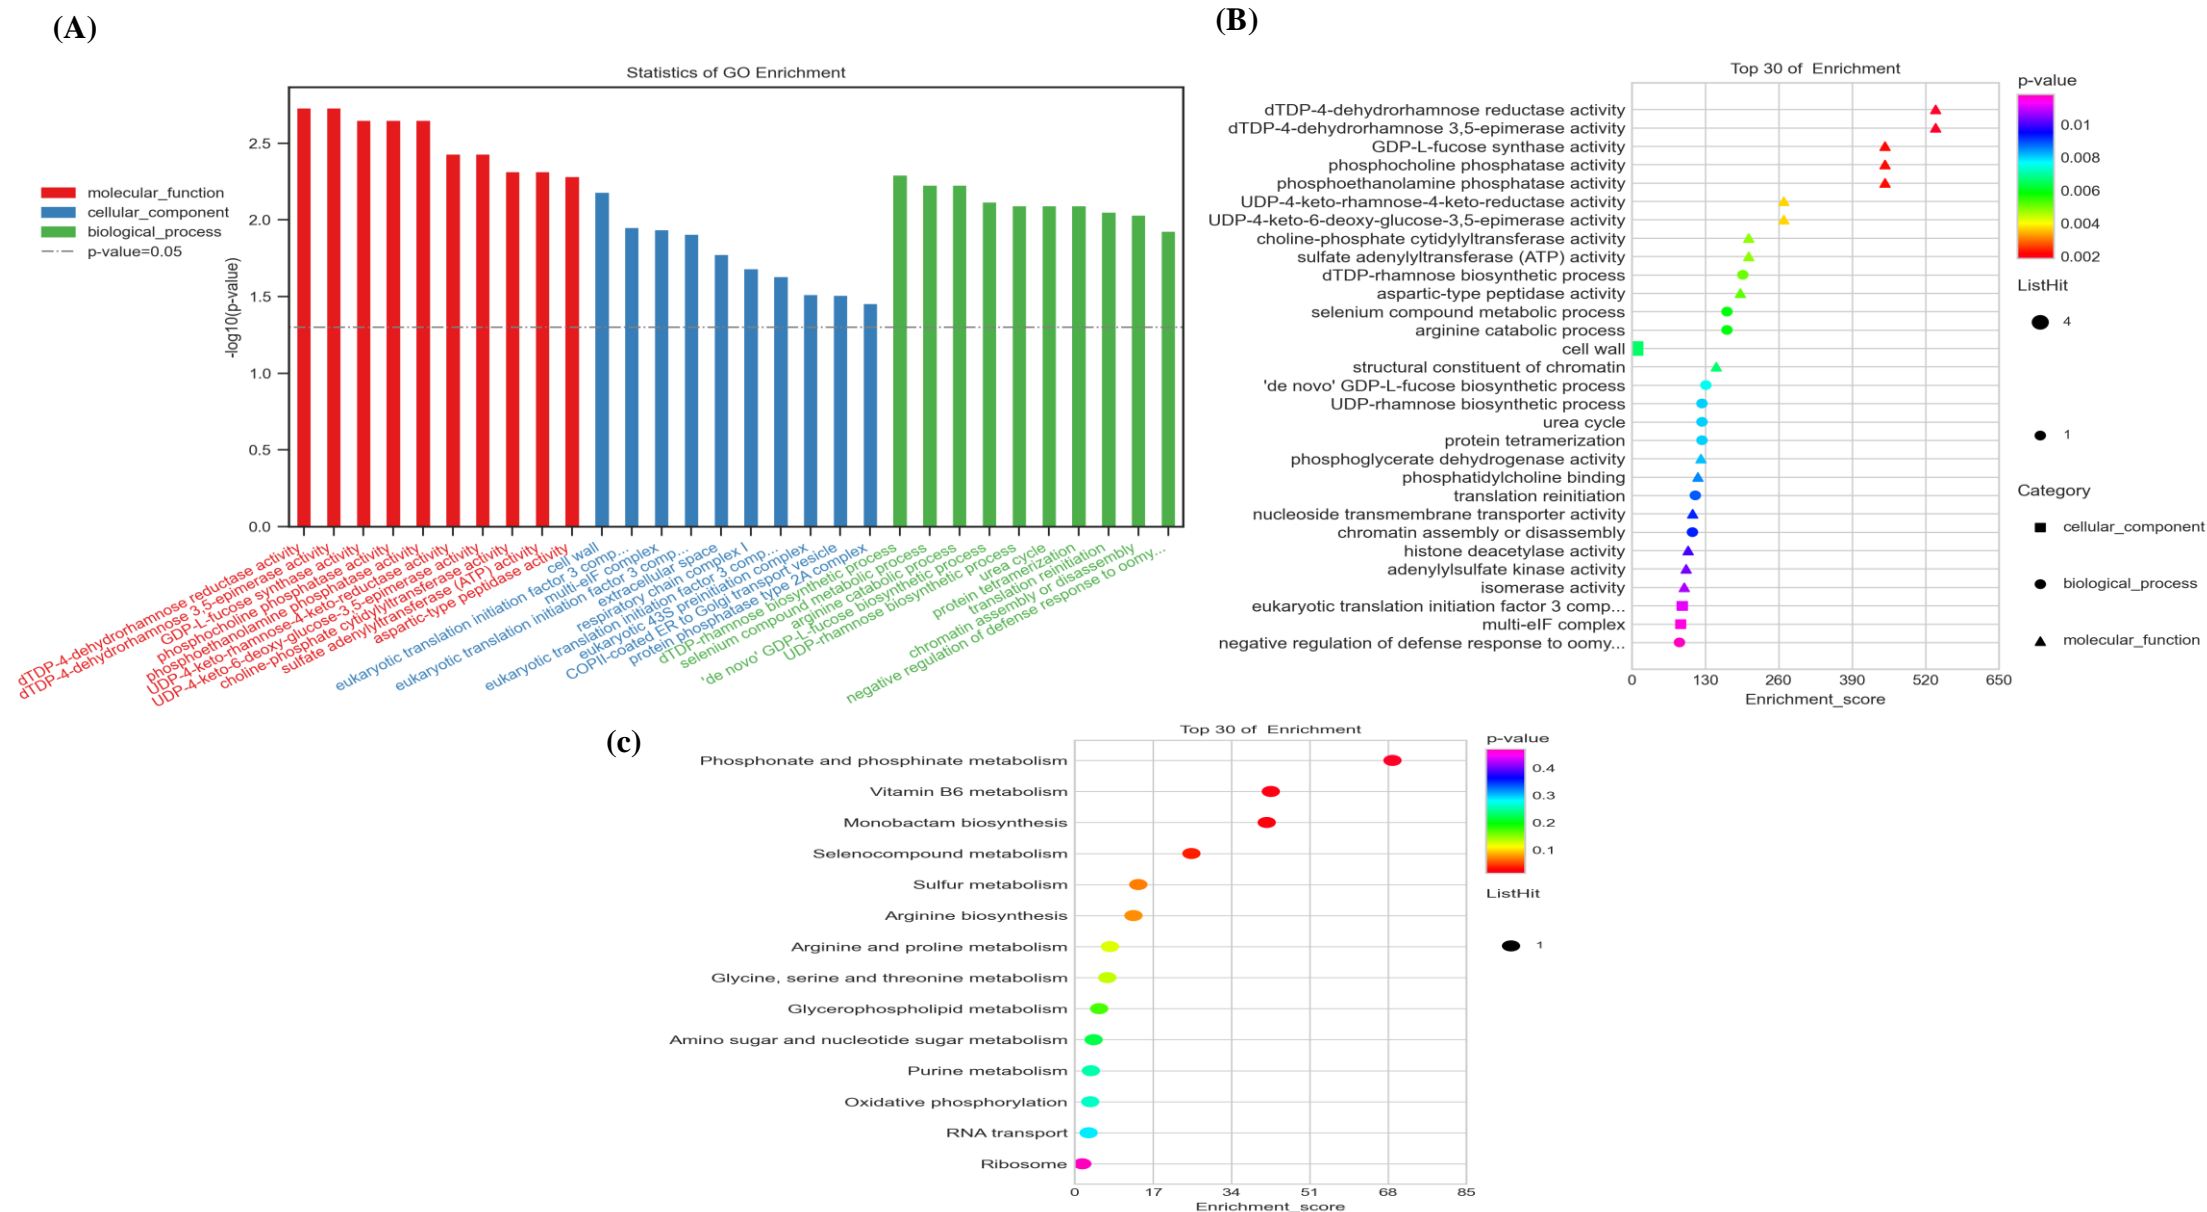

**Figure S6.** Functional annotation of the detected candidates genes. (A) GO classification of the genes (B) GO analysis of the top 30 genes (C) KEGG analysis of the top 30 genes
