# Supplementary material for: Genetic Dissection of Mature Root Characteristics by Genome-Wide Association Studies in Rapeseed (Brassica napus L.)
Source: Plants (Basel). 2021 Nov 24;10(12):2569. doi: 10.3390/plants10122569 (PMC8705616; doi:10.3390/plants10122569)
Supplement: Supplementary file 1 [file plants-10-02569-s001.zip]

Archive with 5 entries (5 files):
- supplementary file 1.xlsx
- Supplementary file 2.pdf
- Supplementary file 3.pdf
- Supplementary file 4.pdf
- Supplementary file 5.pdf
