# Supplementary material for: Genetic Dissection of Mature Root Characteristics by Genome-Wide Association Studies in Rapeseed (Brassica napus L.)
Source: Plants (Basel). 2021 Nov 24;10(12):2569. doi: 10.3390/plants10122569 (PMC8705616; doi:10.3390/plants10122569)
Supplement: Supplementary file 1 [file plants-10-02569-s001.zip › supplementary file 1.xlsx]

## Sheet: Table S1
Table S1: Summary of significant SNPs associated with root-related traits in B. napus detected in WH17, WH19, WH20 and BLUE
Trait	Marker	Chr.	Position (bp)	−log10(P)	PVE (%)
TRN0.5-WH19	seq-new-rs27069	A01	19833111	5.77464	10.838
TRV-WH19	Bn-A01-p23477194	A01	19350103	4.87857	7.713
TRV-WH19	seq-new-rs37683	A01	19300987	4.41014	6.955
DMR-WH20	seq-new-rs27852	A01	2206409	4.72013	7.048
RFW-WH17	Bn-A02-p11772983	A02	8480672	7.81	11.85
TSA-WH17	Bn-A02-p11772983	A02	8480672	7.80344	12.931
TRV0.5-WH17	Bn-A02-p11772983	A02	8480672	7.11598	11.75
TSA0.5-WH17	Bn-A02-p11772983	A02	8480672	6.16357	10.147
TRV-WH17	Bn-A02-p11772983	A02	8480672	5.84179	9.712
TRL-WH17	Bn-A02-p11772983	A02	8480672	5.58125	9.04
RDW-WH17	Bn-A02-p11772983	A02	8480672	5.50864	8.097
TRN-WH17	Bn-A02-p11772983	A02	8480672	5.43208	8.808
TRV	seq-new-rs29214	A02	1395709	4.66462	7.214
TRL-WH20	Bn-A03-p24971360	A03	23385744	5.47287	7.892
TRL-WH20	seq-new-rs23998	A03	23376597	5.44194	7.8
TRL-WH20	seq-new-rs48318	A03	23261331	5.40772	7.749
TRL-WH20	seq-new-rs47298	A03	23335474	5.27465	7.553
TRL-WH20	Bn-A03-p27289437	A03	25525008	5.11375	7.315
TRL-WH20	Bn-A03-p25009736	A03	23409540	5.09433	7.284
TRL-WH20	Bn-A03-p25024749	A03	23417240	5.07594	8.02
TRL-WH20	Bn-A03-p24612593	A03	23112618	5.06439	7.24
TRL-WH20	Bn-A03-p24971360	A03	23385744	5.04731	7.294
TRL-WH20	Bn-A03-p24986472	A03	23400579	4.9943	7.136
TRL-WH20	seq-new-rs37425	A03	25464206	4.95413	7.15
TRL-WH20	seq-new-rs45370	A03	22850108	4.85205	7.757
TRL-WH20	Bn-A03-p24363260	A03	22900381	4.81625	6.873
TRL-WH20	seq-new-rs23058	A03	23075585	4.81622	6.873
TRL-WH20	Bn-A03-p24690789	A03	23157661	4.80156	8.153
TRL-WH20	seq-new-rs43951	A03	23031664	4.6815	6.69
TRL-WH20	seq-new-rs43951	A03	23031664	4.63476	6.605
TRL-WH20	Bn-A03-p25024749	A03	23417240	4.61005	7.316
TRN0.5-WH20	Bn-A03-p9869156	A03	9085530	4.59832	6.574
TRN0.5-WH20	Bn-A03-p10680539	A03	9833573	4.48411	6.405
TSA-WH20	Bn-A03-p26001258	A03	24364511	4.46622	6.375
TRN0.5-WH20	Bn-A03-p9873327	A03	9088253	4.41731	6.309
TSA-WH20	Bn-A03-p26275444	A03	24663592	4.30733	7.068
PRL-BLUE	seq-new-rs27655	A03	17259288	5.5976	8.952
RDW-BLUE	Bn-A03-p27582705	A03	25899467	4.79882	9.306
PRL-BLUE	Bn-A06-p5276150	A04	3861966	4.75004	6.776
TSA0.5-WH17	seq-new-rs37128	A05	16647352	11.912	20.312
TRV-WH17	seq-new-rs37128	A05	16647352	11.458	19.488
TSA-WH17	seq-new-rs37128	A05	16647352	11.3711	19.286
RFW-WH17	seq-new-rs37128	A05	16647352	10.2845	15.525
TRV0.5-WH17	seq-new-rs37128	A05	16647352	9.59862	16.12
RDW-WH17	seq-new-rs37128	A05	16647352	8.80129	13.186
TRL0.5-WH17	seq-new-rs37128	A05	16647352	7.68141	12.633
TRL-WH17	seq-new-rs37128	A05	16647352	7.67189	12.578
TRN-WH17	seq-new-rs37128	A05	16647352	6.87985	11.215
TRV0.5-WH17	Bn-A05-p6415983	A05	5964030	4.59817	6.141
RFW-WH17	Bn-A05-p6984362	A05	6411956	4.40935	5.782
TRL0.5-WH20	Bn-A05-p15113541	A05	11594569	8.97212	13.317
TSA0.5-WH20	Bn-A05-p15113541	A05	11594569	7.86707	11.629
TSA-WH20	Bn-A05-p15113541	A05	11594569	6.38078	9.327
TRN0.5-WH20	Bn-A05-p15113541	A05	11594569	4.34216	6.26
RDW-BLUE	Bn-A05-p6415983	A05	5964030	4.80947	7.129
RDW-BLUE	seq-new-rs37128	A05	16647352	7.7263	14.109
RDW-WH17	A07_17622569	A07	17622569	4.75141	6.884
TRL0.5-WH20	MS1-930	A07	20269364	6.32548	9.528
TRL0.5-WH20	seq-new-rs45707	A07	20319584	6.31949	9.139
TRL0.5-WH20	MS1-755	A07	20269186	6.31653	9.137
TSA-WH20	MS1-930	A07	20269364	4.58195	6.798
TSA-WH20	seq-new-rs45707	A07	20319584	4.55211	6.499
TSA-WH20	MS1-755	A07	20269186	4.55	6.497
TRV-BLUE	Bn-A07-p12751218	A07	14839056	4.79046	7.4
TRV-BLUE	Bn-A07-p13167740	A07	15251664	4.51589	6.406
TRV-BLUE	seq-new-rs27660	A07	14779457	4.3614	6.727
TRV-WH17	MS5-12	A08	17703594	4.43934	7.172
TRL0.5-WH20	seq-new-rs48456	A09	26867775	9.83251	14.727
TSA0.5-WH20	seq-new-rs48456	A09	26867775	8.33957	12.438
TRN-WH20	seq-new-rs41374	A09	7034148	6.49469	10.438
TSA-WH20	seq-new-rs48456	A09	26867775	6.35214	9.313
TRL0.5-WH20	seq-new-rs41374	A09	7034148	5.11304	8.351
PRL-BLUE	seq-new-rs41996	A09	4405703	6.39723	9.993
TRV-WH19	seq-new-rs27871	C01	20455252	5.93506	9.435
TSA0.5-WH20	seq-new-rs27998	C01	29993826	4.60005	6.939
PRL-BLUE	Bn-scaff_19168_1-p26783	C01	36009106	4.53407	6.64
PRL-BLUE	Bn-scaff_19168_1-p29925	C01	36006379	4.57448	6.682
PRL-BLUE	Bn-scaff_19168_1-p30868	C01	36006085	4.57448	6.682
PRL-BLUE	Bn-scaff_19168_1-p6595	C01	36020331	4.57448	6.682
PRL-BLUE	Bn-scaff_19168_1-p9913	C01	36017084	4.57448	6.682
TSA0.5-WH17	seq-new-rs25271	C02	39555521	4.43893	7.379
PRL-WH20	seq-new-rs26767	C02	2403139	5.55801	8.941
PRL-WH20	seq-new-rs23033	C02	6443933	4.51272	7.322
PRL-WH20	Bn-scaff_16269_1-p173948	C02	6444911	4.50841	7.153
TRV-BLUE	Bn-scaff_17831_1-p219290	C02	40289347	4.42232	6.886
TRV-BLUE	Bn-scaff_18245_1-p56750	C02	30189229	4.42838	6.44
TRV-BLUE	Bn-scaff_18507_1-p861253	C02	26520246	4.41863	6.436
TRV-BLUE	Bn-scaff_18507_1-p88102	C02	23984504	4.52234	6.834
TRV-BLUE	Bn-scaff_23401_1-p78385	C02	27359504	4.45045	6.474
TRV-WH17	Bn-scaff_16755_1-p927921	C03	59713737	5.38348	9.855
TSA0.5-WH17	Bn-scaff_16755_1-p927921	C03	59713737	5.00682	9.003
RFW-WH17	Bn-scaff_16755_1-p927921	C03	59713737	4.8769	8.034
TRV0.5-WH17	seq-new-rs30480	C03	14270416	4.80077	6.458
TSA-WH17	Bn-scaff_16755_1-p927921	C03	59713737	4.73912	8.438
RDW-WH17	Bn-scaff_16755_1-p927921	C03	59713737	4.36097	7.267
TRL0.5-WH20	Bn-scaff_15782_1-p111218	C03	16702113	9.30909	13.806
TSA0.5-WH20	Bn-scaff_15782_1-p111218	C03	16702113	8.02331	11.869
TSA-WH20	Bn-scaff_15782_1-p111218	C03	16702113	6.52645	9.567
TRN0.5-WH20	Bn-scaff_15782_1-p111218	C03	16702113	4.9083	7.087
TRL0.5-WH20	seq-new-rs35820	C03	17780902	4.87267	7.049
TSA0.5-WH20	seq-new-rs35820	C03	17780902	4.61377	6.718
TRN-BLUE	Bn-scaff_16755_1-p927921	C03	59713737	4.59872	7.168
TRV-BLUE	Bn-scaff_21312_1-p169902	C03	10156037	4.41146	5.516
TSA0.5-WH17	Bn-scaff_20270_1-p620404	C04	46737401	6.19214	10.252
TRV-WH17	Bn-scaff_20270_1-p620404	C04	46737401	5.54792	9.203
TSA-WH17	Bn-scaff_20270_1-p620404	C04	46737401	5.40339	8.916
TRV0.5-WH17	Bn-scaff_20270_1-p620404	C04	46737401	5.329	8.795
PRL-WH19	seq-new-rs41006	C04	10942552	4.6254	7.409
TRL0.5-WH20	Bn-scaff_16888_1-p45860	C04	44839791	9.20135	13.949
TSA0.5-WH20	Bn-scaff_16888_1-p45860	C04	44839791	8.40578	12.679
TSA-WH20	Bn-scaff_16888_1-p45860	C04	44839791	6.70801	10.054
TRN-WH20	seq-new-rs35666	C04	378326	6.00421	8.62
TRN-WH20	seq-new-rs25364	C04	399920	5.99831	8.611
TRL-WH20	seq-new-rs35666	C04	378326	5.17965	7.422
TRL-WH20	seq-new-rs25364	C04	399920	4.9317	7.054
TSA-WH20	seq-new-rs35666	C04	378326	4.43023	6.349
TRN0.5-WH20	Bn-scaff_16888_1-p45860	C04	44839791	4.3912	6.459
TSA0.5-WH17	seq-new-rs23993	C05	1701393	4.83761	7.782
TRN0.5-WH19	Bn-scaff_21369_1-p406725	C05	38540135	4.76988	7.865
TRV0.5-WH19	Bn-scaff_16414_1-p884592	C05	1070282	4.60794	6.054
PRL-BLUE	seq-new-rs43343	C05	7922294	5.09113	7.281
TSA0.5-WH17	Bn-scaff_17799_1-p717821	C06	35895670	4.99	7.163
TRV-WH17	seq-new-rs46355	C06	24689070	4.70004	8.132
RDW-WH17	seq-new-rs46355	C06	24689070	4.52145	7.194
TRV0.5-WH17	seq-new-rs46355	C06	24689070	4.46165	7.544
TRV-WH17	Bn-scaff_17799_1-p717821	C06	35895670	4.38598	6.698
TRN-WH20	seq-new-rs42652	C06	755904	6.10911	9.229
TRL-WH20	seq-new-rs42652	C06	755904	4.95739	7.464
TRL0.5-WH20	Bn-scaff_17917_1-p117089	C06	7880978	4.59762	6.886
PRL-WH20	Bn-scaff_16002_1-p2421049	C06	7120761	4.37243	6.294
PRL-WH20	seq-new-rs35479	C06	14927349	4.31347	6.157
TSA0.5-WH20	seq-new-rs29209	C07	29979020	4.7497	6.845
TRL0.5-WH20	Bn-scaff_15754_1-p240930	C07	26701510	4.72471	6.907
TRV-WH20	Bn-scaff_16110_1-p1193197	C07	43751429	4.63504	6.566
TRL0.5-WH20	seq-new-rs28794	C07	11291488	4.57863	6.683
TRN0.5-WH20	Bn-scaff_16110_1-p3584024	C07	41329996	4.46688	7.044
TRL0.5-WH20	seq-new-rs29209	C07	29979020	4.36975	6.252
TSA0.5-WH20	Bn-scaff_15754_1-p240930	C07	26701510	4.33839	6.338
PRL-BLUE	seq-new-rs46512	C07	35123112	6.07403	8.773
TSA-WH17	C08_21120661	C08	21120661	8.61699	14.239
TSA0.5-WH17	C08_21120661	C08	21120661	8.1954	13.499
TRV-WH17	C08_21120661	C08	21120661	7.16844	11.68
RFW-WH17	C08_21120661	C08	21120661	7.0223	10.309
TRL-WH17	C08_21120661	C08	21120661	6.46619	10.483
TRV0.5-WH17	C08_21120661	C08	21120661	6.40945	10.404
RDW-WH17	C08_21120661	C08	21120661	6.25214	9.144
TRN-WH17	C08_21120661	C08	21120661	6.05824	9.785
TRL0.5-WH17	C08_21120661	C08	21120661	5.3635	8.644
DMR-WH20	Bn-scaff_21003_1-p655588	C08	3860004	4.52865	6.507
PRL-WH20	seq-new-rs39808	C08	22313636	4.35012	6.285
TRV-BLUE	Bn-scaff_16197_1-p3021917	C08	31266583	4.46423	6.329
TRV-BLUE	Bn-scaff_16197_1-p3022518	C08	31265979	4.46423	6.329
TRV-BLUE	Bn-scaff_16197_1-p3155696	C08	31158825	4.44698	6.304
TRV-BLUE	Bn-scaff_16197_1-p3259829	C08	31008745	4.44732	6.305
TRV-BLUE	Bn-scaff_16197_1-p841813	C08	33253583	4.44745	6.326
TRV-BLUE	Bn-scaff_16197_1-p843705	C08	33251705	4.44382	6.3
TRV-BLUE	seq-new-rs32035	C08	25800859	5.00151	7.178
TRV-BLUE	seq-new-rs39416	C08	31033439	4.47291	6.455
TRL0.5-WH20	Bn-scaff_17799_1-p2987946	C09	39625508	9.10626	13.659
TSA0.5-WH20	Bn-scaff_17799_1-p2987946	C09	39625508	8.20259	12.395
TRL0.5-WH20	seq-new-rs36496	C09	21582357	7.48716	10.987
TSA0.5-WH20	seq-new-rs36496	C09	21582357	6.8181	9.997
TSA-WH20	seq-new-rs36496	C09	21582357	6.33989	9.261
TSA-WH20	Bn-scaff_17799_1-p2987946	C09	39625508	6.22417	9.351
TRL0.5-WH20	seq-new-rs43953	C09	35442609	5.65557	8.499
TRN0.5-WH20	seq-new-rs43953	C09	35442609	5.63714	8.343
TSA-WH20	seq-new-rs43953	C09	35442609	5.18449	7.795
TRL0.5-WH20	seq-new-rs45144	C09	40316234	5.14002	7.738
TSA0.5-WH20	seq-new-rs43953	C09	35442609	4.94854	7.42
TSA0.5-WH20	Bn-scaff_20619_1-p528013	C09	31340315	4.66645	6.855
TRL0.5-WH20	Bn-scaff_20619_1-p528013	C09	31340315	4.54952	6.656
PRL-BLUE	seq-new-rs38185	C09	45670866	4.41251	5.236

## Sheet: Table S2
Table S2: Summary of QTL clusters associated with root-related traits in B. napus detected in WH17, WH19, WH20, and BLUE
Cluster	Trait	Marker	Chr	Pos	−log10(P)	PVE (%)	Haplotype Block (Mb)
qRT.A01-1	TRV-WH19	seq-new-rs37683	A01	19300987	4.41014	6.955	19.280-19.867
	TRV-WH19	Bn-A01-p23472646	A01	19346461	3.46788	5.422
	TRV-WH19	Bn-A01-p23477194	A01	19350103	4.87857	7.713
	TRN-WH17	Bn-A01-p22949106	A01	19439099	3.6727	5.916
qRT.A02-1	RFW-WH17	Bn-A02-p11772983	A02	8480672	7.81	11.85	8.451-8.705
	TSA-WH17	Bn-A02-p11772983	A02	8480672	7.80344	12.931
	TRV0.5-WH17	Bn-A02-p11772983	A02	8480672	7.11598	11.75
	TSA0.5-WH17	Bn-A02-p11772983	A02	8480672	6.16357	10.147
	TRV-WH17	Bn-A02-p11772983	A02	8480672	5.84179	9.712
	TRL-WH17	Bn-A02-p11772983	A02	8480672	5.58125	9.04
	RDW-WH17	Bn-A02-p11772983	A02	8480672	5.50864	8.097
	TRN-WH17	Bn-A02-p11772983	A02	8480672	5.43208	8.808
	TRL0.5-WH17	Bn-A02-p11772983	A02	8480672	4.09679	6.592
	RFW-WH20	Bn-A02-p11772983	A02	8480672	4.26399	6.156
qRT.A03-1	TRL-WH20	Bn-A03-p23996628	A03	22640512	3.43551	4.887	22.322-23.669
	TRL-WH20	seq-new-rs45370	A03	22850108	4.85205	7.757
	TRL-WH20	Bn-A03-p24363260	A03	22900381	4.81625	6.873
	TSA-WH20	Bn-A03-p24363811	A03	22900932	3.5048	4.967
	TSA-WH20	Bn-A03-p24395668	A03	22911470	3.60525	5.113
	TSA-WH20	seq-new-rs43951	A03	23031664	4.6815	6.69
	TRL-WH20	seq-new-rs43951	A03	23031664	4.63476	6.605
	TRL-WH20	seq-new-rs23058	A03	23075585	4.81622	6.873
	TRL-WH20	Bn-A03-p24612593	A03	23112618	5.06439	7.24
	TRL-WH20	Bn-A03-p24690789	A03	23157661	4.80156	8.153
	TRL-WH20	seq-new-rs42361	A03	23172158	3.68426	5.216
	RFW-WH20	Bn-A03-p24753829	A03	23207534	3.44078	4.879
	TRL-WH20	seq-new-rs48318	A03	23261331	5.40772	7.749
	TRN-WH20	seq-new-rs48318	A03	23261331	3.45184	4.856
	TSA-WH20	seq-new-rs41762	A03	23304467	3.54306	5.229
	RFW-WH20	Bn-A03-p24842021	A03	23322997	3.66148	5.2
	TRL-WH20	seq-new-rs47298	A03	23335474	5.27465	7.553
	TRN-WH20	seq-new-rs47298	A03	23335474	3.48113	4.903
	TRL-WH20	seq-new-rs23998	A03	23376597	5.44194	7.8
	TRN-WH20	seq-new-rs23998	A03	23376597	3.45726	4.864
	TRL-WH20	Bn-A03-p24971360	A03	23385744	5.47287	7.892
	TSA-WH20	Bn-A03-p24971360	A03	23385744	5.04731	7.294
	TRL0.5-WH20	Bn-A03-p24971360	A03	23385744	4.05978	5.856
	TRN0.5-WH20	Bn-A03-p24971360	A03	23385744	4.04928	5.776
	TSA0.5-WH20	Bn-A03-p24971360	A03	23385744	3.7667	5.4
	TRN-WH20	Bn-A03-p24971360	A03	23385744	3.44394	4.867
	TRL-WH20	Bn-A03-p24986472	A03	23400579	4.9943	7.136
	TRL-WH20	Bn-A03-p25009736	A03	23409540	5.09433	7.284
	TSA-WH20	Bn-A03-p25009736	A03	23409540	4.23452	6.032
	TRL-WH20	Bn-A03-p25024749	A03	23417240	5.07594	8.02
	TSA-WH20	Bn-A03-p25024749	A03	23417240	4.61005	7.316
	TRL0.5-WH20	Bn-A03-p25024749	A03	23417240	3.45386	5.237
qRT.A03-2	TSA-WH20	Bn-A03-p26001258	A03	24364511	4.46622	6.375	24.223-24.700
	TRL-WH20	Bn-A03-p26001258	A03	24364511	3.95948	5.617
	TSA-WH20	Bn-A03-p26071126	A03	24423120	4.13406	5.885
	TSA-WH20	Bn-A03-p26275444	A03	24663592	4.30733	7.068
	TRL-WH20	Bn-A03-p26275444	A03	24663592	3.95798	6.381
	TRN0.5-WH20	Bn-A03-p26275444	A03	24663592	3.82763	6.406
	TRL-WH20	Bn-A03-p26310351	A03	24700288	4.18834	5.95
qRT.A03-3	TRL-WH20	seq-new-rs37425	A03	25464206	4.95413	7.15	25.31-25.550
	TRL-WH20	Bn-A03-p27289437	A03	25525008	5.11375	7.315
	TSA-WH20	Bn-A03-p27289437	A03	25525008	3.97232	5.674
qRT.A05-1	RDW	Bn-A05-p6415983	A05	5964030	4.80947	7.129	5.959-6.458
	TRV0.5-WH17	Bn-A05-p6415983	A05	5964030	4.59817	6.141
	TSA-WH17	Bn-A05-p6415983	A05	5964030	3.74323	4.823
	PRL-WH19	seq-new-rs29817	A05	5984205	3.45107	5.398
	RFW-WH17	Bn-A05-p6984362	A05	6411956	4.40935	5.782
	TSA-WH17	Bn-A05-p6984362	A05	6411956	3.66362	5.232
	PRL-WH19	Bn-A05-p7052463	A05	6479726	4.16952	6.558
qRT.A05-2	TRL0.5-WH20	Bn-A05-p15113541	A05	11594569	8.97212	13.317	11.340-11.862
	TSA0.5-WH20	Bn-A05-p15113541	A05	11594569	7.86707	11.629
	TSA-WH20	Bn-A05-p15113541	A05	11594569	6.38078	9.327
	TRN0.5-WH20	Bn-A05-p15113541	A05	11594569	4.34216	6.26
qRT.A05-3	RDW	seq-new-rs37128	A05	16647352	7.7263	14.109	-
	RFW	seq-new-rs37128	A05	16647352	3.94082	5.698
	TSA0.5-WH17	seq-new-rs37128	A05	16647352	11.912	20.312
	TRV-WH17	seq-new-rs37128	A05	16647352	11.458	19.488
	TSA-WH17	seq-new-rs37128	A05	16647352	11.3711	19.286
	RFW-WH17	seq-new-rs37128	A05	16647352	10.2845	15.525
	TRV0.5-WH17	seq-new-rs37128	A05	16647352	9.59862	16.12
	RDW-WH17	seq-new-rs37128	A05	16647352	8.80129	13.186
	TRL0.5-WH17	seq-new-rs37128	A05	16647352	7.68141	12.633
	TRL-WH17	seq-new-rs37128	A05	16647352	7.67189	12.578
	TRN-WH17	seq-new-rs37128	A05	16647352	6.87985	11.215
qRT.A07-1	TRL0.5-WH20	MS1-755	A07	20269186	6.31653	9.137	20.221-20.673
	TSA-WH20	MS1-755	A07	20269186	4.55	6.497
	TSA0.5-WH20	MS1-755	A07	20269186	3.99706	5.689
	TRL0.5-WH20	MS1-930	A07	20269364	6.32548	9.528
	TSA-WH20	MS1-930	A07	20269364	4.58195	6.798
	TSA0.5-WH20	MS1-930	A07	20269364	4.01168	5.842
	TRL0.5-WH20	seq-new-rs45707	A07	20319584	6.31949	9.139
	TSA-WH20	seq-new-rs45707	A07	20319584	4.55211	6.499
	TSA0.5-WH20	seq-new-rs45707	A07	20319584	3.99805	5.69
qRT.A08-1	TRV-WH17	MS5-12	A08	17703594	4.43934	7.172	17.558-17.812
	TSA0.5-WH17	MS5-12	A08	17703594	3.70279	6.011
qRT.A09-1	PRL	seq-new-rs41996	A09	4405703	6.39723	9.993	4.359-4.420
	TSA	seq-new-rs41996	A09	4405703	3.81901	5.489
qRT.A09-2	TRN-WH20	seq-new-rs41374	A09	7034148	6.49469	10.438	-
	TRL-WH20	seq-new-rs41374	A09	7034148	5.11304	8.351
	TSA-WH20	seq-new-rs41374	A09	7034148	3.68094	6.071
qRT.A09-3	TRL0.5-WH20	seq-new-rs48456	A09	26867775	9.83251	14.727	26.643-26.926
	TSA0.5-WH20	seq-new-rs48456	A09	26867775	8.33957	12.438
	TSA-WH20	seq-new-rs48456	A09	26867775	6.35214	9.313
	TRN0.5-WH20	seq-new-rs48456	A09	26867775	4.27425	6.175
qRT.C01-1	TSA0.5-WH20	seq-new-rs27998	C01	29993826	4.60005	6.939	29.994-30.217
	TRL0.5-WH20	seq-new-rs27998	C01	29993826	3.83842	5.821
	TRV-WH20	seq-new-rs27998	C01	29993826	3.71483	5.83
	TRN0.5-WH20	seq-new-rs27998	C01	29993826	3.54077	5.526
qRT.C02-1	TSA0.5-WH17	seq-new-rs25271	C02	39555521	4.43893	7.379	-
	TSA-WH17	seq-new-rs25271	C02	39555521	4.03452	6.675
	RFW-WH17	seq-new-rs25271	C02	39555521	3.57505	5.329
	TRV-WH17	seq-new-rs25271	C02	39555521	3.51353	5.699
qRT.C03-1	TRV0.5-WH17	seq-new-rs30480	C03	14270416	4.80077	6.458	13.993-14.270
	TSA0.5-WH17	seq-new-rs30480	C03	14270416	3.91625	5.088
	TRV-WH17	seq-new-rs30480	C03	14270416	3.79882	4.895
	TSA-WH17	seq-new-rs30480	C03	14270416	3.68523	4.735
	RFW-WH17	seq-new-rs30480	C03	14270416	3.63569	4.204
qRT.C03-2	TRL0.5-WH20	Bn-scaff_15782_1-p111218	C03	16702113	9.30909	13.806	16.684-16.902
	TSA0.5-WH20	Bn-scaff_15782_1-p111218	C03	16702113	8.02331	11.869
	TSA-WH20	Bn-scaff_15782_1-p111218	C03	16702113	6.52645	9.567
	TRN0.5-WH20	Bn-scaff_15782_1-p111218	C03	16702113	4.9083	7.087
qRT.C03-3	TRL0.5-WH20	seq-new-rs35820	C03	17780902	4.87267	7.049	17.781-17.982
	TSA0.5-WH20	seq-new-rs35820	C03	17780902	4.61377	6.718
	TSA-WH20	seq-new-rs35820	C03	17780902	3.59698	5.207
qRT.C03-4	TRN	Bn-scaff_16755_1-p927921	C03	59713737	4.59872	7.168	59.332-59.871
	TRV-WH17	Bn-scaff_16755_1-p927921	C03	59713737	5.38348	9.855
	TSA0.5-WH17	Bn-scaff_16755_1-p927921	C03	59713737	5.00682	9.003
	RFW-WH17	Bn-scaff_16755_1-p927921	C03	59713737	4.8769	8.034
	TSA-WH17	Bn-scaff_16755_1-p927921	C03	59713737	4.73912	8.438
	RDW-WH17	Bn-scaff_16755_1-p927921	C03	59713737	4.36097	7.267
	TRV0.5-WH17	Bn-scaff_16755_1-p927921	C03	59713737	4.10212	7.733
qRT.C04-1	PRL-WH20	C04_362418	C04	362418	4.18545	6.087	0.115-0.406
	TRN-WH20	seq-new-rs35666	C04	378326	6.00421	8.62
	TRL-WH20	seq-new-rs35666	C04	378326	5.17965	7.422
	TSA-WH20	seq-new-rs35666	C04	378326	4.43023	6.349
	TRN-WH20	seq-new-rs25364	C04	399920	5.99831	8.611
	TRL-WH20	seq-new-rs25364	C04	399920	4.9317	7.054
	TSA-WH20	seq-new-rs25364	C04	399920	3.60732	5.139
qRT.C04-2	TRL0.5-WH20	Bn-scaff_16888_1-p45860	C04	44839791	9.20135	13.949	44.773-45.195
	TSA0.5-WH20	Bn-scaff_16888_1-p45860	C04	44839791	8.40578	12.679
	TSA-WH20	Bn-scaff_16888_1-p45860	C04	44839791	6.70801	10.054
	TRN0.5-WH20	Bn-scaff_16888_1-p45860	C04	44839791	4.3912	6.459
	TRV0.5-WH20	Bn-scaff_16888_1-p45860	C04	44839791	3.47942	5.108
qRT.C04-3	TSA0.5-WH17	Bn-scaff_20270_1-p620404	C04	46737401	6.19214	10.252	46.605-46.986
	TRV-WH17	Bn-scaff_20270_1-p620404	C04	46737401	5.54792	9.203
	TSA-WH17	Bn-scaff_20270_1-p620404	C04	46737401	5.40339	8.916
	TRV0.5-WH17	Bn-scaff_20270_1-p620404	C04	46737401	5.329	8.795
	TRL0.5-WH17	Bn-scaff_20270_1-p620404	C04	46737401	3.74108	6.075
qRT.C05-1	TRV0.5-WH19	Bn-scaff_16414_1-p884592	C05	1070282	4.60794	6.054	-
	TSA0.5-WH19	Bn-scaff_16414_1-p884592	C05	1070282	4.04222	5.209
	TSA-WH19	Bn-scaff_16414_1-p884592	C05	1070282	3.83908	4.884
qRT.C05-2	TSA0.5-WH17	seq-new-rs23993	C05	1701393	4.83761	7.782	1.693-1.973
	TRV-WH17	seq-new-rs23993	C05	1701393	4.26686	6.83
	TSA-WH17	seq-new-rs23993	C05	1701393	3.87507	6.179
	TRV0.5-WH17	seq-new-rs23993	C05	1701393	3.56738	5.722
	RDW-WH17	seq-new-rs23993	C05	1701393	3.44859	4.986
qRT.C06-1	TRN-WH20	seq-new-rs42652	C06	755904	6.10911	9.229	-
	TRL-WH20	seq-new-rs42652	C06	755904	4.95739	7.464
qRT.C06-2	TRL0.5-WH20	Bn-scaff_17917_1-p117089	C06	7880978	4.59762	6.886	7.864-7.975
	TSA0.5-WH20	Bn-scaff_17917_1-p117089	C06	7880978	4.26426	6.359
qRT.C06-3	DMR-WH17	seq-new-rs48553	C06	24666940	3.71188	5.341	-
	TRV-WH17	seq-new-rs46355	C06	24689070	4.70004	8.132
	RDW-WH17	seq-new-rs46355	C06	24689070	4.52145	7.194
	TRV0.5-WH17	seq-new-rs46355	C06	24689070	4.46165	7.544
qRT.C06-4	TSA0.5-WH17	Bn-scaff_17799_1-p717821	C06	35895670	4.99	7.163	35.673-35.896
	TRV-WH17	Bn-scaff_17799_1-p717821	C06	35895670	4.38598	6.698
	TRV0.5-WH17	Bn-scaff_17799_1-p717821	C06	35895670	4.24244	6.459
	TSA-WH17	Bn-scaff_17799_1-p717821	C06	35895670	3.95397	5.399
qRT.C07-1	TRL0.5-WH20	seq-new-rs28794	C07	11291488	4.57863	6.683	11.291-12.088
	TSA0.5-WH20	seq-new-rs28794	C07	11291488	4.17257	6.192
qRT.C07-2	TRL0.5-WH20	Bn-scaff_15754_1-p240930	C07	26701510	4.72471	6.907	26.698-26.803
	TSA0.5-WH20	Bn-scaff_15754_1-p240930	C07	26701510	4.33839	6.338
qRT.C07-3	TSA0.5-WH20	seq-new-rs29209	C07	29979020	4.7497	6.845	29.855-30.207
	TRL0.5-WH20	seq-new-rs29209	C07	29979020	4.36975	6.252
	TSA-WH20	seq-new-rs29209	C07	29979020	3.76023	5.379
qRT.C07-4	PRL	seq-new-rs46512	C07	35123112	6.07403	8.773	34.945-35.123
	TSA	seq-new-rs46512	C07	35123112	3.97844	5.588
qRT.C07-5	TRV-WH20	Bn-scaff_16110_1-p1193197	C07	43751429	4.63504	6.566	43.759-43.770
	DMR-WH20	Bn-scaff_16110_1-p1185491	C07	43759164	4.08063	5.824
	RFW-WH20	Bn-scaff_16110_1-p1185491	C07	43759164	3.72205	5.313
	TRV-WH20	Bn-scaff_16110_1-p1185491	C07	43759164	3.45627	4.811
qRT.C08-1	TSA-WH17	C08_21120661	C08	21120661	8.61699	14.239	20.814-21.123
	TSA0.5-WH17	C08_21120661	C08	21120661	8.1954	13.499
	TRV-WH17	C08_21120661	C08	21120661	7.16844	11.68
	RFW-WH17	C08_21120661	C08	21120661	7.0223	10.309
	TRL-WH17	C08_21120661	C08	21120661	6.46619	10.483
	TRV0.5-WH17	C08_21120661	C08	21120661	6.40945	10.404
	RDW-WH17	C08_21120661	C08	21120661	6.25214	9.144
	TRN-WH17	C08_21120661	C08	21120661	6.05824	9.785
	TRL0.5-WH17	C08_21120661	C08	21120661	5.3635	8.644
qRT.C08-2	PRL-WH19	seq-new-rs39808	C08	22313636	4.02543	6.458	-
	PRL-WH20	seq-new-rs39808	C08	22313636	4.35012	6.285
qRT.C09-1	TRL0.5-WH20	seq-new-rs36496	C09	21582357	7.48716	10.987	21.573-21.927
	TSA0.5-WH20	seq-new-rs36496	C09	21582357	6.8181	9.997
	TSA-WH20	seq-new-rs36496	C09	21582357	6.33989	9.261
	TRL-WH20	seq-new-rs36496	C09	21582357	4.16239	5.921
	TRN0.5-WH20	seq-new-rs36496	C09	21582357	3.98414	5.722
qRT.C09-2	TSA0.5-WH20	Bn-scaff_20619_1-p528013	C09	31340315	4.66645	6.855	31.298-32.938
	TRL0.5-WH20	Bn-scaff_20619_1-p528013	C09	31340315	4.54952	6.656
	TSA-WH20	Bn-scaff_20619_1-p528013	C09	31340315	4.20959	6.191
qRT.C09-3	TRL0.5-WH20	seq-new-rs43953	C09	35442609	5.65557	8.499	35.330-35.697
	TRN0.5-WH20	seq-new-rs43953	C09	35442609	5.63714	8.343
	TSA-WH20	seq-new-rs43953	C09	35442609	5.18449	7.795
	TSA0.5-WH20	seq-new-rs43953	C09	35442609	4.94854	7.42
qRT.C09-4	TRL0.5-WH20	Bn-scaff_17799_1-p2987946	C09	39625508	9.10626	13.659	39.357-39.838
	TSA0.5-WH20	Bn-scaff_17799_1-p2987946	C09	39625508	8.20259	12.395
	TSA-WH20	Bn-scaff_17799_1-p2987946	C09	39625508	6.22417	9.351
	TRN0.5-WH20	Bn-scaff_17799_1-p2987946	C09	39625508	4.17111	6.237
qRT.C09-5	TRL0.5-WH20	seq-new-rs45144	C09	40316234	5.14002	7.738	40.316-40.572
	TSA0.5-WH20	seq-new-rs45144	C09	40316234	3.71557	5.495

## Sheet: Table S3
Table S3: List of all potential candidate genes within 100kb upstream and downstream of the lead SNPs
Marker	Marker position (bp)	Chr	Gene	Gene start	Gene end	Homologous genes in Arabidopsis	Interpro Annotation
seq-new-rs27069	19833111	chrA01	BnaA01g28280D	19727398	19728915	AT3G16030.1	CALLUS EXPRESSION OF RBCS 101 (CES101); FUNCTIONS IN: in 6 functions; INVOLVED IN: protein amino acid phosphorylation; LOCATED IN: endomembrane system; EXPRESSED IN: 21 plant structures; EXPRESSED DURING: 13 growth stages; CONTAINS InterPro DOMAIN/s: Curculin-like (mannose-binding) lectin (InterPro:IPR001480), PAN-2 domain (InterPro:IPR013227), Apple-like (InterPro:IPR003609), Serine/threonine-pr…	gi|397134747|gb|AFO11038.1|	S domain subfamily receptor-like kinase [Arabidopsis thaliana]
	19833111	chrA01	BnaA01g28290D	19734860	19736125	AT3G16820.1	F-box and associated interaction domains-containing protein; CONTAINS InterPro DOMAIN/s: F-box domain, cyclin-like (InterPro:IPR001810), F-box domain, Skp2-like (InterPro:IPR022364), F-box associated domain, type 1 (InterPro:IPR006527), F-box associated interaction domain (InterPro:IPR017451); BEST Arabidopsis thaliana protein match is: F-box and associated interaction domains-containing protein …	gi|7939574|dbj|BAA95775.1|	unnamed protein product [Arabidopsis thaliana]
	19833111	chrA01	BnaA01g28300D	19738233	19740474	AT3G16000.1	MAR binding filament-like protein 1 (MFP1); FUNCTIONS IN: DNA binding; LOCATED IN: chloroplast thylakoid membrane, chloroplast, plastid nucleoid; EXPRESSED IN: 22 plant structures; EXPRESSED DURING: 13 growth stages; Has 259345 Blast hits to 118150 proteins in 3812 species: Archae - 3889; Bacteria - 64552; Metazoa - 100119; Fungi - 19969; Plants - 13824; Viruses - 1177; Other Eukaryotes - 55815 (…	gi|42564228|ref|NP_188221.2|	MAR-binding filament-like protein 1 [Arabidopsis thaliana] &gt;gi|83304464|sp|Q9LW85.2|MFP1_ARATH RecName: Full=MAR-binding filament-like protein 1 &gt;gi|30794108|gb|AAP40496.1| putative myosin heavy chain [Arabidopsis thaliana] &gt;gi|332642240|gb|AEE75761.1| MAR-binding filament-like protein 1 [Arabidopsis thaliana]
	19833111	chrA01	BnaA01g28310D	19740603	19744664	AT3G15990.1	sulfate transporter 3;4 (SULTR3;4); FUNCTIONS IN: sulfate transmembrane transporter activity; INVOLVED IN: sulfate transport, transport, transmembrane transport; LOCATED IN: integral to membrane, membrane; EXPRESSED IN: 10 plant structures; EXPRESSED DURING: 4 anthesis, C globular stage, petal differentiation and expansion stage, E expanded cotyledon stage, D bilateral stage; CONTAINS InterPro DO…	gi|15233255|ref|NP_188220.1|	putative sulfate transporter 3;4 [Arabidopsis thaliana] &gt;gi|37089876|sp|Q9LW86.1|SUT34_ARATH RecName: Full=Probable sulfate transporter 3.4 &gt;gi|9294446|dbj|BAB02665.1| sulfate transporter [Arabidopsis thaliana] &gt;gi|12381949|dbj|BAB21264.1| sulfate transporter Sultr3;4 [Arabidopsis thaliana] &gt;gi|332642239|gb|AEE75760.1| putative sulfate transporter 3;4 [Arabidopsis thaliana]
	19833111	chrA01	BnaA01g28320D	19764272	19764467	-		-	-
	19833111	chrA01	BnaA01g28330D	19770193	19776914	AT3G15980.3	Coatomer, beta' subunit; FUNCTIONS IN: structural molecule activity; INVOLVED IN: intracellular protein transport, vesicle-mediated transport; LOCATED IN: membrane coat, COPI vesicle coat; EXPRESSED IN: 25 plant structures; EXPRESSED DURING: 13 growth stages; CONTAINS InterPro DOMAIN/s: WD40 repeat 2 (InterPro:IPR019782), Coatomer, WD associated region (InterPro:IPR006692), WD40 repeat (InterPro:…	gi|30683865|ref|NP_188219.2|	coatomer subunit beta&apos;-3 [Arabidopsis thaliana] &gt;gi|30683868|ref|NP_850593.1| coatomer subunit beta&apos;-3 [Arabidopsis thaliana] &gt;gi|222422950|dbj|BAH19460.1| AT3G15980 [Arabidopsis thaliana] &gt;gi|332642235|gb|AEE75756.1| coatomer subunit beta&apos;-3 [Arabidopsis thaliana] &gt;gi|332642236|gb|AEE75757.1| coatomer subunit beta&apos;-3 [Arabidopsis thaliana]
	19833111	chrA01	BnaA01g28340D	19797051	19802954	AT3G15950.2	NAI2; INVOLVED IN: ER body organization, response to salt stress; LOCATED IN: peroxisome, membrane, ER body; EXPRESSED IN: 16 plant structures; EXPRESSED DURING: 7 growth stages; BEST Arabidopsis thaliana protein match is: TSK-associating protein 1 (TAIR:AT1G52410.2); Has 35333 Blast hits to 34131 proteins in 2444 species: Archae - 798; Bacteria - 22429; Metazoa - 974; Fungi - 991; Plants - 531; …	gi|297834472|ref|XP_002885118.1|	predicted protein [Arabidopsis lyrata subsp. lyrata] &gt;gi|297330958|gb|EFH61377.1| predicted protein [Arabidopsis lyrata subsp. lyrata]
	19833111	chrA01	BnaA01g28350D	19803939	19804416	AT4G14540.1	nuclear factor Y, subunit B3 (NF-YB3); FUNCTIONS IN: sequence-specific DNA binding transcription factor activity; INVOLVED IN: regulation of transcription, DNA-dependent; LOCATED IN: nucleus, intracellular; EXPRESSED IN: 21 plant structures; EXPRESSED DURING: 13 growth stages; CONTAINS InterPro DOMAIN/s: Transcription factor, CBFA/NFYB, DNA topoisomerase (InterPro:IPR003957), Transcription factor…	gi|584431935|gb|AHI94919.1|	transcription factor subunit NF-YB3B [Brassica napus]
	19833111	chrA01	BnaA01g28360D	19805086	19807015	AT3G15930.1	Pentatricopeptide repeat (PPR) superfamily protein; CONTAINS InterPro DOMAIN/s: Pentatricopeptide repeat (InterPro:IPR002885); BEST Arabidopsis thaliana protein match is: Tetratricopeptide repeat (TPR)-like superfamily protein (TAIR:AT2G29760.1); Has 42861 Blast hits to 14596 proteins in 286 species: Archae - 0; Bacteria - 14; Metazoa - 129; Fungi - 192; Plants - 41743; Viruses - 0; Other Eukaryo…	gi|9294596|dbj|BAB02877.1|	unnamed protein product [Arabidopsis thaliana]
	19833111	chrA01	BnaA01g28370D	19807391	19810010	AT3G15920.1	Phox (PX) domain-containing protein; CONTAINS InterPro DOMAIN/s: Phox-like (InterPro:IPR001683); BEST Arabidopsis thaliana protein match is: Phox (PX) domain-containing protein (TAIR:AT4G32160.1); Has 39660 Blast hits to 24703 proteins in 1619 species: Archae - 570; Bacteria - 4339; Metazoa - 20583; Fungi - 3176; Plants - 1789; Viruses - 109; Other Eukaryotes - 9094 (source: NCBI BLink).	gi|297834466|ref|XP_002885115.1|	phox domain-containing protein [Arabidopsis lyrata subsp. lyrata] &gt;gi|297330955|gb|EFH61374.1| phox domain-containing protein [Arabidopsis lyrata subsp. lyrata]
	19833111	chrA01	BnaA01g28380D	19810099	19810900	AT3G15920.1	Phox (PX) domain-containing protein; CONTAINS InterPro DOMAIN/s: Phox-like (InterPro:IPR001683); BEST Arabidopsis thaliana protein match is: Phox (PX) domain-containing protein (TAIR:AT4G32160.1); Has 39660 Blast hits to 24703 proteins in 1619 species: Archae - 570; Bacteria - 4339; Metazoa - 20583; Fungi - 3176; Plants - 1789; Viruses - 109; Other Eukaryotes - 9094 (source: NCBI BLink).	gi|297834466|ref|XP_002885115.1|	phox domain-containing protein [Arabidopsis lyrata subsp. lyrata] &gt;gi|297330955|gb|EFH61374.1| phox domain-containing protein [Arabidopsis lyrata subsp. lyrata]
	19833111	chrA01	BnaA01g28390D	19810976	19811790	AT3G15900.1	unknown protein; FUNCTIONS IN: molecular_function unknown; INVOLVED IN: biological_process unknown; LOCATED IN: chloroplast; EXPRESSED IN: 23 plant structures; EXPRESSED DURING: 13 growth stages; Has 26 Blast hits to 26 proteins in 10 species: Archae - 0; Bacteria - 0; Metazoa - 0; Fungi - 0; Plants - 26; Viruses - 0; Other Eukaryotes - 0 (source: NCBI BLink).	gi|18400941|ref|NP_566531.1|	uncharacterized protein [Arabidopsis thaliana] &gt;gi|9294593|dbj|BAB02874.1| unnamed protein product [Arabidopsis thaliana] &gt;gi|21553906|gb|AAM62989.1| unknown [Arabidopsis thaliana] &gt;gi|107738038|gb|ABF83618.1| At3g15900 [Arabidopsis thaliana] &gt;gi|332642223|gb|AEE75744.1| uncharacterized protein AT3G15900 [Arabidopsis thaliana]
	19833111	chrA01	BnaA01g28400D	19811953	19813119	AT3G15890.1	Protein kinase superfamily protein; FUNCTIONS IN: protein tyrosine kinase activity, protein kinase activity, kinase activity, ATP binding; INVOLVED IN: protein amino acid phosphorylation; LOCATED IN: plasma membrane; EXPRESSED IN: 17 plant structures; EXPRESSED DURING: 8 growth stages; CONTAINS InterPro DOMAIN/s: Protein kinase, ATP binding site (InterPro:IPR017441), Protein kinase, catalytic dom…	gi|18400939|ref|NP_566530.1|	PTI1-like tyrosine-protein kinase [Arabidopsis thaliana] &gt;gi|75335398|sp|Q9LSC2.1|Y3589_ARATH RecName: Full=PTI1-like tyrosine-protein kinase At3g15890 &gt;gi|9294592|dbj|BAB02873.1| protein kinase-like protein [Arabidopsis thaliana] &gt;gi|332642222|gb|AEE75743.1| PTI1-like tyrosine-protein kinase [Arabidopsis thaliana]
	19833111	chrA01	BnaA01g28410D	19821209	19827522	AT3G15880.1	WUS-interacting protein 2 (WSIP2); FUNCTIONS IN: protein binding; INVOLVED IN: primary shoot apical meristem specification; LOCATED IN: endomembrane system; EXPRESSED IN: 24 plant structures; EXPRESSED DURING: 15 growth stages; CONTAINS InterPro DOMAIN/s: WD40 repeat 2 (InterPro:IPR019782), WD40 repeat, conserved site (InterPro:IPR019775), WD40 repeat (InterPro:IPR001680), CTLH, C-terminal LisH m…	gi|79598662|ref|NP_851003.2|	WUS-interacting protein 2 [Arabidopsis thaliana] &gt;gi|298352695|sp|Q27GK7.2|TPR4_ARATH RecName: Full=Topless-related protein 4; AltName: Full=WUS-interacting protein 2 &gt;gi|332642219|gb|AEE75740.1| WUS-interacting protein 2 [Arabidopsis thaliana]
	19833111	chrA01	BnaA01g28420D	19828016	19828517	AT3G15860.1	FUNCTIONS IN: molecular_function unknown; INVOLVED IN: biological_process unknown; LOCATED IN: endomembrane system; EXPRESSED IN: pollen tube; CONTAINS InterPro DOMAIN/s: Plant self-incompatibility S1 (InterPro:IPR010264); BEST Arabidopsis thaliana protein match is: Plant self-incompatibility protein S1 family (TAIR:AT5G26090.1); Has 19 Blast hits to 16 proteins in 2 species: Archae - 0; Bacteria…	gi|116830641|gb|ABK28278.1|	unknown [Arabidopsis thaliana]
	19833111	chrA01	BnaA01g28430D	19828696	19829040	AT3G15850.1	fatty acid desaturase 5 (FAD5); CONTAINS InterPro DOMAIN/s: Fatty acid desaturase, type 1, core (InterPro:IPR015876), Fatty acid desaturase, type 1 (InterPro:IPR005804); BEST Arabidopsis thaliana protein match is: Fatty acid desaturase family protein (TAIR:AT3G15870.1); Has 3424 Blast hits to 3424 proteins in 822 species: Archae - 0; Bacteria - 1534; Metazoa - 801; Fungi - 236; Plants - 106; Viru…	gi|21554352|gb|AAM63459.1|	putative delta 9 desaturase [Arabidopsis thaliana]
	19833111	chrA01	BnaA01g28440D	19833352	19834804	AT3G14330.1	Tetratricopeptide repeat (TPR)-like superfamily protein; CONTAINS InterPro DOMAIN/s: Pentatricopeptide repeat (InterPro:IPR002885); BEST Arabidopsis thaliana protein match is: Tetratricopeptide repeat (TPR)-like superfamily protein (TAIR:AT3G46790.1); Has 35559 Blast hits to 14091 proteins in 265 species: Archae - 0; Bacteria - 6; Metazoa - 58; Fungi - 108; Plants - 34937; Viruses - 0; Other Euka…	gi|15231831|ref|NP_188050.1|	pentatricopeptide repeat-containing protein [Arabidopsis thaliana] &gt;gi|218546762|sp|Q9LUL5.2|PP229_ARATH RecName: Full=Pentatricopeptide repeat-containing protein At3g14330 &gt;gi|332641981|gb|AEE75502.1| pentatricopeptide repeat-containing protein [Arabidopsis thaliana]
	19833111	chrA01	BnaA01g28450D	19835396	19837788	AT3G16060.1	ATP binding microtubule motor family protein; FUNCTIONS IN: microtubule motor activity, ATP binding; INVOLVED IN: microtubule-based movement; LOCATED IN: nucleus, plasma membrane; EXPRESSED IN: 22 plant structures; EXPRESSED DURING: 13 growth stages; CONTAINS InterPro DOMAIN/s: Kinesin, motor region, conserved site (InterPro:IPR019821), Kinesin, motor domain (InterPro:IPR001752); BEST Arabidopsis…	gi|9294452|dbj|BAB02671.1|	unnamed protein product [Arabidopsis thaliana]
	19833111	chrA01	BnaA01g28460D	19838761	19842559	AT2G07240.1	cysteine-type peptidases;cysteine-type peptidases; FUNCTIONS IN: cysteine-type peptidase activity; INVOLVED IN: proteolysis; LOCATED IN: cellular_component unknown; CONTAINS InterPro DOMAIN/s: Domain of unknown function DUF1985 (InterPro:IPR015410), Peptidase C48, SUMO/Sentrin/Ubl1 (InterPro:IPR003653); Has 30201 Blast hits to 17322 proteins in 780 species: Archae - 12; Bacteria - 1396; Metazoa -…	gi|89257449|gb|ABD64941.1|	Ulp1 protease family protein [Brassica oleracea]
	19833111	chrA01	BnaA01g28470D	19842846	19843358	AT5G33393.1	unknown protein; LOCATED IN: chloroplast; Has 30201 Blast hits to 17322 proteins in 780 species: Archae - 12; Bacteria - 1396; Metazoa - 17338; Fungi - 3422; Plants - 5037; Viruses - 0; Other Eukaryotes - 2996 (source: NCBI BLink).	gi|297790736|ref|XP_002863253.1|	predicted protein [Arabidopsis lyrata subsp. lyrata] &gt;gi|297309087|gb|EFH39512.1| predicted protein [Arabidopsis lyrata subsp. lyrata]
	19833111	chrA01	BnaA01g28480D	19851322	19853076	AT3G15820.1	REDUCED OLEATE DESATURATION 1 (ROD1); BEST Arabidopsis thaliana protein match is: phosphatidic acid phosphatase-related / PAP2-related (TAIR:AT3G15830.1); Has 58 Blast hits to 58 proteins in 17 species: Archae - 0; Bacteria - 2; Metazoa - 0; Fungi - 0; Plants - 38; Viruses - 0; Other Eukaryotes - 18 (source: NCBI BLink).	gi|18400910|ref|NP_566527.1|	phosphatidylcholine:diacylglycerol cholinephosphotransferase [Arabidopsis thaliana] &gt;gi|75274406|sp|Q9LVZ7.1|PDCT1_ARATH RecName: Full=Phosphatidylcholine:diacylglycerol cholinephosphotransferase 1; Short=AtPDCT1; AltName: Full=Protein REDUCED OLEATE DESATURATION 1 &gt;gi|11994354|dbj|BAB02313.1| unnamed protein product [Arabidopsis thaliana] &gt;gi|21554290|gb|AAM63365.1| unknown [Arabidopsis…
	19833111	chrA01	BnaA01g28490D	19853942	19856161	AT3G15800.1	Glycosyl hydrolase superfamily protein; FUNCTIONS IN: cation binding, hydrolase activity, hydrolyzing O-glycosyl compounds, catalytic activity; INVOLVED IN: carbohydrate metabolic process; LOCATED IN: anchored to membrane; EXPRESSED IN: root; CONTAINS InterPro DOMAIN/s: Glycoside hydrolase, family 17 (InterPro:IPR000490), Glycoside hydrolase, catalytic core (InterPro:IPR017853), Glycoside hydrola…	gi|11994352|dbj|BAB02311.1|	beta-1,3-glucanase-like protein [Arabidopsis thaliana]
	19833111	chrA01	BnaA01g28500D	19856583	19858041	AT3G15790.1	methyl-CPG-binding domain 11 (MBD11); FUNCTIONS IN: methyl-CpG binding, DNA binding; INVOLVED IN: biological_process unknown; LOCATED IN: nucleus; EXPRESSED IN: 22 plant structures; EXPRESSED DURING: 13 growth stages; CONTAINS InterPro DOMAIN/s: DNA-binding, integrase-type (InterPro:IPR016177), Methyl-CpG DNA binding (InterPro:IPR001739); BEST Arabidopsis thaliana protein match is: methyl-CPG-bin…	gi|15232694|ref|NP_188200.1|	methyl-CPG-binding domain-containing protein 11 [Arabidopsis thaliana] &gt;gi|75274409|sp|Q9LW00.1|MBD11_ARATH RecName: Full=Methyl-CpG-binding domain-containing protein 11; Short=AtMBD11; Short=MBD11; AltName: Full=Methyl-CpG-binding protein MBD11 &gt;gi|11994351|dbj|BAB02310.1| unnamed protein product [Arabidopsis thaliana] &gt;gi|50253442|gb|AAT71923.1| At3g15790 [Arabidopsis thaliana] &gt;gi|…
	19833111	chrA01	BnaA01g28510D	19858581	19859589	AT3G15780.1	unknown protein; BEST Arabidopsis thaliana protein match is: unknown protein (TAIR:AT1G52550.1); Has 20 Blast hits to 20 proteins in 5 species: Archae - 0; Bacteria - 0; Metazoa - 0; Fungi - 0; Plants - 20; Viruses - 0; Other Eukaryotes - 0 (source: NCBI BLink).	gi|15232692|ref|NP_188199.1|	uncharacterized protein [Arabidopsis thaliana] &gt;gi|11994350|dbj|BAB02309.1| unnamed protein product [Arabidopsis thaliana] &gt;gi|17065466|gb|AAL32887.1| Unknown protein [Arabidopsis thaliana] &gt;gi|20148569|gb|AAM10175.1| unknown protein [Arabidopsis thaliana] &gt;gi|332642205|gb|AEE75726.1| uncharacterized protein AT3G15780 [Arabidopsis thaliana]
	19833111	chrA01	BnaA01g28520D	19860277	19861138	AT3G15760.1	unknown protein; FUNCTIONS IN: molecular_function unknown; INVOLVED IN: biological_process unknown; LOCATED IN: endomembrane system; EXPRESSED IN: 22 plant structures; EXPRESSED DURING: 10 growth stages; BEST Arabidopsis thaliana protein match is: unknown protein (TAIR:AT1G52565.1); Has 42 Blast hits to 42 proteins in 10 species: Archae - 0; Bacteria - 0; Metazoa - 0; Fungi - 0; Plants - 42; Viru…	gi|297830156|ref|XP_002882960.1|	predicted protein [Arabidopsis lyrata subsp. lyrata] &gt;gi|297328800|gb|EFH59219.1| predicted protein [Arabidopsis lyrata subsp. lyrata]
	19833111	chrA01	BnaA01g28530D	19861858	19863714	AT3G15730.1	phospholipase D alpha 1 (PLDALPHA1); FUNCTIONS IN: phospholipase D activity, phosphatidylinositol-4,5-bisphosphate binding; INVOLVED IN: response to cadmium ion, fatty acid metabolic process, seed germination, regulation of stomatal movement, positive regulation of abscisic acid mediated signaling pathway; LOCATED IN: in 6 components; EXPRESSED IN: 24 plant structures; EXPRESSED DURING: 15 growth…	gi|541136202|gb|AGV22364.1|	phospholipase D4 [Brassica napus]
	19833111	chrA01	BnaA01g28540D	19863769	19865671	AT3G15730.1	phospholipase D alpha 1 (PLDALPHA1); FUNCTIONS IN: phospholipase D activity, phosphatidylinositol-4,5-bisphosphate binding; INVOLVED IN: response to cadmium ion, fatty acid metabolic process, seed germination, regulation of stomatal movement, positive regulation of abscisic acid mediated signaling pathway; LOCATED IN: in 6 components; EXPRESSED IN: 24 plant structures; EXPRESSED DURING: 15 growth…	gi|541136202|gb|AGV22364.1|	phospholipase D4 [Brassica napus]
	19833111	chrA01	BnaA01g28550D	19869368	19870782	AT1G52600.1	Peptidase S24/S26A/S26B/S26C family protein; FUNCTIONS IN: peptidase activity; INVOLVED IN: proteolysis, signal peptide processing; LOCATED IN: endoplasmic reticulum, plasma membrane, membrane; EXPRESSED IN: 26 plant structures; EXPRESSED DURING: 14 growth stages; CONTAINS InterPro DOMAIN/s: Peptidase S24/S26A/S26B, conserved region (InterPro:IPR019759), Peptidase S26B, eukaryotic signal peptidas…	gi|18400874|ref|NP_566523.1|	peptidase S24/S26A/S26B/S26C family protein [Arabidopsis thaliana] &gt;gi|11994343|dbj|BAB02302.1| signal sequence processing protein; peptidase-like protein [Arabidopsis thaliana] &gt;gi|50897212|gb|AAT85745.1| At3g15710 [Arabidopsis thaliana] &gt;gi|51972110|gb|AAU15159.1| At3g15710 [Arabidopsis thaliana] &gt;gi|332642196|gb|AEE75717.1| peptidase S24/S26A/S26B/S26C family protein [Arabidopsis t…
	19833111	chrA01	BnaA01g28560D	19873236	19874903	AT3G15700.1	P-loop containing nucleoside triphosphate hydrolases superfamily protein; FUNCTIONS IN: ATP binding; INVOLVED IN: defense response, apoptosis; LOCATED IN: cellular_component unknown; CONTAINS InterPro DOMAIN/s: NB-ARC (InterPro:IPR002182), Disease resistance protein (InterPro:IPR000767); BEST Arabidopsis thaliana protein match is: P-loop containing nucleoside triphosphate hydrolases superfamily p…	gi|297834444|ref|XP_002885104.1|	predicted protein [Arabidopsis lyrata subsp. lyrata] &gt;gi|297330944|gb|EFH61363.1| predicted protein [Arabidopsis lyrata subsp. lyrata]
	19833111	chrA01	BnaA01g28570D	19875589	19875784	-		gi|565485172|ref|XP_006300226.1|	hypothetical protein CARUB_v10016462mg [Capsella rubella] &gt;gi|482568935|gb|EOA33124.1| hypothetical protein CARUB_v10016462mg [Capsella rubella]
	19833111	chrA01	BnaA01g28580D	19875872	19878327	AT3G15690.1	Single hybrid motif superfamily protein; LOCATED IN: chloroplast; EXPRESSED IN: 22 plant structures; EXPRESSED DURING: 13 growth stages; CONTAINS InterPro DOMAIN/s: Single hybrid motif (InterPro:IPR011053), Biotin/lipoyl attachment (InterPro:IPR000089); BEST Arabidopsis thaliana protein match is: Single hybrid motif superfamily protein (TAIR:AT1G52670.1); Has 1933 Blast hits to 1932 proteins in 8…	gi|11994341|dbj|BAB02300.1|	unnamed protein product [Arabidopsis thaliana]
	19833111	chrA01	BnaA01g28590D	19879515	19881015	AT3G15680.1	Ran BP2/NZF zinc finger-like superfamily protein; FUNCTIONS IN: binding, zinc ion binding; INVOLVED IN: biological_process unknown; LOCATED IN: intracellular; EXPRESSED IN: 21 plant structures; EXPRESSED DURING: 13 growth stages; CONTAINS InterPro DOMAIN/s: Zinc finger, RanBP2-type (InterPro:IPR001876); BEST Arabidopsis thaliana protein match is: Ran BP2/NZF zinc finger-like superfamily protein (…	gi|15232662|ref|NP_188189.1|	Ran BP2/NZF zinc finger-like protein [Arabidopsis thaliana] &gt;gi|11994340|dbj|BAB02299.1| zinc finger protein-like; Ser/Thr protein kinase-like protein [Arabidopsis thaliana] &gt;gi|89274153|gb|ABD65597.1| At3g15680 [Arabidopsis thaliana] &gt;gi|332642192|gb|AEE75713.1| Ran BP2/NZF zinc finger-like protein [Arabidopsis thaliana]
	19833111	chrA01	BnaA01g28600D	19885285	19886322	AT3G15670.1	Late embryogenesis abundant protein (LEA) family protein; FUNCTIONS IN: molecular_function unknown; INVOLVED IN: embryo development ending in seed dormancy; LOCATED IN: nucleus; EXPRESSED DURING: dry seed stage; BEST Arabidopsis thaliana protein match is: Late embryogenesis abundant protein (LEA) family protein (TAIR:AT1G52690.2); Has 12897 Blast hits to 6829 proteins in 1482 species: Archae - 30…	gi|20126724|dbj|BAB88878.1|	late embryogenesis-abundant protein [Brassica rapa]
	19833111	chrA01	BnaA01g28610D	19887621	19888957	AT3G15660.2	glutaredoxin 4 (GRX4); FUNCTIONS IN: metal ion binding; INVOLVED IN: cell redox homeostasis; LOCATED IN: mitochondrion; EXPRESSED IN: 23 plant structures; EXPRESSED DURING: 13 growth stages; CONTAINS InterPro DOMAIN/s: Glutaredoxin (InterPro:IPR002109), Thioredoxin fold (InterPro:IPR012335), Thioredoxin-like fold (InterPro:IPR012336), Glutaredoxin-related protein (InterPro:IPR004480); BEST Arabid…	gi|21592763|gb|AAM64712.1|	unknown [Arabidopsis thaliana]
	19833111	chrA01	BnaA01g28620D	19889095	19890728	AT3G15650.1	alpha/beta-Hydrolases superfamily protein; FUNCTIONS IN: hydrolase activity, carboxylesterase activity; EXPRESSED IN: 16 plant structures; EXPRESSED DURING: 11 growth stages; CONTAINS InterPro DOMAIN/s: Phospholipase/carboxylesterase (InterPro:IPR003140); BEST Arabidopsis thaliana protein match is: alpha/beta-Hydrolases superfamily protein (TAIR:AT1G52700.1); Has 2036 Blast hits to 2021 proteins …	gi|334185375|ref|NP_001189903.1|	alpha/beta-Hydrolases superfamily protein [Arabidopsis thaliana] &gt;gi|332642188|gb|AEE75709.1| alpha/beta-Hydrolases superfamily protein [Arabidopsis thaliana]
	19833111	chrA01	BnaA01g28630D	19901979	19904943	AT3G15620.1	UV REPAIR DEFECTIVE 3 (UVR3); CONTAINS InterPro DOMAIN/s: Rossmann-like alpha/beta/alpha sandwich fold (InterPro:IPR014729), DNA photolyase, N-terminal (InterPro:IPR006050), DNA photolyase, FAD-binding/Cryptochrome, C-terminal (InterPro:IPR005101); BEST Arabidopsis thaliana protein match is: cryptochrome 2 (TAIR:AT1G04400.1); Has 8860 Blast hits to 8829 proteins in 1491 species: Archae - 102; Bac…	gi|18400841|ref|NP_566520.1|	(6-4)DNA photolyase [Arabidopsis thaliana] &gt;gi|306756349|sp|O48652.2|UVR3_ARATH RecName: Full=(6-4)DNA photolyase; AltName: Full=Protein UV repair defective 3 &gt;gi|332642182|gb|AEE75703.1| (6-4)DNA photolyase [Arabidopsis thaliana]
	19833111	chrA01	BnaA01g28640D	19908427	19911314	AT3G15550.1	unknown protein; Has 25732 Blast hits to 16979 proteins in 961 species: Archae - 144; Bacteria - 1801; Metazoa - 12681; Fungi - 1868; Plants - 912; Viruses - 94; Other Eukaryotes - 8232 (source: NCBI BLink).	gi|240255352|ref|NP_188174.4|	uncharacterized protein [Arabidopsis thaliana] &gt;gi|11994223|dbj|BAB01345.1| unnamed protein product [Arabidopsis thaliana] &gt;gi|332642171|gb|AEE75692.1| uncharacterized protein AT3G15550 [Arabidopsis thaliana]
	19833111	chrA01	BnaA01g28650D	19914299	19915824	AT1G28030.1	2-oxoglutarate (2OG) and Fe(II)-dependent oxygenase superfamily protein; CONTAINS InterPro DOMAIN/s: Oxoglutarate/iron-dependent oxygenase (InterPro:IPR005123); BEST Arabidopsis thaliana protein match is: 2-oxoglutarate (2OG) and Fe(II)-dependent oxygenase superfamily protein (TAIR:AT1G52820.1); Has 5089 Blast hits to 5024 proteins in 625 species: Archae - 0; Bacteria - 336; Metazoa - 25; Fungi -…	gi|15217812|ref|NP_174124.1|	2-oxoglutarate (2OG) and Fe(II)-dependent oxygenase superfamily protein [Arabidopsis thaliana] &gt;gi|12322993|gb|AAG51483.1|AC069471_14 oxidoreductase, putative [Arabidopsis thaliana] &gt;gi|332192783|gb|AEE30904.1| 2-oxoglutarate (2OG) and Fe(II)-dependent oxygenase superfamily protein [Arabidopsis thaliana]
	19833111	chrA01	BnaA01g28660D	19921143	19923181	AT1G28030.1	2-oxoglutarate (2OG) and Fe(II)-dependent oxygenase superfamily protein; CONTAINS InterPro DOMAIN/s: Oxoglutarate/iron-dependent oxygenase (InterPro:IPR005123); BEST Arabidopsis thaliana protein match is: 2-oxoglutarate (2OG) and Fe(II)-dependent oxygenase superfamily protein (TAIR:AT1G52820.1); Has 5089 Blast hits to 5024 proteins in 625 species: Archae - 0; Bacteria - 336; Metazoa - 25; Fungi -…	gi|15217812|ref|NP_174124.1|	2-oxoglutarate (2OG) and Fe(II)-dependent oxygenase superfamily protein [Arabidopsis thaliana] &gt;gi|12322993|gb|AAG51483.1|AC069471_14 oxidoreductase, putative [Arabidopsis thaliana] &gt;gi|332192783|gb|AEE30904.1| 2-oxoglutarate (2OG) and Fe(II)-dependent oxygenase superfamily protein [Arabidopsis thaliana]
	19833111	chrA01	BnaA01g28670D	19924494	19925747	AT3G15540.1	indole-3-acetic acid inducible 19 (IAA19); FUNCTIONS IN: sequence-specific DNA binding transcription factor activity; INVOLVED IN: phototropism, gravitropism, response to auxin stimulus, response to brassinosteroid stimulus, stamen filament development; LOCATED IN: nucleus; EXPRESSED IN: 22 plant structures; EXPRESSED DURING: 13 growth stages; CONTAINS InterPro DOMAIN/s: Aux/IAA-ARF-dimerisation …	gi|15232612|ref|NP_188173.1|	auxin-responsive protein IAA19 [Arabidopsis thaliana] &gt;gi|17365900|sp|O24409.2|IAA19_ARATH RecName: Full=Auxin-responsive protein IAA19; AltName: Full=Indoleacetic acid-induced protein 19; AltName: Full=Protein MASSUGU 2 &gt;gi|7021739|gb|AAF35420.1| early auxin-induced protein, IAA19 [Arabidopsis thaliana] &gt;gi|15795119|dbj|BAB02383.1| auxin-regulated protein, IAA19 [Arabidopsis thaliana] &…
	19833111	chrA01	BnaA01g28680D	19935623	19935940	AT1G52857.1	unknown protein; FUNCTIONS IN: molecular_function unknown; INVOLVED IN: biological_process unknown; LOCATED IN: cellular_component unknown; Has 2 Blast hits to 2 proteins in 1 species: Archae - 0; Bacteria - 0; Metazoa - 0; Fungi - 0; Plants - 2; Viruses - 0; Other Eukaryotes - 0 (source: NCBI BLink).	gi|145324919|ref|NP_001077706.1|	uncharacterized protein [Arabidopsis thaliana] &gt;gi|98961691|gb|ABF59175.1| unknown protein [Arabidopsis thaliana] &gt;gi|332194738|gb|AEE32859.1| uncharacterized protein AT1G52857 [Arabidopsis thaliana]
Bn-A02-p11772983	8480672	chrA02	BnaA02g14720D	8364802	8367129	AT1G69970.2	CLAVATA3/ESR-RELATED 26 (CLE26); Has 30201 Blast hits to 17322 proteins in 780 species: Archae - 12; Bacteria - 1396; Metazoa - 17338; Fungi - 3422; Plants - 5037; Viruses - 0; Other Eukaryotes - 2996 (source: NCBI BLink).	gi|186494291|ref|NP_001117575.1|	CLAVATA3/ESR (CLE)-related protein 26 [Arabidopsis thaliana] &gt;gi|332196883|gb|AEE35004.1| CLAVATA3/ESR (CLE)-related protein 26 [Arabidopsis thaliana]
	8480672	chrA02	BnaA02g14730D	8397370	8398330	AT1G24190.2	SIN3-like 3 (SNL3); FUNCTIONS IN: transcription repressor activity; INVOLVED IN: negative regulation of transcription, regulation of transcription, DNA-dependent, response to abscisic acid stimulus; LOCATED IN: nucleus; EXPRESSED IN: 22 plant structures; EXPRESSED DURING: 13 growth stages; CONTAINS InterPro DOMAIN/s: Histone deacetylase interacting (InterPro:IPR013194), Paired amphipathic helix (…	gi|587885896|gb|EXB74740.1|	Paired amphipathic helix protein Sin3-like 4 [Morus notabilis]
	8480672	chrA02	BnaA02g14740D	8410510	8414187	AT1G70060.1	SIN3-like 4 (SNL4); INVOLVED IN: regulation of transcription, DNA-dependent; LOCATED IN: nucleus; EXPRESSED IN: 22 plant structures; EXPRESSED DURING: 13 growth stages; CONTAINS InterPro DOMAIN/s: Histone deacetylase interacting (InterPro:IPR013194), Paired amphipathic helix (InterPro:IPR003822); BEST Arabidopsis thaliana protein match is: SIN3-like 3 (TAIR:AT1G24190.2); Has 2571 Blast hits to 11…	gi|297838781|ref|XP_002887272.1|	paired amphipathic helix repeat-containing protein [Arabidopsis lyrata subsp. lyrata] &gt;gi|297333113|gb|EFH63531.1| paired amphipathic helix repeat-containing protein [Arabidopsis lyrata subsp. lyrata]
	8480672	chrA02	BnaA02g14750D	8417406	8418003	AT1G70040.1	Protein of unknown function (DUF1163); FUNCTIONS IN: molecular_function unknown; INVOLVED IN: biological_process unknown; LOCATED IN: endomembrane system; CONTAINS InterPro DOMAIN/s: Protein of unknown function DUF1163 (InterPro:IPR009544); BEST Arabidopsis thaliana protein match is: Protein of unknown function (DUF1163) (TAIR:AT1G70120.1); Has 41 Blast hits to 41 proteins in 2 species: Archae - …	gi|116831009|gb|ABK28460.1|	unknown [Arabidopsis thaliana]		60725
	8480672	chrA02	BnaA02g14760D	8419947	8422329	AT1G70160.1	unknown protein; FUNCTIONS IN: molecular_function unknown; INVOLVED IN: biological_process unknown; LOCATED IN: endomembrane system; EXPRESSED IN: 24 plant structures; EXPRESSED DURING: 15 growth stages; BEST Arabidopsis thaliana protein match is: unknown protein (TAIR:AT4G27020.1); Has 108 Blast hits to 108 proteins in 20 species: Archae - 0; Bacteria - 0; Metazoa - 0; Fungi - 0; Plants - 89; Vi…	gi|18409461|ref|NP_564985.1|	uncharacterized protein [Arabidopsis thaliana] &gt;gi|13430576|gb|AAK25910.1|AF360200_1 unknown protein [Arabidopsis thaliana] &gt;gi|15293161|gb|AAK93691.1| unknown protein [Arabidopsis thaliana] &gt;gi|332196905|gb|AEE35026.1| uncharacterized protein AT1G70160 [Arabidopsis thaliana]
	8480672	chrA02	BnaA02g14770D	8447609	8449150	AT1G24050.1	RNA-processing, Lsm domain; CONTAINS InterPro DOMAIN/s: RNA-processing, Lsm domain (InterPro:IPR019181); BEST Arabidopsis thaliana protein match is: RNA-processing, Lsm domain (TAIR:AT1G70220.1); Has 228 Blast hits to 228 proteins in 109 species: Archae - 0; Bacteria - 0; Metazoa - 90; Fungi - 53; Plants - 56; Viruses - 0; Other Eukaryotes - 29 (source: NCBI BLink).	gi|9369397|gb|AAF87145.1|AC002423_10	T23E23.20 [Arabidopsis thaliana]
	8480672	chrA02	BnaA02g14780D	8452392	8454564	AT1G70260.1	nodulin MtN21 /EamA-like transporter family protein; FUNCTIONS IN: molecular_function unknown; LOCATED IN: endomembrane system, membrane; CONTAINS InterPro DOMAIN/s: Protein of unknown function DUF6, transmembrane (InterPro:IPR000620); BEST Arabidopsis thaliana protein match is: Nodulin MtN21 /EamA-like transporter family protein (TAIR:AT1G60050.1); Has 1237 Blast hits to 1229 proteins in 44 spec…	gi|42563104|ref|NP_177183.2|	nodulin MtN21-like transporter UMAMIT36 [Arabidopsis thaliana] &gt;gi|460425434|sp|F4I5D5.1|WTR11_ARATH RecName: Full=WAT1-related protein At1g70260 &gt;gi|332196917|gb|AEE35038.1| nodulin MtN21-like transporter UMAMIT36 [Arabidopsis thaliana]
	8480672	chrA02	BnaA02g14790D	8464985	8468785	AT1G70290.1	trehalose-6-phosphatase synthase S8 (TPS8); FUNCTIONS IN: transferase activity, transferring glycosyl groups; INVOLVED IN: trehalose biosynthetic process, metabolic process; EXPRESSED IN: 26 plant structures; EXPRESSED DURING: 13 growth stages; CONTAINS InterPro DOMAIN/s: HAD-superfamily hydrolase, subfamily IIB (InterPro:IPR006379), Glycosyl transferase, family 20 (InterPro:IPR001830), Trehalose…	gi|30698024|ref|NP_177186.2|	putative alpha,alpha-trehalose-phosphate synthase [UDP-forming] 8 [Arabidopsis thaliana] &gt;gi|122236328|sp|Q0WUI9.1|TPS8_ARATH RecName: Full=Probable alpha,alpha-trehalose-phosphate synthase [UDP-forming] 8; AltName: Full=Trehalose-6-phosphate synthase 8; Short=AtTPS8 &gt;gi|110742591|dbj|BAE99209.1| putative trehalose-6-phosphate synthase [Arabidopsis thaliana] &gt;gi|332196921|gb|AEE35042.1| …
	8480672	chrA02	BnaA02g14800D	8475325	8491993	AT1G56130.1	Leucine-rich repeat transmembrane protein kinase; FUNCTIONS IN: protein serine/threonine kinase activity, protein kinase activity, ATP binding; INVOLVED IN: protein amino acid phosphorylation; LOCATED IN: plasma membrane, membrane; EXPRESSED IN: cultured cell; CONTAINS InterPro DOMAIN/s: Serine/threonine-protein kinase domain (InterPro:IPR002290), Leucine-rich repeat (InterPro:IPR001611), Serine-…	gi|12321749|gb|AAG50909.1|AC069159_10	receptor protein kinase, putative [Arabidopsis thaliana]
	8480672	chrA02	BnaA02g14810D	8492944	8493309	AT1G70300.1	K+ uptake permease 6 (KUP6); FUNCTIONS IN: potassium ion transmembrane transporter activity; INVOLVED IN: potassium ion transport; LOCATED IN: plasma membrane; EXPRESSED IN: 22 plant structures; EXPRESSED DURING: 14 growth stages; CONTAINS InterPro DOMAIN/s: Potassium uptake protein, kup (InterPro:IPR018519), K+ potassium transporter (InterPro:IPR003855); BEST Arabidopsis thaliana protein match i…	gi|3176686|gb|AAC18809.1|	Similar to high affinity potassium transporter, HAK1 protein gb|U22945 from Schwanniomyces occidentalis [Arabidopsis thaliana]
	8480672	chrA02	BnaA02g14820D	8493362	8497193	AT1G70300.1	K+ uptake permease 6 (KUP6); FUNCTIONS IN: potassium ion transmembrane transporter activity; INVOLVED IN: potassium ion transport; LOCATED IN: plasma membrane; EXPRESSED IN: 22 plant structures; EXPRESSED DURING: 14 growth stages; CONTAINS InterPro DOMAIN/s: Potassium uptake protein, kup (InterPro:IPR018519), K+ potassium transporter (InterPro:IPR003855); BEST Arabidopsis thaliana protein match i…	gi|22330543|ref|NP_177187.2|	potassium transporter 6 [Arabidopsis thaliana] &gt;gi|38503100|sp|Q8W4I4.1|POT6_ARATH RecName: Full=Potassium transporter 6; Short=AtHAK6; Short=AtPOT6 &gt;gi|17064932|gb|AAL32620.1| Similar to high affinity potassium transporter [Arabidopsis thaliana] &gt;gi|20259960|gb|AAM13327.1| similar to high affinity potassium transporter [Arabidopsis thaliana] &gt;gi|332196922|gb|AEE35043.1| potassium tra…
	8480672	chrA02	BnaA02g14830D	8506084	8507929	AT1G70330.1	equilibrative nucleotide transporter 1 (ENT1); FUNCTIONS IN: nucleoside transmembrane transporter activity, against a concentration gradient, nucleoside transmembrane transporter activity; INVOLVED IN: transport; LOCATED IN: plasma membrane; EXPRESSED IN: 25 plant structures; EXPRESSED DURING: 15 growth stages; CONTAINS InterPro DOMAIN/s: Delayed-early response protein/equilibrative nucleoside tr…	gi|3176684|gb|AAC18807.1|	Contains similarity to equilibratiave nucleoside transporter 1 gb|U81375 from Homo sapiens. ESTs gb|N65317, gb|T20785, gb|AA586285 and gb|AA712578 come from this gene [Arabidopsis thaliana]
	8480672	chrA02	BnaA02g14840D	8508910	8509961	AT1G70350.1	unknown protein; Has 98 Blast hits to 98 proteins in 11 species: Archae - 0; Bacteria - 0; Metazoa - 0; Fungi - 0; Plants - 98; Viruses - 0; Other Eukaryotes - 0 (source: NCBI BLink).	gi|3176681|gb|AAC18804.1|	F17O7.11 [Arabidopsis thaliana]		-25412
	8480672	chrA02	BnaA02g14850D	8511296	8515384	AT1G70410.2	beta carbonic anhydrase 4 (BCA4); FUNCTIONS IN: carbonate dehydratase activity, zinc ion binding; INVOLVED IN: response to carbon dioxide, carbon utilization, regulation of stomatal movement; LOCATED IN: plasma membrane, chloroplast envelope; EXPRESSED IN: 25 plant structures; EXPRESSED DURING: 12 growth stages; CONTAINS InterPro DOMAIN/s: Carbonic anhydrase, prokaryotic-like, conserved site (Int…	gi|15223141|ref|NP_177198.1|	beta carbonic anhydrase 4 [Arabidopsis thaliana] &gt;gi|14334470|gb|AAK59433.1| putative carbonic anhydrase [Arabidopsis thaliana] &gt;gi|21281000|gb|AAM44970.1| putative carbonic anhydrase [Arabidopsis thaliana] &gt;gi|332196938|gb|AEE35059.1| beta carbonic anhydrase 4 [Arabidopsis thaliana]
	8480672	chrA02	BnaA02g14860D	8518344	8519224	AT1G70420.1	Protein of unknown function (DUF1645); CONTAINS InterPro DOMAIN/s: Protein of unknown function DUF1645 (InterPro:IPR012442); BEST Arabidopsis thaliana protein match is: Protein of unknown function (DUF1645) (TAIR:AT1G23710.1); Has 179 Blast hits to 179 proteins in 22 species: Archae - 0; Bacteria - 0; Metazoa - 9; Fungi - 0; Plants - 162; Viruses - 0; Other Eukaryotes - 8 (source: NCBI BLink).	gi|18409540|ref|NP_564988.1|	uncharacterized protein [Arabidopsis thaliana] &gt;gi|3176675|gb|AAC18798.1| F17O7.4 [Arabidopsis thaliana] &gt;gi|15010576|gb|AAK73947.1| At1g70420/F17O7_4 [Arabidopsis thaliana] &gt;gi|21700801|gb|AAM70524.1| At1g70420/F17O7_4 [Arabidopsis thaliana] &gt;gi|332196939|gb|AEE35060.1| uncharacterized protein AT1G70420 [Arabidopsis thaliana]
	8480672	chrA02	BnaA02g14870D	8527040	8530657	AT1G70430.1	Protein kinase superfamily protein; FUNCTIONS IN: protein serine/threonine kinase activity, protein kinase activity, kinase activity, ATP binding; INVOLVED IN: protein amino acid phosphorylation; LOCATED IN: cellular_component unknown; EXPRESSED IN: 8 plant structures; EXPRESSED DURING: L mature pollen stage, M germinated pollen stage, 4 anthesis, petal differentiation and expansion stage; CONTAI…	gi|297838837|ref|XP_002887300.1|	kinase family protein [Arabidopsis lyrata subsp. lyrata] &gt;gi|297333141|gb|EFH63559.1| kinase family protein [Arabidopsis lyrata subsp. lyrata]
	8480672	chrA02	BnaA02g14880D	8531925	8534875	AT1G70460.1	root hair specific 10 (RHS10); FUNCTIONS IN: protein serine/threonine kinase activity, protein kinase activity, ATP binding; INVOLVED IN: protein amino acid phosphorylation; LOCATED IN: membrane; EXPRESSED IN: root hair, root; CONTAINS InterPro DOMAIN/s: Protein kinase, ATP binding site (InterPro:IPR017441), Protein kinase, catalytic domain (InterPro:IPR000719), Serine-threonine/tyrosine-protein …	gi|15223161|ref|NP_177203.1|	proline-rich extensin-like receptor kinase 13 [Arabidopsis thaliana] &gt;gi|75333660|sp|Q9CAL8.1|PEK13_ARATH RecName: Full=Proline-rich receptor-like protein kinase PERK13; AltName: Full=Proline-rich extensin-like receptor kinase 13; Short=AtPERK13; AltName: Full=Protein ROOT HAIR SPECIFIC 10 &gt;gi|12325052|gb|AAG52479.1|AC010796_18 putative protein kinase; 6068-8907 [Arabidopsis thaliana] &gt;g…
	8480672	chrA02	BnaA02g14890D	8535226	8535730	AT1G70470.1	unknown protein; BEST Arabidopsis thaliana protein match is: unknown protein (TAIR:AT1G23530.1); Has 64 Blast hits to 64 proteins in 22 species: Archae - 0; Bacteria - 2; Metazoa - 7; Fungi - 10; Plants - 43; Viruses - 0; Other Eukaryotes - 2 (source: NCBI BLink).	gi|15220783|ref|NP_173767.1|	uncharacterized protein [Arabidopsis thaliana] &gt;gi|8778581|gb|AAF79589.1|AC007945_9 F28C11.16 [Arabidopsis thaliana] &gt;gi|4056436|gb|AAC98009.1| EST gb|AA650912 comes from this gene [Arabidopsis thaliana] &gt;gi|34365603|gb|AAQ65113.1| At1g23530 [Arabidopsis thaliana] &gt;gi|51969024|dbj|BAD43204.1| unknown protein [Arabidopsis thaliana] &gt;gi|332192279|gb|AEE30400.1| uncharacterized protei…
	8480672	chrA02	BnaA02g14900D	8537636	8538980	AT1G70490.2	ARFA1D; FUNCTIONS IN: phospholipase activator activity, GTP binding; INVOLVED IN: N-terminal protein myristoylation; LOCATED IN: plasma membrane, vacuole; EXPRESSED IN: 26 plant structures; EXPRESSED DURING: 15 growth stages; CONTAINS InterPro DOMAIN/s: ADP-ribosylation factor (InterPro:IPR006688), Small GTP-binding protein (InterPro:IPR005225), ARF/SAR superfamily (InterPro:IPR006689); BEST Arab…	gi|30681825|ref|NP_172533.2|	ADP-ribosylation factor A1F [Arabidopsis thaliana] &gt;gi|48310130|gb|AAT41759.1| At1g10630 [Arabidopsis thaliana] &gt;gi|50198855|gb|AAT70455.1| At1g10630 [Arabidopsis thaliana] &gt;gi|110740724|dbj|BAE98462.1| similar to ADP-ribosylation factor gb|AAD17207 [Arabidopsis thaliana] &gt;gi|332190490|gb|AEE28611.1| ADP-ribosylation factor A1F [Arabidopsis thaliana]
	8480672	chrA02	BnaA02g14910D	8543406	8544789	AT3G29670.1	HXXXD-type acyl-transferase family protein; FUNCTIONS IN: transferase activity, transferring acyl groups other than amino-acyl groups, transferase activity; INVOLVED IN: biological_process unknown; LOCATED IN: cellular_component unknown; EXPRESSED IN: stem, inflorescence meristem, hypocotyl, flower; EXPRESSED DURING: petal differentiation and expansion stage; CONTAINS InterPro DOMAIN/s: Transfera…	gi|297818620|ref|XP_002877193.1|	predicted protein [Arabidopsis lyrata subsp. lyrata] &gt;gi|297323031|gb|EFH53452.1| predicted protein [Arabidopsis lyrata subsp. lyrata]
	8480672	chrA02	BnaA02g14920D	8545260	8546239	AT5G20930.1	TOUSLED (TSL); FUNCTIONS IN: protein serine/threonine kinase activity, kinase activity; INVOLVED IN: protein amino acid phosphorylation; LOCATED IN: nucleus, chloroplast, cytoplasm; EXPRESSED IN: 23 plant structures; EXPRESSED DURING: 14 growth stages; CONTAINS InterPro DOMAIN/s: Protein kinase, ATP binding site (InterPro:IPR017441), Protein kinase, catalytic domain (InterPro:IPR000719), Serine/t…	gi|590586017|ref|XP_007015589.1|	Serine/threonine-protein kinase TOUSLED isoform 3 [Theobroma cacao] &gt;gi|508785952|gb|EOY33208.1| Serine/threonine-protein kinase TOUSLED isoform 3 [Theobroma cacao]
	8480672	chrA02	BnaA02g14930D	8548905	8551288	AT1G70505.1	unknown protein; BEST Arabidopsis thaliana protein match is: unknown protein (TAIR:AT1G10660.1); Has 141 Blast hits to 140 proteins in 16 species: Archae - 0; Bacteria - 0; Metazoa - 4; Fungi - 0; Plants - 135; Viruses - 0; Other Eukaryotes - 2 (source: NCBI BLink).	gi|240254342|ref|NP_683487.4|	uncharacterized protein [Arabidopsis thaliana] &gt;gi|332196951|gb|AEE35072.1| uncharacterized protein AT1G70505 [Arabidopsis thaliana]
	8480672	chrA02	BnaA02g14940D	8551834	8552277	AT1G59730.1	thioredoxin H-type 7 (TH7); INVOLVED IN: N-terminal protein myristoylation, cell redox homeostasis; LOCATED IN: cellular_component unknown; EXPRESSED IN: 8 plant structures; EXPRESSED DURING: 4 anthesis, petal differentiation and expansion stage; CONTAINS InterPro DOMAIN/s: Thioredoxin fold (InterPro:IPR012335), Thioredoxin, core (InterPro:IPR015467), Thioredoxin-like (InterPro:IPR017936), Thiore…	gi|297837565|ref|XP_002886664.1|	thioredoxin H-type 7 [Arabidopsis lyrata subsp. lyrata] &gt;gi|297332505|gb|EFH62923.1| thioredoxin H-type 7 [Arabidopsis lyrata subsp. lyrata]
	8480672	chrA02	BnaA02g14950D	8569078	8574265	AT1G70510.1	KNOTTED-like from Arabidopsis thaliana 2 (KNAT2); FUNCTIONS IN: sequence-specific DNA binding transcription factor activity; INVOLVED IN: response to ethylene stimulus, cytokinin mediated signaling pathway, specification of carpel identity; LOCATED IN: nucleus; EXPRESSED IN: 16 plant structures; EXPRESSED DURING: 6 growth stages; CONTAINS InterPro DOMAIN/s: KNOX2 (InterPro:IPR005541), ELK (InterP…	gi|984046|emb|CAA57122.1|	ATK1 [Arabidopsis thaliana] &gt;gi|984048|emb|CAA57121.1| ATK1 [Arabidopsis thaliana]
	8480672	chrA02	BnaA02g14960D	8576813	8579359	AT1G70520.1	cysteine-rich RLK (RECEPTOR-like protein kinase) 2 (CRK2); FUNCTIONS IN: kinase activity; INVOLVED IN: response to ozone; LOCATED IN: plasma membrane; EXPRESSED IN: 23 plant structures; EXPRESSED DURING: 13 growth stages; CONTAINS InterPro DOMAIN/s: Protein kinase, ATP binding site (InterPro:IPR017441), Protein kinase, catalytic domain (InterPro:IPR000719), Protein of unknown function DUF26 (Inte…	gi|297841807|ref|XP_002888785.1|	kinase family protein [Arabidopsis lyrata subsp. lyrata] &gt;gi|297334626|gb|EFH65044.1| kinase family protein [Arabidopsis lyrata subsp. lyrata]
	8480672	chrA02	BnaA02g14970D	8587644	8588145	AT1G70540.1	embryo sac development arrest 24 (EDA24); FUNCTIONS IN: enzyme inhibitor activity, pectinesterase inhibitor activity, pectinesterase activity; INVOLVED IN: polar nucleus fusion; LOCATED IN: endomembrane system; EXPRESSED IN: sepal, male gametophyte, flower, pollen tube; EXPRESSED DURING: L mature pollen stage, M germinated pollen stage, 4 anthesis; CONTAINS InterPro DOMAIN/s: Pectinesterase inhib…	gi|21593787|gb|AAM65754.1|	unknown [Arabidopsis thaliana]
Bn-A05-p6415983	5964030	chrA05	BnaA05g10740D	5858490	5861700	AT3G45040.1	phosphatidate cytidylyltransferase family protein; FUNCTIONS IN: phosphatidate cytidylyltransferase activity, dolichol kinase activity; INVOLVED IN: phospholipid biosynthetic process; LOCATED IN: endomembrane system, membrane; EXPRESSED IN: 24 plant structures; EXPRESSED DURING: 15 growth stages; Has 410 Blast hits to 408 proteins in 217 species: Archae - 14; Bacteria - 44; Metazoa - 111; Fungi -…	gi|22331608|ref|NP_190090.2|	putative dolichol kinase [Arabidopsis thaliana] &gt;gi|332644461|gb|AEE77982.1| putative dolichol kinase [Arabidopsis thaliana]
			BnaA05g10750D	5866263	5869104	AT2G32260.1	phosphorylcholine cytidylyltransferase (CCT1); CONTAINS InterPro DOMAIN/s: Rossmann-like alpha/beta/alpha sandwich fold (InterPro:IPR014729), Cytidyltransferase-related (InterPro:IPR004821), Cytidylyltransferase (InterPro:IPR004820); BEST Arabidopsis thaliana protein match is: phosphorylcholine cytidylyltransferase2 (TAIR:AT4G15130.1); Has 2466 Blast hits to 2109 proteins in 632 species: Archae -…	gi|1418127|dbj|BAA09642.1|	CTP:phosphocholine cytidylyltransferase [Brassica napus]
			BnaA05g10760D	5878626	5880816	AT2G32270.1	zinc transporter 3 precursor (ZIP3); FUNCTIONS IN: zinc ion transmembrane transporter activity; INVOLVED IN: zinc ion transport; LOCATED IN: endomembrane system, integral to membrane, membrane; EXPRESSED IN: root; CONTAINS InterPro DOMAIN/s: Zinc/iron permease, fungal/plant (InterPro:IPR004698), Zinc/iron permease (InterPro:IPR003689); BEST Arabidopsis thaliana protein match is: zinc transporter …	gi|15225219|ref|NP_180786.1|	zinc transporter 3 [Arabidopsis thaliana] &gt;gi|37090485|sp|Q9SLG3.1|ZIP3_ARATH RecName: Full=Zinc transporter 3; AltName: Full=ZRT/IRT-like protein 3; Flags: Precursor &gt;gi|3831472|gb|AAC69954.1| putative Fe(II) transporter [Arabidopsis thaliana] &gt;gi|330253566|gb|AEC08660.1| zinc transporter 3 [Arabidopsis thaliana]
			BnaA05g10770D	5900376	5901530	AT2G32280.1	Protein of unknown function (DUF1218); FUNCTIONS IN: molecular_function unknown; INVOLVED IN: biological_process unknown; LOCATED IN: endomembrane system; EXPRESSED IN: 18 plant structures; EXPRESSED DURING: 9 growth stages; CONTAINS InterPro DOMAIN/s: Protein of unknown function DUF1218 (InterPro:IPR009606); BEST Arabidopsis thaliana protein match is: Protein of unknown function (DUF1218) (TAIR:…	gi|502083120|ref|XP_004487365.1|	PREDICTED: uncharacterized protein LOC101491166 [Cicer arietinum]
			BnaA05g10780D	5901745	5904264	AT2G32290.1	beta-amylase 6 (BAM6); FUNCTIONS IN: cation binding, beta-amylase activity, catalytic activity; INVOLVED IN: cellulose biosynthetic process, carbohydrate metabolic process, polysaccharide catabolic process; LOCATED IN: chloroplast; EXPRESSED IN: 14 plant structures; EXPRESSED DURING: 8 growth stages; CONTAINS InterPro DOMAIN/s: Glycoside hydrolase, family 14, conserved site (InterPro:IPR018238), …	gi|297826673|ref|XP_002881219.1|	beta-amylase 5 [Arabidopsis lyrata subsp. lyrata] &gt;gi|297327058|gb|EFH57478.1| beta-amylase 5 [Arabidopsis lyrata subsp. lyrata]
			BnaA05g10790D	5907729	5908740	AT2G32300.1	uclacyanin 1 (UCC1); FUNCTIONS IN: electron carrier activity, copper ion binding; LOCATED IN: anchored to membrane; EXPRESSED IN: 7 plant structures; EXPRESSED DURING: F mature embryo stage, petal differentiation and expansion stage, D bilateral stage; CONTAINS InterPro DOMAIN/s: Plastocyanin-like (InterPro:IPR003245), Cupredoxin (InterPro:IPR008972), Blue (type 1) copper domain (InterPro:IPR0009…	gi|15225223|ref|NP_180789.1|	uclacyanin 1 [Arabidopsis thaliana] &gt;gi|3399767|gb|AAC32038.1| uclacyanin I [Arabidopsis thaliana] &gt;gi|3831466|gb|AAC69948.1| putative uclacyanin I [Arabidopsis thaliana] &gt;gi|330253571|gb|AEC08665.1| uclacyanin 1 [Arabidopsis thaliana]
			BnaA05g10800D	5914809	5916632	AT1G05270.1	TraB family protein; CONTAINS InterPro DOMAIN/s: Pheromone shutdown-related, TraB (InterPro:IPR002816); BEST Arabidopsis thaliana protein match is: TraB family protein (TAIR:AT2G32340.1); Has 779 Blast hits to 750 proteins in 262 species: Archae - 153; Bacteria - 256; Metazoa - 121; Fungi - 0; Plants - 106; Viruses - 0; Other Eukaryotes - 143 (source: NCBI BLink).	gi|30679206|ref|NP_172019.3|	TraB family protein [Arabidopsis thaliana] &gt;gi|26450987|dbj|BAC42600.1| unknown protein [Arabidopsis thaliana] &gt;gi|28950927|gb|AAO63387.1| At1g05270 [Arabidopsis thaliana] &gt;gi|51969614|dbj|BAD43499.1| unknown protein [Arabidopsis thaliana] &gt;gi|332189695|gb|AEE27816.1| TraB family protein [Arabidopsis thaliana]
			BnaA05g10810D	5917546	5918340	AT2G32350.1	Ubiquitin-like superfamily protein; CONTAINS InterPro DOMAIN/s: Ubiquitin (InterPro:IPR000626), Ubiquitin supergroup (InterPro:IPR019955); BEST Arabidopsis thaliana protein match is: Ubiquitin-like superfamily protein (TAIR:AT4G05230.1); Has 234 Blast hits to 197 proteins in 60 species: Archae - 0; Bacteria - 0; Metazoa - 37; Fungi - 4; Plants - 98; Viruses - 14; Other Eukaryotes - 81 (source: NC…	gi|145360542|ref|NP_180794.2|	ubiquitin-like superfamily protein [Arabidopsis thaliana] &gt;gi|330253578|gb|AEC08672.1| ubiquitin-like domain-containing protein [Arabidopsis thaliana]
			BnaA05g10820D	5933641	5937108	AT1G05230.3	homeodomain GLABROUS 2 (HDG2); FUNCTIONS IN: DNA binding, sequence-specific DNA binding transcription factor activity; INVOLVED IN: regulation of transcription, DNA-dependent, trichome morphogenesis; LOCATED IN: nucleus; EXPRESSED IN: 32 plant structures; EXPRESSED DURING: 15 growth stages; CONTAINS InterPro DOMAIN/s: Homeobox, conserved site (InterPro:IPR017970), Homeobox (InterPro:IPR001356), H…	gi|568830850|ref|XP_006469697.1|	PREDICTED: homeobox-leucine zipper protein HDG2-like isoform X3 [Citrus sinensis] &gt;gi|568830852|ref|XP_006469698.1| PREDICTED: homeobox-leucine zipper protein HDG2-like isoform X4 [Citrus sinensis]
			BnaA05g10830D	5938096	5941430	AT2G32390.3	glutamate receptor 3.5 (GLR3.5); FUNCTIONS IN: intracellular ligand-gated ion channel activity; INVOLVED IN: cellular calcium ion homeostasis, response to light stimulus; LOCATED IN: integral to membrane, membrane; EXPRESSED IN: 20 plant structures; EXPRESSED DURING: 13 growth stages; CONTAINS InterPro DOMAIN/s: Extracellular solute-binding protein, family 3 (InterPro:IPR001638), Ionotropic gluta…	gi|41017241|sp|Q9SW97.2|GLR35_ARATH	RecName: Full=Glutamate receptor 3.5; AltName: Full=Ionotropic glutamate receptor GLR6; AltName: Full=Ligand-gated ion channel 3.5; Flags: Precursor
			BnaA05g10840D	5942118	5946545	AT2G32400.1	glutamate receptor 5 (GLR5); FUNCTIONS IN: protein binding, intracellular ligand-gated ion channel activity; INVOLVED IN: cellular calcium ion homeostasis, response to light stimulus; LOCATED IN: endomembrane system, integral to membrane, membrane; EXPRESSED IN: 22 plant structures; EXPRESSED DURING: 13 growth stages; CONTAINS InterPro DOMAIN/s: Extracellular solute-binding protein, family 3 (Int…	gi|18402960|ref|NP_565744.1|	glutamate receptor 5 [Arabidopsis thaliana] &gt;gi|41017238|sp|Q9SDQ4.2|GLR37_ARATH RecName: Full=Glutamate receptor 3.7; AltName: Full=Ionotropic glutamate receptor GLR5; AltName: Full=Ligand-gated ion channel 3.7; Flags: Precursor &gt;gi|20197428|gb|AAC69938.2| putative ligand-gated ion channel subunit [Arabidopsis thaliana] &gt;gi|330253585|gb|AEC08679.1| glutamate receptor 5 [Arabidopsis thal…
			BnaA05g10850D	5953158	5956654	AT2G32410.1	AXR1-like (AXL); FUNCTIONS IN: binding, catalytic activity; INVOLVED IN: auxin homeostasis, auxin mediated signaling pathway, post-embryonic development, protein ubiquitination; LOCATED IN: peroxisome; EXPRESSED IN: 23 plant structures; EXPRESSED DURING: 11 growth stages; CONTAINS InterPro DOMAIN/s: UBA/THIF-type NAD/FAD binding fold (InterPro:IPR000594), Molybdenum cofactor biosynthesis, MoeB (I…	gi|312282305|dbj|BAJ34018.1|	unnamed protein product [Thellungiella halophila]
			BnaA05g10860D	5956854	5961077	AT2G32415.1	Polynucleotidyl transferase, ribonuclease H fold protein with HRDC domain; FUNCTIONS IN: 3'-5' exonuclease activity, nucleic acid binding; INVOLVED IN: nucleobase, nucleoside, nucleotide and nucleic acid metabolic process; LOCATED IN: intracellular; EXPRESSED IN: shoot apex, cultured cell; CONTAINS InterPro DOMAIN/s: Polynucleotidyl transferase, ribonuclease H fold (InterPro:IPR012337), Helicase/…	gi|160892403|gb|ABX52081.1|	RRP6-like protein 3 [Arabidopsis thaliana]
			BnaA05g10870D	5961138	5961278	-		-	-
			BnaA05g10880D	5972752	5975866	AT2G32430.1	Galactosyltransferase family protein; FUNCTIONS IN: transferase activity, transferring hexosyl groups, transferase activity, transferring glycosyl groups; INVOLVED IN: protein amino acid glycosylation; LOCATED IN: endomembrane system, membrane; EXPRESSED IN: 22 plant structures; EXPRESSED DURING: 13 growth stages; CONTAINS InterPro DOMAIN/s: Glycosyl transferase, family 31 (InterPro:IPR002659); B…	gi|15225684|ref|NP_180802.1|	putative beta-1,3-galactosyltransferase 3 [Arabidopsis thaliana] &gt;gi|75216919|sp|Q9ZV71.1|B3GT3_ARATH RecName: Full=Probable beta-1,3-galactosyltransferase 3 &gt;gi|3831453|gb|AAC69935.1| unknown protein [Arabidopsis thaliana] &gt;gi|28393502|gb|AAO42172.1| unknown protein [Arabidopsis thaliana] &gt;gi|330253590|gb|AEC08684.1| putative beta-1,3-galactosyltransferase 3 [Arabidopsis thaliana] &g…
			BnaA05g10890D	5976926	5979278	AT2G32440.2	ent-kaurenoic acid hydroxylase 2 (KAO2); CONTAINS InterPro DOMAIN/s: Cytochrome P450, B-class (InterPro:IPR002397), Cytochrome P450 (InterPro:IPR001128), Cytochrome P450, conserved site (InterPro:IPR017972); BEST Arabidopsis thaliana protein match is: cytochrome P450, family 88, subfamily A, polypeptide 3 (TAIR:AT1G05160.1).	gi|15225685|ref|NP_180803.1|	Ent-kaurenoic acid oxidase 2 [Arabidopsis thaliana] &gt;gi|334184636|ref|NP_001189657.1| Ent-kaurenoic acid oxidase 2 [Arabidopsis thaliana] &gt;gi|50401152|sp|Q9C5Y2.2|KAO2_ARATH RecName: Full=Ent-kaurenoic acid oxidase 2; Short=AtKAO2; AltName: Full=Cytochrome P450 88A4 &gt;gi|3831452|gb|AAC69934.1| putative cytochrome P450 [Arabidopsis thaliana] &gt;gi|115646746|gb|ABJ17103.1| At2g32440 [Arabi…
			BnaA05g10900D	5984453	5986682	AT2G32460.1	myb domain protein 101 (MYB101); CONTAINS InterPro DOMAIN/s: SANT, DNA-binding (InterPro:IPR001005), Homeodomain-like (InterPro:IPR009057), Myb, DNA-binding (InterPro:IPR014778), HTH transcriptional regulator, Myb-type, DNA-binding (InterPro:IPR017930), Homeodomain-related (InterPro:IPR012287), Myb transcription factor (InterPro:IPR015495); BEST Arabidopsis thaliana protein match is: myb domain p…	gi|18087349|gb|AAL58845.1|AF411970_1	putative transcription factor MYB101 [Arabidopsis thaliana]
			BnaA05g10910D	5993705	5995208	AT2G32480.1	ARABIDOPSIS SERIN PROTEASE (ARASP); FUNCTIONS IN: metalloendopeptidase activity; INVOLVED IN: proteolysis, chloroplast organization; LOCATED IN: chloroplast, plastid, chloroplast inner membrane; EXPRESSED IN: 24 plant structures; EXPRESSED DURING: 13 growth stages; CONTAINS InterPro DOMAIN/s: Peptidase M50 (InterPro:IPR008915), PDZ/DHR/GLGF (InterPro:IPR001478), Peptidase M50, putative membrane-a…	gi|18402981|ref|NP_565745.1|	serine protease [Arabidopsis thaliana] &gt;gi|14423492|gb|AAK62428.1|AF386983_1 Unknown protein [Arabidopsis thaliana] &gt;gi|3298536|gb|AAC25930.1| expressed protein [Arabidopsis thaliana] &gt;gi|21553979|gb|AAM63060.1| unknown [Arabidopsis thaliana] &gt;gi|30387545|gb|AAP31938.1| At2g32480 [Arabidopsis thaliana] &gt;gi|330253597|gb|AEC08691.1| serine protease [Arabidopsis thaliana]
			BnaA05g10920D	5997440	5998571	AT2G32510.1	mitogen-activated protein kinase kinase kinase 17 (MAPKKK17); FUNCTIONS IN: protein serine/threonine kinase activity, protein kinase activity, kinase activity, ATP binding; INVOLVED IN: protein amino acid phosphorylation; EXPRESSED IN: 7 plant structures; EXPRESSED DURING: 4 anthesis, petal differentiation and expansion stage; CONTAINS InterPro DOMAIN/s: Protein kinase, ATP binding site (InterPro…	gi|430218107|gb|AGA37214.1|	mitogen-activated protein kinase kinase kinase 17.1 [Brassica napus]
			BnaA05g10930D	6102226	6102781	AT2G32020.1	Acyl-CoA N-acyltransferases (NAT) superfamily protein; FUNCTIONS IN: N-acetyltransferase activity; INVOLVED IN: response to abscisic acid stimulus, metabolic process; LOCATED IN: cellular_component unknown; EXPRESSED IN: stem, cotyledon, hypocotyl, root, stamen; EXPRESSED DURING: 4 anthesis, petal differentiation and expansion stage; CONTAINS InterPro DOMAIN/s: GCN5-related N-acetyltransferase, C…	gi|15225172|ref|NP_180762.1|	Acyl-CoA N-acyltransferases (NAT) superfamily protein [Arabidopsis thaliana] &gt;gi|4263716|gb|AAD15402.1| putative alanine acetyl transferase [Arabidopsis thaliana] &gt;gi|89111884|gb|ABD60714.1| At2g32020 [Arabidopsis thaliana] &gt;gi|330253529|gb|AEC08623.1| Acyl-CoA N-acyltransferases (NAT) superfamily protein [Arabidopsis thaliana]
Bn-A05-p15113541	11594569		BnaA05g16760D	11486502	11495035	AT3G22930.1	calmodulin-like 11 (CML11); FUNCTIONS IN: calcium ion binding; INVOLVED IN: biological_process unknown; EXPRESSED IN: 7 plant structures; EXPRESSED DURING: LP.06 six leaves visible, LP.04 four leaves visible, LP.10 ten leaves visible, LP.08 eight leaves visible, LP.12 twelve leaves visible; CONTAINS InterPro DOMAIN/s: EF-Hand 1, calcium-binding site (InterPro:IPR018247), EF-HAND 2 (InterPro:IPR01…	gi|15228905|ref|NP_188933.1|	calmodulin-like protein 11 [Arabidopsis thaliana] &gt;gi|75335042|sp|Q9LIK5.1|CML11_ARATH RecName: Full=Calmodulin-like protein 11 &gt;gi|16226344|gb|AAL16141.1|AF428309_1 AT3g22930/F5N5_10 [Arabidopsis thaliana] &gt;gi|11994722|dbj|BAB03038.1| unnamed protein product [Arabidopsis thaliana] &gt;gi|21436047|gb|AAM51601.1| AT3g22930/F5N5_10 [Arabidopsis thaliana] &gt;gi|332643171|gb|AEE76692.1| cal…
			BnaA05g16770D	11498714	11499624	AT1G31150.1	FUNCTIONS IN: sequence-specific DNA binding transcription factor activity; INVOLVED IN: regulation of transcription, DNA-dependent; LOCATED IN: nucleus; EXPRESSED IN: 19 plant structures; EXPRESSED DURING: 6 growth stages; CONTAINS InterPro DOMAIN/s: Domain of unknown function DUF1985 (InterPro:IPR015410), Transcription factor, K-box (InterPro:IPR002487); BEST Arabidopsis thaliana protein match i…	gi|12322426|gb|AAG51237.1|AC035249_12	unknown protein; 55998-51558 [Arabidopsis thaliana]
			BnaA05g16780D	11499698	11500355	AT1G31150.1	FUNCTIONS IN: sequence-specific DNA binding transcription factor activity; INVOLVED IN: regulation of transcription, DNA-dependent; LOCATED IN: nucleus; EXPRESSED IN: 19 plant structures; EXPRESSED DURING: 6 growth stages; CONTAINS InterPro DOMAIN/s: Domain of unknown function DUF1985 (InterPro:IPR015410), Transcription factor, K-box (InterPro:IPR002487); BEST Arabidopsis thaliana protein match i…	gi|7529242|emb|CAB86472.1|	putative protein [Arabidopsis thaliana]
			BnaA05g16790D	11500591	11503127	AT2G07240.1	cysteine-type peptidases;cysteine-type peptidases; FUNCTIONS IN: cysteine-type peptidase activity; INVOLVED IN: proteolysis; LOCATED IN: cellular_component unknown; CONTAINS InterPro DOMAIN/s: Domain of unknown function DUF1985 (InterPro:IPR015410), Peptidase C48, SUMO/Sentrin/Ubl1 (InterPro:IPR003653); Has 30201 Blast hits to 17322 proteins in 780 species: Archae - 12; Bacteria - 1396; Metazoa -…	gi|9758807|dbj|BAB09260.1|	unnamed protein product [Arabidopsis thaliana]
			BnaA05g16800D	11503850	11504467	AT4G04775.1	zinc ion binding; FUNCTIONS IN: zinc ion binding; CONTAINS InterPro DOMAIN/s: Zinc finger, GRF-type (InterPro:IPR010666); BEST Arabidopsis thaliana protein match is: zinc ion binding (TAIR:AT5G15690.1).	gi|334186356|ref|NP_001190673.1|	zinc ion binding protein [Arabidopsis thaliana] &gt;gi|332657024|gb|AEE82424.1| zinc ion binding protein [Arabidopsis thaliana]
			BnaA05g16810D	11505062	11505506	-		gi|4309755|gb|AAD15524.1|	Mutator-like transposase [Arabidopsis thaliana]				62513
			BnaA05g16820D	11527976	11531021	AT3G22910.1	ATPase E1-E2 type family protein / haloacid dehalogenase-like hydrolase family protein; FUNCTIONS IN: calcium-transporting ATPase activity, calmodulin binding; INVOLVED IN: cation transport, calcium ion transport, metabolic process, ATP biosynthetic process; LOCATED IN: membrane; EXPRESSED IN: 12 plant structures; EXPRESSED DURING: LP.04 four leaves visible, 4 anthesis, C globular stage, petal di…	gi|15228891|ref|NP_188931.1|	putative calcium-transporting ATPase 13 [Arabidopsis thaliana] &gt;gi|12229654|sp|Q9LIK7.1|ACA13_ARATH RecName: Full=Putative calcium-transporting ATPase 13, plasma membrane-type; AltName: Full=Ca(2+)-ATPase isoform 13 &gt;gi|11994720|dbj|BAB03036.1| Ca2+-transporting ATPase-like protein [Arabidopsis thaliana] &gt;gi|332643169|gb|AEE76690.1| putative calcium-transporting ATPase 13 [Arabidopsis th…
			BnaA05g16830D	11532056	11534683	AT3G22890.1	ATP sulfurylase 1 (APS1); FUNCTIONS IN: sulfate adenylyltransferase (ATP) activity; INVOLVED IN: response to cadmium ion, response to salt stress; LOCATED IN: chloroplast, plasma membrane, chloroplast stroma; EXPRESSED IN: 24 plant structures; EXPRESSED DURING: 15 growth stages; CONTAINS InterPro DOMAIN/s: Rossmann-like alpha/beta/alpha sandwich fold (InterPro:IPR014729), Pseudouridine synthase/a…	gi|164498974|gb|ABY59052.1|	chloroplast ATP sulfurylase 1 precursor [Brassica oleracea]
			BnaA05g16840D	11582126	11583287	AT1G46984.1	F-box family protein; CONTAINS InterPro DOMAIN/s: F-box domain, cyclin-like (InterPro:IPR001810), F-box domain, Skp2-like (InterPro:IPR022364), F-box associated domain, type 3 (InterPro:IPR013187), F-box associated interaction domain (InterPro:IPR017451); BEST Arabidopsis thaliana protein match is: F-box family protein (TAIR:AT1G46840.1); Has 1475 Blast hits to 1405 proteins in 42 species: Archae…	gi|15229145|ref|NP_190514.1|	F-box protein [Arabidopsis thaliana] &gt;gi|75337046|sp|Q9SCL2.1|FB197_ARATH RecName: Full=F-box protein At3g49450 &gt;gi|6561946|emb|CAB62450.1| putative protein [Arabidopsis thaliana] &gt;gi|67633684|gb|AAY78766.1| F-box family protein [Arabidopsis thaliana] &gt;gi|332645024|gb|AEE78545.1| F-box protein [Arabidopsis thaliana]
			BnaA05g16850D	11583697	11585289	AT3G22845.1	emp24/gp25L/p24 family/GOLD family protein; INVOLVED IN: transport; LOCATED IN: vacuole; EXPRESSED IN: 24 plant structures; EXPRESSED DURING: 15 growth stages; CONTAINS InterPro DOMAIN/s: GOLD (InterPro:IPR009038), emp24/gp25L/p24 (InterPro:IPR000348); BEST Arabidopsis thaliana protein match is: emp24/gp25L/p24 family/GOLD family protein (TAIR:AT3G07680.1); Has 1821 Blast hits to 1821 proteins in…	gi|42565125|ref|NP_188924.3|	transmembrane emp24 domain-containing protein p24beta3 [Arabidopsis thaliana] &gt;gi|75273406|sp|Q9LIL4.1|P24B3_ARATH RecName: Full=Transmembrane emp24 domain-containing protein p24beta3; AltName: Full=p24 family protein beta2; Short=p24beta2; AltName: Full=p24 family protein beta3; Short=p24beta3; Flags: Precursor &gt;gi|11994713|dbj|BAB03029.1| coated vesicle membrane protein-like [Arabidopsis …
			BnaA05g16860D	11607310	11608604	AT3G22840.1	EARLY LIGHT-INDUCABLE PROTEIN (ELIP1); BEST Arabidopsis thaliana protein match is: Chlorophyll A-B binding family protein (TAIR:AT4G14690.1); Has 319 Blast hits to 319 proteins in 50 species: Archae - 0; Bacteria - 5; Metazoa - 0; Fungi - 0; Plants - 259; Viruses - 0; Other Eukaryotes - 55 (source: NCBI BLink).	gi|38123375|gb|AAR11456.1|	ELIP [Brassica rapa subsp. pekinensis]
			BnaA05g16870D	11609992	11611337	-		gi|567205156|ref|XP_006408674.1|	hypothetical protein EUTSA_v10002234mg [Eutrema salsugineum] &gt;gi|557109830|gb|ESQ50127.1| hypothetical protein EUTSA_v10002234mg [Eutrema salsugineum]
			BnaA05g16880D	11618771	11620931	AT3G22830.1	heat shock transcription factor A6B (HSFA6B); FUNCTIONS IN: DNA binding, sequence-specific DNA binding transcription factor activity; INVOLVED IN: regulation of transcription, DNA-dependent; LOCATED IN: nucleus; EXPRESSED IN: root; CONTAINS InterPro DOMAIN/s: Winged helix-turn-helix transcription repressor DNA-binding (InterPro:IPR011991), Heat shock factor (HSF)-type, DNA-binding (InterPro:IPR00…	gi|15228865|ref|NP_188922.1|	heat stress transcription factor A-6b [Arabidopsis thaliana] &gt;gi|75311595|sp|Q9LUH8.1|HFA6B_ARATH RecName: Full=Heat stress transcription factor A-6b; Short=AtHsfA6b; AltName: Full=AtHsf-07 &gt;gi|9279701|dbj|BAB01258.1| heat shock transcription factor-like protein [Arabidopsis thaliana] &gt;gi|15028343|gb|AAK76648.1| putative heat shock protein [Arabidopsis thaliana] &gt;gi|19310749|gb|AAL851…
			BnaA05g16890D	11657453	11658926	AT3G22800.1	Leucine-rich repeat (LRR) family protein; FUNCTIONS IN: structural constituent of cell wall; LOCATED IN: endomembrane system; EXPRESSED IN: 8 plant structures; EXPRESSED DURING: petal differentiation and expansion stage; CONTAINS InterPro DOMAIN/s: Leucine-rich repeat-containing N-terminal domain, type 2 (InterPro:IPR013210), Leucine-rich repeat (InterPro:IPR001611); BEST Arabidopsis thaliana pro…	gi|15228861|ref|NP_188919.1|	leucine-rich repeat extensin-like protein 6 [Arabidopsis thaliana] &gt;gi|75335502|sp|Q9LUI1.1|LRX6_ARATH RecName: Full=Leucine-rich repeat extensin-like protein 6; Short=AtLRX6; Short=LRR/EXTENSIN6; AltName: Full=Cell wall hydroxyproline-rich glycoprotein; Flags: Precursor &gt;gi|9279698|dbj|BAB01255.1| extensin protein-like [Arabidopsis thaliana] &gt;gi|219291096|gb|ACL13984.1| At3g22800 [Arabi…
			BnaA05g16900D	11667635	11671458	AT3G21910.1	Domain of unknown function (DUF26); FUNCTIONS IN: molecular_function unknown; INVOLVED IN: biological_process unknown; LOCATED IN: endomembrane system; CONTAINS InterPro DOMAIN/s: Protein of unknown function DUF26 (InterPro:IPR002902); BEST Arabidopsis thaliana protein match is: Domain of unknown function (DUF26) (TAIR:AT3G21930.1); Has 1371 Blast hits to 1340 proteins in 20 species: Archae - 0; …	gi|15233201|ref|NP_188829.1|	putative cysteine-rich repeat secretory protein 17 [Arabidopsis thaliana] &gt;gi|75273781|sp|Q9LRM2.1|CRR17_ARATH RecName: Full=Putative cysteine-rich repeat secretory protein 17; Flags: Precursor &gt;gi|9279742|dbj|BAB01368.1| unnamed protein product [Arabidopsis thaliana] &gt;gi|332643044|gb|AEE76565.1| putative cysteine-rich repeat secretory protein 17 [Arabidopsis thaliana]
			BnaA05g16910D	11687857	11689126	AT3G60960.1	Tetratricopeptide repeat (TPR)-like superfamily protein; CONTAINS InterPro DOMAIN/s: Pentatricopeptide repeat (InterPro:IPR002885); BEST Arabidopsis thaliana protein match is: Tetratricopeptide repeat (TPR)-like superfamily protein (TAIR:AT5G28380.1); Has 6360 Blast hits to 3266 proteins in 90 species: Archae - 0; Bacteria - 0; Metazoa - 0; Fungi - 2; Plants - 6335; Viruses - 0; Other Eukaryotes …	gi|42566102|ref|NP_191655.2|	pentatricopeptide repeat-containing protein [Arabidopsis thaliana] &gt;gi|218525904|sp|Q9LEX6.2|PP289_ARATH RecName: Full=Pentatricopeptide repeat-containing protein At3g60960, mitochondrial; Flags: Precursor &gt;gi|332646609|gb|AEE80130.1| pentatricopeptide repeat-containing protein [Arabidopsis thaliana]
			BnaA05g16920D	11698929	11705270	AT3G22790.1	Kinase interacting (KIP1-like) family protein; FUNCTIONS IN: molecular_function unknown; INVOLVED IN: biological_process unknown; LOCATED IN: plasma membrane; EXPRESSED IN: 20 plant structures; EXPRESSED DURING: 13 growth stages; CONTAINS InterPro DOMAIN/s: KIP1-like (InterPro:IPR011684); BEST Arabidopsis thaliana protein match is: kinase interacting (KIP1-like) family protein (TAIR:AT4G14760.1);…	gi|334185553|ref|NP_188918.2|	protein NETWORKED 1A [Arabidopsis thaliana] &gt;gi|9279697|dbj|BAB01254.1| centromere protein [Arabidopsis thaliana] &gt;gi|332643156|gb|AEE76677.1| Kinase interacting (KIP1-like) family protein [Arabidopsis thaliana]
seq-new-rs37128	16647352		BnaA05g21440D	16542887	16543377	AT1G80470.1	F-box/RNI-like/FBD-like domains-containing protein; CONTAINS InterPro DOMAIN/s: F-box domain, cyclin-like (InterPro:IPR001810), FBD (InterPro:IPR013596), FBD-like (InterPro:IPR006566), F-box domain, Skp2-like (InterPro:IPR022364), Leucine-rich repeat 2 (InterPro:IPR013101); BEST Arabidopsis thaliana protein match is: F-box/RNI-like/FBD-like domains-containing protein (TAIR:AT1G16930.1); Has 1942 …	gi|145337807|ref|NP_178162.2|	F-box/FBD/LRR-repeat protein [Arabidopsis thaliana] &gt;gi|332198288|gb|AEE36409.1| F-box/FBD/LRR-repeat protein [Arabidopsis thaliana]
			BnaA05g21450D	16548086	16549445	AT3G18710.1	plant U-box 29 (PUB29); FUNCTIONS IN: ubiquitin-protein ligase activity; INVOLVED IN: response to chitin, protein ubiquitination; LOCATED IN: ubiquitin ligase complex; EXPRESSED IN: 22 plant structures; EXPRESSED DURING: 12 growth stages; CONTAINS InterPro DOMAIN/s: U box domain (InterPro:IPR003613), Armadillo-type fold (InterPro:IPR016024); BEST Arabidopsis thaliana protein match is: ARM repeat …	gi|297834784|ref|XP_002885274.1|	U-box domain-containing protein [Arabidopsis lyrata subsp. lyrata] &gt;gi|297331114|gb|EFH61533.1| U-box domain-containing protein [Arabidopsis lyrata subsp. lyrata]
			BnaA05g21460D	16552074	16552722	AT3G18690.1	MAP kinase substrate 1 (MKS1); CONTAINS InterPro DOMAIN/s: VQ (InterPro:IPR008889); BEST Arabidopsis thaliana protein match is: VQ motif-containing protein (TAIR:AT1G21326.1); Has 153 Blast hits to 153 proteins in 16 species: Archae - 0; Bacteria - 5; Metazoa - 0; Fungi - 1; Plants - 147; Viruses - 0; Other Eukaryotes - 0 (source: NCBI BLink).	gi|21536582|gb|AAM60914.1|	unknown [Arabidopsis thaliana]
			BnaA05g21470D	16552877	16554855	AT3G18680.1	Amino acid kinase family protein; FUNCTIONS IN: uridylate kinase activity, UMP kinase activity; INVOLVED IN: cellular amino acid biosynthetic process, pyrimidine nucleotide biosynthetic process; LOCATED IN: chloroplast; EXPRESSED IN: 23 plant structures; EXPRESSED DURING: 13 growth stages; CONTAINS InterPro DOMAIN/s: Aspartate/glutamate/uridylate kinase (InterPro:IPR001048), Uridylate kinase, bac…	gi|297830522|ref|XP_002883143.1|	aspartate/glutamate/uridylate kinase family protein [Arabidopsis lyrata subsp. lyrata] &gt;gi|297830524|ref|XP_002883144.1| aspartate/glutamate/uridylate kinase family protein [Arabidopsis lyrata subsp. lyrata] &gt;gi|297328983|gb|EFH59402.1| aspartate/glutamate/uridylate kinase family protein [Arabidopsis lyrata subsp. lyrata] &gt;gi|297328984|gb|EFH59403.1| aspartate/glutamate/uridylate kinase …
			BnaA05g21480D	16556261	16558750	AT3G18670.1	Ankyrin repeat family protein; CONTAINS InterPro DOMAIN/s: Ankyrin repeat-containing domain (InterPro:IPR020683), Ankyrin repeat (InterPro:IPR002110); BEST Arabidopsis thaliana protein match is: Ankyrin repeat family protein (TAIR:AT5G04700.1); Has 4772 Blast hits to 3121 proteins in 218 species: Archae - 7; Bacteria - 222; Metazoa - 2187; Fungi - 197; Plants - 1396; Viruses - 2; Other Eukaryotes…	gi|9293890|dbj|BAB01793.1|	unnamed protein product [Arabidopsis thaliana]
			BnaA05g21490D	16569078	16570227	-		gi|89274227|gb|ABD65631.1|	Streptomyces cyclase/dehydrase family protein [Brassica oleracea]
			BnaA05g21500D	16570360	16573960	AT3G18660.2	plant glycogenin-like starch initiation protein 1 (PGSIP1); FUNCTIONS IN: transferase activity, transferring glycosyl groups; INVOLVED IN: biosynthetic process, starch metabolic process; LOCATED IN: chloroplast; EXPRESSED IN: 19 plant structures; EXPRESSED DURING: 7 growth stages; CONTAINS InterPro DOMAIN/s: Glycosyl transferase, family 8 (InterPro:IPR002495); BEST Arabidopsis thaliana protein ma…	gi|79313285|ref|NP_001030722.1|	plant glycogenin-like starch initiation protein 1 [Arabidopsis thaliana] &gt;gi|75273936|sp|Q9LSB1.1|GUX1_ARATH RecName: Full=UDP-glucuronate:xylan alpha-glucuronosyltransferase 1; Short=UDP-GlcA:xylan glucuronyltransferase 1; AltName: Full=Glycogenin-like protein 1; AltName: Full=Plant glycogenin-like starch initiation protein 1; AltName: Full=Protein GLUCURONIC ACID SUBSTITUTION OF XYLAN 1; Sho…
			BnaA05g21510D	16574943	16576056	AT3G18650.1	AGAMOUS-like 103 (AGL103); FUNCTIONS IN: sequence-specific DNA binding transcription factor activity; INVOLVED IN: regulation of transcription, DNA-dependent; LOCATED IN: nucleus, chloroplast; EXPRESSED IN: central cell; CONTAINS InterPro DOMAIN/s: Transcription factor, MADS-box (InterPro:IPR002100); BEST Arabidopsis thaliana protein match is: AGAMOUS-like 52 (TAIR:AT4G11250.1); Has 3468 Blast hi…	gi|15230155|ref|NP_188495.1|	protein agamous-like 103 [Arabidopsis thaliana] &gt;gi|9293888|dbj|BAB01791.1| unnamed protein product [Arabidopsis thaliana] &gt;gi|119360153|gb|ABL66805.1| At3g18650 [Arabidopsis thaliana] &gt;gi|332642605|gb|AEE76126.1| protein agamous-like 103 [Arabidopsis thaliana]
			BnaA05g21520D	16577138	16578831	AT3G18630.1	uracil dna glycosylase (UNG); FUNCTIONS IN: uracil DNA N-glycosylase activity; INVOLVED IN: DNA repair, base-excision repair; LOCATED IN: mitochondrion; EXPRESSED IN: 15 plant structures; EXPRESSED DURING: 8 growth stages; CONTAINS InterPro DOMAIN/s: Uracil-DNA glycosylase (InterPro:IPR002043), Uracil-DNA glycosylase-like (InterPro:IPR005122); BEST Arabidopsis thaliana protein match is: unknown p…	gi|297834770|ref|XP_002885267.1|	uracil DNA glycosylase family protein [Arabidopsis lyrata subsp. lyrata] &gt;gi|297331107|gb|EFH61526.1| uracil DNA glycosylase family protein [Arabidopsis lyrata subsp. lyrata]
			BnaA05g21530D	16579102	16581897	AT3G18620.1	DHHC-type zinc finger family protein; FUNCTIONS IN: zinc ion binding; CONTAINS InterPro DOMAIN/s: Zinc finger, DHHC-type (InterPro:IPR001594); BEST Arabidopsis thaliana protein match is: Ankyrin repeat family protein with DHHC zinc finger domain (TAIR:AT2G14255.1); Has 4961 Blast hits to 4959 proteins in 248 species: Archae - 0; Bacteria - 0; Metazoa - 2163; Fungi - 692; Plants - 838; Viruses - 0…	gi|22331163|ref|NP_188492.2|	DHHC-type zinc finger family protein [Arabidopsis thaliana] &gt;gi|75273387|sp|Q9LIH7.1|ZDHC7_ARATH RecName: Full=Protein S-acyltransferase 11; AltName: Full=Probable palmitoyltransferase At3g18620; AltName: Full=Zinc finger DHHC domain-containing protein At3g18620 &gt;gi|9294323|dbj|BAB02220.1| unnamed protein product [Arabidopsis thaliana] &gt;gi|19424025|gb|AAL87266.1| unknown protein [Arabido…
			BnaA05g21540D	16582222	16584244	AT3G18610.1	nucleolin like 2 (NUC-L2); FUNCTIONS IN: nucleotide binding, nucleic acid binding; EXPRESSED IN: egg cell, cultured cell; CONTAINS InterPro DOMAIN/s: RNA recognition motif, RNP-1 (InterPro:IPR000504), Nucleotide-binding, alpha-beta plait (InterPro:IPR012677); BEST Arabidopsis thaliana protein match is: nucleolin like 1 (TAIR:AT1G48920.1); Has 220619 Blast hits to 110675 proteins in 3421 species: …	gi|15229678|ref|NP_188491.1|	protein NUCLEOLIN LIKE 2 [Arabidopsis thaliana] &gt;gi|122225307|sp|Q1PEP5.1|NUCL2_ARATH RecName: Full=Nucleolin 2; AltName: Full=Protein NUCLEOLIN LIKE 2; Short=AtNUC-L2; AltName: Full=Protein PARALLEL LIKE 1; Short=AtPARLL1 &gt;gi|91806437|gb|ABE65946.1| nucleolin [Arabidopsis thaliana] &gt;gi|332642601|gb|AEE76122.1| nucleolin like 2 [Arabidopsis thaliana]
			BnaA05g21550D	16594384	16598590	AT3G18610.1	nucleolin like 2 (NUC-L2); FUNCTIONS IN: nucleotide binding, nucleic acid binding; EXPRESSED IN: egg cell, cultured cell; CONTAINS InterPro DOMAIN/s: RNA recognition motif, RNP-1 (InterPro:IPR000504), Nucleotide-binding, alpha-beta plait (InterPro:IPR012677); BEST Arabidopsis thaliana protein match is: nucleolin like 1 (TAIR:AT1G48920.1); Has 220619 Blast hits to 110675 proteins in 3421 species: …	gi|15229678|ref|NP_188491.1|	protein NUCLEOLIN LIKE 2 [Arabidopsis thaliana] &gt;gi|122225307|sp|Q1PEP5.1|NUCL2_ARATH RecName: Full=Nucleolin 2; AltName: Full=Protein NUCLEOLIN LIKE 2; Short=AtNUC-L2; AltName: Full=Protein PARALLEL LIKE 1; Short=AtPARLL1 &gt;gi|91806437|gb|ABE65946.1| nucleolin [Arabidopsis thaliana] &gt;gi|332642601|gb|AEE76122.1| nucleolin like 2 [Arabidopsis thaliana]
			BnaA05g21560D	16601643	16605363	AT3G18600.1	P-loop containing nucleoside triphosphate hydrolases superfamily protein; FUNCTIONS IN: helicase activity, ATP binding, ATP-dependent helicase activity, nucleic acid binding; LOCATED IN: nucleolus; EXPRESSED IN: 21 plant structures; EXPRESSED DURING: 13 growth stages; CONTAINS InterPro DOMAIN/s: RNA helicase, DEAD-box type, Q motif (InterPro:IPR014014), DNA/RNA helicase, DEAD/DEAH box type, N-ter…	gi|15229677|ref|NP_188490.1|	DEAD-box ATP-dependent RNA helicase 51 [Arabidopsis thaliana] &gt;gi|75335038|sp|Q9LIH9.1|RH51_ARATH RecName: Full=DEAD-box ATP-dependent RNA helicase 51 &gt;gi|9294321|dbj|BAB02218.1| DEAD-box ATP-dependent RNA helicase [Arabidopsis thaliana] &gt;gi|17979083|gb|AAL49809.1| putative DEAD box helicase protein [Arabidopsis thaliana] &gt;gi|20465335|gb|AAM20071.1| putative DEAD box helicase protein …
			BnaA05g21570D	16607010	16607760	AT3G18590.1	early nodulin-like protein 5 (ENODL5); FUNCTIONS IN: electron carrier activity, copper ion binding; LOCATED IN: anchored to membrane; CONTAINS InterPro DOMAIN/s: Plastocyanin-like (InterPro:IPR003245), Cupredoxin (InterPro:IPR008972); BEST Arabidopsis thaliana protein match is: early nodulin-like protein 6 (TAIR:AT1G48940.1); Has 1372 Blast hits to 1325 proteins in 68 species: Archae - 0; Bacteri…	gi|119720752|gb|ABL97946.1|	copper ion binding/electron transporter [Brassica rapa]
			BnaA05g21580D	16608849	16609959	AT3G18580.1	Nucleic acid-binding, OB-fold-like protein; FUNCTIONS IN: single-stranded DNA binding; INVOLVED IN: biological_process unknown; CONTAINS InterPro DOMAIN/s: Nucleic acid-binding, OB-fold-like (InterPro:IPR016027), Nucleic acid-binding, OB-fold (InterPro:IPR012340), Primosome PriB/single-strand DNA-binding (InterPro:IPR000424); BEST Arabidopsis thaliana protein match is: mitochondrially targeted si…	gi|15229675|ref|NP_188488.1|	single-strand DNA-binding protein [Arabidopsis thaliana] &gt;gi|9294319|dbj|BAB02216.1| unnamed protein product [Arabidopsis thaliana] &gt;gi|332642598|gb|AEE76119.1| single-strand DNA-binding protein [Arabidopsis thaliana]
			BnaA05g21590D	16610132	16610630	AT3G18570.1	Oleosin family protein; FUNCTIONS IN: molecular_function unknown; INVOLVED IN: lipid storage; LOCATED IN: monolayer-surrounded lipid storage body, integral to membrane, membrane; EXPRESSED IN: petal, leaf whorl, male gametophyte, flower; EXPRESSED DURING: L mature pollen stage, M germinated pollen stage, 4 anthesis, petal differentiation and expansion stage; CONTAINS InterPro DOMAIN/s: Oleosin (I…	gi|15229674|ref|NP_188487.1|	Oleosin family protein [Arabidopsis thaliana] &gt;gi|9294318|dbj|BAB02215.1| unnamed protein product [Arabidopsis thaliana] &gt;gi|28393393|gb|AAO42120.1| putative oleosin [Arabidopsis thaliana] &gt;gi|28827294|gb|AAO50491.1| putative oleosin [Arabidopsis thaliana] &gt;gi|332642597|gb|AEE76118.1| Oleosin family protein [Arabidopsis thaliana]
			BnaA05g21600D	16611791	16612190	AT3G18560.1	unknown protein; BEST Arabidopsis thaliana protein match is: unknown protein (TAIR:AT1G49000.1); Has 95 Blast hits to 95 proteins in 13 species: Archae - 0; Bacteria - 0; Metazoa - 0; Fungi - 0; Plants - 95; Viruses - 0; Other Eukaryotes - 0 (source: NCBI BLink).	gi|18401929|ref|NP_566614.1|	uncharacterized protein [Arabidopsis thaliana] &gt;gi|14190489|gb|AAK55725.1|AF380644_1 AT3g18560/K24M9_5 [Arabidopsis thaliana] &gt;gi|9294317|dbj|BAB02214.1| unnamed protein product [Arabidopsis thaliana] &gt;gi|15809742|gb|AAL06799.1| AT3g18560/K24M9_5 [Arabidopsis thaliana] &gt;gi|332642596|gb|AEE76117.1| uncharacterized protein AT3G18560 [Arabidopsis thaliana]
			BnaA05g21610D	16616153	16618613	AT3G46840.1	Subtilase family protein; FUNCTIONS IN: identical protein binding, serine-type endopeptidase activity; INVOLVED IN: proteolysis, negative regulation of catalytic activity; LOCATED IN: endomembrane system; CONTAINS InterPro DOMAIN/s: Protease-associated PA (InterPro:IPR003137), Peptidase S8/S53, subtilisin/kexin/sedolisin (InterPro:IPR000209), Peptidase S8, subtilisin-related (InterPro:IPR015500),…	gi|297793423|ref|XP_002864596.1|	predicted protein [Arabidopsis lyrata subsp. lyrata] &gt;gi|297310431|gb|EFH40855.1| predicted protein [Arabidopsis lyrata subsp. lyrata]
			BnaA05g21620D	16631948	16633637	AT3G46860.1	Serine protease inhibitor, potato inhibitor I-type family protein; FUNCTIONS IN: serine-type endopeptidase inhibitor activity; INVOLVED IN: response to wounding, defense response; LOCATED IN: cellular_component unknown; CONTAINS InterPro DOMAIN/s: Proteinase inhibitor I13, potato inhibitor I (InterPro:IPR000864); BEST Arabidopsis thaliana protein match is: Serine protease inhibitor, potato inhibi…	gi|116831272|gb|ABK28590.1|	unknown [Arabidopsis thaliana]		-48519			-17913
			BnaA05g21630D	16635992	16637835	AT1G80960.1	F-box and Leucine Rich Repeat domains containing protein; CONTAINS InterPro DOMAIN/s: F-box domain, cyclin-like (InterPro:IPR001810), F-box domain, Skp2-like (InterPro:IPR022364); BEST Arabidopsis thaliana protein match is: F-box family protein (TAIR:AT1G67390.1); Has 1565 Blast hits to 1552 proteins in 25 species: Archae - 0; Bacteria - 0; Metazoa - 0; Fungi - 2; Plants - 1563; Viruses - 0; Othe…	gi|6503308|gb|AAF14684.1|AC011713_32	Contains PF|00646 F-box domain. ESTs gb|AA586135, gb|Z26675, gb|AI993239 and gb|AA585907 come from this gene [Arabidopsis thaliana]
			BnaA05g21640D	16641560	16645665	AT3G18520.1	histone deacetylase 15 (HDA15); FUNCTIONS IN: histone deacetylase activity; INVOLVED IN: DNA mediated transformation, histone deacetylation; LOCATED IN: intracellular; EXPRESSED IN: 25 plant structures; EXPRESSED DURING: 15 growth stages; CONTAINS InterPro DOMAIN/s: Zinc finger, RanBP2-type (InterPro:IPR001876), Histone deacetylase superfamily (InterPro:IPR000286); BEST Arabidopsis thaliana prote…	gi|18401915|ref|NP_566612.1|	histone deacetylase 15 [Arabidopsis thaliana] &gt;gi|357528804|sp|Q8GXJ1.2|HDA15_ARATH RecName: Full=Histone deacetylase 15 &gt;gi|332642589|gb|AEE76110.1| histone deacetylase 15 [Arabidopsis thaliana]
			BnaA05g21650D	16656874	16657518	AT3G18510.1	unknown protein; Has 15 Blast hits to 15 proteins in 9 species: Archae - 0; Bacteria - 0; Metazoa - 0; Fungi - 0; Plants - 15; Viruses - 0; Other Eukaryotes - 0 (source: NCBI BLink).	gi|15229658|ref|NP_188480.1|	uncharacterized protein [Arabidopsis thaliana] &gt;gi|26450999|dbj|BAC42606.1| unknown protein [Arabidopsis thaliana] &gt;gi|28416737|gb|AAO42899.1| At3g18510 [Arabidopsis thaliana] &gt;gi|332642587|gb|AEE76108.1| uncharacterized protein AT3G18510 [Arabidopsis thaliana]
			BnaA05g21660D	16657738	16660765	AT3G18500.3	DNAse I-like superfamily protein; FUNCTIONS IN: molecular_function unknown; INVOLVED IN: biological_process unknown; EXPRESSED IN: 24 plant structures; EXPRESSED DURING: 14 growth stages; CONTAINS InterPro DOMAIN/s: Endonuclease/exonuclease/phosphatase (InterPro:IPR005135); BEST Arabidopsis thaliana protein match is: DNAse I-like superfamily protein (TAIR:AT1G73875.1).	gi|334185440|ref|NP_001189925.1|	DNAse I-like superfamily protein [Arabidopsis thaliana] &gt;gi|332642586|gb|AEE76107.1| DNAse I-like superfamily protein [Arabidopsis thaliana]
			BnaA05g21670D	16665265	16666991	AT3G18490.1	Eukaryotic aspartyl protease family protein; FUNCTIONS IN: aspartic-type endopeptidase activity; INVOLVED IN: proteolysis; EXPRESSED IN: 22 plant structures; EXPRESSED DURING: 14 growth stages; CONTAINS InterPro DOMAIN/s: Peptidase aspartic (InterPro:IPR021109), Peptidase aspartic, catalytic (InterPro:IPR009007), Peptidase A1 (InterPro:IPR001461), Peptidase aspartic, active site (InterPro:IPR0019…	gi|297834758|ref|XP_002885261.1|	aspartyl protease family protein [Arabidopsis lyrata subsp. lyrata] &gt;gi|297331101|gb|EFH61520.1| aspartyl protease family protein [Arabidopsis lyrata subsp. lyrata]
			BnaA05g21680D	16681926	16686492	AT3G18480.1	CCAAT-displacement protein alternatively spliced product (CASP); INVOLVED IN: intra-Golgi vesicle-mediated transport; LOCATED IN: integral to membrane, Golgi apparatus; EXPRESSED IN: 24 plant structures; EXPRESSED DURING: 13 growth stages; CONTAINS InterPro DOMAIN/s: CASP, C-terminal (InterPro:IPR012955); Has 108439 Blast hits to 62245 proteins in 2877 species: Archae - 1242; Bacteria - 16953; Me…	gi|18401903|ref|NP_566611.1|	protein CASP [Arabidopsis thaliana] &gt;gi|85540967|sp|Q9LS42.2|CASP_ARATH RecName: Full=Protein CASP &gt;gi|15810373|gb|AAL07074.1| unknown protein [Arabidopsis thaliana] &gt;gi|23296990|gb|AAN13218.1| unknown protein [Arabidopsis thaliana] &gt;gi|332642581|gb|AEE76102.1| protein CASP [Arabidopsis thaliana]
			BnaA05g21690D	16687533	16688579	AT3G18470.1	PLAC8 family protein; CONTAINS InterPro DOMAIN/s: Protein of unknown function Cys-rich (InterPro:IPR006461); BEST Arabidopsis thaliana protein match is: PLAC8 family protein (TAIR:AT1G49030.1); Has 854 Blast hits to 853 proteins in 105 species: Archae - 0; Bacteria - 0; Metazoa - 132; Fungi - 122; Plants - 567; Viruses - 0; Other Eukaryotes - 33 (source: NCBI BLink).	gi|15229654|ref|NP_188476.1|	PLAC8 family protein [Arabidopsis thaliana] &gt;gi|75273885|sp|Q9LS43.1|PCR7_ARATH RecName: Full=Protein PLANT CADMIUM RESISTANCE 7; Short=AtPCR7 &gt;gi|11994110|dbj|BAB01113.1| unnamed protein product [Arabidopsis thaliana] &gt;gi|17473788|gb|AAL38329.1| unknown protein [Arabidopsis thaliana] &gt;gi|20148553|gb|AAM10167.1| unknown protein [Arabidopsis thaliana] &gt;gi|332642580|gb|AEE76101.1| PL…
			BnaA05g21700D	16690580	16691521	AT3G18460.1	PLAC8 family protein; CONTAINS InterPro DOMAIN/s: Protein of unknown function Cys-rich (InterPro:IPR006461); BEST Arabidopsis thaliana protein match is: PLAC8 family protein (TAIR:AT3G18450.1); Has 685 Blast hits to 684 proteins in 81 species: Archae - 0; Bacteria - 0; Metazoa - 90; Fungi - 48; Plants - 538; Viruses - 0; Other Eukaryotes - 9 (source: NCBI BLink).	gi|15229653|ref|NP_188475.1|	PLAC8 family protein [Arabidopsis thaliana] &gt;gi|75273886|sp|Q9LS44.1|PCR4_ARATH RecName: Full=Protein PLANT CADMIUM RESISTANCE 4; Short=AtPCR4 &gt;gi|11994109|dbj|BAB01112.1| unnamed protein product [Arabidopsis thaliana] &gt;gi|332642579|gb|AEE76100.1| PLAC8 family protein [Arabidopsis thaliana]
			BnaA05g21710D	16692133	16693093	AT3G18420.1	Protein prenylyltransferase superfamily protein; FUNCTIONS IN: binding; INVOLVED IN: biological_process unknown; LOCATED IN: chloroplast, chloroplast envelope; EXPRESSED IN: 22 plant structures; EXPRESSED DURING: 13 growth stages; CONTAINS InterPro DOMAIN/s: Tetratricopeptide-like helical (InterPro:IPR011990), Tetratricopeptide repeat-containing (InterPro:IPR013026), Bacterial transcriptional act…	gi|297834748|ref|XP_002885256.1|	tetratricopeptide repeat-containing protein [Arabidopsis lyrata subsp. lyrata] &gt;gi|297331096|gb|EFH61515.1| tetratricopeptide repeat-containing protein [Arabidopsis lyrata subsp. lyrata]
			BnaA05g21720D	16695871	16697180	AT3G18410.2	Complex I subunit NDUFS6; FUNCTIONS IN: molecular_function unknown; INVOLVED IN: photorespiration; LOCATED IN: mitochondrion, mitochondrial membrane, mitochondrial respiratory chain complex I, respiratory chain complex I; CONTAINS InterPro DOMAIN/s: NADH-ubiquinone oxidoreductase, subunit 10 (InterPro:IPR019377), Complex I subunit NDUFS6 (InterPro:IPR020163); BEST Arabidopsis thaliana protein mat…	gi|18401879|ref|NP_566608.1|	NADH dehydrogenase (ubiquinone) 1 beta subcomplex 10 [Arabidopsis thaliana] &gt;gi|186510194|ref|NP_001118655.1| NADH dehydrogenase (ubiquinone) 1 beta subcomplex 10 [Arabidopsis thaliana] &gt;gi|75165175|sp|Q94C12.1|NDBAB_ARATH RecName: Full=NADH dehydrogenase [ubiquinone] 1 beta subcomplex subunit 10-B &gt;gi|14335154|gb|AAK59857.1| AT3g18410/MYF24_12 [Arabidopsis thaliana] &gt;gi|18655369|gb|A…
			BnaA05g21730D	16709574	16710480	AT2G05600.1	F-box associated ubiquitination effector family protein; CONTAINS InterPro DOMAIN/s: F-box associated domain, type 1 (InterPro:IPR006527); BEST Arabidopsis thaliana protein match is: F-box family protein (TAIR:AT2G02030.1); Has 182 Blast hits to 173 proteins in 9 species: Archae - 0; Bacteria - 0; Metazoa - 0; Fungi - 0; Plants - 180; Viruses - 0; Other Eukaryotes - 2 (source: NCBI BLink).	gi|229914872|gb|ACQ90597.1|	putative F-box protein [Eutrema halophilum]
			BnaA05g21740D	16710595	16712075	AT3G18390.1	embryo defective 1865 (EMB1865); FUNCTIONS IN: RNA binding; INVOLVED IN: embryo development ending in seed dormancy; LOCATED IN: chloroplast; EXPRESSED IN: 22 plant structures; EXPRESSED DURING: 13 growth stages; CONTAINS InterPro DOMAIN/s: RNA-binding, CRM domain (InterPro:IPR001890); BEST Arabidopsis thaliana protein match is: CRM family member 3B (TAIR:AT4G14510.1); Has 1281 Blast hits to 1142…	gi|297830494|ref|XP_002883129.1|	EMB1865 [Arabidopsis lyrata subsp. lyrata] &gt;gi|297328969|gb|EFH59388.1| EMB1865 [Arabidopsis lyrata subsp. lyrata]
			BnaA05g21750D	16712563	16714981	AT3G18380.1	sequence-specific DNA binding transcription factors;sequence-specific DNA binding; FUNCTIONS IN: sequence-specific DNA binding, sequence-specific DNA binding transcription factor activity; INVOLVED IN: regulation of transcription, DNA-dependent; EXPRESSED IN: 22 plant structures; EXPRESSED DURING: 13 growth stages; CONTAINS InterPro DOMAIN/s: Homeobox (InterPro:IPR001356); BEST Arabidopsis thalia…	gi|22331151|ref|NP_188467.2|	sequence-specific DNA binding transcription factor [Arabidopsis thaliana] &gt;gi|75330703|sp|Q8RWJ7.1|SHH2_ARATH RecName: Full=Protein SAWADEE HOMEODOMAIN HOMOLOG 2; AltName: Full=Probable DNA-binding transcription factor 2 &gt;gi|20260286|gb|AAM13041.1| unknown protein [Arabidopsis thaliana] &gt;gi|28059773|gb|AAO30091.1| unknown protein [Arabidopsis thaliana] &gt;gi|332642567|gb|AEE76088.1| seq…
			BnaA05g21760D	16721695	16726211	AT3G18370.1	ATSYTF; FUNCTIONS IN: molecular_function unknown; INVOLVED IN: biological_process unknown; EXPRESSED IN: 24 plant structures; EXPRESSED DURING: 13 growth stages; CONTAINS InterPro DOMAIN/s: C2 membrane targeting protein (InterPro:IPR018029), C2 calcium/lipid-binding domain, CaLB (InterPro:IPR008973), C2 calcium-dependent membrane targeting (InterPro:IPR000008); BEST Arabidopsis thaliana protein m…	gi|297830492|ref|XP_002883128.1|	plant synaptotagmin [Arabidopsis lyrata subsp. lyrata] &gt;gi|297328968|gb|EFH59387.1| plant synaptotagmin [Arabidopsis lyrata subsp. lyrata]
			BnaA05g21770D	16729849	16739450	AT3G18310.1	unknown protein; Has 30 Blast hits to 30 proteins in 10 species: Archae - 0; Bacteria - 0; Metazoa - 0; Fungi - 0; Plants - 30; Viruses - 0; Other Eukaryotes - 0 (source: NCBI BLink).	gi|297814446|ref|XP_002875106.1|	predicted protein [Arabidopsis lyrata subsp. lyrata] &gt;gi|297320944|gb|EFH51365.1| predicted protein [Arabidopsis lyrata subsp. lyrata]
			BnaA05g21780D	16751214	16753746	AT3G18310.1	unknown protein; Has 30 Blast hits to 30 proteins in 10 species: Archae - 0; Bacteria - 0; Metazoa - 0; Fungi - 0; Plants - 30; Viruses - 0; Other Eukaryotes - 0 (source: NCBI BLink).	gi|15229618|ref|NP_188460.1|	uncharacterized protein [Arabidopsis thaliana] &gt;gi|11994094|dbj|BAB01097.1| unnamed protein product [Arabidopsis thaliana] &gt;gi|332642560|gb|AEE76081.1| uncharacterized protein AT3G18310 [Arabidopsis thaliana]
seq-new-rs41374	7034148	chrA09	BnaA09g12920D	6922782	6924842	AT1G63100.1	GRAS family transcription factor; CONTAINS InterPro DOMAIN/s: Transcription factor GRAS (InterPro:IPR005202); BEST Arabidopsis thaliana protein match is: GRAS family transcription factor (TAIR:AT3G54220.1); Has 2506 Blast hits to 2453 proteins in 309 species: Archae - 0; Bacteria - 4; Metazoa - 16; Fungi - 0; Plants - 2441; Viruses - 0; Other Eukaryotes - 45 (source: NCBI BLink).	gi|15221688|ref|NP_176498.1|	scarecrow-like protein 28 [Arabidopsis thaliana] &gt;gi|75169917|sp|Q9CAN3.1|SCL28_ARATH RecName: Full=Scarecrow-like protein 28; Short=AtSCL28; AltName: Full=GRAS family protein 8; Short=AtGRAS-8 &gt;gi|12323248|gb|AAG51600.1|AC010795_4 transcription factor SCARECROW, putative; 52594-50618 [Arabidopsis thaliana] &gt;gi|332195932|gb|AEE34053.1| scarecrow-like protein 28 [Arabidopsis thaliana]
			BnaA09g12930D	6950952	6952355	AT1G63090.1	phloem protein 2-A11 (PP2-A11); FUNCTIONS IN: carbohydrate binding; INVOLVED IN: N-terminal protein myristoylation; LOCATED IN: cellular_component unknown; EXPRESSED IN: 24 plant structures; EXPRESSED DURING: 15 growth stages; CONTAINS InterPro DOMAIN/s: F-box domain, Skp2-like (InterPro:IPR022364); BEST Arabidopsis thaliana protein match is: phloem protein 2-A12 (TAIR:AT1G12710.1); Has 461 Blast…	gi|297837103|ref|XP_002886433.1|	phloem protein 2-A11 [Arabidopsis lyrata subsp. lyrata] &gt;gi|297332274|gb|EFH62692.1| phloem protein 2-A11 [Arabidopsis lyrata subsp. lyrata]
			BnaA09g12940D	6959861	6962111	AT1G63050.1	MBOAT (membrane bound O-acyl transferase) family protein; FUNCTIONS IN: acyltransferase activity; INVOLVED IN: biological_process unknown; LOCATED IN: endomembrane system, membrane; EXPRESSED IN: 23 plant structures; EXPRESSED DURING: 12 growth stages; CONTAINS InterPro DOMAIN/s: Membrane bound O-acyl transferase, MBOAT (InterPro:IPR004299); BEST Arabidopsis thaliana protein match is: MBOAT (memb…	gi|15221667|ref|NP_176493.1|	lysophosphatidylcholine acyltransferase [Arabidopsis thaliana] &gt;gi|75169921|sp|Q9CAN8.1|MBOA2_ARATH RecName: Full=Lysophospholipid acyltransferase 2; Short=AtLPLAT2; AltName: Full=1-acylglycerophosphocholine O-acyltransferase 2; AltName: Full=1-acylglycerophosphoethanolamine O-acyltransferase; AltName: Full=1-acylglycerophosphoserine O-acyltransferase; AltName: Full=Lysophosphatidylcholine acy…
			BnaA09g12950D	6983514	6984281	AT1G12630.1	Integrase-type DNA-binding superfamily protein; FUNCTIONS IN: DNA binding, transcription activator activity, sequence-specific DNA binding transcription factor activity; INVOLVED IN: regulation of transcription, DNA-dependent; LOCATED IN: nucleus; CONTAINS InterPro DOMAIN/s: DNA-binding, integrase-type (InterPro:IPR016177), Pathogenesis-related transcriptional factor/ERF, DNA-binding (InterPro:IP…	gi|75262285|sp|Q9CAN9.1|ERF26_ARATH	RecName: Full=Ethylene-responsive transcription factor ERF026 &gt;gi|12323257|gb|AAG51609.1|AC010795_13 transcription factor DREB1A, putative; 22554-23300 [Arabidopsis thaliana] &gt;gi|48479276|gb|AAT44909.1| putative AP2/EREBP transcription factor [Arabidopsis thaliana]
			BnaA09g12960D	6990272	6994272	AT1G63010.4	Major Facilitator Superfamily with SPX (SYG1/Pho81/XPR1) domain-containing protein; INVOLVED IN: transmembrane transport; LOCATED IN: vacuolar membrane; EXPRESSED IN: 24 plant structures; EXPRESSED DURING: 13 growth stages; CONTAINS InterPro DOMAIN/s: SPX, N-terminal (InterPro:IPR004331), Major facilitator superfamily MFS-1 (InterPro:IPR011701), Major facilitator superfamily, general substrate tr…	gi|30696790|ref|NP_564807.2|	Major Facilitator Superfamily with SPX domain-containing protein [Arabidopsis thaliana] &gt;gi|145326106|ref|NP_001077762.1| Major Facilitator Superfamily with SPX domain-containing protein [Arabidopsis thaliana] &gt;gi|145326108|ref|NP_001077763.1| Major Facilitator Superfamily with SPX domain-containing protein [Arabidopsis thaliana] &gt;gi|8493591|gb|AAF75814.1|AC011000_17 Contains similarity …
			BnaA09g12970D	7011961	7013633	AT1G63000.1	nucleotide-rhamnose synthase/epimerase-reductase (NRS/ER); FUNCTIONS IN: UDP-4-keto-rhamnose-4-keto-reductase activity, dTDP-4-dehydrorhamnose reductase activity, UDP-4-keto-6-deoxy-glucose-3,5-epimerase activity, dTDP-4-dehydrorhamnose 3,5-epimerase activity; INVOLVED IN: dTDP-rhamnose biosynthetic process, UDP-rhamnose biosynthetic process; LOCATED IN: soluble fraction, plasma membrane; EXPRESS…	gi|21593701|gb|AAM65668.1|	unknown [Arabidopsis thaliana]
			BnaA09g12980D	7016926	7021165	AT1G62990.1	KNOTTED-like homeobox of Arabidopsis thaliana 7 (KNAT7); CONTAINS InterPro DOMAIN/s: ELK (InterPro:IPR005539), KNOX1 (InterPro:IPR005540), Homeobox (InterPro:IPR001356), Homeodomain-like (InterPro:IPR009057), KNOX2 (InterPro:IPR005541), Homeodomain-related (InterPro:IPR012287); BEST Arabidopsis thaliana protein match is: KNOTTED1-like homeobox gene 3 (TAIR:AT5G25220.1); Has 5187 Blast hits to 518…	gi|18407708|ref|NP_564805.1|	homeobox protein knotted-1-like 7 [Arabidopsis thaliana] &gt;gi|75309277|sp|Q9FPQ8.1|KNAT7_ARATH RecName: Full=Homeobox protein knotted-1-like 7; AltName: Full=Protein IRREGULAR XYLEM 11; AltName: Full=Protein KNAT7 &gt;gi|11878230|gb|AAG40858.1|AF308451_1 homeodomain transcription factor KNAT7 [Arabidopsis thaliana] &gt;gi|109946473|gb|ABG48415.1| At1g62990 [Arabidopsis thaliana] &gt;gi|33219591…
			BnaA09g12990D	7051300	7055138	AT5G08139.1	RING/U-box superfamily protein; FUNCTIONS IN: zinc ion binding; INVOLVED IN: biological_process unknown; LOCATED IN: cellular_component unknown; EXPRESSED IN: 23 plant structures; EXPRESSED DURING: 13 growth stages; CONTAINS InterPro DOMAIN/s: Zinc finger, RING-type (InterPro:IPR001841), Zinc finger, C3HC4 RING-type (InterPro:IPR018957); BEST Arabidopsis thaliana protein match is: RING/U-box supe…	gi|297822045|ref|XP_002878905.1|	predicted protein [Arabidopsis lyrata subsp. lyrata] &gt;gi|297324744|gb|EFH55164.1| predicted protein [Arabidopsis lyrata subsp. lyrata]
			BnaA09g13000D	7058921	7061488	AT1G62970.1	Chaperone DnaJ-domain superfamily protein; FUNCTIONS IN: heat shock protein binding; INVOLVED IN: protein folding; LOCATED IN: cellular_component unknown; EXPRESSED IN: 19 plant structures; EXPRESSED DURING: 9 growth stages; CONTAINS InterPro DOMAIN/s: Molecular chaperone, heat shock protein, Hsp40, DnaJ (InterPro:IPR015609), Heat shock protein DnaJ, N-terminal (InterPro:IPR001623); BEST Arabidop…	gi|8493585|gb|AAF75808.1|AC011000_11	Contains similarity to hsp40(dnaJ) gene from Methanosarcina thermophila gb|AJ010152 and contains a DnaJ domain PF|00226. ESTs gb|T45743, gb|AI993155 come from this gene [Arabidopsis thaliana]
			BnaA09g13010D	7069174	7071330	AT1G62960.1	ACC synthase 10 (ACS10); CONTAINS InterPro DOMAIN/s: 1-aminocyclopropane-1-carboxylate synthase (InterPro:IPR001176), Aminotransferase, class I/classII (InterPro:IPR004839), Pyridoxal phosphate-dependent transferase, major domain (InterPro:IPR015424), Pyridoxal phosphate-dependent transferase, major region, subdomain 1 (InterPro:IPR015421), Pyridoxal phosphate-dependent transferase, major region,…	gi|18407701|ref|NP_564804.1|	putative aminotransferase ACS10 [Arabidopsis thaliana] &gt;gi|50400664|sp|Q9LQ10.1|1A110_ARATH RecName: Full=Probable aminotransferase ACS10 &gt;gi|8493584|gb|AAF75807.1|AC011000_10 Strong similarity to ACS5 from Lupinus albus gb|AF119414, and contains an Aminotransferase-classI domain PF|00155 [Arabidopsis thaliana] &gt;gi|13194768|gb|AAK15546.1|AF348575_1 aminotransferase [Arabidopsis thaliana]…
			BnaA09g13020D	7077817	7079059	AT1G12390.1	Cornichon family protein; FUNCTIONS IN: molecular_function unknown; INVOLVED IN: intracellular signaling pathway; LOCATED IN: endomembrane system, membrane; CONTAINS InterPro DOMAIN/s: Cornichon (InterPro:IPR003377); BEST Arabidopsis thaliana protein match is: Cornichon family protein (TAIR:AT1G12340.1); Has 617 Blast hits to 617 proteins in 176 species: Archae - 0; Bacteria - 0; Metazoa - 324; F…	gi|297840241|ref|XP_002888002.1|	cornichon family protein [Arabidopsis lyrata subsp. lyrata] &gt;gi|297333843|gb|EFH64261.1| cornichon family protein [Arabidopsis lyrata subsp. lyrata]
			BnaA09g13030D	7091924	7093692	AT1G08080.1	alpha carbonic anhydrase 7 (ACA7); FUNCTIONS IN: carbonate dehydratase activity, zinc ion binding; INVOLVED IN: one-carbon metabolic process; LOCATED IN: endomembrane system; CONTAINS InterPro DOMAIN/s: Carbonic anhydrase, alpha-class, catalytic domain (InterPro:IPR001148), Carbonic anhydrase, CAH1-like (InterPro:IPR018340), Carbonic anhydrase, alpha-class, conserved site (InterPro:IPR018338); BE…	gi|4803960|gb|AAD29832.1|	putative carbonic anhydrase [Arabidopsis thaliana]
			BnaA09g13040D	7099947	7100930	AT3G46560.1	TIM9; CONTAINS InterPro DOMAIN/s: Mitochondrial inner membrane translocase complex, Tim8/9/10/13-zinc finger-like (InterPro:IPR004217); Has 542 Blast hits to 542 proteins in 190 species: Archae - 0; Bacteria - 0; Metazoa - 275; Fungi - 165; Plants - 60; Viruses - 0; Other Eukaryotes - 42 (source: NCBI BLink).	gi|15231455|ref|NP_190240.1|	mitochondrial import inner membrane translocase subunit Tim9 [Arabidopsis thaliana] &gt;gi|12643936|sp|Q9XGX9.2|TIM9_ARATH RecName: Full=Mitochondrial import inner membrane translocase subunit TIM9; AltName: Full=Protein EMBRYO DEFECTIVE 2474 &gt;gi|6523059|emb|CAB62326.1| small zinc finger-like protein TIM9 [Arabidopsis thaliana] &gt;gi|15028235|gb|AAK76614.1| putative small zinc finger protein …
			BnaA09g13050D	7105333	7106413	AT4G29970.1	F-box and associated interaction domains-containing protein; CONTAINS InterPro DOMAIN/s: F-box domain, cyclin-like (InterPro:IPR001810), F-box domain, Skp2-like (InterPro:IPR022364), F-box associated domain, type 3 (InterPro:IPR013187), F-box associated interaction domain (InterPro:IPR017451); BEST Arabidopsis thaliana protein match is: F-box and associated interaction domains-containing protein …	gi|297807225|ref|XP_002871496.1|	predicted protein [Arabidopsis lyrata subsp. lyrata] &gt;gi|297317333|gb|EFH47755.1| predicted protein [Arabidopsis lyrata subsp. lyrata]
			BnaA09g13060D	7119177	7120243	AT1G60770.1	Tetratricopeptide repeat (TPR)-like superfamily protein; FUNCTIONS IN: binding; INVOLVED IN: biological_process unknown; LOCATED IN: mitochondrion; EXPRESSED IN: 21 plant structures; EXPRESSED DURING: 13 growth stages; CONTAINS InterPro DOMAIN/s: Pentatricopeptide repeat (InterPro:IPR002885), Tetratricopeptide-like helical (InterPro:IPR011990); BEST Arabidopsis thaliana protein match is: Tetratri…	gi|297837423|ref|XP_002886593.1|	pentatricopeptide repeat-containing protein [Arabidopsis lyrata subsp. lyrata] &gt;gi|297332434|gb|EFH62852.1| pentatricopeptide repeat-containing protein [Arabidopsis lyrata subsp. lyrata]
			BnaA09g13070D	7120328	7121228	AT1G60770.1	Tetratricopeptide repeat (TPR)-like superfamily protein; FUNCTIONS IN: binding; INVOLVED IN: biological_process unknown; LOCATED IN: mitochondrion; EXPRESSED IN: 21 plant structures; EXPRESSED DURING: 13 growth stages; CONTAINS InterPro DOMAIN/s: Pentatricopeptide repeat (InterPro:IPR002885), Tetratricopeptide-like helical (InterPro:IPR011990); BEST Arabidopsis thaliana protein match is: Tetratri…	gi|297837423|ref|XP_002886593.1|	pentatricopeptide repeat-containing protein [Arabidopsis lyrata subsp. lyrata] &gt;gi|297332434|gb|EFH62852.1| pentatricopeptide repeat-containing protein [Arabidopsis lyrata subsp. lyrata]
			BnaA09g13080D	7121388	7121910	AT1G60760.1	Plant invertase/pectin methylesterase inhibitor superfamily protein; FUNCTIONS IN: enzyme inhibitor activity, pectinesterase inhibitor activity, pectinesterase activity; INVOLVED IN: biological_process unknown; LOCATED IN: endomembrane system; CONTAINS InterPro DOMAIN/s: Pectinesterase inhibitor (InterPro:IPR006501); BEST Arabidopsis thaliana protein match is: Plant invertase/pectin methylesteras…	gi|297840487|ref|XP_002888125.1|	invertase/pectin methylesterase inhibitor family protein [Arabidopsis lyrata subsp. lyrata] &gt;gi|297333966|gb|EFH64384.1| invertase/pectin methylesterase inhibitor family protein [Arabidopsis lyrata subsp. lyrata]
			BnaA09g13090D	7133338	7134953	AT3G26170.1	cytochrome P450, family 71, subfamily B, polypeptide 19 (CYP71B19); FUNCTIONS IN: electron carrier activity, monooxygenase activity, iron ion binding, oxygen binding, heme binding; INVOLVED IN: oxidation reduction; LOCATED IN: endomembrane system; CONTAINS InterPro DOMAIN/s: Cytochrome P450 (InterPro:IPR001128), Cytochrome P450, conserved site (InterPro:IPR017972), Cytochrome P450, E-class, group…	gi|15231520|ref|NP_189248.1|	cytochrome P450 71B19 [Arabidopsis thaliana] &gt;gi|13878387|sp|Q9LTM4.1|C71BJ_ARATH RecName: Full=Cytochrome P450 71B19 &gt;gi|11994436|dbj|BAB02438.1| cytochrome P450 [Arabidopsis thaliana] &gt;gi|26451925|dbj|BAC43055.1| putative cytochrome P450 [Arabidopsis thaliana] &gt;gi|29028894|gb|AAO64826.1| At3g26170 [Arabidopsis thaliana] &gt;gi|332643608|gb|AEE77129.1| cytochrome P450 71B19 [Arabidop…
			BnaA09g13100D	7167263	7170529	AT1G60670.2	Protein of unknown function (DUF3755); INVOLVED IN: biological_process unknown; EXPRESSED IN: 22 plant structures; EXPRESSED DURING: 13 growth stages; CONTAINS InterPro DOMAIN/s: Protein of unknown function DUF3755 (InterPro:IPR022228); BEST Arabidopsis thaliana protein match is: Protein of unknown function (DUF3755) (TAIR:AT1G10820.2); Has 165 Blast hits to 165 proteins in 24 species: Archae - 0…	gi|145326072|ref|NP_001077745.1|	uncharacterized protein [Arabidopsis thaliana] &gt;gi|15028081|gb|AAK76571.1| unknown protein [Arabidopsis thaliana] &gt;gi|20259309|gb|AAM14390.1| unknown protein [Arabidopsis thaliana] &gt;gi|332195597|gb|AEE33718.1| uncharacterized protein AT1G60670 [Arabidopsis thaliana]
seq-new-rs48456	26867775		BnaA09g37150D	26767245	26768280	-		gi|567151680|ref|XP_006416997.1|	hypothetical protein EUTSA_v10007538mg [Eutrema salsugineum] &gt;gi|312282807|dbj|BAJ34269.1| unnamed protein product [Thellungiella halophila] &gt;gi|557094768|gb|ESQ35350.1| hypothetical protein EUTSA_v10007538mg [Eutrema salsugineum]
			BnaA09g37160D	26769342	26775529	AT3G57940.1	CONTAINS InterPro DOMAIN/s: Domain of unknown function DUF1726 (InterPro:IPR013562), Domain of unknown function DUF699, exodeoxyribonuclease V alpha chain (InterPro:IPR007807); BEST Arabidopsis thaliana protein match is: Domain of unknown function (DUF1726) ;Putative ATPase (DUF699) (TAIR:AT1G10490.1); Has 1409 Blast hits to 1357 proteins in 630 species: Archae - 151; Bacteria - 717; Metazoa - 17…	gi|334186072|ref|NP_001190121.1|	uncharacterized protein [Arabidopsis thaliana] &gt;gi|332646200|gb|AEE79721.1| uncharacterized protein AT3G57940 [Arabidopsis thaliana]
			BnaA09g37170D	26778815	26779349	AT3G57950.1	unknown protein; FUNCTIONS IN: molecular_function unknown; INVOLVED IN: biological_process unknown; LOCATED IN: chloroplast; EXPRESSED IN: 9 plant structures; EXPRESSED DURING: 4 anthesis, C globular stage, petal differentiation and expansion stage; BEST Arabidopsis thaliana protein match is: unknown protein (TAIR:AT2G42180.1); Has 81 Blast hits to 81 proteins in 11 species: Archae - 0; Bacteria …	gi|15230907|ref|NP_191354.1|	uncharacterized protein [Arabidopsis thaliana] &gt;gi|6729538|emb|CAB67623.1| putative protein [Arabidopsis thaliana] &gt;gi|93007372|gb|ABE97189.1| unknown [Arabidopsis thaliana] &gt;gi|149944317|gb|ABR46201.1| At3g57950 [Arabidopsis thaliana] &gt;gi|332646201|gb|AEE79722.1| uncharacterized protein AT3G57950 [Arabidopsis thaliana]
			BnaA09g37180D	26782317	26783904	AT3G57970.1	Emsy N Terminus (ENT)/ plant Tudor-like domains-containing protein; CONTAINS InterPro DOMAIN/s: ENT (InterPro:IPR005491), Tudor-like, plant (InterPro:IPR014002); BEST Arabidopsis thaliana protein match is: Emsy N Terminus (ENT) domain-containing protein (TAIR:AT3G57960.1); Has 108 Blast hits to 108 proteins in 13 species: Archae - 0; Bacteria - 0; Metazoa - 0; Fungi - 0; Plants - 108; Viruses - 0…	gi|297817130|ref|XP_002876448.1|	predicted protein [Arabidopsis lyrata subsp. lyrata] &gt;gi|297322286|gb|EFH52707.1| predicted protein [Arabidopsis lyrata subsp. lyrata]
			BnaA09g37190D	26784070	26786580	AT3G57980.1	DNA-binding bromodomain-containing protein; FUNCTIONS IN: DNA binding; EXPRESSED IN: 13 plant structures; EXPRESSED DURING: 8 growth stages; CONTAINS InterPro DOMAIN/s: SANT, DNA-binding (InterPro:IPR001005), Myb, DNA-binding (InterPro:IPR014778), Bromodomain (InterPro:IPR001487), HTH transcriptional regulator, Myb-type, DNA-binding (InterPro:IPR017930); BEST Arabidopsis thaliana protein match is…	gi|15230910|ref|NP_191357.1|	DNA-binding bromodomain-containing protein [Arabidopsis thaliana] &gt;gi|6729541|emb|CAB67626.1| putative protein [Arabidopsis thaliana] &gt;gi|332646205|gb|AEE79726.1| DNA-binding bromodomain-containing protein [Arabidopsis thaliana]
			BnaA09g37200D	26787763	26789094	AT3G57990.1	unknown protein; Has 1497 Blast hits to 1323 proteins in 52 species: Archae - 0; Bacteria - 4; Metazoa - 23; Fungi - 34; Plants - 61; Viruses - 0; Other Eukaryotes - 1375 (source: NCBI BLink).	gi|15230911|ref|NP_191358.1|	uncharacterized protein [Arabidopsis thaliana] &gt;gi|6729542|emb|CAB67627.1| putative protein [Arabidopsis thaliana] &gt;gi|20259405|gb|AAM14023.1| unknown protein [Arabidopsis thaliana] &gt;gi|21689689|gb|AAM67466.1| unknown protein [Arabidopsis thaliana] &gt;gi|332646206|gb|AEE79727.1| uncharacterized protein AT3G57990 [Arabidopsis thaliana]
			BnaA09g37210D	26804687	26805233	AT3G58000.1	VQ motif-containing protein; CONTAINS InterPro DOMAIN/s: VQ (InterPro:IPR008889); BEST Arabidopsis thaliana protein match is: VQ motif-containing protein (TAIR:AT2G42140.1); Has 79 Blast hits to 79 proteins in 12 species: Archae - 0; Bacteria - 0; Metazoa - 0; Fungi - 0; Plants - 79; Viruses - 0; Other Eukaryotes - 0 (source: NCBI BLink).	gi|297817132|ref|XP_002876449.1|	VQ motif-containing protein [Arabidopsis lyrata subsp. lyrata] &gt;gi|297322287|gb|EFH52708.1| VQ motif-containing protein [Arabidopsis lyrata subsp. lyrata]
			BnaA09g37220D	26807316	26808607	AT3G58020.1	Chaperone DnaJ-domain superfamily protein; FUNCTIONS IN: heat shock protein binding; INVOLVED IN: protein folding; LOCATED IN: nucleus; CONTAINS InterPro DOMAIN/s: Molecular chaperone, heat shock protein, Hsp40, DnaJ (InterPro:IPR015609), Heat shock protein DnaJ, N-terminal (InterPro:IPR001623); BEST Arabidopsis thaliana protein match is: Chaperone DnaJ-domain superfamily protein (TAIR:AT2G42080.…	gi|297817136|ref|XP_002876451.1|	predicted protein [Arabidopsis lyrata subsp. lyrata] &gt;gi|297322289|gb|EFH52710.1| predicted protein [Arabidopsis lyrata subsp. lyrata]
			BnaA09g37230D	26809447	26811451	AT3G58030.4	RING/U-box superfamily protein; FUNCTIONS IN: zinc ion binding; CONTAINS InterPro DOMAIN/s: Zinc finger, RING-type, conserved site (InterPro:IPR017907), Zinc finger, RING-type (InterPro:IPR001841), Zinc finger, C3HC4 RING-type (InterPro:IPR018957); BEST Arabidopsis thaliana protein match is: RING/U-box superfamily protein (TAIR:AT2G42030.1).	gi|297817140|ref|XP_002876453.1|	zinc finger family protein [Arabidopsis lyrata subsp. lyrata] &gt;gi|297322291|gb|EFH52712.1| zinc finger family protein [Arabidopsis lyrata subsp. lyrata]
			BnaA09g37240D	26814335	26817319	AT3G58040.1	seven in absentia of Arabidopsis 2 (SINAT2); FUNCTIONS IN: protein binding; INVOLVED IN: multicellular organismal development, protein ubiquitination, ubiquitin-dependent protein catabolic process; LOCATED IN: nucleus; EXPRESSED IN: 24 plant structures; EXPRESSED DURING: 15 growth stages; CONTAINS InterPro DOMAIN/s: TRAF-like (InterPro:IPR008974), Seven-in-absentia protein, TRAF-like domain (Inte…	gi|297817142|ref|XP_002876454.1|	seven in absentia family protein [Arabidopsis lyrata subsp. lyrata] &gt;gi|297322292|gb|EFH52713.1| seven in absentia family protein [Arabidopsis lyrata subsp. lyrata]
			BnaA09g37250D	26817934	26819900	AT3G58060.1	Cation efflux family protein; FUNCTIONS IN: cation transmembrane transporter activity, efflux transmembrane transporter activity; INVOLVED IN: cation transport, transmembrane transport; LOCATED IN: membrane; EXPRESSED IN: 6 plant structures; EXPRESSED DURING: 4 anthesis, petal differentiation and expansion stage; CONTAINS InterPro DOMAIN/s: Cation efflux protein (InterPro:IPR002524); BEST Arabido…	gi|297820600|ref|XP_002878183.1|	predicted protein [Arabidopsis lyrata subsp. lyrata] &gt;gi|297324021|gb|EFH54442.1| predicted protein [Arabidopsis lyrata subsp. lyrata]
			BnaA09g37260D	26827363	26828125	AT3G58070.1	GLABROUS INFLORESCENCE STEMS (GIS); FUNCTIONS IN: sequence-specific DNA binding transcription factor activity, zinc ion binding, nucleic acid binding; INVOLVED IN: trichome differentiation, trichome branching, response to gibberellin stimulus, regulation of transcription; LOCATED IN: intracellular; EXPRESSED IN: 12 plant structures; EXPRESSED DURING: 7 growth stages; CONTAINS InterPro DOMAIN/s: Z…	gi|15230939|ref|NP_191366.1|	putative transcription factor GIS [Arabidopsis thaliana] &gt;gi|75328211|sp|Q84WI0.1|GIS_ARATH RecName: Full=Zinc finger protein GIS; AltName: Full=Protein GLABROUS INFLORESCENCE STEMS &gt;gi|28058836|gb|AAO29959.1| zinc finger-like protein [Arabidopsis thaliana] &gt;gi|32362299|gb|AAP80177.1| At3g58070 [Arabidopsis thaliana] &gt;gi|332646217|gb|AEE79738.1| putative transcription factor GIS [Arab…
			BnaA09g37270D	26843500	26845936	AT3G58120.1	BZIP61; FUNCTIONS IN: DNA binding, transcription activator activity, sequence-specific DNA binding transcription factor activity; INVOLVED IN: regulation of transcription, DNA-dependent; LOCATED IN: nucleus; EXPRESSED IN: 20 plant structures; EXPRESSED DURING: 12 growth stages; CONTAINS InterPro DOMAIN/s: Basic-leucine zipper (bZIP) transcription factor (InterPro:IPR004827), Basic leucine zipper …	gi|15230964|ref|NP_191371.1|	transcription factor BZIP61 [Arabidopsis thaliana] &gt;gi|15100055|gb|AAK84223.1|AF401300_1 transcription factor bZIP61 [Arabidopsis thaliana] &gt;gi|6735324|emb|CAB68150.1| putative protein [Arabidopsis thaliana] &gt;gi|20260308|gb|AAM13052.1| pelota-like protein [Arabidopsis thaliana] &gt;gi|21592956|gb|AAM64906.1| unknown [Arabidopsis thaliana] &gt;gi|30984556|gb|AAP42741.1| At3g58120 [Arabido…
			BnaA09g37280D	26855360	26856887	AT3G58130.2	N-acetylglucosaminylphosphatidylinositol de-N-acetylase family protein; FUNCTIONS IN: molecular_function unknown; INVOLVED IN: biological_process unknown; LOCATED IN: endomembrane system; CONTAINS InterPro DOMAIN/s: N-acetylglucosaminyl phosphatidylinositol deacetylase (InterPro:IPR003737); BEST Arabidopsis thaliana protein match is: N-acetylglucosaminylphosphatidylinositol de-N-acetylase family …	gi|42566026|ref|NP_191372.2|	N-acetylglucosaminylphosphatidylinositol de-N-acetylase family protein [Arabidopsis thaliana] &gt;gi|79315492|ref|NP_001030882.1| N-acetylglucosaminylphosphatidylinositol de-N-acetylase family protein [Arabidopsis thaliana] &gt;gi|50198821|gb|AAT70443.1| At3g58130 [Arabidopsis thaliana] &gt;gi|51972138|gb|AAU15173.1| At3g58130 [Arabidopsis thaliana] &gt;gi|332646224|gb|AEE79745.1| N-acetylglucosa…
			BnaA09g37290D	26856950	26859483	AT3G58140.1	phenylalanyl-tRNA synthetase class IIc family protein; FUNCTIONS IN: in 6 functions; INVOLVED IN: tRNA processing, phenylalanyl-tRNA aminoacylation, translation, tRNA aminoacylation, tRNA aminoacylation for protein translation; LOCATED IN: mitochondrion, chloroplast, membrane; EXPRESSED IN: 23 plant structures; EXPRESSED DURING: 13 growth stages; CONTAINS InterPro DOMAIN/s: Phenylalanyl-tRNA synt…	gi|18410886|ref|NP_567061.1|	phenylalanyl-tRNA synthetase [Arabidopsis thaliana] &gt;gi|75306632|sp|Q94K73.1|SYFM_ARATH RecName: Full=Phenylalanine--tRNA ligase, chloroplastic/mitochondrial; AltName: Full=Phenylalanyl-tRNA synthetase; Short=PheRS; Flags: Precursor &gt;gi|13877969|gb|AAK44062.1|AF370247_1 putative phenylalanine-tRNA synthetase [Arabidopsis thaliana] &gt;gi|17104697|gb|AAL34237.1| putative phenylalanine-tRNA s…
			BnaA09g37300D	26859898	26861551	AT3G58170.1	BET1P/SFT1P-like protein 14A (BS14A); FUNCTIONS IN: protein transporter activity, SNAP receptor activity; INVOLVED IN: ER to Golgi vesicle-mediated transport; LOCATED IN: nucleus, plasma membrane; EXPRESSED IN: 25 plant structures; EXPRESSED DURING: 15 growth stages; CONTAINS InterPro DOMAIN/s: Target SNARE coiled-coil domain (InterPro:IPR000727); BEST Arabidopsis thaliana protein match is: Targe…	gi|15230969|ref|NP_191376.1|	BET1P/SFT1P-like protein 14A [Arabidopsis thaliana] &gt;gi|27805428|sp|Q9M2J9.1|BET11_ARATH RecName: Full=Bet1-like SNARE 1-1; Short=AtBET11; AltName: Full=Bet1/Sft1-like SNARE 14a; Short=AtBS14a &gt;gi|14030603|gb|AAK52976.1|AF368175_1 Bet1/Sft1-like SNARE AtBS14a [Arabidopsis thaliana] &gt;gi|6735329|emb|CAB68155.1| putative protein [Arabidopsis thaliana] &gt;gi|26449796|dbj|BAC42021.1| unknown…
			BnaA09g37310D	26862596	26864551	AT3G58180.1	ARM repeat superfamily protein; FUNCTIONS IN: lyase activity, binding; INVOLVED IN: biological_process unknown; LOCATED IN: phycobilisome; EXPRESSED IN: 22 plant structures; EXPRESSED DURING: 13 growth stages; CONTAINS InterPro DOMAIN/s: Armadillo-like helical (InterPro:IPR011989), Armadillo-type fold (InterPro:IPR016024), PBS lyase HEAT-like repeat (InterPro:IPR004155); BEST Arabidopsis thaliana…	gi|18410896|ref|NP_567062.1|	ARM repeat superfamily protein [Arabidopsis thaliana] &gt;gi|75250258|sp|Q94JW0.1|DOHH_ARATH RecName: Full=Deoxyhypusine hydroxylase; Short=DOHH; AltName: Full=Deoxyhypusine dioxygenase; AltName: Full=Deoxyhypusine monooxygenase &gt;gi|13926240|gb|AAK49594.1|AF372878_1 AT3g58180/F9D24_90 [Arabidopsis thaliana] &gt;gi|22655416|gb|AAM98300.1| At3g58180/F9D24_90 [Arabidopsis thaliana] &gt;gi|2224239…
			BnaA09g37320D	26868740	26869540	AT3G58190.1	lateral organ boundaries-domain 29 (LBD29); CONTAINS InterPro DOMAIN/s: Lateral organ boundaries, LOB (InterPro:IPR004883); BEST Arabidopsis thaliana protein match is: Lateral organ boundaries (LOB) domain family protein (TAIR:AT2G42440.1); Has 858 Blast hits to 853 proteins in 21 species: Archae - 0; Bacteria - 0; Metazoa - 0; Fungi - 0; Plants - 858; Viruses - 0; Other Eukaryotes - 0 (source: N…	gi|15230971|ref|NP_191378.1|	protein ASYMMETRIC LEAVES 2-LIKE 16 [Arabidopsis thaliana] &gt;gi|29428017|sp|Q9M2J7.1|LBD29_ARATH RecName: Full=LOB domain-containing protein 29; AltName: Full=ASYMMETRIC LEAVES 2-like protein 16; Short=AS2-like protein 16 &gt;gi|17227168|gb|AAL38038.1|AF447893_1 LOB DOMAIN 29 [Arabidopsis thaliana] &gt;gi|6735331|emb|CAB68157.1| putative protein [Arabidopsis thaliana] &gt;gi|94442495|gb|ABF1903…
			BnaA09g37330D	26883259	26884625	AT3G58210.1	TRAF-like family protein; CONTAINS InterPro DOMAIN/s: TRAF-like (InterPro:IPR008974), MATH (InterPro:IPR002083); BEST Arabidopsis thaliana protein match is: Arabidopsis phospholipase-like protein (PEARLI 4) with TRAF-like domain (TAIR:AT3G58270.2); Has 1155 Blast hits to 996 proteins in 134 species: Archae - 2; Bacteria - 3; Metazoa - 121; Fungi - 102; Plants - 866; Viruses - 0; Other Eukaryotes …	gi|15230998|ref|NP_191386.1|	phospholipase-like protein (PEARLI 4) with TRAF-like domain [Arabidopsis thaliana] &gt;gi|79315506|ref|NP_001030883.1| phospholipase-like protein (PEARLI 4) with TRAF-like domain [Arabidopsis thaliana] &gt;gi|6735339|emb|CAB68165.1| putative protein [Arabidopsis thaliana] &gt;gi|63003780|gb|AAY25419.1| At3g58270 [Arabidopsis thaliana] &gt;gi|332646240|gb|AEE79761.1| phospholipase-like protein (PE…
			BnaA09g37340D	26890735	26893954	AT3G58340.1	TRAF-like family protein; CONTAINS InterPro DOMAIN/s: TRAF-like (InterPro:IPR008974), MATH (InterPro:IPR002083); BEST Arabidopsis thaliana protein match is: TRAF-like family protein (TAIR:AT3G58410.1); Has 913 Blast hits to 784 proteins in 111 species: Archae - 6; Bacteria - 21; Metazoa - 10; Fungi - 84; Plants - 737; Viruses - 0; Other Eukaryotes - 55 (source: NCBI BLink).	gi|6692126|gb|AAF24591.1|AC007654_7	T19E23.18 [Arabidopsis thaliana]			-43113
			BnaA09g37350D	26895125	26896313	AT3G58210.1	TRAF-like family protein; CONTAINS InterPro DOMAIN/s: TRAF-like (InterPro:IPR008974), MATH (InterPro:IPR002083); BEST Arabidopsis thaliana protein match is: Arabidopsis phospholipase-like protein (PEARLI 4) with TRAF-like domain (TAIR:AT3G58270.2); Has 1155 Blast hits to 996 proteins in 134 species: Archae - 2; Bacteria - 3; Metazoa - 121; Fungi - 102; Plants - 866; Viruses - 0; Other Eukaryotes …	gi|15230998|ref|NP_191386.1|	phospholipase-like protein (PEARLI 4) with TRAF-like domain [Arabidopsis thaliana] &gt;gi|79315506|ref|NP_001030883.1| phospholipase-like protein (PEARLI 4) with TRAF-like domain [Arabidopsis thaliana] &gt;gi|6735339|emb|CAB68165.1| putative protein [Arabidopsis thaliana] &gt;gi|63003780|gb|AAY25419.1| At3g58270 [Arabidopsis thaliana] &gt;gi|332646240|gb|AEE79761.1| phospholipase-like protein (PE…
			BnaA09g37360D	26896554	26897827	AT3G58340.1	TRAF-like family protein; CONTAINS InterPro DOMAIN/s: TRAF-like (InterPro:IPR008974), MATH (InterPro:IPR002083); BEST Arabidopsis thaliana protein match is: TRAF-like family protein (TAIR:AT3G58410.1); Has 913 Blast hits to 784 proteins in 111 species: Archae - 6; Bacteria - 21; Metazoa - 10; Fungi - 84; Plants - 737; Viruses - 0; Other Eukaryotes - 55 (source: NCBI BLink).	gi|15231015|ref|NP_191393.1|	TRAF-like family protein [Arabidopsis thaliana] &gt;gi|6735346|emb|CAB68172.1| putative protein [Arabidopsis thaliana] &gt;gi|332646250|gb|AEE79771.1| TRAF-like family protein [Arabidopsis thaliana]
			BnaA09g37370D	26898158	26901191	AT3G58410.1	TRAF-like family protein; CONTAINS InterPro DOMAIN/s: TRAF-like (InterPro:IPR008974), MATH (InterPro:IPR002083); BEST Arabidopsis thaliana protein match is: TRAF-like family protein (TAIR:AT3G58340.1); Has 815 Blast hits to 676 proteins in 51 species: Archae - 0; Bacteria - 0; Metazoa - 12; Fungi - 31; Plants - 751; Viruses - 0; Other Eukaryotes - 21 (source: NCBI BLink).	gi|15231032|ref|NP_191400.1|	TRAF-like family protein [Arabidopsis thaliana] &gt;gi|6735353|emb|CAB68179.1| putative protein [Arabidopsis thaliana] &gt;gi|332646257|gb|AEE79778.1| TRAF-like family protein [Arabidopsis thaliana]
			BnaA09g37380D	26906797	26908190	AT3G58410.1	TRAF-like family protein; CONTAINS InterPro DOMAIN/s: TRAF-like (InterPro:IPR008974), MATH (InterPro:IPR002083); BEST Arabidopsis thaliana protein match is: TRAF-like family protein (TAIR:AT3G58340.1); Has 815 Blast hits to 676 proteins in 51 species: Archae - 0; Bacteria - 0; Metazoa - 12; Fungi - 31; Plants - 751; Viruses - 0; Other Eukaryotes - 21 (source: NCBI BLink).	gi|15231032|ref|NP_191400.1|	TRAF-like family protein [Arabidopsis thaliana] &gt;gi|6735353|emb|CAB68179.1| putative protein [Arabidopsis thaliana] &gt;gi|332646257|gb|AEE79778.1| TRAF-like family protein [Arabidopsis thaliana]
			BnaA09g37390D	26909812	26910826	AT3G58450.1	Adenine nucleotide alpha hydrolases-like superfamily protein; FUNCTIONS IN: molecular_function unknown; INVOLVED IN: response to stress; LOCATED IN: cellular_component unknown; EXPRESSED IN: carpel; EXPRESSED DURING: 4 anthesis; CONTAINS InterPro DOMAIN/s: UspA (InterPro:IPR006016), Rossmann-like alpha/beta/alpha sandwich fold (InterPro:IPR014729), Universal stress protein A (InterPro:IPR006015);…	gi|297817160|ref|XP_002876463.1|	universal stress protein family protein [Arabidopsis lyrata subsp. lyrata] &gt;gi|297322301|gb|EFH52722.1| universal stress protein family protein [Arabidopsis lyrata subsp. lyrata]
			BnaA09g37400D	26910888	26913780	AT3G58460.1	RHOMBOID-like protein 15 (RBL15); CONTAINS InterPro DOMAIN/s: Ubiquitin-associated/translation elongation factor EF1B, N-terminal (InterPro:IPR000449), Ubiquitin-associated/translation elongation factor EF1B, N-terminal, eukaryote (InterPro:IPR015940), UBA-like (InterPro:IPR009060); BEST Arabidopsis thaliana protein match is: RHOMBOID-like protein 14 (TAIR:AT3G17611.1); Has 3199 Blast hits to 319…	gi|18410961|ref|NP_567064.1|	rhomboid-like protein 15 [Arabidopsis thaliana] &gt;gi|73921121|sp|Q8LB17.2|Y3846_ARATH RecName: Full=Uncharacterized protein At3g58460 &gt;gi|22531096|gb|AAM97052.1| putative protein [Arabidopsis thaliana] &gt;gi|23197956|gb|AAN15505.1| putative protein [Arabidopsis thaliana] &gt;gi|332646263|gb|AEE79784.1| rhomboid-like protein 15 [Arabidopsis thaliana]
			BnaA09g37410D	26914376	26915404	AT3G58470.1	nucleic acid binding;methyltransferases; FUNCTIONS IN: methyltransferase activity, nucleic acid binding; INVOLVED IN: methylation; LOCATED IN: cellular_component unknown; EXPRESSED IN: 21 plant structures; EXPRESSED DURING: 13 growth stages; CONTAINS InterPro DOMAIN/s: DNA methylase, N-6 adenine-specific, eukaryotic (InterPro:IPR019369), DNA methylase, N-6 adenine-specific, conserved site (InterP…	gi|18410963|ref|NP_567065.1|	nucleic acid binding / methyltransferase [Arabidopsis thaliana] &gt;gi|16648683|gb|AAL25534.1| AT3g58470/F14P22_60 [Arabidopsis thaliana] &gt;gi|22137250|gb|AAM91470.1| AT3g58470/F14P22_60 [Arabidopsis thaliana] &gt;gi|332646265|gb|AEE79786.1| nucleic acid binding / methyltransferase [Arabidopsis thaliana]
			BnaA09g37420D	26916140	26918252	AT3G58480.1	calmodulin-binding family protein; BEST Arabidopsis thaliana protein match is: calmodulin-binding family protein (TAIR:AT3G13600.1); Has 404 Blast hits to 327 proteins in 76 species: Archae - 0; Bacteria - 22; Metazoa - 8; Fungi - 105; Plants - 225; Viruses - 0; Other Eukaryotes - 44 (source: NCBI BLink).	gi|15231045|ref|NP_191407.1|	calmodulin-binding protein-like protein [Arabidopsis thaliana] &gt;gi|6735365|emb|CAB68186.1| putative protein [Arabidopsis thaliana] &gt;gi|332646266|gb|AEE79787.1| calmodulin-binding protein-like protein [Arabidopsis thaliana]
			BnaA09g37430D	26918325	26921484	AT3G56150.2	eukaryotic translation initiation factor 3C (EIF3C); FUNCTIONS IN: translation initiation factor activity; INVOLVED IN: translational initiation; LOCATED IN: cytosol, nucleus; EXPRESSED IN: 25 plant structures; EXPRESSED DURING: 15 growth stages; CONTAINS InterPro DOMAIN/s: Winged helix-turn-helix transcription repressor DNA-binding (InterPro:IPR011991), Proteasome component (PCI) domain (InterPr…	gi|297817162|ref|XP_002876464.1|	predicted protein [Arabidopsis lyrata subsp. lyrata] &gt;gi|297322302|gb|EFH52723.1| predicted protein [Arabidopsis lyrata subsp. lyrata]
			BnaA09g37440D	26922249	26923719	AT4G26340.1	F-box/RNI-like/FBD-like domains-containing protein; CONTAINS InterPro DOMAIN/s: FBD (InterPro:IPR013596), F-box domain, cyclin-like (InterPro:IPR001810), F-box domain, Skp2-like (InterPro:IPR022364), FBD-like (InterPro:IPR006566), Leucine-rich repeat 2 (InterPro:IPR013101); BEST Arabidopsis thaliana protein match is: F-box/RNI-like/FBD-like domains-containing protein (TAIR:AT4G26350.1); Has 2167 …	gi|22328947|ref|NP_194364.2|	F-box/FBD/LRR-repeat protein [Arabidopsis thaliana] &gt;gi|75244651|sp|Q8H1R7.1|FDL27_ARATH RecName: Full=F-box/FBD/LRR-repeat protein At4g26340 &gt;gi|23296372|gb|AAN13055.1| unknown protein [Arabidopsis thaliana] &gt;gi|332659787|gb|AEE85187.1| F-box/FBD/LRR-repeat protein [Arabidopsis thaliana]
			BnaA09g37450D	26924352	26927924	AT3G58500.1	protein phosphatase 2A-4 (PP2A-4); CONTAINS InterPro DOMAIN/s: Metallophosphoesterase (InterPro:IPR004843), Serine/threonine-specific protein phosphatase/bis(5-nucleosyl)-tetraphosphatase (InterPro:IPR006186); BEST Arabidopsis thaliana protein match is: protein phosphatase 2A-3 (TAIR:AT2G42500.1); Has 6816 Blast hits to 6628 proteins in 481 species: Archae - 80; Bacteria - 203; Metazoa - 2402; Fu…	gi|590637343|ref|XP_007029090.1|	Phosphatase 2A-4 [Theobroma cacao] &gt;gi|508717695|gb|EOY09592.1| Phosphatase 2A-4 [Theobroma cacao]						-94027
			BnaA09g37460D	26928112	26931349	AT3G58510.3	DEA(D/H)-box RNA helicase family protein; FUNCTIONS IN: helicase activity, ATP binding, nucleic acid binding, ATP-dependent helicase activity; LOCATED IN: nucleolus, peroxisome, plasma membrane; EXPRESSED IN: 24 plant structures; EXPRESSED DURING: 15 growth stages; CONTAINS InterPro DOMAIN/s: RNA helicase, DEAD-box type, Q motif (InterPro:IPR014014), DNA/RNA helicase, DEAD/DEAH box type, N-termin…	gi|18410973|ref|NP_567067.1|	DEAD-box ATP-dependent RNA helicase 11 [Arabidopsis thaliana] &gt;gi|42572719|ref|NP_974455.1| DEAD-box ATP-dependent RNA helicase 11 [Arabidopsis thaliana] &gt;gi|79315530|ref|NP_001030884.1| DEAD-box ATP-dependent RNA helicase 11 [Arabidopsis thaliana] &gt;gi|75329861|sp|Q8LA13.1|RH11_ARATH RecName: Full=DEAD-box ATP-dependent RNA helicase 11 &gt;gi|21593670|gb|AAM65637.1| ATP-dependent RNA hel…
			BnaA09g37470D	26931827	26933237	AT3G58520.1	Ubiquitin carboxyl-terminal hydrolase family protein; CONTAINS InterPro DOMAIN/s: RNA recognition domain, plant (InterPro:IPR021099); BEST Arabidopsis thaliana protein match is: Ubiquitin carboxyl-terminal hydrolase family protein (TAIR:AT5G48040.1); Has 410 Blast hits to 404 proteins in 16 species: Archae - 0; Bacteria - 0; Metazoa - 0; Fungi - 0; Plants - 410; Viruses - 0; Other Eukaryotes - 0 …	gi|18410975|ref|NP_567068.1|	plant organelle RNA recognition domain-containing protein [Arabidopsis thaliana] &gt;gi|15810016|gb|AAL06935.1| AT3g58520/F14P22_110 [Arabidopsis thaliana] &gt;gi|22135767|gb|AAM91040.1| AT3g58520/F14P22_110 [Arabidopsis thaliana] &gt;gi|332646273|gb|AEE79794.1| plant organelle RNA recognition domain-containing protein [Arabidopsis thaliana]
			BnaA09g37480D	26933770	26936573	AT3G58530.1	RNI-like superfamily protein; CONTAINS InterPro DOMAIN/s: Leucine-rich repeat, cysteine-containing subtype (InterPro:IPR006553); BEST Arabidopsis thaliana protein match is: RNI-like superfamily protein (TAIR:AT5G23340.1); Has 9313 Blast hits to 3891 proteins in 246 species: Archae - 0; Bacteria - 470; Metazoa - 3686; Fungi - 1044; Plants - 3046; Viruses - 9; Other Eukaryotes - 1058 (source: NCBI …	gi|18410977|ref|NP_567069.1|	RNI-like superfamily protein [Arabidopsis thaliana] &gt;gi|75154905|sp|Q8LB33.1|FB330_ARATH RecName: Full=F-box protein At3g58530 &gt;gi|21593045|gb|AAM64994.1| unknown [Arabidopsis thaliana] &gt;gi|332646275|gb|AEE79796.1| RNI-like superfamily protein [Arabidopsis thaliana]
			BnaA09g37490D	26941310	26942708	AT5G45850.1	Protein of unknown function (DUF688); CONTAINS InterPro DOMAIN/s: Protein of unknown function DUF688 (InterPro:IPR007789); BEST Arabidopsis thaliana protein match is: Protein of unknown function (DUF688) (TAIR:AT4G18630.1); Has 103 Blast hits to 72 proteins in 14 species: Archae - 0; Bacteria - 0; Metazoa - 3; Fungi - 1; Plants - 89; Viruses - 0; Other Eukaryotes - 10 (source: NCBI BLink).	gi|145358902|ref|NP_199397.2|	uncharacterized protein [Arabidopsis thaliana] &gt;gi|332007924|gb|AED95307.1| uncharacterized protein AT5G45850 [Arabidopsis thaliana]
			BnaA09g37500D	26961802	26962348	AT4G18610.1	LIGHT SENSITIVE HYPOCOTYLS 9 (LSH9); FUNCTIONS IN: molecular_function unknown; INVOLVED IN: biological_process unknown; LOCATED IN: chloroplast; EXPRESSED IN: 6 plant structures; EXPRESSED DURING: petal differentiation and expansion stage; CONTAINS InterPro DOMAIN/s: Protein of unknown function DUF640 (InterPro:IPR006936); BEST Arabidopsis thaliana protein match is: Protein of unknown function (D…	gi|15233942|ref|NP_193596.1|	uncharacterized protein [Arabidopsis thaliana] &gt;gi|75206871|sp|Q9SN52.1|LSH9_ARATH RecName: Full=Protein LIGHT-DEPENDENT SHORT HYPOCOTYLS 9; AltName: Full=Protein ORGAN BOUNDARY 9 &gt;gi|4539380|emb|CAB37446.1| putative protein [Arabidopsis thaliana] &gt;gi|7268655|emb|CAB78863.1| putative protein [Arabidopsis thaliana] &gt;gi|38566666|gb|AAR24223.1| At4g18610 [Arabidopsis thaliana] &gt;gi|475…
			BnaA09g37510D	26976173	26977760	AT5G45880.1	Pollen Ole e 1 allergen and extensin family protein; FUNCTIONS IN: molecular_function unknown; INVOLVED IN: biological_process unknown; LOCATED IN: extracellular space, endomembrane system; EXPRESSED IN: 11 plant structures; EXPRESSED DURING: L mature pollen stage, M germinated pollen stage, 4 anthesis, C globular stage, petal differentiation and expansion stage; CONTAINS InterPro DOMAIN/s: Polle…	gi|18415132|ref|NP_567562.1|	pollen Ole e 1 allergen and extensin family protein [Arabidopsis thaliana] &gt;gi|75127058|sp|Q6NMJ2.1|OLE96_ARATH RecName: Full=Pollen-specific protein-like At4g18596; Flags: Precursor &gt;gi|44681468|gb|AAS47674.1| At4g18596 [Arabidopsis thaliana] &gt;gi|62320348|dbj|BAD94719.1| pollen-specific protein - like [Arabidopsis thaliana] &gt;gi|332658666|gb|AEE84066.1| pollen Ole e 1 allergen and ext…
Bn-scaff_15782_1-p111218	16702113	chrC03	BnaC03g28220D	16599022	16603372	AT4G08770.1	Peroxidase superfamily protein; FUNCTIONS IN: peroxidase activity, heme binding; INVOLVED IN: response to oxidative stress, oxidation reduction; LOCATED IN: vacuole; EXPRESSED IN: hypocotyl, root; CONTAINS InterPro DOMAIN/s: Haem peroxidase (InterPro:IPR010255), Plant peroxidase (InterPro:IPR000823), Peroxidases heam-ligand binding site (InterPro:IPR019793), Haem peroxidase, plant/fungal/bacteria…	gi|129809|sp|P17179.1|PER2_ARMRU	RecName: Full=Peroxidase C2; Flags: Precursor &gt;gi|217932|dbj|BAA14143.1| peroxidase isozyme [Armoracia rusticana] &gt;gi|426262455|emb|CCJ34823.1| horseradish peroxidase isoenzyme HRP_04627(C2) [Armoracia rusticana]
	16702113	chrC03	BnaC03g28230D	16633630	16635631	AT4G08810.1	SUB1; BEST Arabidopsis thaliana protein match is: unknown protein (TAIR:AT2G04280.1); Has 128 Blast hits to 128 proteins in 15 species: Archae - 0; Bacteria - 0; Metazoa - 0; Fungi - 0; Plants - 127; Viruses - 0; Other Eukaryotes - 1 (source: NCBI BLink).	gi|15236611|ref|NP_192621.1|	calcium ion binding protein SUB1 [Arabidopsis thaliana] &gt;gi|7267523|emb|CAB78006.1| putative protein [Arabidopsis thaliana] &gt;gi|7321070|emb|CAB82117.1| putative protein [Arabidopsis thaliana] &gt;gi|15912229|gb|AAL08248.1| AT4g08810/T32A17_120 [Arabidopsis thaliana] &gt;gi|27363304|gb|AAO11571.1| At4g08810/T32A17_120 [Arabidopsis thaliana] &gt;gi|332657280|gb|AEE82680.1| calcium ion binding…
	16702113	chrC03	BnaC03g28240D	16637936	16638251	-		-	-
	16702113	chrC03	BnaC03g28250D	16643791	16645328	AT5G04390.1	C2H2-type zinc finger family protein; FUNCTIONS IN: zinc ion binding, nucleic acid binding; INVOLVED IN: biological_process unknown; LOCATED IN: intracellular; EXPRESSED IN: petal, leaf whorl, male gametophyte, flower, pollen tube; EXPRESSED DURING: L mature pollen stage, M germinated pollen stage, 4 anthesis, petal differentiation and expansion stage; CONTAINS InterPro DOMAIN/s: Zinc finger, C2H…	gi|15237697|ref|NP_196059.1|	C2H2-type zinc finger protein [Arabidopsis thaliana] &gt;gi|28392998|gb|AAO41934.1| putative zinc finger transcription factor [Arabidopsis thaliana] &gt;gi|28827440|gb|AAO50564.1| putative zinc finger transcription factor [Arabidopsis thaliana] &gt;gi|332003354|gb|AED90737.1| C2H2-type zinc finger protein [Arabidopsis thaliana]
	16702113	chrC03	BnaC03g28260D	16646660	16650331	AT4G08850.1	Leucine-rich repeat receptor-like protein kinase family protein; FUNCTIONS IN: kinase activity; INVOLVED IN: protein amino acid phosphorylation; LOCATED IN: plasma membrane, membrane; EXPRESSED IN: 23 plant structures; EXPRESSED DURING: 13 growth stages; CONTAINS InterPro DOMAIN/s: Protein kinase, ATP binding site (InterPro:IPR017441), Serine/threonine-protein kinase domain (InterPro:IPR002290), …	gi|186511602|ref|NP_849538.2|	probable LRR receptor-like serine/threonine-protein kinase [Arabidopsis thaliana] &gt;gi|281185491|sp|Q8VZG8.3|Y4885_ARATH RecName: Full=Probable LRR receptor-like serine/threonine-protein kinase At4g08850; Flags: Precursor &gt;gi|18086327|gb|AAL57627.1| AT4g08850/T32A17_160 [Arabidopsis thaliana] &gt;gi|224589610|gb|ACN59338.1| leucine-rich repeat receptor-like protein kinase [Arabidopsis thalia…
	16702113	chrC03	BnaC03g28270D	16659684	16660863	AT4G22180.1	CONTAINS InterPro DOMAIN/s: F-box domain, cyclin-like (InterPro:IPR001810), F-box domain, Skp2-like (InterPro:IPR022364), Protein of unknown function DUF295 (InterPro:IPR005174); BEST Arabidopsis thaliana protein match is: F-box family protein with a domain of unknown function (DUF295) (TAIR:AT4G22165.1); Has 30201 Blast hits to 17322 proteins in 780 species: Archae - 12; Bacteria - 1396; Metazoa…	gi|18415860|ref|NP_567649.1|	putative F-box protein [Arabidopsis thaliana] &gt;gi|142989975|sp|O49624.3|FB242_ARATH RecName: Full=Putative F-box protein At4g22180 &gt;gi|332659169|gb|AEE84569.1| putative F-box protein [Arabidopsis thaliana]
	16702113	chrC03	BnaC03g28280D	16663859	16665297	AT3G48290.1	cytochrome P450, family 71, subfamily A, polypeptide 24 (CYP71A24); FUNCTIONS IN: electron carrier activity, monooxygenase activity, iron ion binding, oxygen binding, heme binding; INVOLVED IN: oxidation reduction; CONTAINS InterPro DOMAIN/s: Cytochrome P450 (InterPro:IPR001128), Cytochrome P450, E-class, group I (InterPro:IPR002401), Cytochrome P450, conserved site (InterPro:IPR017972); BEST Ara…	gi|297816020|ref|XP_002875893.1|	CYP71A22 [Arabidopsis lyrata subsp. lyrata] &gt;gi|297321731|gb|EFH52152.1| CYP71A22 [Arabidopsis lyrata subsp. lyrata]
	16702113	chrC03	BnaC03g28290D	16669903	16670233	-		-	-				-1474
	16702113	chrC03	BnaC03g28300D	16673142	16675259	AT4G08900.1	arginase; FUNCTIONS IN: arginase activity, cobalt ion binding, agmatinase activity; INVOLVED IN: defense response to bacterium, arginine catabolic process, polyamine metabolic process; LOCATED IN: chloroplast; EXPRESSED IN: 8 plant structures; CONTAINS InterPro DOMAIN/s: Ureohydrolase (InterPro:IPR006035), Ureohydrolase, manganese-binding site (InterPro:IPR020855); BEST Arabidopsis thaliana prote…	gi|297813247|ref|XP_002874507.1|	arginase [Arabidopsis lyrata subsp. lyrata] &gt;gi|297320344|gb|EFH50766.1| arginase [Arabidopsis lyrata subsp. lyrata]
	16702113	chrC03	BnaC03g28310D	16689317	16690450	AT4G08950.1	EXORDIUM (EXO); FUNCTIONS IN: molecular_function unknown; INVOLVED IN: response to brassinosteroid stimulus; LOCATED IN: cell wall, plant-type cell wall; EXPRESSED IN: 21 plant structures; EXPRESSED DURING: 13 growth stages; CONTAINS InterPro DOMAIN/s: Phosphate-induced protein 1 (InterPro:IPR006766); BEST Arabidopsis thaliana protein match is: Phosphate-responsive 1 family protein (TAIR:AT1G3514…	gi|15236667|ref|NP_192634.1|	protein EXORDIUM [Arabidopsis thaliana] &gt;gi|20271142|gb|AAM18526.1|AF496655_1 cell cycle-related protein [Arabidopsis thaliana] &gt;gi|4325369|gb|AAD17365.1| T3H13.3 gene product [Arabidopsis thaliana] &gt;gi|7267537|emb|CAB78019.1| putative phi-1-like phosphate-induced protein [Arabidopsis thaliana] &gt;gi|15450812|gb|AAK96677.1| Unknown protein [Arabidopsis thaliana] &gt;gi|20259894|gb|AAM13…
	16702113	chrC03	BnaC03g28320D	16703587	16705481	AT4G08960.1	phosphotyrosyl phosphatase activator (PTPA) family protein; FUNCTIONS IN: phosphatase activator activity; INVOLVED IN: biological_process unknown; LOCATED IN: cellular_component unknown; EXPRESSED IN: 24 plant structures; EXPRESSED DURING: 15 growth stages; CONTAINS InterPro DOMAIN/s: Phosphotyrosyl phosphatase activator, PTPA (InterPro:IPR004327); Has 30201 Blast hits to 17322 proteins in 780 sp…	gi|21593155|gb|AAM65104.1|	putative phosphotyrosyl phosphatase activator protein [Arabidopsis thaliana]
	16702113	chrC03	BnaC03g28330D	16710386	16712261	AT4G08980.5	F-BOX WITH WD-40 2 (FBW2); FUNCTIONS IN: ubiquitin-protein ligase activity; INVOLVED IN: ubiquitin-dependent protein catabolic process, posttranscriptional regulation of gene expression; LOCATED IN: cellular_component unknown; EXPRESSED IN: 22 plant structures; EXPRESSED DURING: 13 growth stages; BEST Arabidopsis thaliana protein match is: RNI-like superfamily protein (TAIR:AT4G05460.1); Has 1165…	gi|18413178|ref|NP_567343.1|	F-box with WD-40 2 [Arabidopsis thaliana] &gt;gi|30680931|ref|NP_849346.1| F-box with WD-40 2 [Arabidopsis thaliana] &gt;gi|42572853|ref|NP_974523.1| F-box with WD-40 2 [Arabidopsis thaliana] &gt;gi|145332987|ref|NP_001078359.1| F-box with WD-40 2 [Arabidopsis thaliana] &gt;gi|238480265|ref|NP_001154215.1| F-box with WD-40 2 [Arabidopsis thaliana] &gt;gi|75267749|sp|Q9ZPE4.1|FBW2_ARATH RecName: F…
	16702113	chrC03	BnaC03g28340D	16712910	16715100	AT4G09010.1	ascorbate peroxidase 4 (APX4); FUNCTIONS IN: peroxidase activity, heme binding; INVOLVED IN: oxidation reduction, response to oxidative stress; LOCATED IN: in 7 components; EXPRESSED IN: 22 plant structures; EXPRESSED DURING: 15 growth stages; CONTAINS InterPro DOMAIN/s: Haem peroxidase (InterPro:IPR010255), Plant ascorbate peroxidase (InterPro:IPR002207), Haem peroxidase, plant/fungal/bacterial …	gi|312281719|dbj|BAJ33725.1|	unnamed protein product [Thellungiella halophila]
	16702113	chrC03	BnaC03g28350D	16719596	16719815	AT4G38940.1	Galactose oxidase/kelch repeat superfamily protein; CONTAINS InterPro DOMAIN/s: F-box domain, cyclin-like (InterPro:IPR001810), Galactose oxidase/kelch, beta-propeller (InterPro:IPR011043), Kelch repeat type 1 (InterPro:IPR006652), Kelch related (InterPro:IPR013089), Kelch-type beta propeller (InterPro:IPR015915); BEST Arabidopsis thaliana protein match is: Galactose oxidase/kelch repeat superfam…	gi|297797882|ref|XP_002866825.1|	kelch repeat-containing F-box family protein [Arabidopsis lyrata subsp. lyrata] &gt;gi|297312661|gb|EFH43084.1| kelch repeat-containing F-box family protein [Arabidopsis lyrata subsp. lyrata]
	16702113	chrC03	BnaC03g28360D	16719960	16720638	AT4G38940.1	Galactose oxidase/kelch repeat superfamily protein; CONTAINS InterPro DOMAIN/s: F-box domain, cyclin-like (InterPro:IPR001810), Galactose oxidase/kelch, beta-propeller (InterPro:IPR011043), Kelch repeat type 1 (InterPro:IPR006652), Kelch related (InterPro:IPR013089), Kelch-type beta propeller (InterPro:IPR015915); BEST Arabidopsis thaliana protein match is: Galactose oxidase/kelch repeat superfam…	gi|297797882|ref|XP_002866825.1|	kelch repeat-containing F-box family protein [Arabidopsis lyrata subsp. lyrata] &gt;gi|297312661|gb|EFH43084.1| kelch repeat-containing F-box family protein [Arabidopsis lyrata subsp. lyrata]
	16702113	chrC03	BnaC03g28370D	16722008	16723289	AT4G38940.1	Galactose oxidase/kelch repeat superfamily protein; CONTAINS InterPro DOMAIN/s: F-box domain, cyclin-like (InterPro:IPR001810), Galactose oxidase/kelch, beta-propeller (InterPro:IPR011043), Kelch repeat type 1 (InterPro:IPR006652), Kelch related (InterPro:IPR013089), Kelch-type beta propeller (InterPro:IPR015915); BEST Arabidopsis thaliana protein match is: Galactose oxidase/kelch repeat superfam…	gi|567210278|ref|XP_006410042.1|	hypothetical protein EUTSA_v10017704mg [Eutrema salsugineum] &gt;gi|557111211|gb|ESQ51495.1| hypothetical protein EUTSA_v10017704mg [Eutrema salsugineum]
	16702113	chrC03	BnaC03g28380D	16724613	16726110	AT4G38940.1	Galactose oxidase/kelch repeat superfamily protein; CONTAINS InterPro DOMAIN/s: F-box domain, cyclin-like (InterPro:IPR001810), Galactose oxidase/kelch, beta-propeller (InterPro:IPR011043), Kelch repeat type 1 (InterPro:IPR006652), Kelch related (InterPro:IPR013089), Kelch-type beta propeller (InterPro:IPR015915); BEST Arabidopsis thaliana protein match is: Galactose oxidase/kelch repeat superfam…	gi|297797882|ref|XP_002866825.1|	kelch repeat-containing F-box family protein [Arabidopsis lyrata subsp. lyrata] &gt;gi|297312661|gb|EFH43084.1| kelch repeat-containing F-box family protein [Arabidopsis lyrata subsp. lyrata]
	16702113	chrC03	BnaC03g28390D	16727053	16727842	AT5G40080.1	Mitochondrial ribosomal protein L27; CONTAINS InterPro DOMAIN/s: Ribosomal protein L27/L41, mitochondrial (InterPro:IPR019189); BEST Arabidopsis thaliana protein match is: Mitochondrial ribosomal protein L27 (TAIR:AT5G39800.1); Has 192 Blast hits to 192 proteins in 82 species: Archae - 0; Bacteria - 0; Metazoa - 84; Fungi - 37; Plants - 52; Viruses - 0; Other Eukaryotes - 19 (source: NCBI BLink).	gi|297808957|ref|XP_002872362.1|	predicted protein [Arabidopsis lyrata subsp. lyrata] &gt;gi|297318199|gb|EFH48621.1| predicted protein [Arabidopsis lyrata subsp. lyrata]
	16702113	chrC03	BnaC03g28400D	16744069	16745730	AT4G09020.1	isoamylase 3 (ISA3); FUNCTIONS IN: isoamylase activity, alpha-amylase activity; INVOLVED IN: carbohydrate metabolic process, starch catabolic process; LOCATED IN: chloroplast, chloroplast stroma, chloroplast starch grain; EXPRESSED IN: 23 plant structures; EXPRESSED DURING: 13 growth stages; CONTAINS InterPro DOMAIN/s: Glycosyl hydrolase, family 13, all-beta (InterPro:IPR013780), Immunoglobulin-l…	gi|297813221|ref|XP_002874494.1|	ATISA3/ISA3 [Arabidopsis lyrata subsp. lyrata] &gt;gi|297320331|gb|EFH50753.1| ATISA3/ISA3 [Arabidopsis lyrata subsp. lyrata]
	16702113	chrC03	BnaC03g28410D	16748027	16749652	AT4G38940.1	Galactose oxidase/kelch repeat superfamily protein; CONTAINS InterPro DOMAIN/s: F-box domain, cyclin-like (InterPro:IPR001810), Galactose oxidase/kelch, beta-propeller (InterPro:IPR011043), Kelch repeat type 1 (InterPro:IPR006652), Kelch related (InterPro:IPR013089), Kelch-type beta propeller (InterPro:IPR015915); BEST Arabidopsis thaliana protein match is: Galactose oxidase/kelch repeat superfam…	gi|15234897|ref|NP_195605.1|	F-box/kelch-repeat protein [Arabidopsis thaliana] &gt;gi|75212071|sp|Q9SVJ9.1|FBK95_ARATH RecName: Full=F-box/kelch-repeat protein At4g38940 &gt;gi|4539313|emb|CAB38814.1| putative protein [Arabidopsis thaliana] &gt;gi|7270877|emb|CAB80557.1| putative protein [Arabidopsis thaliana] &gt;gi|21593554|gb|AAM65521.1| unknown [Arabidopsis thaliana] &gt;gi|51968770|dbj|BAD43077.1| unknown protein [Arabi…
	16702113	chrC03	BnaC03g28420D	16751696	16752800	AT4G38940.1	Galactose oxidase/kelch repeat superfamily protein; CONTAINS InterPro DOMAIN/s: F-box domain, cyclin-like (InterPro:IPR001810), Galactose oxidase/kelch, beta-propeller (InterPro:IPR011043), Kelch repeat type 1 (InterPro:IPR006652), Kelch related (InterPro:IPR013089), Kelch-type beta propeller (InterPro:IPR015915); BEST Arabidopsis thaliana protein match is: Galactose oxidase/kelch repeat superfam…	gi|297797882|ref|XP_002866825.1|	kelch repeat-containing F-box family protein [Arabidopsis lyrata subsp. lyrata] &gt;gi|297312661|gb|EFH43084.1| kelch repeat-containing F-box family protein [Arabidopsis lyrata subsp. lyrata]
	16702113	chrC03	BnaC03g28430D	16756736	16757135	AT4G38940.1	Galactose oxidase/kelch repeat superfamily protein; CONTAINS InterPro DOMAIN/s: F-box domain, cyclin-like (InterPro:IPR001810), Galactose oxidase/kelch, beta-propeller (InterPro:IPR011043), Kelch repeat type 1 (InterPro:IPR006652), Kelch related (InterPro:IPR013089), Kelch-type beta propeller (InterPro:IPR015915); BEST Arabidopsis thaliana protein match is: Galactose oxidase/kelch repeat superfam…	gi|297797882|ref|XP_002866825.1|	kelch repeat-containing F-box family protein [Arabidopsis lyrata subsp. lyrata] &gt;gi|297312661|gb|EFH43084.1| kelch repeat-containing F-box family protein [Arabidopsis lyrata subsp. lyrata]
	16702113	chrC03	BnaC03g28440D	16761398	16763524	AT2G26200.1	S-adenosyl-L-methionine-dependent methyltransferases superfamily protein; CONTAINS InterPro DOMAIN/s: Methyltransferase-16, putative (InterPro:IPR019410), Methyltransferase type 12 (InterPro:IPR013217); BEST Arabidopsis thaliana protein match is: Methyltransferase family protein (TAIR:AT1G54650.1); Has 35333 Blast hits to 34131 proteins in 2444 species: Archae - 798; Bacteria - 22429; Metazoa - 9…	gi|590574163|ref|XP_007012325.1|	S-adenosyl-L-methionine-dependent methyltransferases superfamily protein isoform 1 [Theobroma cacao] &gt;gi|590574166|ref|XP_007012326.1| S-adenosyl-L-methionine-dependent methyltransferases superfamily protein isoform 1 [Theobroma cacao] &gt;gi|508782688|gb|EOY29944.1| S-adenosyl-L-methionine-dependent methyltransferases superfamily protein isoform 1 [Theobroma cacao] &gt;gi|508782689|gb|EOY2994…
	16702113	chrC03	BnaC03g28450D	16774472	16776697	AT4G09060.2	unknown protein; BEST Arabidopsis thaliana protein match is: unknown protein (TAIR:AT1G14680.1).	gi|334186415|ref|NP_001190692.1|	uncharacterized protein [Arabidopsis thaliana] &gt;gi|332657318|gb|AEE82718.1| uncharacterized protein AT4G09060 [Arabidopsis thaliana]
	16702113	chrC03	BnaC03g28460D	16779550	16779913	AT5G52975.1	Protein of unknown function (DUF1278); FUNCTIONS IN: molecular_function unknown; INVOLVED IN: biological_process unknown; LOCATED IN: endomembrane system; EXPRESSED IN: 12 plant structures; EXPRESSED DURING: 6 growth stages; CONTAINS InterPro DOMAIN/s: Protein of unknown function DUF1278 (InterPro:IPR010701); BEST Arabidopsis thaliana protein match is: Protein of unknown function (DUF1278) (TAIR:…	gi|21536633|gb|AAM60965.1|	unknown [Arabidopsis thaliana]
	16702113	chrC03	BnaC03g28470D	16782575	16783565	AT4G09130.1	RING/U-box superfamily protein; FUNCTIONS IN: zinc ion binding; LOCATED IN: endomembrane system; CONTAINS InterPro DOMAIN/s: Zinc finger, RING-type (InterPro:IPR001841), Zinc finger, C3HC4 RING-type (InterPro:IPR018957); BEST Arabidopsis thaliana protein match is: RING/U-box superfamily protein (TAIR:AT4G09120.1); Has 9831 Blast hits to 9804 proteins in 292 species: Archae - 0; Bacteria - 6; Meta…	gi|297809097|ref|XP_002872432.1|	zinc finger family protein [Arabidopsis lyrata subsp. lyrata] &gt;gi|297318269|gb|EFH48691.1| zinc finger family protein [Arabidopsis lyrata subsp. lyrata]
	16702113	chrC03	BnaC03g28480D	16783753	16787405	AT4G09140.1	MUTL-homologue 1 (MLH1); FUNCTIONS IN: protein binding, bridging; INVOLVED IN: in 6 processes; LOCATED IN: nuclear chromatin; EXPRESSED IN: 14 plant structures; EXPRESSED DURING: 6 growth stages; CONTAINS InterPro DOMAIN/s: DNA mismatch repair protein Mlh1 (InterPro:IPR011186), DNA mismatch repair, conserved site (InterPro:IPR014762), ATPase-like, ATP-binding domain (InterPro:IPR003594), DNA mism…	gi|30680985|ref|NP_567345.2|	DNA mismatch repair protein MLH1 [Arabidopsis thaliana] &gt;gi|75267890|sp|Q9ZRV4.1|MLH1_ARATH RecName: Full=DNA mismatch repair protein MLH1; AltName: Full=MutL protein homolog 1; AltName: Full=Protein MUTL-HOMOLOGUE 1; Short=AtMLH1 &gt;gi|3893081|emb|CAA10163.1| MLH1 protein [Arabidopsis thaliana] &gt;gi|7267557|emb|CAB78038.1| MLH1 protein [Arabidopsis thaliana] &gt;gi|332657326|gb|AEE82726.1|…
	16702113	chrC03	BnaC03g28490D	16792572	16795177	AT4G09160.1	SEC14 cytosolic factor family protein / phosphoglyceride transfer family protein; FUNCTIONS IN: transporter activity; INVOLVED IN: transport; LOCATED IN: chloroplast; CONTAINS InterPro DOMAIN/s: Cellular retinaldehyde-binding/triple function, C-terminal (InterPro:IPR001251), Cellular retinaldehyde-binding/triple function, N-terminal (InterPro:IPR008273), GOLD (InterPro:IPR009038), Phosphatidylino…	gi|297809109|ref|XP_002872438.1|	SEC14 cytosolic factor family protein [Arabidopsis lyrata subsp. lyrata] &gt;gi|297318275|gb|EFH48697.1| SEC14 cytosolic factor family protein [Arabidopsis lyrata subsp. lyrata]
	16702113	chrC03	BnaC03g28500D	16795943	16796312	AT1G35430.1	unknown protein; FUNCTIONS IN: molecular_function unknown; INVOLVED IN: biological_process unknown; LOCATED IN: mitochondrion; EXPRESSED IN: 22 plant structures; EXPRESSED DURING: 13 growth stages; BEST Arabidopsis thaliana protein match is: unknown protein (TAIR:AT4G09170.1); Has 23 Blast hits to 23 proteins in 5 species: Archae - 0; Bacteria - 0; Metazoa - 0; Fungi - 0; Plants - 23; Viruses - 0…	gi|12324286|gb|AAG52115.1|AC023064_8	unknown protein; 37182-38139 [Arabidopsis thaliana]
	16702113	chrC03	BnaC03g28510D	16801825	16802884	AT3G57710.1	Protein kinase superfamily protein; FUNCTIONS IN: protein kinase activity, kinase activity, ATP binding; INVOLVED IN: protein amino acid phosphorylation; EXPRESSED IN: 21 plant structures; EXPRESSED DURING: 10 growth stages; CONTAINS InterPro DOMAIN/s: Protein kinase, catalytic domain (InterPro:IPR000719), Serine/threonine-protein kinase-like domain (InterPro:IPR017442), Protein kinase-like domai…	gi|297820570|ref|XP_002878168.1|	kinase family protein [Arabidopsis lyrata subsp. lyrata] &gt;gi|297324006|gb|EFH54427.1| kinase family protein [Arabidopsis lyrata subsp. lyrata]
	16702113	chrC03	BnaC03g28520D	16810194	16813521	AT1G61150.6	LisH and RanBPM domains containing protein; FUNCTIONS IN: molecular_function unknown; INVOLVED IN: biological_process unknown; LOCATED IN: cellular_component unknown; EXPRESSED IN: 23 plant structures; EXPRESSED DURING: 13 growth stages; CONTAINS InterPro DOMAIN/s: LisH dimerisation motif, subgroup (InterPro:IPR013720), Ran binding protein, CRA domain (InterPro:IPR019589), CTLH, C-terminal LisH m…	gi|30681030|ref|NP_192668.2|	LisH and RanBPM domain-containing protein [Arabidopsis thaliana] &gt;gi|26450040|dbj|BAC42140.1| unknown protein [Arabidopsis thaliana] &gt;gi|105829991|gb|ABF74710.1| At4g09300 [Arabidopsis thaliana] &gt;gi|332657340|gb|AEE82740.1| LisH and RanBPM domain-containing protein [Arabidopsis thaliana]
Bn-scaff_16888_1-p45860	44839791	chrC04	BnaC04g44910D	44735958	44738539	AT2G34880.1	maternal effect embryo arrest 27 (MEE27); FUNCTIONS IN: sequence-specific DNA binding transcription factor activity; INVOLVED IN: embryo development ending in seed dormancy, regulation of transcription, pollen development; LOCATED IN: nucleus; EXPRESSED IN: sperm cell; CONTAINS InterPro DOMAIN/s: Transcription factor jumonji/aspartyl beta-hydroxylase (InterPro:IPR003347), FY-rich, C-terminal (Int…	gi|297826959|ref|XP_002881362.1|	predicted protein [Arabidopsis lyrata subsp. lyrata] &gt;gi|297327201|gb|EFH57621.1| predicted protein [Arabidopsis lyrata subsp. lyrata]
			BnaC04g44920D	44753340	44753886	AT2G35910.1	RING/U-box superfamily protein; FUNCTIONS IN: zinc ion binding; CONTAINS InterPro DOMAIN/s: Zinc finger, RING-type (InterPro:IPR001841), Zinc finger, C3HC4 RING-type (InterPro:IPR018957); BEST Arabidopsis thaliana protein match is: RING/U-box superfamily protein (TAIR:AT5G06490.1); Has 8225 Blast hits to 8203 proteins in 288 species: Archae - 0; Bacteria - 0; Metazoa - 1997; Fungi - 507; Plants -…	gi|4510378|gb|AAD21466.1|	putative RING zinc finger protein [Arabidopsis thaliana]
			BnaC04g44930D	44755935	44756133	-		-	-
			BnaC04g44940D	44763778	44766128	AT1G56070.1	LOW EXPRESSION OF OSMOTICALLY RESPONSIVE GENES 1 (LOS1); FUNCTIONS IN: translation factor activity, nucleic acid binding, copper ion binding, translation elongation factor activity; INVOLVED IN: response to cold; LOCATED IN: cytosol, nucleolus, chloroplast, plasma membrane, membrane; EXPRESSED IN: 29 plant structures; EXPRESSED DURING: 15 growth stages; CONTAINS InterPro DOMAIN/s: Protein synthes…	gi|6056373|gb|AAF02837.1|AC009894_8	elongation factor EF-2 [Arabidopsis thaliana]
			BnaC04g44950D	44766186	44766729	AT1G56070.1	LOW EXPRESSION OF OSMOTICALLY RESPONSIVE GENES 1 (LOS1); FUNCTIONS IN: translation factor activity, nucleic acid binding, copper ion binding, translation elongation factor activity; INVOLVED IN: response to cold; LOCATED IN: cytosol, nucleolus, chloroplast, plasma membrane, membrane; EXPRESSED IN: 29 plant structures; EXPRESSED DURING: 15 growth stages; CONTAINS InterPro DOMAIN/s: Protein synthes…	gi|6056373|gb|AAF02837.1|AC009894_8	elongation factor EF-2 [Arabidopsis thaliana]
			BnaC04g44960D	44797066	44798305	AT2G35930.1	plant U-box 23 (PUB23); CONTAINS InterPro DOMAIN/s: U box domain (InterPro:IPR003613), Armadillo-like helical (InterPro:IPR011989), Armadillo-type fold (InterPro:IPR016024); BEST Arabidopsis thaliana protein match is: plant U-box 22 (TAIR:AT3G52450.1); Has 2501 Blast hits to 2466 proteins in 187 species: Archae - 0; Bacteria - 34; Metazoa - 243; Fungi - 89; Plants - 1910; Viruses - 3; Other Eukar…	gi|4510376|gb|AAD21464.1|	unknown protein [Arabidopsis thaliana]
			BnaC04g44970D	44808820	44812263	AT2G35940.3	BEL1-like homeodomain 1 (BLH1); CONTAINS InterPro DOMAIN/s: Homeobox (InterPro:IPR001356), Homeodomain-like (InterPro:IPR009057), POX (InterPro:IPR006563), Homeodomain-related (InterPro:IPR012287); BEST Arabidopsis thaliana protein match is: BEL1-like homeodomain 6 (TAIR:AT4G34610.2); Has 35333 Blast hits to 34131 proteins in 2444 species: Archae - 798; Bacteria - 22429; Metazoa - 974; Fungi - 99…	gi|15227535|ref|NP_181138.1|	BEL1-like homeodomain 1 [Arabidopsis thaliana] &gt;gi|30686614|ref|NP_850256.1| BEL1-like homeodomain 1 [Arabidopsis thaliana] &gt;gi|79324414|ref|NP_001031490.1| BEL1-like homeodomain 1 [Arabidopsis thaliana] &gt;gi|75313495|sp|Q9SJ56.1|BLH1_ARATH RecName: Full=BEL1-like homeodomain protein 1; Short=BEL1-like protein 1; AltName: Full=Protein EMBRYO SAC DEVELOPMENT ARREST 29 &gt;gi|4510375|gb|AAD…
			BnaC04g44980D	44841773	44842964	AT2G35960.1	NDR1/HIN1-like 12 (NHL12); CONTAINS InterPro DOMAIN/s: Late embryogenesis abundant protein, group 2 (InterPro:IPR004864); BEST Arabidopsis thaliana protein match is: Late embryogenesis abundant (LEA) hydroxyproline-rich glycoprotein family (TAIR:AT3G52470.1); Has 889 Blast hits to 889 proteins in 28 species: Archae - 0; Bacteria - 0; Metazoa - 0; Fungi - 0; Plants - 889; Viruses - 0; Other Eukary…	gi|78214842|gb|ABB36604.1|	hairpin-induced 1-like protein NHL18B [Brassica napus]
			BnaC04g44990D	44848244	44848583	AT2G38940.1	phosphate transporter 1;4 (PHT1;4); FUNCTIONS IN: phosphate transmembrane transporter activity, carbohydrate transmembrane transporter activity, inorganic phosphate transmembrane transporter activity, sugar:hydrogen symporter activity; INVOLVED IN: transport, phosphate transport, transmembrane transport; LOCATED IN: nucleus, plasma membrane, vacuole, membrane; EXPRESSED IN: male gametophyte, cult…	gi|110741879|dbj|BAE98881.1|	phosphate transporter [Arabidopsis thaliana]
			BnaC04g45000D	44856174	44856809	AT1G01640.2	BTB/POZ domain-containing protein; CONTAINS InterPro DOMAIN/s: BTB/POZ (InterPro:IPR013069), BTB/POZ fold (InterPro:IPR011333), Kelch related (InterPro:IPR013089), BTB/POZ-like (InterPro:IPR000210); BEST Arabidopsis thaliana protein match is: BTB/POZ domain-containing protein (TAIR:AT3G56230.1); Has 4339 Blast hits to 4265 proteins in 145 species: Archae - 0; Bacteria - 0; Metazoa - 3351; Fungi -…	gi|15223447|ref|NP_171670.1|	BTB/POZ domain-containing protein [Arabidopsis thaliana] &gt;gi|30678163|ref|NP_849574.1| BTB/POZ domain-containing protein [Arabidopsis thaliana] &gt;gi|75311457|sp|Q9LQ95.1|Y1164_ARATH RecName: Full=BTB/POZ domain-containing protein At1g01640 &gt;gi|8671833|gb|AAF78396.1|AC009273_2 Contains similarity to the speckle-type POZ protein from Homo sapiens gb|AJ000644. It contains a BTB/POZ domain PF…
			BnaC04g45010D	44857307	44857991	AT2G35980.1	YELLOW-LEAF-SPECIFIC GENE 9 (YLS9); FUNCTIONS IN: molecular_function unknown; INVOLVED IN: defense response to virus, leaf senescence, response to other organism; LOCATED IN: chloroplast; EXPRESSED IN: 7 plant structures; EXPRESSED DURING: 4 anthesis, 4 leaf senescence stage, petal differentiation and expansion stage; CONTAINS InterPro DOMAIN/s: Late embryogenesis abundant protein, group 2 (Inter…	gi|297823405|ref|XP_002879585.1|	yellow-leaf-specific gene 9 [Arabidopsis lyrata subsp. lyrata] &gt;gi|297325424|gb|EFH55844.1| yellow-leaf-specific gene 9 [Arabidopsis lyrata subsp. lyrata]
			BnaC04g45020D	44868918	44870022	-		gi|72384493|gb|AAZ67609.1|	80A08_24 [Brassica rapa subsp. pekinensis]
			BnaC04g45030D	44871270	44874124	AT2G35990.1	Putative lysine decarboxylase family protein; CONTAINS InterPro DOMAIN/s: Conserved hypothetical protein CHP00730 (InterPro:IPR005269); BEST Arabidopsis thaliana protein match is: Putative lysine decarboxylase family protein (TAIR:AT5G06300.1); Has 5018 Blast hits to 5017 proteins in 1508 species: Archae - 25; Bacteria - 3489; Metazoa - 10; Fungi - 132; Plants - 385; Viruses - 0; Other Eukaryotes…	gi|568855990|ref|XP_006481574.1|	PREDICTED: cytokinin riboside 5&apos;-monophosphate phosphoribohydrolase LOG7-like [Citrus sinensis]
			BnaC04g45040D	44875572	44877364	AT2G37310.1	Pentatricopeptide repeat (PPR) superfamily protein; CONTAINS InterPro DOMAIN/s: Pentatricopeptide repeat (InterPro:IPR002885); BEST Arabidopsis thaliana protein match is: Tetratricopeptide repeat (TPR)-like superfamily protein (TAIR:AT2G29760.1); Has 41005 Blast hits to 14175 proteins in 268 species: Archae - 2; Bacteria - 17; Metazoa - 83; Fungi - 122; Plants - 40263; Viruses - 0; Other Eukaryot…	gi|297827241|ref|XP_002881503.1|	pentatricopeptide repeat-containing protein [Arabidopsis lyrata subsp. lyrata] &gt;gi|297327342|gb|EFH57762.1| pentatricopeptide repeat-containing protein [Arabidopsis lyrata subsp. lyrata]
			BnaC04g45050D	44877414	44877670	AT2G37310.1	Pentatricopeptide repeat (PPR) superfamily protein; CONTAINS InterPro DOMAIN/s: Pentatricopeptide repeat (InterPro:IPR002885); BEST Arabidopsis thaliana protein match is: Tetratricopeptide repeat (TPR)-like superfamily protein (TAIR:AT2G29760.1); Has 41005 Blast hits to 14175 proteins in 268 species: Archae - 2; Bacteria - 17; Metazoa - 83; Fungi - 122; Plants - 40263; Viruses - 0; Other Eukaryot…	-	-
			BnaC04g45060D	44877808	44879305	AT2G37320.1	Tetratricopeptide repeat (TPR)-like superfamily protein; FUNCTIONS IN: molecular_function unknown; INVOLVED IN: biological_process unknown; LOCATED IN: mitochondrion; EXPRESSED IN: shoot apex, embryo, leaf whorl, flower, seed; EXPRESSED DURING: F mature embryo stage, petal differentiation and expansion stage, E expanded cotyledon stage, D bilateral stage; CONTAINS InterPro DOMAIN/s: Pentatricopep…	gi|297823557|ref|XP_002879661.1|	pentatricopeptide repeat-containing protein [Arabidopsis lyrata subsp. lyrata] &gt;gi|297325500|gb|EFH55920.1| pentatricopeptide repeat-containing protein [Arabidopsis lyrata subsp. lyrata]
			BnaC04g45070D	44880101	44881348	AT2G37330.1	ALUMINUM SENSITIVE 3 (ALS3); CONTAINS InterPro DOMAIN/s: Conserved hypothetical protein CHP00245 (InterPro:IPR005226); Has 1906 Blast hits to 1906 proteins in 934 species: Archae - 39; Bacteria - 1722; Metazoa - 0; Fungi - 12; Plants - 43; Viruses - 0; Other Eukaryotes - 90 (source: NCBI BLink).	gi|15228120|ref|NP_181270.1|	protein aluminum sensitive 3 [Arabidopsis thaliana] &gt;gi|75216846|sp|Q9ZUT3.1|ALS3_ARATH RecName: Full=Protein ALUMINUM SENSITIVE 3; AltName: Full=ABC transporter I family member 16; Short=ABC transporter ABCI.16; Short=AtABCI16; AltName: Full=ybbM homolog protein &gt;gi|4056487|gb|AAC98053.1| unknown protein [Arabidopsis thaliana] &gt;gi|18252849|gb|AAL62351.1| unknown protein [Arabidopsis tha…
			BnaC04g45080D	44881462	44883688	AT2G37360.1	ABC-2 type transporter family protein; FUNCTIONS IN: ATPase activity, coupled to transmembrane movement of substances; INVOLVED IN: transport; LOCATED IN: membrane; EXPRESSED IN: petal, hypocotyl, root, flower; EXPRESSED DURING: 4 anthesis, petal differentiation and expansion stage; CONTAINS InterPro DOMAIN/s: ATPase, AAA+ type, core (InterPro:IPR003593), ABC transporter-like (InterPro:IPR003439)…	gi|297827243|ref|XP_002881504.1|	abc transporter family protein [Arabidopsis lyrata subsp. lyrata] &gt;gi|297327343|gb|EFH57763.1| abc transporter family protein [Arabidopsis lyrata subsp. lyrata]
			BnaC04g45090D	44891995	44892133	-		-	-
			BnaC04g45100D	44898409	44903249	AT2G37370.1	unknown protein; BEST Arabidopsis thaliana protein match is: unknown protein (TAIR:AT5G13560.1); Has 30201 Blast hits to 17322 proteins in 780 species: Archae - 12; Bacteria - 1396; Metazoa - 17338; Fungi - 3422; Plants - 5037; Viruses - 0; Other Eukaryotes - 2996 (source: NCBI BLink).	gi|186506124|ref|NP_181273.3|	uncharacterized protein [Arabidopsis thaliana] &gt;gi|330254295|gb|AEC09389.1| uncharacterized protein AT2G37370 [Arabidopsis thaliana]
			BnaC04g45110D	44904255	44904438	-		-	-
			BnaC04g45120D	44908304	44908367	-		-	-
			BnaC04g45130D	44908667	44909840	AT2G37390.1	Chloroplast-targeted copper chaperone protein; FUNCTIONS IN: metal ion binding; INVOLVED IN: metal ion transport; LOCATED IN: cellular_component unknown; EXPRESSED IN: 12 plant structures; EXPRESSED DURING: 7 growth stages; CONTAINS InterPro DOMAIN/s: Heavy metal transport/detoxification protein (InterPro:IPR006121), Copper chaperone, chloroplast-targeted, predicted (InterPro:IPR016578); BEST Ara…	gi|334184776|ref|NP_001189699.1|	chloroplast-targeted copper chaperone protein [Arabidopsis thaliana] &gt;gi|330254298|gb|AEC09392.1| chloroplast-targeted copper chaperone protein [Arabidopsis thaliana]
			BnaC04g45140D	44910142	44911497	AT2G37400.1	Tetratricopeptide repeat (TPR)-like superfamily protein; FUNCTIONS IN: binding; INVOLVED IN: biological_process unknown; LOCATED IN: chloroplast thylakoid lumen, chloroplast envelope; EXPRESSED IN: 21 plant structures; EXPRESSED DURING: 12 growth stages; CONTAINS InterPro DOMAIN/s: Tetratricopeptide-like helical (InterPro:IPR011990), Tetratricopeptide repeat-containing (InterPro:IPR013026), Tetra…	gi|21617936|gb|AAM66986.1|	unknown [Arabidopsis thaliana]
			BnaC04g45150D	44912441	44918265	AT2G37420.1	ATP binding microtubule motor family protein; FUNCTIONS IN: microtubule motor activity, ATP binding; INVOLVED IN: microtubule-based movement; LOCATED IN: chloroplast; EXPRESSED IN: 19 plant structures; EXPRESSED DURING: 9 growth stages; CONTAINS InterPro DOMAIN/s: Kinesin, motor region, conserved site (InterPro:IPR019821), Kinesin, motor domain (InterPro:IPR001752); BEST Arabidopsis thaliana prot…	gi|30687132|ref|NP_850281.1|	ATP binding microtubule motor family protein [Arabidopsis thaliana] &gt;gi|110737312|dbj|BAF00602.1| putative kinesin heavy chain [Arabidopsis thaliana] &gt;gi|330254302|gb|AEC09396.1| ATP binding microtubule motor family protein [Arabidopsis thaliana]
			BnaC04g45160D	44926044	44926584	AT2G37430.1	C2H2 and C2HC zinc fingers superfamily protein; FUNCTIONS IN: sequence-specific DNA binding transcription factor activity, zinc ion binding, nucleic acid binding; INVOLVED IN: response to chitin, regulation of transcription; LOCATED IN: intracellular; EXPRESSED IN: cotyledon, root, petiole; CONTAINS InterPro DOMAIN/s: Zinc finger, C2H2-like (InterPro:IPR015880), Zinc finger, C2H2-type (InterPro:I…	gi|297823575|ref|XP_002879670.1|	zinc finger family protein [Arabidopsis lyrata subsp. lyrata] &gt;gi|297325509|gb|EFH55929.1| zinc finger family protein [Arabidopsis lyrata subsp. lyrata]
			BnaC04g45170D	44953588	44956912	AT2G37440.1	DNAse I-like superfamily protein; FUNCTIONS IN: hydrolase activity, inositol or phosphatidylinositol phosphatase activity; INVOLVED IN: biological_process unknown; EXPRESSED IN: sperm cell, root; CONTAINS InterPro DOMAIN/s: Inositol polyphosphate related phosphatase (InterPro:IPR000300), Endonuclease/exonuclease/phosphatase (InterPro:IPR005135); BEST Arabidopsis thaliana protein match is: DNAse I…	gi|297823583|ref|XP_002879674.1|	endonuclease/exonuclease/phosphatase family protein [Arabidopsis lyrata subsp. lyrata] &gt;gi|297325513|gb|EFH55933.1| endonuclease/exonuclease/phosphatase family protein [Arabidopsis lyrata subsp. lyrata]
Bn-scaff_20270_1-p620404	46737401		BnaC04g47660D	46635570	46637090	-		-	-
			BnaC04g47670D	46645405	46646474	-		gi|21618167|gb|AAM67217.1|	adhesive/proline-rich protein homolog [Arabidopsis thaliana]
			BnaC04g47680D	46649892	46651343	AT2G41430.5	EARLY RESPONSIVE TO DEHYDRATION 15 (ERD15); FUNCTIONS IN: protein binding; INVOLVED IN: response to water deprivation, response to high light intensity, response to bacterium; LOCATED IN: cytoplasm; EXPRESSED IN: 22 plant structures; EXPRESSED DURING: 13 growth stages; BEST Arabidopsis thaliana protein match is: unknown protein (TAIR:AT4G14270.2).	gi|157849736|gb|ABV89651.1|	ERD15 protein [Brassica rapa]
			BnaC04g47690D	46653547	46656071	AT2G41451.1	unknown protein; FUNCTIONS IN: molecular_function unknown; INVOLVED IN: biological_process unknown; LOCATED IN: endomembrane system; BEST Arabidopsis thaliana protein match is: unknown protein (TAIR:AT3G57200.1); Has 30201 Blast hits to 17322 proteins in 780 species: Archae - 12; Bacteria - 1396; Metazoa - 17338; Fungi - 3422; Plants - 5037; Viruses - 0; Other Eukaryotes - 2996 (source: NCBI BLin…	gi|186507176|ref|NP_001118499.1|	uncharacterized protein [Arabidopsis thaliana] &gt;gi|330254889|gb|AEC09983.1| uncharacterized protein AT2G41451 [Arabidopsis thaliana]
			BnaC04g47700D	46656385	46659759	AT2G41460.1	apurinic endonuclease-redox protein (ARP); CONTAINS InterPro DOMAIN/s: AP endonuclease, family 1, conserved site (InterPro:IPR020848), DNA-binding SAP (InterPro:IPR003034), AP endonuclease, family 1 (InterPro:IPR000097), AP endonuclease, family 1, binding site (InterPro:IPR020847), Endonuclease/exonuclease/phosphatase (InterPro:IPR005135), Exodeoxyribonuclease III xth (InterPro:IPR004808); BEST A…	gi|297824099|ref|XP_002879932.1|	apurinic endonuclease-redox protein [Arabidopsis lyrata subsp. lyrata] &gt;gi|297325771|gb|EFH56191.1| apurinic endonuclease-redox protein [Arabidopsis lyrata subsp. lyrata]
			BnaC04g47710D	46660242	46661553	AT2G41475.1	Embryo-specific protein 3, (ATS3); FUNCTIONS IN: molecular_function unknown; INVOLVED IN: biological_process unknown; LOCATED IN: endomembrane system; CONTAINS InterPro DOMAIN/s: Lipase/lipooxygenase, PLAT/LH2 (InterPro:IPR008976), Embryo-specific 3 (InterPro:IPR010417); BEST Arabidopsis thaliana protein match is: Embryo-specific protein 3, (ATS3) (TAIR:AT5G62200.1); Has 30201 Blast hits to 17322…	gi|3241945|gb|AAC23732.1|	unknown protein [Arabidopsis thaliana]
			BnaC04g47720D	46662466	46664125	AT2G41480.1	Peroxidase superfamily protein; FUNCTIONS IN: peroxidase activity, heme binding; INVOLVED IN: oxidation reduction, response to oxidative stress; EXPRESSED IN: root, leaf; EXPRESSED DURING: LP.04 four leaves visible; CONTAINS InterPro DOMAIN/s: Haem peroxidase (InterPro:IPR010255), Plant peroxidase (InterPro:IPR000823), Peroxidases heam-ligand binding site (InterPro:IPR019793), Peroxidase, active …	gi|145360874|ref|NP_181679.3|	putative peroxidase [Arabidopsis thaliana] &gt;gi|330254895|gb|AEC09989.1| putative peroxidase [Arabidopsis thaliana]
			BnaC04g47730D	46665460	46668977	AT2G41500.1	LACHESIS (LIS); CONTAINS InterPro DOMAIN/s: WD40 repeat 2 (InterPro:IPR019782), WD40 repeat, conserved site (InterPro:IPR019775), Pre-mRNA processing factor 4 (PRP4) like (InterPro:IPR014906), WD40 repeat (InterPro:IPR001680), Splicing factor motif (InterPro:IPR003648), G-protein beta WD-40 repeat, region (InterPro:IPR020472), WD40 repeat-like-containing domain (InterPro:IPR011046), WD40-repeat-c…	gi|15227373|ref|NP_181681.1|	splicing factor PRP4-like protein LACHESIS [Arabidopsis thaliana] &gt;gi|3123130|sp|O22212.1|PRP4_ARATH RecName: Full=U4/U6 small nuclear ribonucleoprotein PRP4-like protein; AltName: Full=Protein EMBRYO DEFECTIVE 2776 &gt;gi|2618685|gb|AAB84332.1| putative small nuclear ribonucleoprotein Prp4p [Arabidopsis thaliana] &gt;gi|20197202|gb|AAM14969.1| putative small nuclear ribonucleoprotein Prp4p [A…
			BnaC04g47740D	46681906	46684463	AT2G41510.1	cytokinin oxidase/dehydrogenase 1 (CKX1); FUNCTIONS IN: cytokinin dehydrogenase activity; INVOLVED IN: N-terminal protein myristoylation, cytokinin catabolic process, meristem development; LOCATED IN: vacuole; EXPRESSED IN: lateral root, shoot apex, hypocotyl, root, flower; CONTAINS InterPro DOMAIN/s: Cytokinin dehydrogenase 1, FAD/cytokinin binding domain (InterPro:IPR015345), FAD-binding, type …	gi|15227374|ref|NP_181682.1|	cytokinin dehydrogenase 1 [Arabidopsis thaliana] &gt;gi|66773809|sp|O22213.1|CKX1_ARATH RecName: Full=Cytokinin dehydrogenase 1; AltName: Full=Cytokinin oxidase 1; Short=AtCKX1; Short=CKO 1; Flags: Precursor &gt;gi|2618686|gb|AAB84333.1| putative cytokinin oxidase [Arabidopsis thaliana] &gt;gi|330254898|gb|AEC09992.1| cytokinin dehydrogenase 1 [Arabidopsis thaliana]
			BnaC04g47750D	46685497	46687046	AT2G41550.1	Rho termination factor; FUNCTIONS IN: transcription termination factor activity; INVOLVED IN: transcription termination; LOCATED IN: cellular_component unknown; EXPRESSED IN: 12 plant structures; EXPRESSED DURING: 6 growth stages; CONTAINS InterPro DOMAIN/s: Rho termination factor, N-terminal (InterPro:IPR011112); Has 1046 Blast hits to 715 proteins in 227 species: Archae - 8; Bacteria - 305; Met…	gi|30688700|ref|NP_181686.2|	Rho termination factor [Arabidopsis thaliana] &gt;gi|26452553|dbj|BAC43361.1| unknown protein [Arabidopsis thaliana] &gt;gi|28973185|gb|AAO63917.1| unknown protein [Arabidopsis thaliana] &gt;gi|330254905|gb|AEC09999.1| Rho termination factor [Arabidopsis thaliana]
			BnaC04g47760D	46693751	46699864	AT2G41560.1	autoinhibited Ca(2+)-ATPase, isoform 4 (ACA4); FUNCTIONS IN: calcium-transporting ATPase activity, calmodulin binding; INVOLVED IN: in 6 processes; LOCATED IN: in 6 components; EXPRESSED IN: 25 plant structures; EXPRESSED DURING: 14 growth stages; CONTAINS InterPro DOMAIN/s: ATPase, P-type, ATPase-associated domain (InterPro:IPR008250), ATPase, P-type, calcium-transporting, PMCA-type (InterPro:IP…	gi|297827801|ref|XP_002881783.1|	auto-inhibited Ca(2+)-ATPase, isoform 4 [Arabidopsis lyrata subsp. lyrata] &gt;gi|297327622|gb|EFH58042.1| auto-inhibited Ca(2+)-ATPase, isoform 4 [Arabidopsis lyrata subsp. lyrata]
			BnaC04g47770D	46700160	46701324	AT2G41600.3	Mitochondrial glycoprotein family protein; FUNCTIONS IN: molecular_function unknown; INVOLVED IN: biological_process unknown; LOCATED IN: mitochondrial matrix; EXPRESSED IN: 21 plant structures; EXPRESSED DURING: 13 growth stages; CONTAINS InterPro DOMAIN/s: Mitochondrial glycoprotein (InterPro:IPR003428); BEST Arabidopsis thaliana protein match is: Mitochondrial glycoprotein family protein (TAIR…	gi|145331091|ref|NP_001078037.1|	glycoprotein family protein [Arabidopsis thaliana] &gt;gi|330254910|gb|AEC10004.1| glycoprotein family protein [Arabidopsis thaliana]
			BnaC04g47780D	46701494	46706140	AT2G41620.1	Nucleoporin interacting component (Nup93/Nic96-like) family protein; FUNCTIONS IN: protein binding; INVOLVED IN: transport; LOCATED IN: nucleolus; EXPRESSED IN: 24 plant structures; EXPRESSED DURING: 15 growth stages; CONTAINS InterPro DOMAIN/s: Nucleoporin interacting component Nup93/Nic96 (InterPro:IPR007231); BEST Arabidopsis thaliana protein match is: Nucleoporin interacting component (Nup93/…	gi|18405761|ref|NP_565951.1|	Nup93/Nic96 nucleoporin interacting component-containing protein [Arabidopsis thaliana] &gt;gi|21542465|sp|O22224.2|Y2162_ARATH RecName: Full=Uncharacterized protein At2g41620 &gt;gi|14334432|gb|AAK59414.1| unknown protein [Arabidopsis thaliana] &gt;gi|20196948|gb|AAB84345.2| expressed protein [Arabidopsis thaliana] &gt;gi|21281026|gb|AAM44953.1| unknown protein [Arabidopsis thaliana] &gt;gi|3302…
			BnaC04g47790D	46711781	46712696	AT2G41660.1	mizu-kussei 1 (MIZ1); CONTAINS InterPro DOMAIN/s: Protein of unknown function DUF617, plant (InterPro:IPR006460); BEST Arabidopsis thaliana protein match is: Protein of unknown function, DUF617 (TAIR:AT3G25640.1); Has 258 Blast hits to 256 proteins in 14 species: Archae - 0; Bacteria - 0; Metazoa - 0; Fungi - 0; Plants - 258; Viruses - 0; Other Eukaryotes - 0 (source: NCBI BLink).	gi|21593037|gb|AAM64986.1|	unknown [Arabidopsis thaliana]
			BnaC04g47800D	46728018	46728458	-		-	-
			BnaC04g47810D	46730308	46732288	AT2G41705.2	camphor resistance CrcB family protein; CONTAINS InterPro DOMAIN/s: Camphor resistance CrcB protein (InterPro:IPR003691); Has 1596 Blast hits to 1594 proteins in 702 species: Archae - 22; Bacteria - 1268; Metazoa - 2; Fungi - 87; Plants - 37; Viruses - 0; Other Eukaryotes - 180 (source: NCBI BLink).	gi|18405782|ref|NP_565956.1|	camphor resistance CrcB-like protein [Arabidopsis thaliana] &gt;gi|238479528|ref|NP_001154568.1| camphor resistance CrcB-like protein [Arabidopsis thaliana] &gt;gi|20196897|gb|AAM14827.1| Expressed protein [Arabidopsis thaliana] &gt;gi|26453266|dbj|BAC43706.1| unknown protein [Arabidopsis thaliana] &gt;gi|330254925|gb|AEC10019.1| camphor resistance CrcB-like protein [Arabidopsis thaliana] &gt;gi|…
			BnaC04g47820D	46736595	46738096	AT2G41800.1	FUNCTIONS IN: molecular_function unknown; INVOLVED IN: biological_process unknown; LOCATED IN: cell wall, plant-type cell wall; EXPRESSED IN: 7 plant structures; EXPRESSED DURING: 4 anthesis, C globular stage, petal differentiation and expansion stage; CONTAINS InterPro DOMAIN/s: Protein of unknown function DUF642 (InterPro:IPR006946), Galactose-binding domain-like (InterPro:IPR008979); BEST Arab…	gi|15227437|ref|NP_181711.1|	uncharacterized protein [Arabidopsis thaliana] &gt;gi|2335099|gb|AAC02768.1| unknown protein [Arabidopsis thaliana] &gt;gi|17979520|gb|AAL50095.1| At2g41800/T11A7.10 [Arabidopsis thaliana] &gt;gi|20453311|gb|AAM19894.1| At2g41800/T11A7.10 [Arabidopsis thaliana] &gt;gi|330254940|gb|AEC10034.1| uncharacterized protein AT2G41800 [Arabidopsis thaliana]
			BnaC04g47830D	46746590	46747933	AT2G41820.1	Leucine-rich repeat protein kinase family protein; FUNCTIONS IN: protein serine/threonine kinase activity, kinase activity, ATP binding; INVOLVED IN: transmembrane receptor protein tyrosine kinase signaling pathway, protein amino acid phosphorylation; LOCATED IN: plasma membrane; EXPRESSED IN: 20 plant structures; EXPRESSED DURING: 13 growth stages; CONTAINS InterPro DOMAIN/s: Protein kinase, cat…	gi|15227441|ref|NP_181713.1|	leucine-rich repeat receptor-like tyrosine-protein kinase [Arabidopsis thaliana] &gt;gi|75097645|sp|O22938.1|Y2182_ARATH RecName: Full=Leucine-rich repeat receptor-like tyrosine-protein kinase At2g41820; Flags: Precursor &gt;gi|2335097|gb|AAC02766.1| putative receptor-like protein kinase [Arabidopsis thaliana] &gt;gi|224589547|gb|ACN59307.1| leucine-rich repeat receptor-like protein kinase [Arabi…
			BnaC04g47840D	46748003	46749607	AT2G41820.1	Leucine-rich repeat protein kinase family protein; FUNCTIONS IN: protein serine/threonine kinase activity, kinase activity, ATP binding; INVOLVED IN: transmembrane receptor protein tyrosine kinase signaling pathway, protein amino acid phosphorylation; LOCATED IN: plasma membrane; EXPRESSED IN: 20 plant structures; EXPRESSED DURING: 13 growth stages; CONTAINS InterPro DOMAIN/s: Protein kinase, cat…	gi|15227441|ref|NP_181713.1|	leucine-rich repeat receptor-like tyrosine-protein kinase [Arabidopsis thaliana] &gt;gi|75097645|sp|O22938.1|Y2182_ARATH RecName: Full=Leucine-rich repeat receptor-like tyrosine-protein kinase At2g41820; Flags: Precursor &gt;gi|2335097|gb|AAC02766.1| putative receptor-like protein kinase [Arabidopsis thaliana] &gt;gi|224589547|gb|ACN59307.1| leucine-rich repeat receptor-like protein kinase [Arabi…
			BnaC04g47850D	46749893	46755940	AT2G41830.1	Uncharacterized protein; LOCATED IN: plasma membrane; EXPRESSED IN: 19 plant structures; EXPRESSED DURING: 7 growth stages; BEST Arabidopsis thaliana protein match is: Uncharacterized protein (TAIR:AT5G21080.1); Has 35333 Blast hits to 34131 proteins in 2444 species: Archae - 798; Bacteria - 22429; Metazoa - 974; Fungi - 991; Plants - 531; Viruses - 0; Other Eukaryotes - 9610 (source: NCBI BLink).	gi|42569848|ref|NP_181714.3|	uncharacterized protein [Arabidopsis thaliana] &gt;gi|330254943|gb|AEC10037.1| uncharacterized protein AT2G41830 [Arabidopsis thaliana]
			BnaC04g47860D	46756784	46758232	AT2G41835.1	zinc finger (C2H2 type, AN1-like) family protein; FUNCTIONS IN: zinc ion binding, nucleic acid binding; INVOLVED IN: biological_process unknown; LOCATED IN: intracellular; CONTAINS InterPro DOMAIN/s: Zinc finger, C2H2-like (InterPro:IPR015880), Zinc finger, AN1-type (InterPro:IPR000058), Zinc finger, C2H2-type (InterPro:IPR007087); BEST Arabidopsis thaliana protein match is: zinc finger (C2H2 typ…	gi|30688811|ref|NP_850358.1|	zinc finger (C2H2 type, AN1-like) family protein [Arabidopsis thaliana] &gt;gi|75331162|sp|Q8VZ42.1|SAP11_ARATH RecName: Full=Zinc finger AN1 and C2H2 domain-containing stress-associated protein 11; Short=AtSAP11 &gt;gi|17529076|gb|AAL38748.1| unknown protein [Arabidopsis thaliana] &gt;gi|20465575|gb|AAM20270.1| unknown protein [Arabidopsis thaliana] &gt;gi|330254944|gb|AEC10038.1| zinc finger (C…
			BnaC04g47870D	46758536	46760554	AT1G58684.1	Ribosomal protein S5 family protein; FUNCTIONS IN: structural constituent of ribosome, RNA binding; INVOLVED IN: translation; LOCATED IN: cytosolic small ribosomal subunit, ribosome, cell wall, intracellular; CONTAINS InterPro DOMAIN/s: Ribosomal protein S5, eukaryotic/archaeal (InterPro:IPR005711), Ribosomal protein S5, N-terminal (InterPro:IPR013810), Double-stranded RNA-binding-like (InterPro:…	gi|18406325|ref|NP_564737.1|	40S ribosomal protein S2-2 [Arabidopsis thaliana] &gt;gi|18406353|ref|NP_564740.1| 40S ribosomal protein S2-2 [Arabidopsis thaliana] &gt;gi|22330310|ref|NP_683443.1| 40S ribosomal protein S2-2 [Arabidopsis thaliana] &gt;gi|75305702|sp|Q93VB8.1|RS22_ARATH RecName: Full=40S ribosomal protein S2-2 &gt;gi|14475933|gb|AAK62780.1|AC027036_1 ribosomal protein S2, putative [Arabidopsis thaliana] &gt;gi|1…
			BnaC04g47880D	46761087	46763266	AT2G41850.1	polygalacturonase abscission zone A. thaliana (PGAZAT); FUNCTIONS IN: polygalacturonase activity; INVOLVED IN: cell wall modification involved in abscission, fruit dehiscence, floral organ abscission, anther dehiscence, carbohydrate metabolic process; LOCATED IN: endomembrane system; EXPRESSED IN: 6 plant structures; EXPRESSED DURING: 4 anthesis; CONTAINS InterPro DOMAIN/s: Pectin lyase fold/viru…	gi|9967518|emb|CAC05657.1|	endopolygalacturonase [Brassica napus] &gt;gi|9967520|emb|CAC05658.1| endopolygalacturonase [Brassica napus]
			BnaC04g47890D	46768840	46771446	-		gi|297788324|ref|XP_002862288.1|	predicted protein [Arabidopsis lyrata subsp. lyrata] &gt;gi|297307638|gb|EFH38546.1| predicted protein [Arabidopsis lyrata subsp. lyrata]
			BnaC04g47900D	46773693	46775949	AT2G41860.2	calcium-dependent protein kinase 14 (CPK14); FUNCTIONS IN: in 6 functions; INVOLVED IN: protein amino acid phosphorylation; LOCATED IN: cytoplasm; EXPRESSED IN: 9 plant structures; EXPRESSED DURING: L mature pollen stage, M germinated pollen stage, 4 anthesis, C globular stage, petal differentiation and expansion stage; CONTAINS InterPro DOMAIN/s: Protein kinase, ATP binding site (InterPro:IPR017…	gi|297827845|ref|XP_002881805.1|	calcium-dependent protein kinase 14 [Arabidopsis lyrata subsp. lyrata] &gt;gi|297327644|gb|EFH58064.1| calcium-dependent protein kinase 14 [Arabidopsis lyrata subsp. lyrata]
			BnaC04g47910D	46777230	46778850	AT4G13770.1	cytochrome P450, family 83, subfamily A, polypeptide 1 (CYP83A1); CONTAINS InterPro DOMAIN/s: Cytochrome P450 (InterPro:IPR001128), Cytochrome P450, conserved site (InterPro:IPR017972), Cytochrome P450, E-class, group I (InterPro:IPR002401); BEST Arabidopsis thaliana protein match is: cytochrome P450, family 83, subfamily B, polypeptide 1 (TAIR:AT4G31500.1); Has 34068 Blast hits to 33780 proteins…	gi|237682418|gb|ACR10258.1|	cytochrome P450 83a1 [Brassica rapa subsp. pekinensis]
			BnaC04g47920D	46798355	46801124	AT1G58260.1	cytochrome p450 79c2 (CYP79C2); FUNCTIONS IN: electron carrier activity, monooxygenase activity, iron ion binding, oxygen binding, heme binding; INVOLVED IN: oxidation reduction; LOCATED IN: endomembrane system; CONTAINS InterPro DOMAIN/s: Cytochrome P450 (InterPro:IPR001128), Cytochrome P450, E-class, group I (InterPro:IPR002401), Cytochrome P450, conserved site (InterPro:IPR017972); BEST Arabid…	gi|30696238|ref|NP_176122.2|	cytochrome p450 79c2 [Arabidopsis thaliana] &gt;gi|8979947|gb|AAF82261.1|AC008051_12 Strong similarity to N-hydroxylating multifunctional cytochrome P-450 (CYP79) from Sorghum bicolor gb|U32624 and contains a Cytochrome P450 PF|00067 domain [Arabidopsis thaliana] &gt;gi|12321833|gb|AAG50952.1|AC073943_2 cytochrome P450, putative [Arabidopsis thaliana] &gt;gi|332195404|gb|AEE33525.1| cytochrome p4…
			BnaC04g47930D	46811437	46811584	-		-	-
			BnaC04g47940D	46811782	46817234	-		-	-
			BnaC04g47950D	46817295	46817664	AT4G39090.1	RESPONSIVE TO DEHYDRATION 19 (RD19); CONTAINS InterPro DOMAIN/s: Peptidase C1A, papain (InterPro:IPR013128), Proteinase inhibitor I29, cathepsin propeptide (InterPro:IPR013201), Peptidase C1A, papain C-terminal (InterPro:IPR000668), Peptidase, cysteine peptidase active site (InterPro:IPR000169); BEST Arabidopsis thaliana protein match is: Papain family cysteine protease (TAIR:AT2G21430.1); Has 30…	gi|18141287|gb|AAL60581.1|AF454959_1	senescence-associated cysteine protease [Brassica oleracea]
			BnaC04g47960D	46824501	46825959	AT2G41890.1	curculin-like (mannose-binding) lectin family protein / PAN domain-containing protein; FUNCTIONS IN: sugar binding, protein kinase activity, ATP binding; INVOLVED IN: protein amino acid phosphorylation, recognition of pollen; LOCATED IN: endomembrane system; EXPRESSED IN: 22 plant structures; EXPRESSED DURING: 13 growth stages; CONTAINS InterPro DOMAIN/s: Curculin-like (mannose-binding) lectin (I…	gi|15227459|ref|NP_181720.1|	G-type lectin S-receptor-like serine/threonine-protein kinase SD3-1 [Arabidopsis thaliana] &gt;gi|75319139|sp|P93756.1|SD31_ARATH RecName: Full=G-type lectin S-receptor-like serine/threonine-protein kinase SD3-1; AltName: Full=S-domain-3 (SD3) receptor kinase 1; Short=SD3-1; Flags: Precursor &gt;gi|1871193|gb|AAB63553.1| putative receptor-like protein kinase [Arabidopsis thaliana] &gt;gi|20196890…
			BnaC04g47970D	46832067	46832942	AT5G14530.1	Transducin/WD40 repeat-like superfamily protein; CONTAINS InterPro DOMAIN/s: WD40 repeat 2 (InterPro:IPR019782), WD40 repeat, conserved site (InterPro:IPR019775), WD40 repeat (InterPro:IPR001680), G-protein beta WD-40 repeat, region (InterPro:IPR020472), WD40 repeat-like-containing domain (InterPro:IPR011046), WD40-repeat-containing domain (InterPro:IPR017986), WD40/YVTN repeat-like-containing do…	gi|297811581|ref|XP_002873674.1|	transducin family protein [Arabidopsis lyrata subsp. lyrata] &gt;gi|297319511|gb|EFH49933.1| transducin family protein [Arabidopsis lyrata subsp. lyrata]
			BnaC04g47980D	46835161	46839817	-		-	-
			BnaC04g47990D	46839884	46843023	AT2G41900.1	CCCH-type zinc finger protein with ARM repeat domain; CONTAINS InterPro DOMAIN/s: Zinc finger, CCCH-type (InterPro:IPR000571), Ankyrin repeat-containing domain (InterPro:IPR020683), Ankyrin repeat (InterPro:IPR002110); BEST Arabidopsis thaliana protein match is: CCCH-type zinc finger protein with ARM repeat domain (TAIR:AT5G12850.1); Has 5399 Blast hits to 3519 proteins in 384 species: Archae - 1…	gi|18405834|ref|NP_565962.1|	zinc finger CCCH domain-containing protein 30 [Arabidopsis thaliana] &gt;gi|75220498|sp|P93755.2|C3H30_ARATH RecName: Full=Zinc finger CCCH domain-containing protein 30; Short=AtC3H30 &gt;gi|14335106|gb|AAK59832.1| At2g41900/T6D20.20 [Arabidopsis thaliana] &gt;gi|20198317|gb|AAB63552.2| putative CCCH-type zinc finger protein [Arabidopsis thaliana] &gt;gi|20334714|gb|AAM16218.1| At2g41900/T6D20.20…
C08_21120661	21120661	chrC08	BnaC08g17390D	20993383	20993879	AT1G10000.1	Ribonuclease H-like superfamily protein; FUNCTIONS IN: ribonuclease H activity, nucleic acid binding; INVOLVED IN: biological_process unknown; EXPRESSED IN: 18 plant structures; EXPRESSED DURING: 12 growth stages; CONTAINS InterPro DOMAIN/s: Polynucleotidyl transferase, ribonuclease H fold (InterPro:IPR012337), RNA-directed DNA polymerase (reverse transcriptase), related (InterPro:IPR015706), Rib…	gi|15218368|ref|NP_172471.1|	ribonuclease H-like protein [Arabidopsis thaliana] &gt;gi|332190406|gb|AEE28527.1| ribonuclease H-like protein [Arabidopsis thaliana]
			BnaC08g17400D	21060303	21062138	-		-	-
			BnaC08g17410D	21064818	21067178	AT1G17520.1	Homeodomain-like/winged-helix DNA-binding family protein; FUNCTIONS IN: DNA binding, sequence-specific DNA binding transcription factor activity; INVOLVED IN: in 6 processes; LOCATED IN: nucleus, nucleosome; EXPRESSED IN: 11 plant structures; EXPRESSED DURING: 7 growth stages; CONTAINS InterPro DOMAIN/s: Winged helix-turn-helix transcription repressor DNA-binding (InterPro:IPR011991), SANT, DNA-b…	gi|30685367|ref|NP_173195.2|	putative telomere repeat-binding factor 4 [Arabidopsis thaliana] &gt;gi|332191480|gb|AEE29601.1| telomere repeat-binding factor 4 [Arabidopsis thaliana]
			BnaC08g17420D	21067350	21067908	AT1G17530.1	translocase of inner mitochondrial membrane 23 (TIM23-1); CONTAINS InterPro DOMAIN/s: Mitochondrial inner membrane translocase complex, subunit Tim23 (InterPro:IPR005681), Mitochondrial inner membrane translocase complex, subunit Tim17/22 (InterPro:IPR003397); BEST Arabidopsis thaliana protein match is: translocase inner membrane subunit 23-2 (TAIR:AT1G72750.1); Has 791 Blast hits to 791 proteins…	gi|18394498|ref|NP_564028.1|	translocase of inner mitochondrial membrane 23 [Arabidopsis thaliana] &gt;gi|75175255|sp|Q9LNQ1.1|TI231_ARATH RecName: Full=Mitochondrial import inner membrane translocase subunit TIM23-1 &gt;gi|8778460|gb|AAF79468.1|AC022492_12 F1L3.24 [Arabidopsis thaliana] &gt;gi|15010570|gb|AAK73944.1| At1g17530/F11A6.4 [Arabidopsis thaliana] &gt;gi|20147387|gb|AAM10403.1| At1g17530/F11A6.4 [Arabidopsis thali…
			BnaC08g17430D	21068599	21072163	AT1G17540.1	Protein kinase protein with adenine nucleotide alpha hydrolases-like domain; FUNCTIONS IN: kinase activity; INVOLVED IN: protein amino acid phosphorylation, response to stress; LOCATED IN: cellular_component unknown; EXPRESSED IN: 9 plant structures; EXPRESSED DURING: L mature pollen stage, M germinated pollen stage, 4 anthesis, C globular stage, petal differentiation and expansion stage; CONTAIN…	gi|79346254|ref|NP_173197.2|	protein kinase protein with adenine nucleotide alpha hydrolases-like domain [Arabidopsis thaliana] &gt;gi|51969566|dbj|BAD43475.1| putative protein kinase [Arabidopsis thaliana] &gt;gi|332191482|gb|AEE29603.1| protein kinase protein with adenine nucleotide alpha hydrolases-like domain [Arabidopsis thaliana]
			BnaC08g17440D	21072683	21074652	AT1G17550.1	homology to ABI2 (HAB2); FUNCTIONS IN: protein serine/threonine phosphatase activity, catalytic activity; INVOLVED IN: protein amino acid dephosphorylation; LOCATED IN: protein serine/threonine phosphatase complex; EXPRESSED IN: 23 plant structures; EXPRESSED DURING: 14 growth stages; CONTAINS InterPro DOMAIN/s: Protein phosphatase 2C, manganese/magnesium aspartate binding site (InterPro:IPR00022…	gi|455659660|gb|AGG35980.1|	hypersensitive to ABA 2 [Brassica napus]
			BnaC08g17450D	21076109	21081920	AT5G48770.1	Disease resistance protein (TIR-NBS-LRR class) family; FUNCTIONS IN: transmembrane receptor activity, ATP binding; INVOLVED IN: signal transduction, apoptosis, defense response, innate immune response; LOCATED IN: intrinsic to membrane; CONTAINS InterPro DOMAIN/s: NB-ARC (InterPro:IPR002182), Leucine-rich repeat (InterPro:IPR001611), Toll-Interleukin receptor (InterPro:IPR000157), Disease resista…	gi|227438199|gb|ACP30589.1|	disease resistance protein [Brassica rapa subsp. pekinensis]
			BnaC08g17460D	21083998	21084778	AT1G17620.1	Late embryogenesis abundant (LEA) hydroxyproline-rich glycoprotein family; FUNCTIONS IN: molecular_function unknown; INVOLVED IN: biological_process unknown; LOCATED IN: plasma membrane; EXPRESSED IN: 23 plant structures; EXPRESSED DURING: 13 growth stages; CONTAINS InterPro DOMAIN/s: Late embryogenesis abundant protein, group 2 (InterPro:IPR004864); BEST Arabidopsis thaliana protein match is: un…	gi|11762174|gb|AAG40365.1|AF325013_1	At1g17620 [Arabidopsis thaliana]
			BnaC08g17470D	21090758	21091223	AT1G17640.1	RNA-binding (RRM/RBD/RNP motifs) family protein; FUNCTIONS IN: RNA binding, nucleotide binding, nucleic acid binding; INVOLVED IN: biological_process unknown; LOCATED IN: cellular_component unknown; EXPRESSED IN: 15 plant structures; EXPRESSED DURING: 7 growth stages; CONTAINS InterPro DOMAIN/s: RNA recognition motif, RNP-1 (InterPro:IPR000504), Nucleotide-binding, alpha-beta plait (InterPro:IPR0…	gi|15220810|ref|NP_173208.1|	RNA recognition motif-containing protein [Arabidopsis thaliana] &gt;gi|332191496|gb|AEE29617.1| RNA recognition motif-containing protein [Arabidopsis thaliana]
			BnaC08g17480D	21092114	21097627	AT1G17690.1	FUNCTIONS IN: molecular_function unknown; INVOLVED IN: biological_process unknown; LOCATED IN: nucleus; EXPRESSED IN: 24 plant structures; EXPRESSED DURING: 13 growth stages; CONTAINS InterPro DOMAIN/s: Digestive organ expansion factor, predicted (InterPro:IPR010678); Has 25006 Blast hits to 13379 proteins in 904 species: Archae - 102; Bacteria - 5571; Metazoa - 7448; Fungi - 3168; Plants - 1056;…	gi|18394518|ref|NP_564032.1|	uncharacterized protein [Arabidopsis thaliana] &gt;gi|23297505|gb|AAN12983.1| unknown protein [Arabidopsis thaliana] &gt;gi|332191501|gb|AEE29622.1| uncharacterized protein AT1G17690 [Arabidopsis thaliana]
			BnaC08g17490D	21099019	21100190	AT1G17710.1	Pyridoxal phosphate phosphatase-related protein; FUNCTIONS IN: phosphatase activity; INVOLVED IN: metabolic process; EXPRESSED IN: 9 plant structures; EXPRESSED DURING: L mature pollen stage, M germinated pollen stage, 4 anthesis, petal differentiation and expansion stage; CONTAINS InterPro DOMAIN/s: Pyridoxal phosphate phosphatase, PHOSPHO2 (InterPro:IPR016965), HAD-superfamily hydrolase, subfam…	gi|297850166|ref|XP_002892964.1|	phosphoric monoester hydrolase [Arabidopsis lyrata subsp. lyrata] &gt;gi|297338806|gb|EFH69223.1| phosphoric monoester hydrolase [Arabidopsis lyrata subsp. lyrata]
			BnaC08g17500D	21102099	21106050	AT1G17720.2	ATB BETA; CONTAINS InterPro DOMAIN/s: WD40 repeat-like-containing domain (InterPro:IPR011046), Protein phosphatase 2A, regulatory subunit PR55 (InterPro:IPR000009), Protein phosphatase 2A, regulatory subunit PR55, conserved site (InterPro:IPR018067), WD40 repeat, conserved site (InterPro:IPR019775), WD40/YVTN repeat-like-containing domain (InterPro:IPR015943), WD40 repeat (InterPro:IPR001680), WD…	gi|30685484|ref|NP_849681.1|	serine/threonine protein phosphatase 2A 55 kDa regulatory subunit B beta isoform [Arabidopsis thaliana] &gt;gi|9802743|gb|AAF99812.1|AC034257_4 type 2A protein serine/threonine phosphatase 55kDa B regulatory subunit [Arabidopsis thaliana] &gt;gi|13877637|gb|AAK43896.1|AF370519_1 type 2A protein serine/threonine phosphatase 55kDa B regulatory subunit [Arabidopsis thaliana] &gt;gi|25084199|gb|AAN72…
			BnaC08g17510D	21106106	21106667	AT1G17720.2	ATB BETA; CONTAINS InterPro DOMAIN/s: WD40 repeat-like-containing domain (InterPro:IPR011046), Protein phosphatase 2A, regulatory subunit PR55 (InterPro:IPR000009), Protein phosphatase 2A, regulatory subunit PR55, conserved site (InterPro:IPR018067), WD40 repeat, conserved site (InterPro:IPR019775), WD40/YVTN repeat-like-containing domain (InterPro:IPR015943), WD40 repeat (InterPro:IPR001680), WD…	gi|30685484|ref|NP_849681.1|	serine/threonine protein phosphatase 2A 55 kDa regulatory subunit B beta isoform [Arabidopsis thaliana] &gt;gi|9802743|gb|AAF99812.1|AC034257_4 type 2A protein serine/threonine phosphatase 55kDa B regulatory subunit [Arabidopsis thaliana] &gt;gi|13877637|gb|AAK43896.1|AF370519_1 type 2A protein serine/threonine phosphatase 55kDa B regulatory subunit [Arabidopsis thaliana] &gt;gi|25084199|gb|AAN72…
			BnaC08g17520D	21112581	21117180	AT1G17745.1	3-phosphoglycerate dehydrogenase (PGDH); FUNCTIONS IN: phosphoglycerate dehydrogenase activity, protein binding; INVOLVED IN: L-serine biosynthetic process; LOCATED IN: cytosol, nucleus, chloroplast; EXPRESSED IN: 24 plant structures; EXPRESSED DURING: 14 growth stages; CONTAINS InterPro DOMAIN/s: D-3-phosphoglycerate dehydrogenase (InterPro:IPR006236), D-isomer specific 2-hydroxyacid dehydrogena…	gi|18394525|ref|NP_564034.1|	D-3-phosphoglycerate dehydrogenase [Arabidopsis thaliana] &gt;gi|3122858|sp|O04130.2|SERA_ARATH RecName: Full=D-3-phosphoglycerate dehydrogenase, chloroplastic; Short=3-PGDH; Flags: Precursor &gt;gi|9802747|gb|AAF99816.1|AC034257_8 D-3-phosphoglycerate dehydrogenase [Arabidopsis thaliana] &gt;gi|2189964|dbj|BAA20405.1| Phosphoglycerate dehydrogenase [Arabidopsis thaliana] &gt;gi|2804258|dbj|BAA24…
			BnaC08g17530D	21117434	21123208	AT1G17760.1	CSTF77; FUNCTIONS IN: protein binding, mRNA binding, transcription repressor activity; INVOLVED IN: RNA 3'-end processing, mRNA processing, embryo sac development; LOCATED IN: intracellular, nucleus; EXPRESSED IN: 23 plant structures; EXPRESSED DURING: 12 growth stages; CONTAINS InterPro DOMAIN/s: RNA-processing protein, HAT helix (InterPro:IPR003107), Tetratricopeptide-like helical (InterPro:IPR…	gi|297850170|ref|XP_002892966.1|	cleavage stimulation factor 77 [Arabidopsis lyrata subsp. lyrata] &gt;gi|297338808|gb|EFH69225.1| cleavage stimulation factor 77 [Arabidopsis lyrata subsp. lyrata]
			BnaC08g17540D	21126050	21127597	AT1G17780.2	unknown protein; BEST Arabidopsis thaliana protein match is: unknown protein (TAIR:AT2G16575.1); Has 35333 Blast hits to 34131 proteins in 2444 species: Archae - 798; Bacteria - 22429; Metazoa - 974; Fungi - 991; Plants - 531; Viruses - 0; Other Eukaryotes - 9610 (source: NCBI BLink).	gi|42571523|ref|NP_973852.1|	uncharacterized protein [Arabidopsis thaliana] &gt;gi|332191514|gb|AEE29635.1| uncharacterized protein AT1G17780 [Arabidopsis thaliana]
			BnaC08g17550D	21127658	21129614	AT1G17790.1	DNA-binding bromodomain-containing protein; FUNCTIONS IN: DNA binding; INVOLVED IN: biological_process unknown; LOCATED IN: chloroplast; EXPRESSED IN: 18 plant structures; EXPRESSED DURING: 9 growth stages; CONTAINS InterPro DOMAIN/s: Bromodomain (InterPro:IPR001487); BEST Arabidopsis thaliana protein match is: global transcription factor group E3 (TAIR:AT1G73150.1); Has 10948 Blast hits to 7134 …	gi|1313926|emb|CAA66267.1|	non intermediate filament IFA binding protein [Brassica oleracea var. botrytis]
			BnaC08g17560D	21132319	21134523	AT1G17830.1	Protein of unknown function (DUF789); CONTAINS InterPro DOMAIN/s: Protein of unknown function DUF789 (InterPro:IPR008507); BEST Arabidopsis thaliana protein match is: Protein of unknown function (DUF789) (TAIR:AT1G73210.1); Has 265 Blast hits to 257 proteins in 18 species: Archae - 0; Bacteria - 0; Metazoa - 0; Fungi - 0; Plants - 263; Viruses - 0; Other Eukaryotes - 2 (source: NCBI BLink).	gi|21593308|gb|AAM65257.1|	unknown [Arabidopsis thaliana]
			BnaC08g17570D	21137212	21140618	AT1G17840.1	white-brown complex homolog protein 11 (WBC11); FUNCTIONS IN: ATPase activity, coupled to transmembrane movement of substances, fatty acid transporter activity; INVOLVED IN: cutin transport, fatty acid transport; LOCATED IN: plasma membrane, external side of plasma membrane; EXPRESSED IN: 26 plant structures; EXPRESSED DURING: 13 growth stages; CONTAINS InterPro DOMAIN/s: ATPase, AAA+ type, core …	gi|22329638|ref|NP_173226.2|	ABC transporter G family member 11 [Arabidopsis thaliana] &gt;gi|75330766|sp|Q8RXN0.1|AB11G_ARATH RecName: Full=ABC transporter G family member 11; Short=ABC transporter ABCG.11; Short=AtABCG11; AltName: Full=Protein CUTICULAR DEFECT AND ORGAN FUSION 1; AltName: Full=Protein DESPERADO; AltName: Full=Protein PERMEABLE LEAVES 1; AltName: Full=White-brown complex homolog protein 11; Short=AtWBC11 &g…
			BnaC08g17580D	21144103	21144397	AT1G36970.1	CONTAINS InterPro DOMAIN/s: Domain of unknown function DUF1985 (InterPro:IPR015410); BEST Arabidopsis thaliana protein match is: Domain of unknown function (DUF1985) (TAIR:AT1G31150.1); Has 123 Blast hits to 120 proteins in 7 species: Archae - 0; Bacteria - 0; Metazoa - 0; Fungi - 4; Plants - 119; Viruses - 0; Other Eukaryotes - 0 (source: NCBI BLink).	-	-
			BnaC08g17590D	21148810	21149398	AT1G17860.1	Kunitz family trypsin and protease inhibitor protein; FUNCTIONS IN: endopeptidase inhibitor activity; INVOLVED IN: biological_process unknown; LOCATED IN: apoplast, cell wall; EXPRESSED IN: 17 plant structures; EXPRESSED DURING: 13 growth stages; CONTAINS InterPro DOMAIN/s: Proteinase inhibitor I3, Kunitz legume (InterPro:IPR002160), Kunitz inhibitor ST1-like (InterPro:IPR011065); BEST Arabidopsi…	gi|297844742|ref|XP_002890252.1|	trypsin and protease inhibitor family protein [Arabidopsis lyrata subsp. lyrata] &gt;gi|297336094|gb|EFH66511.1| trypsin and protease inhibitor family protein [Arabidopsis lyrata subsp. lyrata]
			BnaC08g17600D	21149466	21151165	AT1G17880.1	basic transcription factor 3 (BTF3); FUNCTIONS IN: sequence-specific DNA binding transcription factor activity; INVOLVED IN: response to salt stress; LOCATED IN: cellular_component unknown; EXPRESSED IN: 24 plant structures; EXPRESSED DURING: 15 growth stages; CONTAINS InterPro DOMAIN/s: Nascent polypeptide-associated complex NAC (InterPro:IPR002715); BEST Arabidopsis thaliana protein match is: N…	gi|470126975|ref|XP_004299455.1|	PREDICTED: transcription factor BTF3-like isoform 1 [Fragaria vesca subsp. vesca] &gt;gi|470126977|ref|XP_004299456.1| PREDICTED: transcription factor BTF3-like isoform 2 [Fragaria vesca subsp. vesca]
			BnaC08g17610D	21152958	21155623	AT1G17920.1	homeodomain GLABROUS 12 (HDG12); FUNCTIONS IN: sequence-specific DNA binding transcription factor activity; INVOLVED IN: trichome branching, regulation of transcription, DNA-dependent; LOCATED IN: nucleus; EXPRESSED IN: 25 plant structures; EXPRESSED DURING: 11 growth stages; CONTAINS InterPro DOMAIN/s: Homeobox, conserved site (InterPro:IPR017970), Homeobox (InterPro:IPR001356), Homeodomain-like…	gi|15219456|ref|NP_177479.1|	homeobox-leucine zipper protein HDG11 [Arabidopsis thaliana] &gt;gi|75263138|sp|Q9FX31.1|HDG11_ARATH RecName: Full=Homeobox-leucine zipper protein HDG11; AltName: Full=HD-ZIP protein HDG11; AltName: Full=Homeodomain GLABRA 2-like protein 11; AltName: Full=Homeodomain transcription factor HDG11; AltName: Full=Protein HOMEODOMAIN GLABROUS 11 &gt;gi|11120798|gb|AAG30978.1|AC012396_14 homeobox protei…
			BnaC08g17620D	21159943	21160360	-		-	-
			BnaC08g17630D	21160418	21161220	AT3G53310.1	AP2/B3-like transcriptional factor family protein; FUNCTIONS IN: DNA binding, sequence-specific DNA binding transcription factor activity; INVOLVED IN: regulation of transcription, DNA-dependent; LOCATED IN: endomembrane system; EXPRESSED IN: 15 plant structures; EXPRESSED DURING: 13 growth stages; CONTAINS InterPro DOMAIN/s: Transcriptional factor B3 (InterPro:IPR003340); BEST Arabidopsis thalia…	gi|6729482|emb|CAB67638.1|	putative protein [Arabidopsis thaliana]
			BnaC08g17640D	21161505	21161604	AT1G17930.1	Aminotransferase-like, plant mobile domain family protein; FUNCTIONS IN: molecular_function unknown; INVOLVED IN: biological_process unknown; LOCATED IN: cellular_component unknown; EXPRESSED IN: 25 plant structures; EXPRESSED DURING: 13 growth stages; CONTAINS InterPro DOMAIN/s: Aminotransferase-like, plant mobile domain (InterPro:IPR019557); BEST Arabidopsis thaliana protein match is: Aminotran…	gi|21553489|gb|AAM62582.1|	unknown [Arabidopsis thaliana]
			BnaC08g17650D	21168397	21169065	AT1G17950.1	myb domain protein 52 (MYB52); CONTAINS InterPro DOMAIN/s: SANT, DNA-binding (InterPro:IPR001005), Homeodomain-like (InterPro:IPR009057), Myb, DNA-binding (InterPro:IPR014778), HTH transcriptional regulator, Myb-type, DNA-binding (InterPro:IPR017930), Homeodomain-related (InterPro:IPR012287), Myb transcription factor (InterPro:IPR015495); BEST Arabidopsis thaliana protein match is: myb domain pro…	gi|15220910|ref|NP_173237.1|	myb domain protein 52 [Arabidopsis thaliana] &gt;gi|41619102|gb|AAS10024.1| MYB transcription factor [Arabidopsis thaliana] &gt;gi|332191534|gb|AEE29655.1| myb domain protein 52 [Arabidopsis thaliana]
			BnaC08g17660D	21176463	21178395	AT5G10530.1	Concanavalin A-like lectin protein kinase family protein; FUNCTIONS IN: kinase activity; INVOLVED IN: protein amino acid phosphorylation; LOCATED IN: endomembrane system; EXPRESSED IN: root; CONTAINS InterPro DOMAIN/s: Legume lectin, beta chain (InterPro:IPR001220), Protein kinase, ATP binding site (InterPro:IPR017441), Serine/threonine-protein kinase-like domain (InterPro:IPR017442), Concanavali…	gi|15238190|ref|NP_196615.1|	L-type lectin-domain containing receptor kinase IX.1 [Arabidopsis thaliana] &gt;gi|75335609|sp|Q9LXA5.1|LRK91_ARATH RecName: Full=L-type lectin-domain containing receptor kinase IX.1; Short=LecRK-IX.1; Flags: Precursor &gt;gi|7671450|emb|CAB89390.1| lectin-like protein kinase-like [Arabidopsis thaliana] &gt;gi|91806848|gb|ABE66151.1| lectin protein kinase [Arabidopsis thaliana] &gt;gi|332004177|g…
			BnaC08g17670D	21187850	21189941	AT1G17970.1	RING/U-box superfamily protein; FUNCTIONS IN: zinc ion binding; EXPRESSED IN: 20 plant structures; EXPRESSED DURING: 13 growth stages; CONTAINS InterPro DOMAIN/s: Zinc finger, RING-type (InterPro:IPR001841), Zinc finger, C3HC4 RING-type (InterPro:IPR018957); BEST Arabidopsis thaliana protein match is: RING/U-box superfamily protein (TAIR:AT1G73760.1); Has 8802 Blast hits to 8789 proteins in 273 s…	gi|15220912|ref|NP_173239.1|	RING/U-box superfamily protein [Arabidopsis thaliana] &gt;gi|16226279|gb|AAL16122.1|AF428290_1 At1g17970/F2H15_16 [Arabidopsis thaliana] &gt;gi|21436039|gb|AAM51597.1| At1g17970/F2H15_16 [Arabidopsis thaliana] &gt;gi|332191536|gb|AEE29657.1| tunicamycin Induced 1 [Arabidopsis thaliana]
			BnaC08g17680D	21190331	21193712	AT1G17980.1	poly(A) polymerase 1 (PAPS1); CONTAINS InterPro DOMAIN/s: Poly(A) polymerase (InterPro:IPR014492), Poly(A) polymerase, central domain (InterPro:IPR007012), Nucleotidyltransferase, class I, C-terminal-like (InterPro:IPR011068), Nucleotidyl transferase domain (InterPro:IPR002934), Poly(A) polymerase, RNA-binding domain (InterPro:IPR007010); BEST Arabidopsis thaliana protein match is: nuclear poly(a…	gi|297850192|ref|XP_002892977.1|	nucleotidyltransferase family protein [Arabidopsis lyrata subsp. lyrata] &gt;gi|297338819|gb|EFH69236.1| nucleotidyltransferase family protein [Arabidopsis lyrata subsp. lyrata]
			BnaC08g17690D	21194771	21197305	AT1G18040.1	cyclin-dependent kinase D1;3 (CDKD1;3); CONTAINS InterPro DOMAIN/s: Protein kinase, ATP binding site (InterPro:IPR017441), Protein kinase, catalytic domain (InterPro:IPR000719), Serine/threonine-protein kinase domain (InterPro:IPR002290), Serine/threonine-protein kinase-like domain (InterPro:IPR017442), Protein kinase-like domain (InterPro:IPR011009), Serine/threonine-protein kinase, active site …	gi|297850194|ref|XP_002892978.1|	cyclin-dependent kinase D1_3 [Arabidopsis lyrata subsp. lyrata] &gt;gi|297338820|gb|EFH69237.1| cyclin-dependent kinase D1_3 [Arabidopsis lyrata subsp. lyrata]
			BnaC08g17700D	21198797	21200260	AT1G18060.1	unknown protein; INVOLVED IN: biological_process unknown; LOCATED IN: chloroplast; EXPRESSED IN: 22 plant structures; EXPRESSED DURING: 13 growth stages; Has 74 Blast hits to 74 proteins in 29 species: Archae - 0; Bacteria - 19; Metazoa - 0; Fungi - 0; Plants - 49; Viruses - 0; Other Eukaryotes - 6 (source: NCBI BLink).	gi|9719721|gb|AAF97823.1|AC034107_6	ESTs gb|AI998082, gb|AV440637, gb|AV442187, gb|AV526496 come from this gene [Arabidopsis thaliana]
			BnaC08g17710D	21200872	21204513	AT1G18070.2	Translation elongation factor EF1A/initiation factor IF2gamma family protein; FUNCTIONS IN: translation factor activity, nucleic acid binding, GTP binding, translation release factor activity, GTPase activity; INVOLVED IN: translational termination; LOCATED IN: vacuole; EXPRESSED IN: 25 plant structures; EXPRESSED DURING: 15 growth stages; CONTAINS InterPro DOMAIN/s: Translation elongation factor…	gi|15220940|ref|NP_173247.1|	translation elongation factor EF1A/initiation factor IF2gamma family protein [Arabidopsis thaliana] &gt;gi|79318119|ref|NP_001031063.1| translation elongation factor EF1A/initiation factor IF2gamma family protein [Arabidopsis thaliana] &gt;gi|21539549|gb|AAM53327.1| putative guanine nucleotide regulatory protein [Arabidopsis thaliana] &gt;gi|31711944|gb|AAP68328.1| At1g18070 [Arabidopsis thaliana…
			BnaC08g17720D	21206875	21208076	-		gi|297822045|ref|XP_002878905.1|	predicted protein [Arabidopsis lyrata subsp. lyrata] &gt;gi|297324744|gb|EFH55164.1| predicted protein [Arabidopsis lyrata subsp. lyrata]
			BnaC08g17730D	21208238	21208762	-		gi|567205692|ref|XP_006408822.1|	hypothetical protein EUTSA_v10002031mg [Eutrema salsugineum] &gt;gi|557109978|gb|ESQ50275.1| hypothetical protein EUTSA_v10002031mg [Eutrema salsugineum]
			BnaC08g17740D	21208855	21209356	-		gi|89257601|gb|ABD65090.1|	hypothetical protein 27.t00116 [Brassica oleracea]
			BnaC08g17750D	21210620	21212168	-		-	-
			BnaC08g17760D	21229317	21230954	AT1G18080.1	ATARCA; FUNCTIONS IN: nucleotide binding; INVOLVED IN: response to cadmium ion; LOCATED IN: cytosolic ribosome, chloroplast, heterotrimeric G-protein complex; EXPRESSED IN: 26 plant structures; EXPRESSED DURING: 15 growth stages; CONTAINS InterPro DOMAIN/s: WD40 repeat 2 (InterPro:IPR019782), WD40 repeat, conserved site (InterPro:IPR019775), WD40 repeat (InterPro:IPR001680), G-protein beta WD-40 …	gi|3023857|sp|Q39336.1|GBLP_BRANA	RecName: Full=Guanine nucleotide-binding protein subunit beta-like protein &gt;gi|563335|emb|CAA83924.1| guanine nucleotide regulatory protein [Brassica napus]
seq-new-rs39808	22313636		BnaC08g19270D	22212843	22215016	AT1G20480.1	AMP-dependent synthetase and ligase family protein; FUNCTIONS IN: 4-coumarate-CoA ligase activity; INVOLVED IN: phenylpropanoid metabolic process, metabolic process; LOCATED IN: cellular_component unknown; EXPRESSED IN: sperm cell; CONTAINS InterPro DOMAIN/s: AMP-binding, conserved site (InterPro:IPR020845), AMP-dependent synthetase/ligase (InterPro:IPR000873); BEST Arabidopsis thaliana protein m…	gi|15217956|ref|NP_173472.1|	AMP-dependent synthetase and ligase family protein [Arabidopsis thaliana] &gt;gi|158564049|sp|Q84P25.2|4CLL2_ARATH RecName: Full=4-coumarate--CoA ligase-like 2 &gt;gi|332191856|gb|AEE29977.1| AMP-dependent synthetase and ligase family protein [Arabidopsis thaliana]
			BnaC08g19280D	22221890	22223974	AT5G38120.1	AMP-dependent synthetase and ligase family protein; FUNCTIONS IN: 4-coumarate-CoA ligase activity; INVOLVED IN: metabolic process; EXPRESSED IN: 17 plant structures; EXPRESSED DURING: 9 growth stages; CONTAINS InterPro DOMAIN/s: AMP-binding, conserved site (InterPro:IPR020845), AMP-dependent synthetase/ligase (InterPro:IPR000873); BEST Arabidopsis thaliana protein match is: AMP-dependent syntheta…	gi|29888141|gb|AAP03015.1|	4-coumarate-CoA ligase-like protein [Arabidopsis thaliana]
			BnaC08g19290D	22236445	22238139	AT5G38120.1	AMP-dependent synthetase and ligase family protein; FUNCTIONS IN: 4-coumarate-CoA ligase activity; INVOLVED IN: metabolic process; EXPRESSED IN: 17 plant structures; EXPRESSED DURING: 9 growth stages; CONTAINS InterPro DOMAIN/s: AMP-binding, conserved site (InterPro:IPR020845), AMP-dependent synthetase/ligase (InterPro:IPR000873); BEST Arabidopsis thaliana protein match is: AMP-dependent syntheta…	gi|30693203|ref|NP_198628.2|	4-coumarate--CoA ligase-like 8 [Arabidopsis thaliana] &gt;gi|158564050|sp|Q84P26.2|4CLL8_ARATH RecName: Full=4-coumarate--CoA ligase-like 8; AltName: Full=4-coumarate--CoA ligase isoform 11; Short=At4CL11 &gt;gi|26451137|dbj|BAC42672.1| putative 4-coumarate--CoA ligase [Arabidopsis thaliana] &gt;gi|28973569|gb|AAO64109.1| putative 4-coumarate-CoA ligase [Arabidopsis thaliana] &gt;gi|36312902|gb|A…
			BnaC08g19300D	22238464	22239019	-		-	-
			BnaC08g19310D	22242243	22244495	AT1G20510.1	OPC-8:0 CoA ligase1 (OPCL1); FUNCTIONS IN: 4-coumarate-CoA ligase activity; INVOLVED IN: phenylpropanoid metabolic process, jasmonic acid biosynthetic process, response to wounding; LOCATED IN: peroxisome; EXPRESSED IN: 22 plant structures; EXPRESSED DURING: 13 growth stages; CONTAINS InterPro DOMAIN/s: AMP-binding, conserved site (InterPro:IPR020845), AMP-dependent synthetase/ligase (InterPro:IP…	gi|297850466|ref|XP_002893114.1|	opc-8:0 CoA ligase1 [Arabidopsis lyrata subsp. lyrata] &gt;gi|297338956|gb|EFH69373.1| opc-8:0 CoA ligase1 [Arabidopsis lyrata subsp. lyrata]
			BnaC08g19320D	22245932	22246628	AT1G20520.1	Arabidopsis protein of unknown function (DUF241); CONTAINS InterPro DOMAIN/s: Protein of unknown function DUF241, plant (InterPro:IPR004320); BEST Arabidopsis thaliana protein match is: Arabidopsis protein of unknown function (DUF241) (TAIR:AT1G76210.1); Has 416 Blast hits to 408 proteins in 12 species: Archae - 0; Bacteria - 0; Metazoa - 0; Fungi - 0; Plants - 416; Viruses - 0; Other Eukaryotes …	gi|116830353|gb|ABK28134.1|	unknown [Arabidopsis thaliana]
			BnaC08g19330D	22253417	22254269	AT1G20580.1	Small nuclear ribonucleoprotein family protein; FUNCTIONS IN: molecular_function unknown; LOCATED IN: nucleolus, nucleus, small nucleolar ribonucleoprotein complex; EXPRESSED IN: 22 plant structures; EXPRESSED DURING: 13 growth stages; CONTAINS InterPro DOMAIN/s: Like-Sm ribonucleoprotein (LSM) domain (InterPro:IPR001163), Like-Sm ribonucleoprotein (LSM) domain, eukaryotic/archaea-type (InterPro:…	gi|470110042|ref|XP_004291296.1|	PREDICTED: small nuclear ribonucleoprotein Sm D3-like [Fragaria vesca subsp. vesca]
			BnaC08g19340D	22254533	22256962	AT1G20610.1	Cyclin B2;3 (CYCB2;3); FUNCTIONS IN: cyclin-dependent protein kinase regulator activity; INVOLVED IN: regulation of cell cycle; LOCATED IN: nucleus; CONTAINS InterPro DOMAIN/s: Cyclin, C-terminal (InterPro:IPR004367), Cyclin-like (InterPro:IPR011028), Cyclin-related (InterPro:IPR013763), Cyclin, N-terminal (InterPro:IPR006671), Cyclin, A/B/D/E (InterPro:IPR014400), Cyclin (InterPro:IPR006670); BE…	gi|297850480|ref|XP_002893121.1|	CYCB2_3 [Arabidopsis lyrata subsp. lyrata] &gt;gi|297338963|gb|EFH69380.1| CYCB2_3 [Arabidopsis lyrata subsp. lyrata]
			BnaC08g19350D	22269973	22272210	AT5G45570.1	Ulp1 protease family protein; FUNCTIONS IN: peptidase activity, cysteine-type peptidase activity; INVOLVED IN: proteolysis; LOCATED IN: cellular_component unknown; CONTAINS InterPro DOMAIN/s: Domain of unknown function DUF1985 (InterPro:IPR015410), Peptidase C48, SUMO/Sentrin/Ubl1 (InterPro:IPR003653); BEST Arabidopsis thaliana protein match is: Ulp1 protease family protein (TAIR:AT4G08430.1); Ha…	gi|89257544|gb|ABD65034.1|	Ulp1 protease family protein [Brassica oleracea]
			BnaC08g19360D	22276046	22279625	AT1G20620.1	catalase 3 (CAT3); FUNCTIONS IN: catalase activity, cobalt ion binding; INVOLVED IN: in 7 processes; LOCATED IN: in 11 components; EXPRESSED IN: 29 plant structures; EXPRESSED DURING: 17 growth stages; CONTAINS InterPro DOMAIN/s: Catalase-like domain, haem-dependent (InterPro:IPR020835), Catalase related subgroup (InterPro:IPR018028), Catalase (InterPro:IPR002226), Catalase, N-terminal (InterPro:…	gi|5487875|gb|AAB53101.2|	catalase [Brassica napus] &gt;gi|356463802|gb|AET08935.1| catalase [Brassica napus]
			BnaC08g19370D	22293544	22296521	AT1G20640.2	Plant regulator RWP-RK family protein; CONTAINS InterPro DOMAIN/s: Octicosapeptide/Phox/Bem1p (InterPro:IPR000270), Plant regulator RWP-RK (InterPro:IPR003035); BEST Arabidopsis thaliana protein match is: Plant regulator RWP-RK family protein (TAIR:AT1G76350.1); Has 35333 Blast hits to 34131 proteins in 2444 species: Archae - 798; Bacteria - 22429; Metazoa - 974; Fungi - 991; Plants - 531; Viruse…	gi|15217991|ref|NP_173488.1|	nodule inception protein-like protein 4 [Arabidopsis thaliana] &gt;gi|42571567|ref|NP_973874.1| nodule inception protein-like protein 4 [Arabidopsis thaliana] &gt;gi|75173883|sp|Q9LE38.1|NLP4_ARATH RecName: Full=Protein NLP4; Short=AtNLP4; AltName: Full=NIN-like protein 4; AltName: Full=Nodule inception protein-like protein 4 &gt;gi|8778618|gb|AAF79626.1|AC027665_27 F5M15.4 [Arabidopsis thaliana]…
			BnaC08g19380D	22305770	22307999	AT1G20650.1	Protein kinase superfamily protein; FUNCTIONS IN: protein serine/threonine kinase activity, protein kinase activity, ATP binding; INVOLVED IN: protein amino acid phosphorylation; LOCATED IN: cellular_component unknown; EXPRESSED IN: 22 plant structures; EXPRESSED DURING: 13 growth stages; CONTAINS InterPro DOMAIN/s: Protein kinase, ATP binding site (InterPro:IPR017441), Protein kinase, catalytic …	gi|145335950|ref|NP_173489.2|	protein ALTERED SEED GERMINATION 5 [Arabidopsis thaliana] &gt;gi|8778594|gb|AAF79602.1|AC027665_3 F5M15.3 [Arabidopsis thaliana] &gt;gi|8886951|gb|AAF80637.1|AC069251_30 F2D10.13 [Arabidopsis thaliana] &gt;gi|51971194|dbj|BAD44289.1| unknown protein [Arabidopsis thaliana] &gt;gi|332191880|gb|AEE30001.1| protein ALTERED SEED GERMINATION 5 [Arabidopsis thaliana]
			BnaC08g19390D	22312918	22313203	-		-	-
			BnaC08g19400D	22314610	22318309	AT1G20670.1	DNA-binding bromodomain-containing protein; CONTAINS InterPro DOMAIN/s: Bromodomain, conserved site (InterPro:IPR018359), Bromodomain (InterPro:IPR001487); BEST Arabidopsis thaliana protein match is: DNA-binding bromodomain-containing protein (TAIR:AT1G76380.2); Has 11096 Blast hits to 8233 proteins in 323 species: Archae - 0; Bacteria - 121; Metazoa - 4363; Fungi - 1457; Plants - 677; Viruses - …	gi|297850490|ref|XP_002893126.1|	DNA-binding bromodomain-containing protein [Arabidopsis lyrata subsp. lyrata] &gt;gi|297338968|gb|EFH69385.1| DNA-binding bromodomain-containing protein [Arabidopsis lyrata subsp. lyrata]
			BnaC08g19410D	22325017	22326885	AT3G56480.1	myosin heavy chain-related; FUNCTIONS IN: molecular_function unknown; INVOLVED IN: biological_process unknown; LOCATED IN: plasma membrane; EXPRESSED IN: 22 plant structures; EXPRESSED DURING: 13 growth stages; BEST Arabidopsis thaliana protein match is: unknown protein (TAIR:AT2G40820.1); Has 486 Blast hits to 458 proteins in 133 species: Archae - 0; Bacteria - 70; Metazoa - 142; Fungi - 25; Pla…	gi|566174257|ref|XP_002308873.2|	proline-rich family protein [Populus trichocarpa] &gt;gi|550335367|gb|EEE92396.2| proline-rich family protein [Populus trichocarpa]
			BnaC08g19420D	22327037	22328479	AT4G02480.1	AAA-type ATPase family protein; FUNCTIONS IN: nucleoside-triphosphatase activity, ATPase activity, nucleotide binding, ATP binding; LOCATED IN: chloroplast; EXPRESSED IN: 24 plant structures; EXPRESSED DURING: 14 growth stages; CONTAINS InterPro DOMAIN/s: ATPase, AAA+ type, core (InterPro:IPR003593), ATPase, AAA-type, core (InterPro:IPR003959), SMAD/FHA domain (InterPro:IPR008984), ATPase, AAA-ty…	gi|3193293|gb|AAC19277.1|	T14P8.8 [Arabidopsis thaliana] &gt;gi|7269008|emb|CAB80741.1| AT4g02480 [Arabidopsis thaliana]
			BnaC08g19430D	22330086	22331730	AT1G20696.2	high mobility group B3 (HMGB3); FUNCTIONS IN: chromatin binding, structural constituent of chromatin, DNA binding, sequence-specific DNA binding transcription factor activity; INVOLVED IN: chromatin assembly or disassembly; LOCATED IN: chromatin; EXPRESSED IN: 24 plant structures; EXPRESSED DURING: 13 growth stages; CONTAINS InterPro DOMAIN/s: High mobility group, superfamily (InterPro:IPR009071)…	gi|357640485|gb|AET87126.1|	high mobility group B2 protein [Brassica napus]
			BnaC08g19440D	22332186	22337007	AT1G20760.1	Calcium-binding EF hand family protein; FUNCTIONS IN: calcium ion binding; LOCATED IN: plasma membrane; EXPRESSED IN: 24 plant structures; EXPRESSED DURING: 15 growth stages; CONTAINS InterPro DOMAIN/s: EF-HAND 2 (InterPro:IPR018249), EPS15 homology (EH) (InterPro:IPR000261), EF-hand-like domain (InterPro:IPR011992), Calcium-binding EF-hand (InterPro:IPR002048); BEST Arabidopsis thaliana protein …	gi|297845052|ref|XP_002890407.1|	calcium-binding EF hand family protein [Arabidopsis lyrata subsp. lyrata] &gt;gi|297336249|gb|EFH66666.1| calcium-binding EF hand family protein [Arabidopsis lyrata subsp. lyrata]
			BnaC08g19450D	22337208	22338541	AT1G20770.1	unknown protein; Has 59 Blast hits to 59 proteins in 24 species: Archae - 0; Bacteria - 0; Metazoa - 26; Fungi - 4; Plants - 29; Viruses - 0; Other Eukaryotes - 0 (source: NCBI BLink).	gi|15218031|ref|NP_173500.1|	uncharacterized protein [Arabidopsis thaliana] &gt;gi|8886946|gb|AAF80632.1|AC069251_25 F2D10.26 [Arabidopsis thaliana] &gt;gi|38454150|gb|AAR20769.1| At1g20770 [Arabidopsis thaliana] &gt;gi|41349930|gb|AAS00350.1| At1g20770 [Arabidopsis thaliana] &gt;gi|332191899|gb|AEE30020.1| uncharacterized protein AT1G20770 [Arabidopsis thaliana]
			BnaC08g19460D	22338807	22343086	AT1G20780.1	senescence-associated E3 ubiquitin ligase 1 (SAUL1); FUNCTIONS IN: ubiquitin-protein ligase activity; INVOLVED IN: regulation of chlorophyll catabolic process, regulation of chlorophyll biosynthetic process, leaf senescence, regulation of abscisic acid biosynthetic process; LOCATED IN: plasma membrane; EXPRESSED IN: 9 plant structures; EXPRESSED DURING: 7 growth stages; CONTAINS InterPro DOMAIN/s…	gi|42562204|ref|NP_564125.2|	senescence-associated E3 ubiquitin ligase 1 [Arabidopsis thaliana] &gt;gi|75264018|sp|Q9LM76.1|PUB44_ARATH RecName: Full=U-box domain-containing protein 44; AltName: Full=Plant U-box protein 44; AltName: Full=Protein SENESCENCE-ASSOCIATED E3 UBIQUITIN LIGASE 1 &gt;gi|8886935|gb|AAF80621.1|AC069251_14 F2D10.27 [Arabidopsis thaliana] &gt;gi|332191900|gb|AEE30021.1| senescence-associated E3 ubiquiti…
			BnaC08g19470D	22344469	22345609	AT1G20790.1	F-box family protein; CONTAINS InterPro DOMAIN/s: F-box domain, cyclin-like (InterPro:IPR001810), F-box domain, Skp2-like (InterPro:IPR022364), F-box associated interaction domain (InterPro:IPR017451); BEST Arabidopsis thaliana protein match is: F-box family protein (TAIR:AT1G20795.1); Has 1819 Blast hits to 716 proteins in 166 species: Archae - 2; Bacteria - 445; Metazoa - 392; Fungi - 63; Plant…	gi|30687017|ref|NP_173502.2|	putative F-box/kelch-repeat protein [Arabidopsis thaliana] &gt;gi|75264017|sp|Q9LM75.1|FBK6_ARATH RecName: Full=Putative F-box/kelch-repeat protein At1g20790 &gt;gi|8886945|gb|AAF80631.1|AC069251_24 F2D10.28 [Arabidopsis thaliana] &gt;gi|332191901|gb|AEE30022.1| putative F-box/kelch-repeat protein [Arabidopsis thaliana]
			BnaC08g19480D	22377827	22378421	AT1G20823.1	RING/U-box superfamily protein; FUNCTIONS IN: zinc ion binding; INVOLVED IN: response to chitin; EXPRESSED IN: 22 plant structures; EXPRESSED DURING: 13 growth stages; CONTAINS InterPro DOMAIN/s: Zinc finger, RING-type (InterPro:IPR001841), Zinc finger, C3HC4 RING-type (InterPro:IPR018957); BEST Arabidopsis thaliana protein match is: RING/U-box superfamily protein (TAIR:AT1G76410.1); Has 9063 Bla…	gi|117667934|gb|ABK56013.1|	zinc finger protein [Brassica rapa]
			BnaC08g19490D	22383588	22384526	AT1G20830.1	MULTIPLE CHLOROPLAST DIVISION SITE 1 (MCD1); FUNCTIONS IN: molecular_function unknown; INVOLVED IN: chloroplast fission; LOCATED IN: chloroplast inner membrane, chloroplast envelope; EXPRESSED IN: 22 plant structures; EXPRESSED DURING: 13 growth stages; Has 38 Blast hits to 38 proteins in 12 species: Archae - 0; Bacteria - 0; Metazoa - 0; Fungi - 0; Plants - 38; Viruses - 0; Other Eukaryotes - 0 …	gi|8886939|gb|AAF80625.1|AC069251_18	F2D10.35 [Arabidopsis thaliana]
			BnaC08g19500D	22384868	22387921	AT1G20840.1	tonoplast monosaccharide transporter1 (TMT1); FUNCTIONS IN: carbohydrate transmembrane transporter activity, sugar:hydrogen symporter activity, nucleoside transmembrane transporter activity; INVOLVED IN: in 6 processes; LOCATED IN: plant-type vacuole membrane, plasma membrane, vacuole, membrane; EXPRESSED IN: 30 plant structures; EXPRESSED DURING: 15 growth stages; CONTAINS InterPro DOMAIN/s: Sug…	gi|312281717|dbj|BAJ33724.1|	unnamed protein product [Thellungiella halophila]			-78520
			BnaC08g19510D	22392156	22393548	AT1G20850.1	xylem cysteine peptidase 2 (XCP2); FUNCTIONS IN: cysteine-type peptidase activity, peptidase activity; INVOLVED IN: proteolysis, developmental programmed cell death; LOCATED IN: cell wall; EXPRESSED IN: 23 plant structures; EXPRESSED DURING: 13 growth stages; CONTAINS InterPro DOMAIN/s: Peptidase C1A, papain (InterPro:IPR013128), Proteinase inhibitor I29, cathepsin propeptide (InterPro:IPR013201)…	gi|18394919|ref|NP_564126.1|	xylem cysteine proteinase 2 [Arabidopsis thaliana] &gt;gi|71153409|sp|Q9LM66.2|XCP2_ARATH RecName: Full=Xylem cysteine proteinase 2; Short=AtXCP2; Flags: Precursor &gt;gi|4836904|gb|AAD30607.1|AC007369_17 Putative cysteine proteinase [Arabidopsis thaliana] &gt;gi|6708183|gb|AAF25832.1|AF191028_1 papain-type cysteine endopeptidase XCP2 [Arabidopsis thaliana] &gt;gi|28466959|gb|AAO44088.1| At1g2085…
			BnaC08g19520D	22393762	22396949	AT1G20860.1	phosphate transporter 1;8 (PHT1;8); FUNCTIONS IN: phosphate transmembrane transporter activity, carbohydrate transmembrane transporter activity, sugar:hydrogen symporter activity; INVOLVED IN: transport, transmembrane transport; LOCATED IN: integral to membrane, membrane; CONTAINS InterPro DOMAIN/s: Sugar transporter, conserved site (InterPro:IPR005829), Major facilitator superfamily (InterPro:IP…	gi|297850506|ref|XP_002893134.1|	phosphate transporter family protein [Arabidopsis lyrata subsp. lyrata] &gt;gi|297338976|gb|EFH69393.1| phosphate transporter family protein [Arabidopsis lyrata subsp. lyrata]
			BnaC08g19530D	22397559	22399316	AT1G76460.1	RNA-binding (RRM/RBD/RNP motifs) family protein; FUNCTIONS IN: RNA binding, nucleotide binding, nucleic acid binding; INVOLVED IN: biological_process unknown; LOCATED IN: cellular_component unknown; EXPRESSED IN: 23 plant structures; EXPRESSED DURING: 13 growth stages; CONTAINS InterPro DOMAIN/s: RNA recognition motif, RNP-1 (InterPro:IPR000504), Nucleotide-binding, alpha-beta plait (InterPro:IPR…	gi|297850510|ref|XP_002893136.1|	RNA recognition motif-containing protein [Arabidopsis lyrata subsp. lyrata] &gt;gi|297338978|gb|EFH69395.1| RNA recognition motif-containing protein [Arabidopsis lyrata subsp. lyrata]
			BnaC08g19540D	22404616	22405593	AT4G30950.1	fatty acid desaturase 6 (FAD6); FUNCTIONS IN: omega-6 fatty acid desaturase activity; INVOLVED IN: photoinhibition, fatty acid biosynthetic process; LOCATED IN: chloroplast, chloroplast envelope; EXPRESSED IN: 22 plant structures; EXPRESSED DURING: 13 growth stages; CONTAINS InterPro DOMAIN/s: Fatty acid desaturase, type 1 (InterPro:IPR005804); BEST Arabidopsis thaliana protein match is: fatty ac…	gi|297798870|ref|XP_002867319.1|	omega-6 fatty acid desaturase [Arabidopsis lyrata subsp. lyrata] &gt;gi|297313155|gb|EFH43578.1| omega-6 fatty acid desaturase [Arabidopsis lyrata subsp. lyrata]
			BnaC08g19550D	22405978	22406408	-		gi|841208|gb|AAB68964.1|	trypsin inhibitor propeptide [Brassica oleracea]
			BnaC08g19560D	22411174	22412169	-		-	-
			BnaC08g19570D	22412231	22412405	AT1G73260.1	kunitz trypsin inhibitor 1 (KTI1); FUNCTIONS IN: endopeptidase inhibitor activity; INVOLVED IN: response to salt stress, response to hydrogen peroxide, defense response to bacterium, programmed cell death, response to salicylic acid stimulus; LOCATED IN: mitochondrion; EXPRESSED IN: 8 plant structures; EXPRESSED DURING: LP.06 six leaves visible, LP.04 four leaves visible, 4 anthesis, petal differ…	-	-
			BnaC08g19580D	22435951	22436902	AT1G20900.1	ESCAROLA (ESC); CONTAINS InterPro DOMAIN/s: Protein of unknown function DUF296 (InterPro:IPR005175), Predicted AT-hook DNA-binding (InterPro:IPR014476); BEST Arabidopsis thaliana protein match is: Predicted AT-hook DNA-binding family protein (TAIR:AT1G76500.1); Has 2335 Blast hits to 2120 proteins in 205 species: Archae - 0; Bacteria - 577; Metazoa - 531; Fungi - 95; Plants - 869; Viruses - 15; O…	gi|15223074|ref|NP_177776.1|	AT-hook motif nuclear localized protein 29 [Arabidopsis thaliana] &gt;gi|12323978|gb|AAG51949.1|AC015450_10 unknown protein; 41834-42742 [Arabidopsis thaliana] &gt;gi|119657402|tpd|FAA00300.1| TPA: AT-hook motif nuclear localized protein 29 [Arabidopsis thaliana] &gt;gi|332197729|gb|AEE35850.1| AT-hook motif nuclear localized protein 29 [Arabidopsis thaliana]
seq-new-rs36496	21582357	chrC09	BnaC09g23820D	21448442	21451537	AT4G11740.1	SAY1; INVOLVED IN: vesicle-mediated transport; LOCATED IN: cytosol, nucleus; EXPRESSED IN: 25 plant structures; EXPRESSED DURING: 14 growth stages; CONTAINS InterPro DOMAIN/s: UBX (InterPro:IPR001012), Ubiquitin interacting motif (InterPro:IPR003903), UBA-like (InterPro:IPR009060); BEST Arabidopsis thaliana protein match is: Ubiquitin-like superfamily protein (TAIR:AT4G23040.1); Has 5504 Blast hi…	gi|42566487|ref|NP_567380.2|	protein SAY1 [Arabidopsis thaliana] &gt;gi|332657643|gb|AEE83043.1| protein SAY1 [Arabidopsis thaliana]
			BnaC09g23830D	21555848	21557881	AT4G11610.1	C2 calcium/lipid-binding plant phosphoribosyltransferase family protein; CONTAINS InterPro DOMAIN/s: C2 membrane targeting protein (InterPro:IPR018029), C2 calcium/lipid-binding domain, CaLB (InterPro:IPR008973), Phosphoribosyltransferase C-terminal (InterPro:IPR013583), C2 calcium-dependent membrane targeting (InterPro:IPR000008); BEST Arabidopsis thaliana protein match is: Calcium-dependent lip…	gi|42566473|ref|NP_192898.2|	C2 calcium/lipid-binding plant phosphoribosyltransferase family protein [Arabidopsis thaliana] &gt;gi|28973638|gb|AAO64141.1| unknown protein [Arabidopsis thaliana] &gt;gi|30793935|gb|AAP40420.1| unknown protein [Arabidopsis thaliana] &gt;gi|110737276|dbj|BAF00585.1| phosphoribosylanthranilate transferase like protein [Arabidopsis thaliana] &gt;gi|332657630|gb|AEE83030.1| C2 calcium/lipid-binding…
			BnaC09g23840D	21564639	21566456	AT5G55470.1	Na+/H+ (sodium hydrogen) exchanger 3 (NHX3); CONTAINS InterPro DOMAIN/s: Na+/H+ exchanger, subfamily (InterPro:IPR004709), Cation/H+ exchanger, conserved region (InterPro:IPR018422), Cation/H+ exchanger (InterPro:IPR006153), Na+/H+ exchanger, isoforms 1-4, conserved region (InterPro:IPR018407); BEST Arabidopsis thaliana protein match is: sodium hydrogen exchanger 2 (TAIR:AT3G05030.1); Has 1807 Bl…	gi|15240519|ref|NP_200358.1|	sodium/hydrogen exchanger 4 [Arabidopsis thaliana] &gt;gi|84029369|sp|Q8S397.2|NHX4_ARATH RecName: Full=Sodium/hydrogen exchanger 4; AltName: Full=Na(+)/H(+) exchanger 4; Short=NHE-4 &gt;gi|9758179|dbj|BAB08564.1| sodium proton exchanger [Arabidopsis thaliana] &gt;gi|62320490|dbj|BAD95025.1| sodium proton exchanger [Arabidopsis thaliana] &gt;gi|332009249|gb|AED96632.1| sodium/hydrogen exchanger 4…
			BnaC09g23850D	21568977	21570553	AT4G11570.2	Haloacid dehalogenase-like hydrolase (HAD) superfamily protein; FUNCTIONS IN: hydrolase activity, catalytic activity; INVOLVED IN: metabolic process; LOCATED IN: cellular_component unknown; EXPRESSED IN: 24 plant structures; EXPRESSED DURING: 15 growth stages; CONTAINS InterPro DOMAIN/s: Haloacid dehalogenase-like hydrolase (InterPro:IPR005834); BEST Arabidopsis thaliana protein match is: Haloaci…	gi|15234236|ref|NP_192894.1|	haloacid dehalogenase-like hydrolase domain-containing protein [Arabidopsis thaliana] &gt;gi|30681816|ref|NP_849359.1| haloacid dehalogenase-like hydrolase domain-containing protein [Arabidopsis thaliana] &gt;gi|7267857|emb|CAB78200.1| putative protein [Arabidopsis thaliana] &gt;gi|7321054|emb|CAB82162.1| putative protein [Arabidopsis thaliana] &gt;gi|16648789|gb|AAL25585.1| AT4g11570/F25E4_190 […
			BnaC09g23860D	21583154	21584347	AT4G11560.1	bromo-adjacent homology (BAH) domain-containing protein; FUNCTIONS IN: DNA binding; INVOLVED IN: transcription; LOCATED IN: cellular_component unknown; EXPRESSED IN: 26 plant structures; EXPRESSED DURING: 15 growth stages; CONTAINS InterPro DOMAIN/s: Bromo adjacent homology (BAH) domain (InterPro:IPR001025), Transcription elongation factor S-II, central domain (InterPro:IPR003618); BEST Arabidops…	gi|22328569|ref|NP_192893.2|	bromo-adjacent homology (BAH) domain-containing protein [Arabidopsis thaliana] &gt;gi|19347810|gb|AAL86355.1| unknown protein [Arabidopsis thaliana] &gt;gi|22136724|gb|AAM91681.1| unknown protein [Arabidopsis thaliana] &gt;gi|332657624|gb|AEE83024.1| bromo-adjacent homology (BAH) domain-containing protein [Arabidopsis thaliana]
			BnaC09g23870D	21586428	21586587	AT2G20690.1	lumazine-binding family protein; FUNCTIONS IN: binding, riboflavin synthase activity; INVOLVED IN: riboflavin biosynthetic process; LOCATED IN: chloroplast; EXPRESSED IN: 22 plant structures; EXPRESSED DURING: 13 growth stages; CONTAINS InterPro DOMAIN/s: Riboflavin synthase-like beta-barrel (InterPro:IPR017938), Lumazine-binding protein (InterPro:IPR001783); Has 6777 Blast hits to 6682 proteins …	gi|51243463|gb|AAT99438.1|	riboflavin synthase [synthetic construct]
			BnaC09g23880D	21626394	21630864	AT4G11480.1	cysteine-rich RLK (RECEPTOR-like protein kinase) 32 (CRK32); FUNCTIONS IN: kinase activity; INVOLVED IN: protein amino acid phosphorylation; LOCATED IN: endomembrane system; CONTAINS InterPro DOMAIN/s: Protein kinase, ATP binding site (InterPro:IPR017441), Protein kinase, catalytic domain (InterPro:IPR000719), Protein of unknown function DUF26 (InterPro:IPR002902), Serine-threonine/tyrosine-prote…	gi|297809417|ref|XP_002872592.1|	predicted protein [Arabidopsis lyrata subsp. lyrata] &gt;gi|297318429|gb|EFH48851.1| predicted protein [Arabidopsis lyrata subsp. lyrata]
			BnaC09g23890D	21634685	21635505	-		-	-
			BnaC09g23900D	21647247	21654348	-		-	-
			BnaC09g23910D	21659700	21664150	AT4G11420.1	eukaryotic translation initiation factor 3A (EIF3A); FUNCTIONS IN: translation initiation factor activity; INVOLVED IN: translational initiation; LOCATED IN: eukaryotic translation initiation factor 3 complex, plasma membrane; EXPRESSED IN: 26 plant structures; EXPRESSED DURING: 14 growth stages; CONTAINS InterPro DOMAIN/s: Proteasome component (PCI) domain (InterPro:IPR000717); BEST Arabidopsis …	gi|590644432|ref|XP_007031080.1|	Eukaryotic translation initiation factor 3 subunit A [Theobroma cacao] &gt;gi|508719685|gb|EOY11582.1| Eukaryotic translation initiation factor 3 subunit A [Theobroma cacao]
			BnaC09g23920D	21664645	21666716	AT4G11410.1	NAD(P)-binding Rossmann-fold superfamily protein; FUNCTIONS IN: oxidoreductase activity, binding, catalytic activity; INVOLVED IN: oxidation reduction, metabolic process; EXPRESSED IN: 22 plant structures; EXPRESSED DURING: 13 growth stages; CONTAINS InterPro DOMAIN/s: NAD(P)-binding domain (InterPro:IPR016040), Glucose/ribitol dehydrogenase (InterPro:IPR002347), Short-chain dehydrogenase/reducta…	gi|297813613|ref|XP_002874690.1|	short-chain dehydrogenase/reductase family protein [Arabidopsis lyrata subsp. lyrata] &gt;gi|297320527|gb|EFH50949.1| short-chain dehydrogenase/reductase family protein [Arabidopsis lyrata subsp. lyrata]
			BnaC09g23930D	21670560	21671029	-		-	-
			BnaC09g23940D	21671128	21671586	AT1G35660.1	unknown protein; FUNCTIONS IN: molecular_function unknown; INVOLVED IN: biological_process unknown; LOCATED IN: plasma membrane; EXPRESSED IN: 19 plant structures; EXPRESSED DURING: 11 growth stages; Has 309 Blast hits to 256 proteins in 99 species: Archae - 0; Bacteria - 11; Metazoa - 192; Fungi - 12; Plants - 36; Viruses - 0; Other Eukaryotes - 58 (source: NCBI BLink).	-	-
			BnaC09g23950D	21672376	21672725	-		-	-
			BnaC09g23960D	21672795	21675317	AT4G11530.1	cysteine-rich RLK (RECEPTOR-like protein kinase) 34 (CRK34); FUNCTIONS IN: kinase activity; INVOLVED IN: protein amino acid phosphorylation; LOCATED IN: endomembrane system; EXPRESSED IN: 10 plant structures; EXPRESSED DURING: 8 growth stages; CONTAINS InterPro DOMAIN/s: Protein kinase, ATP binding site (InterPro:IPR017441), Serine/threonine-protein kinase domain (InterPro:IPR002290), Protein of …	gi|240255784|ref|NP_192890.4|	putative cysteine-rich receptor-like protein kinase 35 [Arabidopsis thaliana] &gt;gi|332278211|sp|Q9LDQ3.3|CRK35_ARATH RecName: Full=Putative cysteine-rich receptor-like protein kinase 35; Short=Cysteine-rich RLK35; Flags: Precursor &gt;gi|332657621|gb|AEE83021.1| cysteine-rich RECEPTOR-like protein kinase 34 [Arabidopsis thaliana]
			BnaC09g23970D	21734274	21734478	AT3G06090.1	unknown protein; FUNCTIONS IN: molecular_function unknown; INVOLVED IN: biological_process unknown; LOCATED IN: endomembrane system; EXPRESSED IN: flower, leaf, seed; EXPRESSED DURING: petal differentiation and expansion stage, LP.08 eight leaves visible, E expanded cotyledon stage; Has 7 Blast hits to 7 proteins in 2 species: Archae - 0; Bacteria - 0; Metazoa - 0; Fungi - 0; Plants - 7; Viruses …	gi|116830505|gb|ABK28210.1|	unknown [Arabidopsis thaliana]
Bn-scaff_17799_1-p2987946	39625508		BnaC09g36200D	39525162	39526326	AT5G22875.2	unknown protein; FUNCTIONS IN: molecular_function unknown; INVOLVED IN: biological_process unknown; LOCATED IN: endomembrane system; EXPRESSED IN: 24 plant structures; EXPRESSED DURING: 15 growth stages; Has 32 Blast hits to 32 proteins in 16 species: Archae - 0; Bacteria - 0; Metazoa - 0; Fungi - 0; Plants - 30; Viruses - 0; Other Eukaryotes - 2 (source: NCBI BLink).	gi|18420614|ref|NP_568425.1|	uncharacterized protein [Arabidopsis thaliana] &gt;gi|79328391|ref|NP_001031924.1| uncharacterized protein [Arabidopsis thaliana] &gt;gi|21592531|gb|AAM64480.1| unknown [Arabidopsis thaliana] &gt;gi|106879143|gb|ABF82601.1| At5g22875 [Arabidopsis thaliana] &gt;gi|332005708|gb|AED93091.1| uncharacterized protein AT5G22875 [Arabidopsis thaliana] &gt;gi|332005709|gb|AED93092.1| uncharacterized prote…
			BnaC09g36210D	39528210	39531421	AT5G22850.1	Eukaryotic aspartyl protease family protein; FUNCTIONS IN: aspartic-type endopeptidase activity; INVOLVED IN: proteolysis; LOCATED IN: endomembrane system; EXPRESSED IN: 23 plant structures; EXPRESSED DURING: 13 growth stages; CONTAINS InterPro DOMAIN/s: Peptidase aspartic (InterPro:IPR021109), Peptidase aspartic, catalytic (InterPro:IPR009007), Peptidase A1 (InterPro:IPR001461); BEST Arabidopsis…	gi|297812425|ref|XP_002874096.1|	aspartyl protease family protein [Arabidopsis lyrata subsp. lyrata] &gt;gi|297319933|gb|EFH50355.1| aspartyl protease family protein [Arabidopsis lyrata subsp. lyrata]
			BnaC09g36220D	39531823	39534271	AT5G22840.1	Protein kinase superfamily protein; FUNCTIONS IN: protein serine/threonine kinase activity, protein kinase activity, kinase activity, ATP binding; INVOLVED IN: protein amino acid phosphorylation; LOCATED IN: cellular_component unknown; EXPRESSED IN: 21 plant structures; EXPRESSED DURING: 13 growth stages; CONTAINS InterPro DOMAIN/s: Protein kinase, ATP binding site (InterPro:IPR017441), Protein k…	gi|297812423|ref|XP_002874095.1|	kinase family protein [Arabidopsis lyrata subsp. lyrata] &gt;gi|297319932|gb|EFH50354.1| kinase family protein [Arabidopsis lyrata subsp. lyrata]
			BnaC09g36230D	39534441	39538000	AT5G22830.1	magnesium (Mg) transporter 10 (MGT10); FUNCTIONS IN: magnesium ion transmembrane transporter activity; INVOLVED IN: magnesium ion transport; LOCATED IN: chloroplast, membrane, chloroplast envelope; EXPRESSED IN: 25 plant structures; EXPRESSED DURING: 13 growth stages; CONTAINS InterPro DOMAIN/s: Mg2+ transporter protein, CorA-like (InterPro:IPR002523); BEST Arabidopsis thaliana protein match is: …	gi|18420608|ref|NP_568424.1|	magnesium transporter 10 [Arabidopsis thaliana] &gt;gi|122163919|sp|Q058N4.1|MRS2B_ARATH RecName: Full=Magnesium transporter MRS2-11, chloroplastic; AltName: Full=Magnesium Transporter 10; Short=AtMGT10; Flags: Precursor &gt;gi|115646791|gb|ABJ17119.1| At5g22830 [Arabidopsis thaliana] &gt;gi|332005702|gb|AED93085.1| magnesium transporter 10 [Arabidopsis thaliana]
			BnaC09g36240D	39557009	39558856	AT5G22791.2	F-box family protein; FUNCTIONS IN: molecular_function unknown; INVOLVED IN: biological_process unknown; LOCATED IN: cellular_component unknown; CONTAINS InterPro DOMAIN/s: F-box domain, cyclin-like (InterPro:IPR001810), F-box domain, Skp2-like (InterPro:IPR022364), F-box associated domain, type 3 (InterPro:IPR013187), F-box associated interaction domain (InterPro:IPR017451); BEST Arabidopsis tha…	gi|238481346|ref|NP_001154731.1|	F-box family protein [Arabidopsis thaliana] &gt;gi|332005695|gb|AED93078.1| F-box family protein [Arabidopsis thaliana]
			BnaC09g36250D	39558981	39559548	AT5G48620.1	Disease resistance protein (CC-NBS-LRR class) family; FUNCTIONS IN: ATP binding; INVOLVED IN: defense response, apoptosis; LOCATED IN: plasma membrane; EXPRESSED IN: cultured cell; CONTAINS InterPro DOMAIN/s: NB-ARC (InterPro:IPR002182), Disease resistance protein (InterPro:IPR000767); BEST Arabidopsis thaliana protein match is: Disease resistance protein (CC-NBS-LRR class) family (TAIR:AT5G43470…	gi|297808267|ref|XP_002872017.1|	predicted protein [Arabidopsis lyrata subsp. lyrata] &gt;gi|297317854|gb|EFH48276.1| predicted protein [Arabidopsis lyrata subsp. lyrata]
			BnaC09g36260D	39559609	39562073	AT1G53350.1	Disease resistance protein (CC-NBS-LRR class) family; FUNCTIONS IN: ATP binding; INVOLVED IN: apoptosis, defense response; EXPRESSED IN: 19 plant structures; EXPRESSED DURING: 9 growth stages; CONTAINS InterPro DOMAIN/s: NB-ARC (InterPro:IPR002182), Disease resistance protein (InterPro:IPR000767); BEST Arabidopsis thaliana protein match is: Disease resistance protein (CC-NBS-LRR class) family (TA…	gi|297808267|ref|XP_002872017.1|	predicted protein [Arabidopsis lyrata subsp. lyrata] &gt;gi|297317854|gb|EFH48276.1| predicted protein [Arabidopsis lyrata subsp. lyrata]
			BnaC09g36270D	39563446	39565535	AT5G22790.1	reticulata-related 1 (RER1); FUNCTIONS IN: molecular_function unknown; INVOLVED IN: biological_process unknown; LOCATED IN: mitochondrion, plastid, chloroplast inner membrane, chloroplast envelope; EXPRESSED IN: 15 plant structures; EXPRESSED DURING: 6 growth stages; CONTAINS InterPro DOMAIN/s: Protein of unknown function DUF3411 (InterPro:IPR021825); BEST Arabidopsis thaliana protein match is: P…	gi|15242979|ref|NP_197671.1|	protein reticulata-related 1 [Arabidopsis thaliana] &gt;gi|13605899|gb|AAK32935.1|AF367348_1 AT5g22790/K8E10_2 [Arabidopsis thaliana] &gt;gi|9758754|dbj|BAB09278.1| unnamed protein product [Arabidopsis thaliana] &gt;gi|19548025|gb|AAL87376.1| AT5g22790/K8E10_2 [Arabidopsis thaliana] &gt;gi|332005693|gb|AED93076.1| protein reticulata-related 1 [Arabidopsis thaliana]
			BnaC09g36280D	39565711	39566185	AT3G11405.1	unknown protein; BEST Arabidopsis thaliana protein match is: unknown protein (TAIR:AT3G55570.1); Has 35333 Blast hits to 34131 proteins in 2444 species: Archae - 798; Bacteria - 22429; Metazoa - 974; Fungi - 991; Plants - 531; Viruses - 0; Other Eukaryotes - 9610 (source: NCBI BLink).	gi|502097076|ref|XP_004490905.1|	PREDICTED: uncharacterized protein LOC101503685 [Cicer arietinum]
			BnaC09g36290D	39567491	39569907	AT1G52950.1	Nucleic acid-binding, OB-fold-like protein; CONTAINS InterPro DOMAIN/s: Nucleic acid-binding, OB-fold-like (InterPro:IPR016027), Nucleic acid-binding, OB-fold (InterPro:IPR012340), Protein of unknown function DUF223 (InterPro:IPR003871), Replication factor A, C-terminal (InterPro:IPR013955); BEST Arabidopsis thaliana protein match is: Nucleic acid-binding, OB-fold-like protein (TAIR:AT2G05642.1);…	gi|15219131|ref|NP_175703.1|	nucleic acid-binding, OB-fold-like protein [Arabidopsis thaliana] &gt;gi|12324642|gb|AAG52278.1|AC019018_15 putative replication protein; 94555-97079 [Arabidopsis thaliana] &gt;gi|332194750|gb|AEE32871.1| nucleic acid-binding, OB-fold-like protein [Arabidopsis thaliana]
			BnaC09g36300D	39570784	39573385	-		gi|9294530|dbj|BAB02793.1|	helicase-like protein [Arabidopsis thaliana]
			BnaC09g36310D	39579848	39580766	AT3G26010.1	Galactose oxidase/kelch repeat superfamily protein; CONTAINS InterPro DOMAIN/s: F-box domain, cyclin-like (InterPro:IPR001810), F-box domain, Skp2-like (InterPro:IPR022364), Galactose oxidase/kelch, beta-propeller (InterPro:IPR011043); BEST Arabidopsis thaliana protein match is: F-box family protein (TAIR:AT4G22430.1); Has 530 Blast hits to 526 proteins in 32 species: Archae - 0; Bacteria - 0; Me…	gi|15230960|ref|NP_189230.1|	Galactose oxidase/kelch repeat superfamily protein [Arabidopsis thaliana] &gt;gi|75274193|sp|Q9LU90.1|FB188_ARATH RecName: Full=F-box protein At3g26010 &gt;gi|9279606|dbj|BAB01064.1| unnamed protein product [Arabidopsis thaliana] &gt;gi|91806483|gb|ABE65969.1| F-box family protein [Arabidopsis thaliana] &gt;gi|332643580|gb|AEE77101.1| Galactose oxidase/kelch repeat superfamily protein [Arabidopsi…
			BnaC09g36320D	39595321	39604242	AT5G22780.1	Adaptor protein complex AP-2, alpha subunit; FUNCTIONS IN: protein transporter activity, binding; INVOLVED IN: intracellular protein transport, vesicle-mediated transport, protein transport; LOCATED IN: plasma membrane; EXPRESSED IN: cultured cell; CONTAINS InterPro DOMAIN/s: Clathrin adaptor, alpha/beta/gamma-adaptin, appendage, Ig-like subdomain (InterPro:IPR008152), Adaptor protein complex AP-…	gi|15242964|ref|NP_197670.1|	AP-2 complex subunit alpha-2 [Arabidopsis thaliana] &gt;gi|75157386|sp|Q8LPK4.1|AP2A2_ARATH RecName: Full=AP-2 complex subunit alpha-2; AltName: Full=Adapter-related protein complex 2 subunit alpha-2; AltName: Full=Adaptor protein complex AP-2 subunit alpha-2; AltName: Full=Alpha-adaptin 2; AltName: Full=Clathrin assembly protein complex 2 alpha-C large chain; Short=At-aC-Ad; Short=At-alphaC-Ad &…
			BnaC09g36330D	39607501	39608192	AT1G29850.2	double-stranded DNA-binding family protein; FUNCTIONS IN: double-stranded DNA binding, DNA binding; INVOLVED IN: biological_process unknown; LOCATED IN: cellular_component unknown; EXPRESSED IN: 24 plant structures; EXPRESSED DURING: 15 growth stages; CONTAINS InterPro DOMAIN/s: DNA-binding TFAR19-related protein (InterPro:IPR002836); Has 693 Blast hits to 693 proteins in 323 species: Archae - 25…	gi|30690937|ref|NP_849728.1|	double-stranded DNA-binding protein [Arabidopsis thaliana] &gt;gi|332193020|gb|AEE31141.1| double-stranded DNA-binding-like protein [Arabidopsis thaliana]
			BnaC09g36340D	39635556	39640789	AT5G22740.1	cellulose synthase-like A02 (CSLA02); CONTAINS InterPro DOMAIN/s: Glycosyl transferase, family 2 (InterPro:IPR001173); BEST Arabidopsis thaliana protein match is: Nucleotide-diphospho-sugar transferases superfamily protein (TAIR:AT5G03760.1); Has 5133 Blast hits to 5129 proteins in 1484 species: Archae - 200; Bacteria - 4017; Metazoa - 35; Fungi - 91; Plants - 482; Viruses - 11; Other Eukaryotes …	gi|15242959|ref|NP_197666.1|	glucomannan 4-beta-mannosyltransferase 2 [Arabidopsis thaliana] &gt;gi|75171864|sp|Q9FNI7.1|CSLA2_ARATH RecName: Full=Glucomannan 4-beta-mannosyltransferase 2; AltName: Full=Cellulose synthase-like protein A2; Short=AtCslA2; AltName: Full=Glucomannan synthase; AltName: Full=Mannan synthase 2 &gt;gi|10178248|dbj|BAB11680.1| glucosyltransferase-like protein [Arabidopsis thaliana] &gt;gi|16648764|gb…
			BnaC09g36350D	39642314	39644160	AT5G22650.2	histone deacetylase 2B (HD2B); FUNCTIONS IN: histone deacetylase activity; INVOLVED IN: DNA mediated transformation, negative regulation of transcription, polarity specification of adaxial/abaxial axis; LOCATED IN: cytosol, nucleolus, cell wall, plasma membrane; EXPRESSED IN: 25 plant structures; EXPRESSED DURING: 13 growth stages; BEST Arabidopsis thaliana protein match is: histone deacetylase 3…	gi|297808263|ref|XP_002872015.1|	predicted protein [Arabidopsis lyrata subsp. lyrata] &gt;gi|297317852|gb|EFH48274.1| predicted protein [Arabidopsis lyrata subsp. lyrata]
			BnaC09g36360D	39644712	39648865	AT5G22640.1	embryo defective 1211 (emb1211); FUNCTIONS IN: molecular_function unknown; INVOLVED IN: chloroplast organization, embryo development, embryo development ending in seed dormancy; LOCATED IN: chloroplast thylakoid membrane, chloroplast, chloroplast envelope; EXPRESSED IN: 26 plant structures; EXPRESSED DURING: 13 growth stages; CONTAINS InterPro DOMAIN/s: MORN motif (InterPro:IPR003409); Has 30201 …	gi|297808261|ref|XP_002872014.1|	EMB1211 [Arabidopsis lyrata subsp. lyrata] &gt;gi|297317851|gb|EFH48273.1| EMB1211 [Arabidopsis lyrata subsp. lyrata]
			BnaC09g36370D	39658749	39660284	AT5G22630.1	arogenate dehydratase 5 (ADT5); FUNCTIONS IN: arogenate dehydratase activity, prephenate dehydratase activity; INVOLVED IN: L-phenylalanine biosynthetic process; LOCATED IN: chloroplast; EXPRESSED IN: 22 plant structures; EXPRESSED DURING: 13 growth stages; CONTAINS InterPro DOMAIN/s: Prephenate dehydratase (InterPro:IPR001086), Prephenate dehydratase, conserved site (InterPro:IPR018528); BEST Ar…	gi|15242928|ref|NP_197655.1|	arogenate dehydratase 5 [Arabidopsis thaliana] &gt;gi|75171870|sp|Q9FNJ8.1|AROD5_ARATH RecName: Full=Arogenate dehydratase 5, chloroplastic; Short=AtADT5; Flags: Precursor &gt;gi|10178237|dbj|BAB11669.1| chorismate mutase/prephenate dehydratase-like protein [Arabidopsis thaliana] &gt;gi|16604398|gb|AAL24205.1| AT5g22630/MDJ22_5 [Arabidopsis thaliana] &gt;gi|19699063|gb|AAL90899.1| AT5g22630/MDJ22…
			BnaC09g36380D	39660345	39660634	-		-	-
			BnaC09g36390D	39679029	39679736	AT5G22580.1	Stress responsive A/B Barrel Domain; FUNCTIONS IN: molecular_function unknown; INVOLVED IN: biological_process unknown; LOCATED IN: chloroplast; EXPRESSED IN: 22 plant structures; EXPRESSED DURING: 13 growth stages; CONTAINS InterPro DOMAIN/s: Stress responsive alpha-beta barrel (InterPro:IPR013097), Dimeric alpha-beta barrel (InterPro:IPR011008); BEST Arabidopsis thaliana protein match is: heat …	gi|449456098|ref|XP_004145787.1|	PREDICTED: uncharacterized protein At5g22580-like isoform 1 [Cucumis sativus] &gt;gi|449456100|ref|XP_004145788.1| PREDICTED: uncharacterized protein At5g22580-like isoform 2 [Cucumis sativus] &gt;gi|449456102|ref|XP_004145789.1| PREDICTED: uncharacterized protein At5g22580-like isoform 3 [Cucumis sativus] &gt;gi|449496254|ref|XP_004160085.1| PREDICTED: uncharacterized protein At5g22580-like isof…
			BnaC09g36400D	39726177	39727580	AT5G22570.1	WRKY DNA-binding protein 38 (WRKY38); CONTAINS InterPro DOMAIN/s: DNA-binding WRKY (InterPro:IPR003657); BEST Arabidopsis thaliana protein match is: WRKY DNA-binding protein 62 (TAIR:AT5G01900.1); Has 3118 Blast hits to 2692 proteins in 112 species: Archae - 0; Bacteria - 0; Metazoa - 0; Fungi - 0; Plants - 3102; Viruses - 0; Other Eukaryotes - 16 (source: NCBI BLink).	gi|297812389|ref|XP_002874078.1|	WRKY DNA-binding protein 38 [Arabidopsis lyrata subsp. lyrata] &gt;gi|297319915|gb|EFH50337.1| WRKY DNA-binding protein 38 [Arabidopsis lyrata subsp. lyrata]

## Sheet: Table S4
Table S4: Comparison of common LGs and traits detected for root related traits between our GWAS results and previous linkage mapping QTLs
Trait-GWAS	Environment	QTLs	Chr.	Position (bp)	Trait-Linkage Mapping	Environment		QTLs	Chr.	Reference
TRV	WH17	qTRV-A02-1	A02	8480672	TRV	HK (E1)	HK (E2)	sqA02-1	A02	Dun et al. (2019)
	WH20	qTRV-A02-3	A02	1395709
TRV	BLUE	qTRV-C03-5	C03	10605083	RV	LP		qLP-RV-C3	C03	Yang et al. (2010)
	WH17	qTRV-C03-1	C03	59713737
TSA	WH17	qTSA-C03-1	C03	59713737	RSA	LP		qLP-RSA-C3	C03
	WH20	qTSA-C03-3	C03	16702113
TRL	WH17	qTRL-C04-1	C04	39436313	TRL	E2		sqTRL.C04	C04	Wang et al. (2019)
	WH20	qTRL-C04-2	C04	378326
PRL	WH17	qPRL-C06-2	C06	35706988	PRL	E2	E3	sqPRL.C06	C06
	WH20	qPRL-C06-3	C06	7120761		LP	HP	PRL_LP_C06, PRL_HP_C06		Shi et al. (2013)
PRL	WH19	qPRL-C08-1	C08	22313636	PRL	E1	E2 & E3	sqPRL.C08	C08	Wang et al. (2019)
	WH20	qPRL-C08-3	C08	8714379		HK (E2)	LN (E1)			Wang et al. (2017)
PRL

## Sheet: Table S5
Table S5: Phenotypic variations of the examined 12 traits in Brassica napus over the course of three years
Genotype	Trait	Year 2017	Year 2019	Year 2020	Average of three years	SD
S1	PRL	22.981	19.86	27.778	23.5397	3.98845
S2		26.158	21.347	27.076	24.8603	3.07706
S3		23.321	20.34	26.598	23.4197	3.13017
S4		20.65	22.627	27.456	23.5777	3.50118
S5		21.745	21.347	26.061	23.051	2.61432
S6		19.38	20.173	22.883	20.812	1.83684
S7		22.5	22.593	26.911	24.0013	2.52027
S8		18.59	19.107	25.41	21.0357	3.79709
S9		21.385	18.793	24.534	21.5707	2.875
S10		20.616	NA	26.128	23.372	3.89757
S11		17.28	17.547	23.808	19.545	3.69428
S12		25.855	23.073	28.479	25.8023	2.70338
S13		13.55	16.227	22.473	17.4167	4.57891
S14		18.33	19.64	22.947	20.3057	2.37939
S15		20.645	19.887	22.356	20.9627	1.26478
S16		22.515	20.893	20.218	21.2087	1.18059
S17		19.705	NA	25.233	22.469	3.90889
S18		19.764	18.247	23.994	20.6683	2.97832
S19		17.101	20.149	21.681	19.6437	2.33144
S20		14.267	17.553	23.699	18.5063	4.78772
S21		20.06	22.773	26.317	23.05	3.13768
S22		20.859	24.007	26.817	23.8943	2.9806
S23		20.11	21.153	23.967	21.7433	1.99511
S24		18.035	21.758	27.95	22.581	5.00847
S25		18.14	24.45	26.333	22.9743	4.29121
S26		19.305	23.247	24.211	22.2543	2.59928
S27		19.77	23.528	28.522	23.94	4.39052
S28		17.605	20.724	29.639	22.656	6.2453
S29		19.51	21.76	24.561	21.9437	2.5305
S30		15.547	16.93	23.511	18.6627	4.25534
S31		23.165	22.24	27.956	24.4537	3.06817
S32		23.875	21.007	27.273	24.0517	3.13673
S33		23.169	21.58	30.275	25.008	4.63003
S34		19.465	24.493	29.678	24.5453	5.1067
S35		20.98	25.713	28.478	25.057	3.7918
S36		17.86	23.933	26.333	22.7087	4.36717
S37		20.19	23.993	28.117	24.1	3.96458
S38		14.433	21.287	22.878	19.5327	4.48751
S39		20.195	NA	26.728	23.4615	4.61953
S40		17.045	22.76	24.773	21.526	4.00906
S41		18.25	NA	28.523	23.3865	7.26411
S42		15.635	21.62	25.404	20.8863	4.92565
S43		20.935	22.273	28.728	23.9787	4.1671
S44		20.83	23.647	29.222	24.5663	4.27087
S45		20.79	22.615	25.828	23.0777	2.55067
S46		18.49	23.753	27.461	23.2347	4.50791
S47		19.84	26.7	32.339	26.293	6.25943
S48		20.035	22.833	25.45	22.7727	2.708
S49		18.27	20.427	24.701	21.1327	3.27306
S50		18.265	20.627	28.633	22.5083	5.43401
S51		18.02	NA	26.617	22.3185	6.079
S52		16.269	18	25.828	20.0323	5.09327
S53		21.495	23.203	31.122	25.2733	5.13658
S54		21.1	NA	27.728	24.414	4.6867
S55		20.04	21.66	28.7	23.4667	4.60401
S56		17.39	20.6	24.933	20.9743	3.78541
S57		17.89	18.847	27.516	21.4177	5.30294
S58		16.23	21.82	26.603	21.551	5.19173
S59		14.62	20.592	26.972	20.728	6.17712
S60		19.896	23.76	28.872	24.176	4.50244
S61		22.565	20.727	26.083	23.125	2.72156
S62		23.085	25.42	31.497	26.6673	4.3425
S63		19.25	17.018	27.66	21.3093	5.61192
S64		20.335	22.74	26.199	23.0913	2.94774
S66		16.885	20.42	25.622	20.9757	4.39493
S67		17.075	NA	24.899	20.987	5.5324
S68		18.36	NA	23.489	20.9245	3.62675
S69		15.14	NA	24.56	19.85	6.66095
S70		18.39	20.227	26.85	21.8223	4.44991
S71		18.375	20.027	24.05	20.8173	2.91888
S72		18.095	19.653	28.296	22.0147	5.49529
S73		19.08	22.513	30.867	24.1533	6.06229
S74		20.23	19.18	23.708	21.0393	2.37001
S75		15.94	22.54	28.661	22.3803	6.362
S76		18.61	19.147	24.136	20.631	3.04727
S77		16.04	17.613	24.883	19.512	4.71745
S78		18.705	19.193	25.128	21.0087	3.57578
S79		21.94	21.513	30.539	24.664	5.09238
S80		17.359	16.903	27.211	20.491	5.82416
S81		18.745	23.107	30.672	24.1747	6.03475
S82		20.445	25.447	27.144	24.3453	3.48273
S83		20.395	23.067	29.75	24.404	4.81868
S84		19.585	19.547	25.811	21.6477	3.6056
S85		21.335	22.18	25.8	23.105	2.37187
S86		12.47	16.98	21.79	17.08	4.6608
S87		20.91	19.183	24.6	21.5643	2.76714
S88		17.48	22.048	24.456	21.328	3.5433
S89		17.095	18.46	21.822	19.1257	2.43279
S90		13.075	20.527	23.912	19.1713	5.54423
S91		17.69	20.46	21.606	19.9187	2.01334
S92		18.415	21.86	24.75	21.675	3.17155
S93		NA	23.807	25.2	24.5035	0.985
S94		16.33	19.567	22.922	19.6063	3.29618
S95		18.895	23.22	NA	21.0575	3.05824
S96		19.01	23.727	28.588	23.775	4.78918
S97		17.3	21.813	27.094	22.069	4.90202
S98		21.18	21.32	30.306	24.2687	5.22895
S99		19.115	21.487	26.128	22.2433	3.56715
S101		20.801	26.92	28.122	25.281	3.92607
S102		16.914	20.087	28.783	21.928	6.14494
S103		20.385	22.6	28.122	23.7023	3.98455
S104		18.595	18.713	22.677	19.995	2.32343
S105		19.3	23.567	27	23.289	3.85752
S106		19.945	23.495	27.817	23.7523	3.9423
S108		18.775	21.847	27.777	22.7997	4.57599
S109		14.38	19.213	26.222	19.9383	5.95423
S110		17.185	19.553	25.017	20.585	4.01669
S111		16.675	20.96	28.828	22.1543	6.1639
S112		19.895	23.633	29.4	24.3093	4.78846
S113		16.55	22.173	29.09	22.6043	6.28112
S114		14.055	21.227	25.666	20.316	5.85886
S115		18.715	22.405	26.288	22.4693	3.78691
S116		20.375	22.64	26.628	23.2143	3.16582
S117		19.946	24.273	29.236	24.485	4.64863
S118		15.065	20.527	24.471	20.021	4.72337
S119		14.955	18.9	25.504	19.7863	5.33006
S121		19.108	22.387	25.939	22.478	3.41641
S122		14.685	17.107	24.556	18.7827	5.14442
S124		14.311	19.747	27.429	20.4957	6.59097
S125		18.451	20.118	30.406	22.9917	6.47487
S126		15.805	19.585	25.651	20.347	4.96703
S127		17.9	21.913	25.694	21.8357	3.89758
S128		15.285	19.187	23.2	19.224	3.95763
S129		20.13	22.487	27.661	23.426	3.85231
S130		14.005	18.803	24.767	19.1917	5.39152
S131		19.46	20.92	29.892	23.424	5.64882
S132		20.485	19.895	28.456	22.9453	4.78149
S133		16.14	18.867	27.403	20.8033	5.87587
S134		19.555	20.293	26.922	22.2567	4.05711
S135		19.41	19.893	29.972	23.0917	5.96344
S136		16.31	20.307	26.661	21.0927	5.22003
S137		18.084	21.6	30.394	23.3593	6.34078
S138		17.333	19.253	27.244	21.2767	5.25627
S139		11.98	20.98	23.967	18.9757	6.2398
S140		16.11	18.517	25.422	20.0163	4.83367
S141		14.83	21.855	27	21.2283	6.10915
S142		17.58	20.057	29.211	22.2827	6.1266
S143		17.205	20.093	26.822	21.3733	4.93468
S144		18.98	18.227	25.344	20.8503	3.9098
S145		17.55	20.205	25.017	20.924	3.78507
S146		18.2	19.32	24.85	20.79	3.56038
S147		19.624	18.82	26.239	21.561	4.07116
S148		12.388	16.92	22.609	17.3057	5.1214
S149		15.685	19.16	26.613	20.486	5.58337
S150		14.49	18.547	21.467	18.168	3.50391
S151		18.666	18.167	26.597	21.1433	4.7296
S152		16.625	19.527	27.15	21.1007	5.4361
S153		18.175	20.533	27.45	22.0527	4.82063
S154		17.93	23.602	28.372	23.3013	5.22749
S155		18.085	20.293	26.325	21.5677	4.26532
S157		17.665	20.487	30.689	22.947	6.85163
S158		18.18	21.027	24.606	21.271	3.21994
S159		15.48	19.86	22.7	19.3467	3.63727
S160		20.707	NA	26.567	23.637	4.14365
S161		19.28	22.32	29.411	23.6703	5.19873
S164		15.48	20.533	23.643	19.8853	4.11986
S165		17.735	21.018	27.178	21.977	4.79399
S166		21.256	20.607	27.728	23.197	3.93736
S167		19.64	21.5	24.9	22.0133	2.66731
S168		19.44	21.647	25.956	22.3477	3.31403
S169		21.215	20.7	25.233	22.3827	2.48186
S170		19.155	18.55	24.972	20.8923	3.54602
S171		22.085	20.693	24.533	22.437	1.94405
S172		21.788	22.073	26.08	23.3137	2.39995
S173		22.643	23.2	24.333	23.392	0.861204
S174		20.588	21.14	24.994	22.2407	2.40038
S175		25.1	23.02	26.611	24.9103	1.803
S176		24.091	22.573	22.129	22.931	1.02883
S177		21	20.98	26.831	22.937	3.37232
S178		22.013	21.753	20.014	21.26	1.08687
S179		25.558	19.58	25.871	23.6697	3.54521
S180		22.48	19.393	23.444	21.7723	2.11619
S181		26.679	23.227	24.255	24.7203	1.77242
S182		25.365	21.58	26.778	24.5743	2.68769
S183		21.094	19.829	25.061	21.9947	2.72981
S184		23.775	22.412	26.967	24.3847	2.3379
S185		23.362	21.673	28.193	24.4093	3.38383
S186		20.634	NA	29.5	25.067	6.26921
S187		23.135	19.673	23.881	22.2297	2.24534
S188		23.865	21.293	23.23	22.796	1.3398
S189		24.435	17.203	21.586	21.0747	3.64301
S190		24.825	18.78	28.533	24.046	4.92294
S191		22.095	22.267	20.667	21.6763	0.878329
S192		24.42	24.327	26.333	25.0267	1.13227
S193		17.476	17.451	23.085	19.3373	3.2456
S194		19.32	20.473	24.95	21.581	2.97405
S195		20.936	23.447	28.525	24.3027	3.86618
S196		24.745	20.96	25.772	23.8257	2.53431
S197		20.32	19.18	21.499	20.333	1.15955
S198		25.52	22.64	25.044	24.4013	1.54382
S199		26.248	24.587	27.317	26.0507	1.37566
S200		18.82	18.2	26.981	21.3337	4.90055
S201		22.817	20.627	23.461	22.3017	1.48562
S202		20.496	20.372	23.362	21.41	1.69162
S203		23.73	22.272	27.189	24.397	2.52545
S204		20.254	19.848	21.772	20.6247	1.01414
S205		23.84	17.553	25.714	22.369	4.27474
S206		NA	NA	24.827	24.827	NA
S207		29.038	22.213	29.117	26.7893	3.96342
S208		13.996	16.253	18.906	16.385	2.45766
S209		22.93	26.133	27.849	25.6373	2.49668
S210		18.295	19.1	24.672	20.689	3.47278
S211		24.948	21.793	28.539	25.0933	3.37535
S212		18.45	21.653	26.22	22.1077	3.9049
S213		23.92	25.645	29.786	26.4503	3.01478
S214		21.928	19.253	25.572	22.251	3.17186
S215		20.846	20.58	24.847	22.091	2.39047
S216		24.014	16.54	24.749	21.7677	4.54218
S217		20.605	19.783	30.616	23.668	6.03116
S218		20.581	20.232	25.175	21.996	2.75862
S219		23.55	26.207	27.767	25.8413	2.13215
S220		18.225	22.393	24.627	21.7483	3.24932
S221		17.52	18.247	23.664	19.8103	3.35711
S222		15.9	23.23	30.05	23.06	7.07653
S223		21.048	22.3	26.333	23.227	2.76176
S224		21.905	23.147	27.856	24.3027	3.13931
S225		20.606	21.067	28.708	23.4603	4.55045
S226		20.305	24.007	27.834	24.0487	3.76467
S227		21	23.067	27.717	23.928	3.44028
S228		15.91	23.6	27.039	22.183	5.69821
S229		17.68	20.493	27.744	21.9723	5.19253
S232		15.31	21.367	25.167	20.6147	4.97138
S233		22.105	21.773	29.583	24.487	4.41639
S234		20.26	20.807	29.343	23.47	5.09352
S235		20.884	26.422	30.594	25.9667	4.87099
S236		19.965	24.98	30.112	25.019	5.07361
S238		30.04	NA	30.739	30.3895	0.494268
S239		NA	NA	25.983	25.983	NA
S240		21.6	23.48	27.558	24.2127	3.04582
S241		20.7	17.367	23.506	20.5243	3.07327
S242		21.965	NA	29.656	25.8105	5.43836
S243		22.105	20.387	29.166	23.886	4.6526
S244		19.495	20.08	25.784	21.7863	3.47442
S245		23.875	20.713	26.422	23.67	2.86002
S246		21.585	20.793	27.122	23.1667	3.44823
S247		21.825	21.673	25.761	23.0863	2.31758
S248		23.44	22.02	27.533	24.331	2.86246
S249		21.415	NA	27.177	24.296	4.07435
S250		23.895	NA	29.248	26.5715	3.78514
S251		21.81	19.527	28.04	23.1257	4.40636
S252		21.575	NA	29.167	25.371	5.36835
S253		20.905	19.967	27.85	22.9073	4.30609
S254		21.95	17.94	26.294	22.0613	4.17811
S255		24.08	23.547	30.328	25.985	3.77058
S256		21.59	NA	25.1	23.345	2.48194
S257		18.625	NA	27.011	22.818	5.9298
S258		18.22	NA	24.787	21.5035	4.64357
S259		24.16	20.68	27.286	24.042	3.30458
S260		19.65	18.047	28.033	21.91	5.3629
S261		23.305	22.26	26.283	23.9493	2.08746
S262		21.5	20.162	29.528	23.73	5.06559
S264		25.66	NA	31.283	28.4715	3.97606
S265		20.745	18.693	25.028	21.4887	3.23231
S266		27.175	22.893	30.441	26.8363	3.78538
S267		25.215	21.43	28.843	25.1627	3.70678
S268		24.665	22.407	30.353	25.8083	4.09453
S269		25.745	24.653	32.294	27.564	4.13253
S270		22.545	21.864	28.106	24.1717	3.4242
S271		23.04	23.053	26.833	24.3087	2.18615
S272		24.42	23.287	26.981	24.896	1.89244
S273		26.29	NA	26.372	26.331	0.0579828
S274		28.12	28.18	29.116	28.472	0.558527
S275		24.33	20.387	27.514	24.077	3.57023
S276		26.325	25.507	26.475	26.1023	0.521
S277		22.3	21.3	23.793	22.4643	1.2546
S278		19.815	21.8	25.706	22.4403	2.99725
S279		18.12	21.39	31.742	23.7507	7.11121
S280		24.355	NA	28.389	26.372	2.85247
S281		21.305	22.247	28.156	23.9027	3.71349
S282		21.935	26.867	25.028	24.61	2.49243
S283		25.535	23.793	27.617	25.6483	1.91452
S284		16.438	17.588	25.442	19.8227	4.90034
S285		21.57	18.91	21.456	20.6453	1.50392
S286		24.938	24.58	29.333	26.2837	2.64686
S287		23.335	23.253	25.039	23.8757	1.00831
S288		19.454	NA	26.55	23.002	5.01763
S290		21.25	21.927	27.789	23.6553	3.59583
S291		19.845	21.707	26.178	22.5767	3.25484
S293		20.805	22.093	27.289	23.3957	3.43268
S294		25.845	28.187	31.375	28.469	2.77576
S295		25.67	23.587	29.894	26.3837	3.2135
S296		20.72	21.967	25.883	22.8567	2.69403
S297		22.3	21.28	29.547	24.3757	4.50745
S298		17.63	22.847	25.756	22.0777	4.11727
S300		23.193	21.062	25.932	23.3957	2.44132
S301		23.033	22.193	26.444	23.89	2.25135
S302		18.645	20.415	26.989	22.0163	4.39645
S304		19.325	20.587	23.5	21.1373	2.14122
S305		23.945	20.593	25.42	23.3193	2.47358
S306		22.445	18.858	28.817	23.3733	5.04398
S307		20.735	20.867	27.283	22.9617	3.74297
S309		21.345	22.002	26.044	23.1303	2.5446
S310		25.235	22.072	26.133	24.48	2.13318
S311		23.645	22.973	27.753	24.7903	2.58765
S312		23.355	23.873	28.761	25.3297	2.98289
S313		24.545	23.92	29.206	25.8903	2.88841
S314		21.78	20.52	28.586	23.6287	4.33915
S315		19.335	21.71	24.378	21.8077	2.52292
S316		24.73	22.013	28.22	24.9877	3.11151
S317		22.17	20.923	26.252	23.115	2.78735
S318		18.638	19.102	28.894	22.2113	5.79201
S319		24.55	21.02	26.972	24.1807	2.99314
S320		21.215	18.662	30.572	23.483	6.27056
S321		21.37	20.18	26.217	22.589	3.19778
S322		21.44	16.96	27.262	21.8873	5.16555
S323		22.48	21.74	25.739	23.3197	2.12762
S324		20.75	18.84	22.989	20.8597	2.07667
S325		21.281	20.88	29.483	23.8813	4.85533
S326		20.38	18.36	25.339	21.3597	3.59116
S327		20.688	21.827	21.256	21.257	0.569501
S328		15.82	18.513	23.372	19.235	3.82742
S329		21.245	22.833	27.978	24.0187	3.51961
S330		21.795	20.14	26.578	22.8377	3.34325
S331		25.19	19.733	27.394	24.1057	3.94393
S332		23.26	NA	26.667	24.9635	2.40911
S333		20.92	NA	26.967	23.9435	4.27587
S334		17.375	20.333	28.431	22.0463	5.72367
S335		21.61	20.733	28.733	23.692	4.3876
R268		17.475	17.213	NA	17.344	0.185262
S336		23.07	22.02	28.662	24.584	3.57046
S339		18.311	20.767	26.589	21.889	4.25153
S340		17.33	17.993	24.402	19.9083	3.90572
S342		21.953	23.42	26.65	24.0077	2.40301
S343		21.66	20.88	27.233	23.2577	3.46476
S345		21.186	22.827	27.732	23.915	3.40593
S346		18.95	16.78	21.4	19.0433	2.31141
S347		22	23.313	30.031	25.1147	4.30799
S348		24.545	23.847	26.388	24.9267	1.31279
S349		17.589	19.753	21.586	19.6427	2.00078
S367		17.16	17.033	24.949	19.714	4.53409
S350		18.575	21.86	24.494	21.643	2.96546
S361		NA	NA	27.037	27.037	NA
R269		NA	NA	NA	NA	NA
S365		NA	NA	17.308	17.308	NA
S366		NA	NA	20.839	20.839	NA
S369		20.24	NA	21.194	20.717	0.67458
S352		25.648	NA	27.172	26.41	1.07763
S368		21.133	22.124	28.576	23.9443	4.04163
S1	DMR	18.836	15.586	11.896	15.4393	3.47232
S2		17.138	12.327	10.637	13.3673	3.37305
S3		14.345	11.959	12.017	12.7737	1.36112
S4		17.923	14.68	14.552	15.7183	1.91037
S5		17.763	14.967	12.052	14.9273	2.85571
S6		13.96	12.765	10.571	12.432	1.71887
S7		24.832	14.567	13.921	17.7733	6.12151
S8		20.378	15.715	15.326	17.1397	2.81122
S9		15.33	13.438	11.893	13.5537	1.72142
S10		18.633	NA	13.854	16.2435	3.37926
S11		16.236	15.335	17.168	16.2463	0.916544
S12		18.97	14.741	13.179	15.63	2.99611
S13		12.83	13.217	11.223	12.4233	1.05738
S14		17.365	13.125	13.24	14.5767	2.41545
S15		14.242	15.201	13.464	14.3023	0.87007
S16		16.874	15.162	11.535	14.5237	2.72614
S17		17.581	NA	12.122	14.8515	3.8601
S18		12.986	14.786	13.248	13.6733	0.972461
S19		16.82	12.028	9.663	12.837	3.64644
S20		12.7	12.351	10.997	12.016	0.899567
S21		13.198	15.496	12.761	13.8183	1.46924
S22		15.3	13.054	14.719	14.3577	1.16578
S23		16.849	11.726	12.884	13.8197	2.68661
S24		15.748	12.134	11.079	12.987	2.44859
S25		14.638	14.907	12.76	14.1017	1.16968
S26		13.72	12.407	12.726	12.951	0.684807
S27		16.561	13.722	12.247	14.1767	2.19264
S28		17.698	13.085	12.113	14.2987	2.98376
S29		15.736	11.153	12.103	12.9973	2.41885
S30		15.52	14.995	11.492	14.0023	2.1898
S31		16.873	15.354	14.508	15.5783	1.19835
S32		17.431	13.437	12.925	14.5977	2.46706
S33		16.08	12.769	11.831	13.56	2.23221
S34		17.683	13.751	14.464	15.2993	2.09487
S35		18.159	14.285	13.861	15.435	2.36856
S36		16.213	11.147	12.704	13.3547	2.59492
S37		18.779	13.193	14.851	15.6077	2.86884
S38		16.953	12.507	14.561	14.6737	2.22514
S39		16.782	NA	13.458	15.12	2.35042
S40		13.967	14.199	13.403	13.8563	0.409377
S41		14.428	NA	12.272	13.35	1.52452
S42		15.666	12.676	12.94	13.7607	1.65534
S43		16.661	13.77	13.073	14.5013	1.90252
S44		14.718	12.236	12.598	13.184	1.34076
S45		15.647	11.922	12.101	13.2233	2.10086
S46		13.597	12.598	12.179	12.7913	0.728501
S47		14.476	12.449	13.013	13.3127	1.0462
S48		14.45	11.996	12.209	12.885	1.35951
S49		13.126	12.151	13.412	12.8963	0.661128
S50		15.229	12.668	11.544	13.147	1.88862
S51		12.332	NA	10.494	11.413	1.29966
S52		18.343	14.549	14.082	15.658	2.33697
S53		14.629	12.935	14.683	14.0823	0.993987
S54		19.283	NA	11.207	15.245	5.71059
S55		16.168	13.827	13.403	14.466	1.48914
S56		17.185	14.937	13.308	15.1433	1.94672
S57		15.3	12.025	12.865	13.3967	1.701
S58		20.564	16.417	18.596	18.5257	2.07439
S59		16.279	14.727	13.471	14.8257	1.4066
S60		20.807	15.881	14.575	17.0877	3.28656
S61		12.604	12.503	11.277	12.128	0.738716
S62		16.305	11.503	11.657	13.155	2.72907
S63		18.22	18.423	17.62	18.0877	0.417536
S64		14.813	14.086	12.639	13.846	1.10669
S66		14.235	13.209	12.157	13.2003	1.03903
S67		18.773	NA	13.773	16.273	3.53553
S68		13.422	NA	11.668	12.545	1.24027
S69		18.048	NA	15.235	16.6415	1.98909
S70		13.579	12.779	10.963	12.4403	1.34048
S71		17.336	12.248	12.043	13.8757	2.99849
S72		14.186	13.004	10.331	12.507	1.97497
S73		14.911	13.829	12.786	13.842	1.06256
S74		16.32	12.692	10.276	13.096	3.04219
S75		16.246	15.961	14.222	15.4763	1.09559
S76		15.702	13.645	14.393	14.58	1.04117
S77		14.327	12.989	11.491	12.9357	1.41875
S78		15.96	14.013	14.922	14.965	0.974212
S79		16.562	15.229	14.517	15.436	1.0381
S80		15.266	13.098	13.964	14.1093	1.09128
S81		18.122	14.815	15.067	16.0013	1.84087
S82		16.289	11.444	12.933	13.5553	2.48173
S83		14.226	13.074	11.282	12.8607	1.48355
S84		23.835	12.007	13.546	16.4627	6.43083
S85		14.505	13.856	12.345	13.5687	1.1083
S86		13.391	10.968	11.882	12.0803	1.22362
S87		17.885	12.855	12.501	14.4137	3.01147
S88		16.83	14.632	12.048	14.5033	2.3936
S89		16.817	12.163	14.083	14.3543	2.33883
S90		15.199	12.136	11.959	13.098	1.82167
S91		15.849	13.074	15.542	14.8217	1.52129
S92		14.036	12.858	12.846	13.2467	0.683609
S93		NA	12.133	9.503	10.818	1.85969
S94		16.777	14.321	12.026	14.3747	2.37595
S95		15.057	13.313	NA	14.185	1.23319
S96		17.267	15.566	13.279	15.3707	2.00116
S97		14.945	13.395	15.252	14.5307	0.995423
S98		16.195	12.255	13.526	13.992	2.01091
S99		15.422	13.591	14.807	14.6067	0.931794
S101		16.436	11.912	12.727	13.6917	2.41134
S102		16.082	15.383	15.018	15.4943	0.540667
S103		15.854	14.555	13.018	14.4757	1.41966
S104		17.793	14.351	15.087	15.7437	1.81253
S105		16.268	12.233	11.976	13.4923	2.40723
S106		15.911	14.572	13.188	14.557	1.36156
S108		15.649	13.536	11.796	13.6603	1.92951
S109		15.169	15.406	12.907	14.494	1.37948
S110		15.413	13.628	14.756	14.599	0.902797
S111		15.163	13.4	11.86	13.4743	1.65275
S112		15.316	15.195	12.821	14.444	1.40686
S113		15.756	14.998	13.551	14.7683	1.1203
S114		16.937	15.347	15.394	15.8927	0.904724
S115		22.44	16.091	13.69	17.407	4.52101
S116		17.723	14.581	13.466	15.2567	2.20747
S117		23.518	14.016	15.156	17.5633	5.1883
S118		17.576	16.667	15.095	16.446	1.25518
S119		18.346	11.673	13.548	14.5223	3.44154
S121		18.864	12.477	9.938	13.7597	4.59916
S122		14.86	14.523	14.04	14.4743	0.412161
S124		16.75	12.291	12.948	13.9963	2.40726
S125		13.797	11.458	11.57	12.275	1.31928
S126		16.804	14.548	13.013	14.7883	1.90689
S127		16.611	14.841	13.51	14.9873	1.55567
S128		14.032	12.167	11.238	12.479	1.42289
S129		17.919	13.927	13.145	14.997	2.56056
S130		17.489	17.718	14.109	16.4387	2.0208
S131		16.728	15.636	15.108	15.824	0.826201
S132		15.462	15.738	12.736	14.6453	1.65928
S133		15.789	13.873	14.576	14.746	0.969247
S134		14.673	13.557	12.364	13.5313	1.15471
S135		16.584	12.648	12.751	13.9943	2.24331
S136		16.059	14.115	13.808	14.6607	1.22068
S137		17.325	13.787	13.295	14.8023	2.1985
S138		16.497	13.087	14.294	14.626	1.72907
S139		18.37	14.35	15.087	15.9357	2.14016
S140		13.082	11.984	11.492	12.186	0.81402
S141		14.727	13.659	13.929	14.105	0.555327
S142		16.17	12.073	11.866	13.3697	2.42737
S143		16.151	13.379	13.197	14.2423	1.65546
S144		14.374	12.419	14.051	13.6147	1.048
S145		16.622	11.589	10.571	12.9273	3.23991
S146		17.246	13.212	11.729	14.0623	2.8551
S147		20.125	14.07	16.543	16.9127	3.04438
S148		20.928	13.168	13.061	15.719	4.51144
S149		15.092	12.419	10.954	12.8217	2.09818
S150		23.452	19.063	13.975	18.83	4.74279
S151		16.002	12.081	11.117	13.0667	2.58737
S152		19.438	14.323	11.887	15.216	3.85389
S153		15.527	13.395	12.891	13.9377	1.39928
S154		15.151	13.059	11.727	13.3123	1.726
S155		15.164	15.13	14.823	15.039	0.187832
S157		19.878	15.423	13.393	16.2313	3.31721
S158		17.396	17.055	15.053	16.5013	1.26583
S159		14.168	13.837	12.652	13.5523	0.797082
S160		16.792	NA	15.134	15.963	1.17238
S161		15.761	14.265	11.998	14.008	1.89462
S164		20.214	17.205	15.876	17.765	2.22256
S165		14.323	14.488	13.269	14.0267	0.661325
S166		16.173	12.675	12.241	13.6963	2.15581
S167		17.25	13.985	12.778	14.671	2.31358
S168		15.406	16.193	14.727	15.442	0.733663
S169		14.393	12.011	11.148	12.5173	1.68071
S170		18.475	15.711	13.796	15.994	2.3523
S171		20.334	19.511	16.014	18.6197	2.29379
S172		18.652	15.301	14.151	16.0347	2.33847
S173		15.754	13.74	11.672	13.722	2.04106
S174		15.849	15.751	13.702	15.1007	1.21227
S175		16.774	14.083	12.626	14.4943	2.10437
S176		18.609	17.092	13.06	16.2537	2.86792
S177		19.011	14.657	16.066	16.578	2.2217
S178		21.222	16.079	9.651	15.6507	5.79738
S179		18.921	14.854	18.599	17.458	2.26087
S180		15.182	15.271	12.926	14.4597	1.32894
S181		15.903	14.419	11.704	14.0087	2.12936
S182		15.141	14.933	15.477	15.1837	0.274498
S183		13.173	13.747	13.935	13.6183	0.39696
S184		16.931	15.696	16.159	16.262	0.623909
S185		12.558	13.374	12.636	12.856	0.450293
S186		15.527	NA	15.351	15.439	0.124451
S187		15.383	15.467	14.402	15.084	0.592121
S188		13.865	14.266	12.662	13.5977	0.834748
S189		16.905	18.725	14.777	16.8023	1.976
S190		16.198	16.993	13.642	15.611	1.75092
S191		18.91	14.245	11.333	14.8293	3.82215
S192		16.836	15.817	15.834	16.1623	0.583474
S193		17.665	15.821	12.589	15.3583	2.56943
S194		15.661	17.169	17.87	16.9	1.1288
S195		16.669	15.236	16.563	16.156	0.798504
S196		18.466	15.867	14.747	16.36	1.90789
S197		13.328	12.555	12.355	12.746	0.513851
S198		17.516	15.928	14.519	15.9877	1.49939
S199		17.266	17.986	12.573	15.9417	2.93948
S200		13.328	11.714	11.629	12.2237	0.957325
S201		17.388	14.526	12.26	14.7247	2.56977
S202		13.64	16.631	14.923	15.0647	1.50052
S203		15.019	16.389	12.574	14.6607	1.93258
S204		12.013	14.226	9.141	11.7933	2.54961
S205		15.305	13.969	13.428	14.234	0.966153
S206		NA	NA	14.481	14.481	NA
S207		13.623	14.073	9.496	12.3973	2.52268
S208		14.306	15.676	13.237	14.4063	1.22259
S209		14.354	15.864	12.875	14.3643	1.49453
S210		11.644	13.639	12.844	12.709	1.00433
S211		11.033	15.897	12.997	13.309	2.44696
S212		11.1	13.812	11.225	12.0457	1.53097
S213		14.58	17.085	13.058	14.9077	2.0334
S214		15.712	16.9	13.309	15.307	1.82944
S215		14.262	15.817	11.358	13.8123	2.26325
S216		15.543	14.003	14.238	14.5947	0.829643
S217		13.987	13.984	13.369	13.78	0.35594
S218		16.064	16.909	14.477	15.8167	1.23472
S219		12.163	14.774	13.473	13.47	1.3055
S220		11.52	15.183	11.816	12.8397	2.03478
S221		12.966	14.303	13.079	13.4493	0.741453
S222		15.15	17.955	14.714	15.9397	1.75889
S223		14.403	14.577	15.804	14.928	0.763611
S224		10.648	13.153	12.054	11.9517	1.25563
S225		11.659	15.661	16.291	14.537	2.51225
S226		11.222	14.629	13.533	13.128	1.73923
S227		12.843	17.575	15.024	15.1473	2.36841
S228		16.275	14.953	12.736	14.6547	1.78826
S229		14.207	14.145	15.926	14.7593	1.01084
S232		12.03	14.284	14.917	13.7437	1.51745
S233		11.816	13.022	12.784	12.5407	0.638762
S234		12.062	16.725	13.819	14.202	2.35498
S235		14.844	13.791	11.78	13.4717	1.55676
S236		12.735	12.566	12.214	12.505	0.265803
S238		12.482	NA	11.994	12.238	0.345068
S239		NA	NA	16.898	16.898	NA
S240		16.51	13.034	13.415	14.3197	1.90643
S241		19.032	13.905	12.615	15.184	3.39431
S242		21.325	NA	13.08	17.2025	5.8301
S243		11.091	13.333	13.194	12.5393	1.25622
S244		14.09	16.35	12.844	14.428	1.77727
S245		14.35	15.507	13.483	14.4467	1.01546
S246		11.534	14.209	13.281	13.008	1.35824
S247		12.657	13.695	11.388	12.58	1.15543
S248		13.022	14.098	11.755	12.9583	1.1728
S249		12.338	NA	12.572	12.455	0.165463
S250		13.418	NA	13.128	13.273	0.205061
S251		14.099	13.699	12.188	13.3287	1.00789
S252		12.511	NA	18.122	15.3165	3.96758
S253		12.592	14.112	12.496	13.0667	0.906557
S254		13.65	12.663	12.068	12.7937	0.799053
S255		12.508	15.802	12.727	13.679	1.84183
S256		16.478	NA	15.445	15.9615	0.730441
S257		14.262	NA	13.278	13.77	0.695793
S258		10.438	NA	13.083	11.7605	1.8703
S259		14.693	15.228	13.108	14.343	1.10249
S260		13.35	13.864	12.109	13.1077	0.902247
S261		12.965	13.844	14.483	13.764	0.762155
S262		11.304	14.199	13.776	13.093	1.56369
S264		11.532	NA	12.706	12.119	0.830143
S265		12.484	14.373	11.831	12.896	1.32013
S266		14.133	13.264	13.598	13.665	0.438357
S267		13.731	15.439	12.983	14.051	1.25888
S268		15.064	14.973	13.897	14.6447	0.649095
S269		11.03	12.719	12.128	11.959	0.857089
S270		15.47	16.23	12.721	14.807	1.84606
S271		12.906	14.294	13.873	13.691	0.711673
S272		14.206	14.066	14.054	14.1087	0.0845064
S273		10.958	NA	10.519	10.7385	0.31042
S274		12.566	14.693	13.155	13.4713	1.09822
S275		12.76	13.823	13.629	13.404	0.566093
S276		12.11	14.032	11.317	12.4863	1.39608
S277		10.775	12.419	10.727	11.307	0.963319
S278		9.924	13.426	13.308	12.2193	1.98869
S279		12.522	12.921	14.409	13.284	0.994494
S280		12.004	NA	15.476	13.74	2.45507
S281		12.396	14.86	11.777	13.011	1.63092
S282		15.274	18.422	15.904	16.5333	1.66569
S283		11.651	14.807	14.017	13.4917	1.64227
S284		10.223	14.871	12.287	12.4603	2.32884
S285		11.622	14.828	11.47	12.64	1.89639
S286		16.671	14.081	13.038	14.5967	1.87059
S287		16.357	15.217	20.923	17.499	3.01956
S288		12.184	NA	13.599	12.8915	1.00056
S290		11.25	12.458	10.809	11.5057	0.853712
S291		12.801	14.491	13.677	13.6563	0.84519
S293		13.17	14.165	13.606	13.647	0.498765
S294		13.767	14.511	12.226	13.5013	1.16544
S295		12.866	13.296	12.543	12.9017	0.377765
S296		12.016	13.849	14.28	13.3817	1.20217
S297		13.599	13.591	14.694	13.9613	0.634521
S298		12.434	13.349	12.827	12.87	0.459013
S300		14.414	13.189	14.531	14.0447	0.743335
S301		20.297	13.884	12.409	15.53	4.1937
S302		11.656	14.812	16.039	14.169	2.26114
S304		11.478	14.615	12.019	12.704	1.67694
S305		14.697	14.443	13.6	14.2467	0.574249
S306		13.099	14.947	14.037	14.0277	0.924035
S307		12.782	13.141	12.655	12.8593	0.25206
S309		12.944	14.68	15.033	14.219	1.1182
S310		12.499	13.099	12.316	12.638	0.409589
S311		14.108	14.195	14.466	14.2563	0.186715
S312		12.633	12.066	13.36	12.6863	0.648647
S313		16.114	13.257	12.739	14.0367	1.81757
S314		15.87	14.357	14.097	14.7747	0.957453
S315		12.322	13.836	12.553	12.9037	0.815644
S316		15.878	14.139	15.696	15.2377	0.955815
S317		13.153	12.232	11.889	12.4247	0.653655
S318		12.637	14.419	11.777	12.9443	1.34755
S319		11.039	11.956	11.312	11.4357	0.470842
S320		11.177	14.152	13.526	12.9517	1.56845
S321		12.859	15.149	13.837	13.9483	1.14905
S322		12.106	13.997	14.011	13.3713	1.09583
S323		13.875	15.468	14.224	14.5223	0.837356
S324		12.533	14.561	13.482	13.5253	1.01469
S325		11.244	13.676	13.935	12.9517	1.48454
S326		11.609	12.227	10.422	11.4193	0.917326
S327		12.781	15.812	12.588	13.727	1.80824
S328		12.577	12.895	15.834	13.7687	1.79568
S329		15.065	11.59	11.353	12.6693	2.07809
S330		11.802	13.003	12.694	12.4997	0.623638
S331		15.5	15.615	15.582	15.5657	0.0592143
S332		13.732	NA	13.165	13.4485	0.40093
S333		10.597	NA	17.662	14.1295	4.99571
S334		14.06	14.535	17.772	15.4557	2.02001
S335		10.299	12.611	12.217	11.709	1.23688
R268		9.001	10.989	NA	9.995	1.40573
S336		11.064	12.175	13.344	12.1943	1.14012
S339		14.289	12.415	9.042	11.9153	2.65895
S340		15.592	12.278	12.959	13.6097	1.75019
S342		19.344	14.354	13.023	15.5737	3.33233
S343		18.959	15.582	16.493	17.0113	1.74715
S345		12.907	15.599	17.862	15.456	2.48059
S346		11.039	13.034	13.381	12.4847	1.26395
S347		16.704	12.962	12.642	14.1027	2.2585
S348		16.037	14.445	13.264	14.582	1.39157
S349		17.626	12.079	17.289	15.6647	3.10985
S367		15.513	14.506	14.048	14.689	0.749448
S350		15.058	12.433	12.661	13.384	1.4542
S361		NA	NA	13.965	13.965	NA
R269		NA	NA	NA	NA	NA
S365		NA	NA	13.343	13.343	NA
S366		NA	NA	17.744	17.744	NA
S369		17.942	NA	12.404	15.173	3.91596
S352		14.802	NA	12.744	13.773	1.45523
S368		13.95	12.905	13.94	13.5983	0.600465
S1	RFW	36.178	27.911	14.764	26.2843	10.7993
S2		27.309	17.574	10.076	18.3197	8.64066
S3		22.149	17.659	19.21	19.6727	2.28048
S4		26.908	25.007	18.058	23.3243	4.65877
S5		22.735	23.948	11.929	19.5373	6.61686
S6		18.428	18.865	9.019	15.4373	5.56273
S7		71.178	27.226	14.982	37.7953	29.5513
S8		28.209	17.587	21.54	22.4453	5.36856
S9		19.953	19.021	17.028	18.6673	1.49423
S10		33.626	NA	23.99	28.808	6.81368
S11		22.193	24.239	26.047	24.1597	1.92822
S12		33.245	21.709	18.044	24.3327	7.93286
S13		12.576	20.49	15.191	16.0857	4.03214
S14		23.618	15.835	18.142	19.1983	3.99758
S15		15.396	20.165	17.869	17.81	2.38505
S16		23.179	21.429	12.418	19.0087	5.77436
S17		30.838	NA	18.644	24.741	8.62246
S18		14.68	20.214	18.683	17.859	2.85754
S19		20.014	11.564	14.705	15.4277	4.2711
S20		14.74	15.953	13.159	14.6173	1.40103
S21		16.233	18.013	15.7	16.6487	1.21123
S22		23.183	19.445	25.078	22.5687	2.86631
S23		24.131	12.856	16.085	17.6907	5.80646
S24		24.874	15.485	14.964	18.441	5.57723
S25		19.337	23.562	16.502	19.8003	3.55273
S26		17.96	13.146	13.591	14.899	2.66022
S27		28.613	24.086	17.012	23.237	5.84691
S28		27.58	15.263	16.961	19.9347	6.67526
S29		21.986	11.881	15.584	16.4837	5.11222
S30		26.208	22.92	12.519	20.549	7.14587
S31		23.98	22.635	18.844	21.8197	2.66331
S32		39.212	23.431	22.789	28.4773	9.30203
S33		33.079	16.119	18.304	22.5007	9.22602
S34		32.914	22.505	32.543	29.3207	5.90545
S35		33.548	22.26	22.171	25.993	6.54297
S36		24.878	12.947	17.5	18.4417	6.02098
S37		32.941	18.567	25.623	25.7103	7.1874
S38		21.954	18.353	18.981	19.7627	1.92355
S39		26.607	NA	17.707	22.157	6.29325
S40		16.126	17.611	16.453	16.73	0.78029
S41		14.88	NA	14.082	14.481	0.564271
S42		22.909	13.901	16.074	17.628	4.70077
S43		21.903	16.265	18.283	18.817	2.85668
S44		15.455	14.713	15.939	15.369	0.617508
S45		29.028	14.981	16.284	20.0977	7.76129
S46		18.057	19.916	16.989	18.3207	1.48121
S47		21.362	20.033	24.726	22.0403	2.41892
S48		17.782	14.773	18.128	16.8943	1.84526
S49		17.81	13.709	17.197	16.2387	2.21209
S50		22.873	19.417	14.097	18.7957	4.42087
S51		16.866	NA	12.274	14.57	3.24703
S52		25.546	19.752	21.023	22.107	3.04531
S53		21.684	16.139	25.442	21.0883	4.68002
S54		34.403	NA	12.093	23.248	15.7756
S55		12.564	14.461	20.188	15.7377	3.9691
S56		21.526	18.933	17.768	19.409	1.92369
S57		18.678	13.186	15.306	15.7233	2.76968
S58		27.726	17.075	29.868	24.8897	6.85192
S59		21.708	22.095	22.51	22.1043	0.401081
S60		30.629	23.213	22.257	25.3663	4.5826
S61		15.142	13.127	11.908	13.3923	1.63325
S62		28.013	17.241	17.515	20.923	6.14165
S63		25.697	26.013	31.62	27.7767	3.33217
S64		21.579	15.811	19.093	18.8277	2.89314
S66		20.635	17.266	15.868	17.923	2.45047
S67		27.777	NA	18.518	23.1475	6.5471
S68		17.188	NA	15.001	16.0945	1.54644
S69		28.077	NA	26.051	27.064	1.4326
S70		16.287	14.749	17.717	16.251	1.48433
S71		20.514	15.119	12.514	16.049	4.08028
S72		18.297	16.808	11.844	15.6497	3.37885
S73		24.608	22.347	22.702	23.219	1.21593
S74		20.62	16.07	11.402	16.0307	4.60913
S75		21.241	26.157	22.649	23.349	2.53165
S76		19.463	17.312	25.628	20.801	4.31644
S77		16.898	18.441	13.627	16.322	2.45815
S78		14.234	16.86	22.225	17.773	4.07298
S79		19.148	21.235	22.836	21.073	1.84933
S80		17.958	15.79	21.305	18.351	2.77842
S81		32.174	21.841	31.036	28.3503	5.66589
S82		30.156	13.862	21.984	22.0007	8.14701
S83		16.029	15.511	9.045	13.5283	3.89131
S84		41.997	15.73	19.784	25.837	14.141
S85		23.99	21.027	19.21	21.409	2.41279
S86		12.903	10.84	13.367	12.37	1.34518
S87		25.512	13.38	16.009	18.3003	6.38232
S88		20.974	22.793	16.921	20.2293	3.00599
S89		15.048	9.859	12.041	12.316	2.60541
S90		17.83	14.609	14.614	15.6843	1.8582
S91		18.975	14.057	18.457	17.163	2.70232
S92		19.909	14.516	18.633	17.686	2.81846
S93		NA	12.862	9.725	11.2935	2.21819
S94		25.987	21.153	17.714	21.618	4.15606
S95		21.206	21.487	NA	21.3465	0.198697
S96		25.751	25.011	25.56	25.4407	0.384162
S97		18.822	17.371	24.009	20.0673	3.48983
S98		25.095	17.269	26.533	22.9657	4.98558
S99		25.207	17.237	22.548	21.664	4.05787
S101		28.845	19.138	24.368	24.117	4.85837
S102		24.171	25.099	26.247	25.1723	1.03994
S103		25.176	21.607	14.341	20.3747	5.52162
S104		25.878	19.801	21.182	22.287	3.18563
S105		23.128	15.721	13.262	17.3703	5.13563
S106		20.605	21.254	22.176	21.345	0.789443
S108		16.865	16.305	13.873	15.681	1.59061
S109		20.005	24.877	18.488	21.1233	3.33809
S110		16.943	16.581	21.83	18.4513	2.9316
S111		20.493	18.145	15.654	18.0973	2.41985
S112		22.535	24.361	19.089	21.995	2.67716
S113		18.444	19.06	17.811	18.4383	0.624519
S114		16.209	18.701	20.307	18.4057	2.0649
S115		37.657	20.392	16.742	24.9303	11.1717
S116		32.316	25.43	25.641	27.7957	3.91614
S117		44.066	18.159	24.872	29.0323	13.4452
S118		24.291	25.322	26.851	25.488	1.28805
S119		26.478	12.89	18.301	19.223	6.84076
S121		31.02	17.316	12.715	20.3503	9.52227
S122		21.223	16.317	20.144	19.228	2.57808
S124		22.118	15.417	16.414	17.983	3.61555
S125		17.883	12.952	19.511	16.782	3.4153
S126		22.905	19.605	23.775	22.095	2.19984
S127		22.487	21.62	21.431	21.846	0.563108
S128		18.376	13.137	12.2	14.571	3.32836
S129		30.053	18.767	22.896	23.9053	5.7103
S130		29.436	27.68	23.433	26.8497	3.08644
S131		24.873	22.131	26.688	24.564	2.29416
S132		23.819	22.5	16.871	21.0633	3.69008
S133		19.211	14.507	19.859	17.859	2.92094
S134		21.877	20.439	20.62	20.9787	0.783226
S135		22.596	16.087	20.939	19.874	3.38267
S136		19.813	15.427	18.828	18.0227	2.30123
S137		24.725	17.8	16.699	19.7413	4.35095
S138		19.707	14.975	23.568	19.4167	4.30385
S139		22.011	15.569	23.294	20.2913	4.13967
S140		13.034	10.153	11.305	11.4973	1.4501
S141		19.099	17.872	19.85	18.9403	0.9985
S142		23.532	12.816	12.646	16.3313	6.23654
S143		19.341	16.715	18.413	18.1563	1.33168
S144		16.334	11.162	19.185	15.5603	4.06707
S145		19.626	12.173	13.321	15.04	4.01286
S146		26.505	17.595	14.669	19.5897	6.16496
S147		31.778	16.002	26.768	24.8493	8.06111
S148		31.518	16.632	18.507	22.219	8.10756
S149		20.004	16.687	13.172	16.621	3.41648
S150		45.593	30.46	22.193	32.7487	11.8667
S151		21.466	14.839	15.074	17.1263	3.7601
S152		22.707	17.153	14.094	17.9847	4.36631
S153		22.553	15.577	18.621	18.917	3.49741
S154		19.918	15.79	16.337	17.3483	2.24214
S155		24.075	17.967	20.529	20.857	3.06718
S157		25.411	18.922	20.843	21.7253	3.33327
S158		23.896	27.921	21.777	24.5313	3.12088
S159		14.524	17.063	15.639	15.742	1.27263
S160		21.506	NA	21.151	21.3285	0.251023
S161		23.869	18.073	17.805	19.9157	3.42631
S164		26.771	22.06	16.831	21.8873	4.97225
S165		15.303	23.17	21.345	19.9393	4.11757
S166		26.698	16.332	16.325	19.785	5.98683
S167		24.114	20.628	15.153	19.965	4.51714
S168		21.236	27.257	20.706	23.0663	3.63889
S169		21.905	14.241	12.892	16.346	4.86126
S170		29.659	23.75	22.209	25.206	3.93263
S171		25.627	24.523	20.881	23.677	2.48353
S172		27.285	23.377	20.203	23.6217	3.54733
S173		19.463	21.352	13.246	18.0203	4.2412
S174		23.001	20.346	17.045	20.1307	2.98383
S175		28.868	18.291	15.711	20.9567	6.9718
S176		27.147	21.721	14.918	21.262	6.12741
S177		30.528	19.593	26.988	25.703	5.5796
S178		47.382	24.663	7.033	26.3593	20.2279
S179		23.289	12.317	25.036	20.214	6.89456
S180		15.538	16.849	14.475	15.6207	1.18916
S181		24.614	22.493	13.517	20.208	5.89082
S182		21.263	18.754	22.518	20.845	1.9165
S183		19.763	14.585	13.134	15.8273	3.48475
S184		31.742	28.256	33.844	31.2807	2.82242
S185		15.916	15.313	20.506	17.245	2.84016
S186		30.092	NA	26.578	28.335	2.48477
S187		17.742	21.143	19.963	19.616	1.72685
S188		20.759	20.321	17.221	19.4337	1.9287
S189		28.815	29.573	17.818	25.402	6.57886
S190		26.685	28.547	20.21	25.1473	4.37604
S191		32.307	20.494	12.411	21.7373	10.0061
S192		25.751	21.024	22.293	23.0227	2.44652
S193		26.928	20.395	11.358	19.5603	7.81849
S194		19.852	23.528	20.556	21.312	1.95113
S195		23.308	22.326	33.569	26.401	6.22706
S196		39.905	22.472	29.45	30.609	8.7741
S197		15.642	12.082	13.457	13.727	1.79529
S198		30.01	24.397	23.536	25.981	3.51567
S199		34.099	32.842	18.426	28.4557	8.70866
S200		15.274	10.39	12.44	12.7013	2.45247
S201		21.649	14.965	13.464	16.6927	4.35743
S202		24.209	25.934	26.501	25.548	1.19376
S203		25.436	27.293	18.421	23.7167	4.67923
S204		14.774	16.145	9.544	13.4877	3.48343
S205		28.205	16.639	20.508	21.784	5.88763
S206		NA	NA	19.069	19.069	NA
S207		20.054	19.439	11.932	17.1417	4.52217
S208		20.281	21.417	17.881	19.8597	1.80526
S209		22.91	25.42	19.887	22.739	2.77046
S210		16.692	15.369	16.063	16.0413	0.661766
S211		18.66	26.363	23.233	22.752	3.87396
S212		17.133	19.988	16.223	17.7813	1.96445
S213		24.886	28.544	17.274	23.568	5.74944
S214		25.358	20.699	16.546	20.8677	4.40842
S215		30.281	23.689	18.173	24.0477	6.06196
S216		25.326	15.873	17.652	19.617	5.02352
S217		26.85	16.361	25.903	23.038	5.80181
S218		27.809	20.863	20.244	22.972	4.20038
S219		19.528	23.629	20.303	21.1533	2.17873
S220		13.883	19.544	15.654	16.3603	2.89584
S221		22.708	15.667	18.533	18.9693	3.54072
S222		29.725	30.172	28.387	29.428	0.928823
S223		25.865	16.569	23.255	21.8963	4.79462
S224		16.574	16.163	16.818	16.5183	0.331029
S225		18.067	20.518	22.61	20.3983	2.27386
S226		17.69	23.157	26.632	22.493	4.50783
S227		29.573	32.181	27.371	29.7083	2.40785
S228		15.324	21.811	18.801	18.6453	3.2463
S229		20.092	17.603	27.05	21.5817	4.89651
S232		15.432	17.715	26.313	19.82	5.7378
S233		19.471	14.908	19.891	18.09	2.76368
S234		19.071	23.365	20.269	20.9017	2.21581
S235		26.011	19.984	19.023	21.6727	3.78771
S236		16.264	13.914	15.47	15.216	1.19541
S238		27.546	NA	16.677	22.1115	7.68554
S239		NA	NA	20.806	20.806	NA
S240		25.642	17.515	18.679	20.612	4.39482
S241		23.138	14.325	12.934	16.799	5.53362
S242		33.09	NA	15.152	24.121	12.6841
S243		17.64	14.671	19.678	17.3297	2.51788
S244		21.551	18.24	17.402	19.0643	2.1939
S245		29.108	22.708	17.434	23.0833	5.84604
S246		16.925	19.187	17.746	17.9527	1.14507
S247		19.378	19.299	14.139	17.6053	3.00219
S248		21.349	17.231	14.391	17.657	3.49851
S249		19.283	NA	17.253	18.268	1.43543
S250		25.463	NA	20.897	23.18	3.22865
S251		26.029	15.438	16.971	19.4793	5.72373
S252		19.732	NA	31.407	25.5695	8.25547
S253		17.697	14.643	17.381	16.5737	1.67946
S254		24.899	13.085	14.548	17.5107	6.44016
S255		23.457	22.729	22.517	22.901	0.49304
S256		43.225	NA	26.682	34.9535	11.6977
S257		25.752	NA	18.38	22.066	5.21279
S258		12.508	NA	15.183	13.8455	1.89151
S259		24.045	20.326	16.464	20.2783	3.79072
S260		20.674	18.447	17.719	18.9467	1.53956
S261		21.319	16.611	22.407	20.1123	3.08066
S262		19.609	19.765	22.988	20.7873	1.90743
S264		18.291	NA	19.976	19.1335	1.19147
S265		16.76	19.41	15.265	17.145	2.09915
S266		20.797	17.279	21.36	19.812	2.21163
S267		22.995	21.683	21.621	22.0997	0.776001
S268		25.704	24.857	27.518	26.0263	1.35947
S269		24.185	21.037	23.978	23.0667	1.76079
S270		21.19	20.618	16.092	19.3	2.79289
S271		25.018	19.071	22.832	22.307	3.00806
S272		31.405	20.915	25.051	25.7903	5.28394
S273		18.618	NA	12.796	15.707	4.11678
S274		30.126	25.177	26.685	27.3293	2.53664
S275		24.153	18.997	21.646	21.5987	2.57833
S276		18.747	20.552	12.689	17.3293	4.11874
S277		19.89	13.977	7.008	13.625	6.44821
S278		17.154	19.332	18.699	18.395	1.12037
S279		14.236	14.49	21.684	16.8033	4.22869
S280		20.382	NA	30.686	25.534	7.28603
S281		21.192	19.565	19.449	20.0687	0.974563
S282		34.526	31.239	25.837	30.534	4.38719
S283		22.23	18.892	21.657	20.9263	1.78493
S284		14.62	15.724	14.445	14.9297	0.693455
S285		20.86	16.786	8.123	15.2563	6.50482
S286		38.253	16.513	17.119	23.9617	12.3804
S287		42.178	19.231	36.648	32.6857	11.9757
S288		14.304	NA	16.987	15.6455	1.89717
S290		19.056	16.144	13.376	16.192	2.8403
S291		24.672	16.001	20.678	20.4503	4.33998
S293		21.883	19.487	17.917	19.7623	1.99728
S294		30.799	27.431	20.286	26.172	5.36839
S295		24.205	19.182	19.932	21.1063	2.7096
S296		23.513	14.695	21.169	19.7923	4.56735
S297		26.211	20.391	23.164	23.2553	2.91107
S298		23.427	17.662	16.331	19.14	3.77183
S300		29.829	16.568	30.407	25.6013	7.82843
S301		35.08	18.839	19.347	24.422	9.23359
S302		26.191	20.566	27.306	24.6877	3.61274
S304		19.486	27.361	19.123	21.99	4.65496
S305		39.547	23.655	24.396	29.1993	8.969
S306		28.428	21.307	21.071	23.602	4.1811
S307		24.613	15.117	20.232	19.9873	4.75273
S309		22.334	18.294	22.067	20.8983	2.25937
S310		26.296	15.28	15.933	19.1697	6.18022
S311		29.35	22.715	22.427	24.8307	3.91651
S312		27.22	14.816	18.485	20.1737	6.37209
S313		35.227	20.297	19.021	24.8483	9.0108
S314		27.965	21.2	19.632	22.9323	4.42837
S315		21.583	20.093	17.753	19.8097	1.93066
S316		27.484	23.071	24.203	24.9193	2.29205
S317		17.696	12.143	18.581	16.14	3.48967
S318		21.14	16.044	12.306	16.4967	4.43436
S319		20.223	14.806	16.539	17.1893	2.76644
S320		19.19	20.3	25.968	21.8193	3.63546
S321		28.695	25.133	25.557	26.4617	1.94571
S322		20.67	17.898	19.63	19.3993	1.40032
S323		21.671	21.363	19.217	20.7503	1.33681
S324		23.48	19.01	20.643	21.0443	2.26186
S325		15.681	13.47	18.614	15.9217	2.58043
S326		21.973	14.366	11.823	16.054	5.28135
S327		26.898	18.842	14.712	20.1507	6.19751
S328		21.059	12.999	21.931	18.663	4.92451
S329		20.911	11.463	13.233	15.2023	5.02244
S330		18.219	16.125	15.611	16.6517	1.38147
S331		32.709	17.77	22.915	24.4647	7.58911
S332		25.014	NA	21.26	23.137	2.65448
S333		17.412	NA	27.549	22.4805	7.16794
S334		28.2	17.001	35.717	26.9727	9.41817
S335		15.535	12.895	16.611	15.0137	1.91207
R268		12.844	9.837	NA	11.3405	2.12627
S336		21.158	17.166	22.512	20.2787	2.77936
S339		19.669	14.651	8.258	14.1927	5.71929
S340		21.787	13.634	12.786	16.069	4.97005
S342		36.637	23.61	25.062	28.4363	7.139
S343		33.746	23.247	29.933	28.9753	5.31461
S345		21.219	19.979	36.443	25.8803	9.16852
S346		15.904	13.726	15.606	15.0787	1.18088
S347		27.736	15.791	17.866	20.4643	6.38234
S348		23.583	17.563	15.542	18.896	4.18295
S349		18.001	8.671	22.418	16.3633	7.0183
S367		19.305	14.883	19.356	17.848	2.56789
S350		18.725	13.019	16.353	16.0323	2.86648
S361		NA	NA	23.604	23.604	NA
R269		NA	NA	NA	NA	NA
S365		NA	NA	9.852	9.852	NA
S366		NA	NA	20.881	20.881	NA
S369		22.54	NA	12.479	17.5095	7.1142
S352		22.193	NA	16.441	19.317	4.06728
S368		25.297	15.907	24.759	21.9877	5.27288
S1	RDW	6.55	NA	NA	6.55	NA
S2		5.746	NA	NA	5.746	NA
S3		5.184	NA	NA	5.184	NA
S4		5.312	NA	NA	5.312	NA
S5		5.774	NA	NA	5.774	NA
S6		4.708	NA	NA	4.708	NA
S7		13.446	NA	NA	13.446	NA
S8		6.106	NA	NA	6.106	NA
S9		4.25	NA	NA	4.25	NA
S10		6.696	NA	NA	6.696	NA
S11		3.176	NA	NA	3.176	NA
S12		7.568	NA	NA	7.568	NA
S13		3.425	NA	NA	3.425	NA
S14		4.456	NA	NA	4.456	NA
S15		3.485	NA	NA	3.485	NA
S16		4.846	NA	NA	4.846	NA
S17		6.145	NA	NA	6.145	NA
S18		2.694	NA	NA	2.694	NA
S19		3.416	NA	NA	3.416	NA
S20		3.05	NA	NA	3.05	NA
S21		3.779	NA	NA	3.779	NA
S22		4.905	NA	NA	4.905	NA
S23		10.202	NA	NA	10.202	NA
S24		4.927	NA	NA	4.927	NA
S25		4.642	NA	NA	4.642	NA
S26		3.581	NA	NA	3.581	NA
S27		5.952	NA	NA	5.952	NA
S28		5.481	NA	NA	5.481	NA
S29		5.08	NA	NA	5.08	NA
S30		2.757	NA	NA	2.757	NA
S31		4.095	NA	NA	4.095	NA
S32		7.469	NA	NA	7.469	NA
S33		6.7	NA	NA	6.7	NA
S34		6.462	NA	NA	6.462	NA
S35		7.435	NA	NA	7.435	NA
S36		4.627	NA	NA	4.627	NA
S37		6.587	NA	NA	6.587	NA
S38		5.033	NA	NA	5.033	NA
S39		5.571	NA	NA	5.571	NA
S40		3.779	NA	NA	3.779	NA
S41		3.874	NA	NA	3.874	NA
S42		5.078	NA	NA	5.078	NA
S43		4.681	NA	NA	4.681	NA
S44		3.323	NA	NA	3.323	NA
S45		4.636	NA	NA	4.636	NA
S46		3.353	NA	NA	3.353	NA
S47		3.86	NA	NA	3.86	NA
S48		3.844	NA	NA	3.844	NA
S49		3.558	NA	NA	3.558	NA
S50		4.252	NA	NA	4.252	NA
S51		3.468	NA	NA	3.468	NA
S52		4.4	NA	NA	4.4	NA
S53		4.832	NA	NA	4.832	NA
S54		7.663	NA	NA	7.663	NA
S55		5.626	NA	NA	5.626	NA
S56		4.094	NA	NA	4.094	NA
S57		3.947	NA	NA	3.947	NA
S58		4.678	NA	NA	4.678	NA
S59		5.491	NA	NA	5.491	NA
S60		5.218	NA	NA	5.218	NA
S61		2.699	NA	NA	2.699	NA
S62		7.478	NA	NA	7.478	NA
S63		5.567	NA	NA	5.567	NA
S64		4.842	NA	NA	4.842	NA
S66		3.564	NA	NA	3.564	NA
S67		4.607	NA	NA	4.607	NA
S68		3.99	NA	NA	3.99	NA
S69		6.522	NA	NA	6.522	NA
S70		3.013	NA	NA	3.013	NA
S71		4.419	NA	NA	4.419	NA
S72		3.975	NA	NA	3.975	NA
S73		4.945	NA	NA	4.945	NA
S74		5.133	NA	NA	5.133	NA
S75		4.279	NA	NA	4.279	NA
S76		4.265	NA	NA	4.265	NA
S77		3.917	NA	NA	3.917	NA
S78		3.566	NA	NA	3.566	NA
S79		4.327	NA	NA	4.327	NA
S80		4.245	NA	NA	4.245	NA
S81		5.669	NA	NA	5.669	NA
S82		4.877	NA	NA	4.877	NA
S83		3.004	NA	NA	3.004	NA
S84		6.21	NA	NA	6.21	NA
S85		5.879	NA	NA	5.879	NA
S86		2.923	NA	NA	2.923	NA
S87		5.543	NA	NA	5.543	NA
S88		5.298	NA	NA	5.298	NA
S89		2.935	NA	NA	2.935	NA
S90		2.885	NA	NA	2.885	NA
S91		2.974	NA	NA	2.974	NA
S92		2.946	NA	NA	2.946	NA
S93		NA	NA	NA	NA	NA
S94		3.105	NA	NA	3.105	NA
S95		4.575	NA	NA	4.575	NA
S96		4.869	NA	NA	4.869	NA
S97		2.953	NA	NA	2.953	NA
S98		5.385	NA	NA	5.385	NA
S99		3.329	NA	NA	3.329	NA
S101		4.398	NA	NA	4.398	NA
S102		3.512	NA	NA	3.512	NA
S103		4.406	NA	NA	4.406	NA
S104		5.325	NA	NA	5.325	NA
S105		4.137	NA	NA	4.137	NA
S106		4.108	NA	NA	4.108	NA
S108		3.72	NA	NA	3.72	NA
S109		4.195	NA	NA	4.195	NA
S110		5.153	NA	NA	5.153	NA
S111		4.358	NA	NA	4.358	NA
S112		5.517	NA	NA	5.517	NA
S113		4.282	NA	NA	4.282	NA
S114		3.789	NA	NA	3.789	NA
S115		5.598	NA	NA	5.598	NA
S116		7.825	NA	NA	7.825	NA
S117		9.368	NA	NA	9.368	NA
S118		5.696	NA	NA	5.696	NA
S119		3.255	NA	NA	3.255	NA
S121		4.136	NA	NA	4.136	NA
S122		3.709	NA	NA	3.709	NA
S124		3.543	NA	NA	3.543	NA
S125		3.41	NA	NA	3.41	NA
S126		4.376	NA	NA	4.376	NA
S127		3.886	NA	NA	3.886	NA
S128		3.902	NA	NA	3.902	NA
S129		4.986	NA	NA	4.986	NA
S130		4.566	NA	NA	4.566	NA
S131		4.402	NA	NA	4.402	NA
S132		5.269	NA	NA	5.269	NA
S133		4.438	NA	NA	4.438	NA
S134		4.748	NA	NA	4.748	NA
S135		3.909	NA	NA	3.909	NA
S136		3.64	NA	NA	3.64	NA
S137		4.399	NA	NA	4.399	NA
S138		3.613	NA	NA	3.613	NA
S139		4.77	NA	NA	4.77	NA
S140		2.712	NA	NA	2.712	NA
S141		4.229	NA	NA	4.229	NA
S142		3.646	NA	NA	3.646	NA
S143		4.534	NA	NA	4.534	NA
S144		3.6	NA	NA	3.6	NA
S145		3.866	NA	NA	3.866	NA
S146		5.07	NA	NA	5.07	NA
S147		5.335	NA	NA	5.335	NA
S148		5.721	NA	NA	5.721	NA
S149		3.427	NA	NA	3.427	NA
S150		7.804	NA	NA	7.804	NA
S151		4.309	NA	NA	4.309	NA
S152		3.623	NA	NA	3.623	NA
S153		4.093	NA	NA	4.093	NA
S154		3.913	NA	NA	3.913	NA
S155		4.997	NA	NA	4.997	NA
S157		4.66	NA	NA	4.66	NA
S158		5.064	NA	NA	5.064	NA
S159		2.846	NA	NA	2.846	NA
S160		5.952	NA	NA	5.952	NA
S161		5.449	NA	NA	5.449	NA
S164		4.263	NA	NA	4.263	NA
S165		3.611	NA	NA	3.611	NA
S166		6.529	NA	NA	6.529	NA
S167		3.668	NA	NA	3.668	NA
S168		4.489	NA	NA	4.489	NA
S169		5.106	NA	NA	5.106	NA
S170		5.572	NA	NA	5.572	NA
S171		5.74	NA	NA	5.74	NA
S172		5.882	NA	NA	5.882	NA
S173		3.819	NA	NA	3.819	NA
S174		4.136	NA	NA	4.136	NA
S175		5.914	NA	NA	5.914	NA
S176		4.188	NA	NA	4.188	NA
S177		5.895	NA	NA	5.895	NA
S178		11.368	NA	NA	11.368	NA
S179		5.306	NA	NA	5.306	NA
S180		3.196	NA	NA	3.196	NA
S181		5.499	NA	NA	5.499	NA
S182		4.967	NA	NA	4.967	NA
S183		3.008	NA	NA	3.008	NA
S184		7.109	NA	NA	7.109	NA
S185		3.855	NA	NA	3.855	NA
S186		5.099	NA	NA	5.099	NA
S187		4.226	NA	NA	4.226	NA
S188		4.578	NA	NA	4.578	NA
S189		5.697	NA	NA	5.697	NA
S190		6.232	NA	NA	6.232	NA
S191		7.682	NA	NA	7.682	NA
S192		4.496	NA	NA	4.496	NA
S193		2.922	NA	NA	2.922	NA
S194		2.584	NA	NA	2.584	NA
S195		4.459	NA	NA	4.459	NA
S196		4.884	NA	NA	4.884	NA
S197		2.936	NA	NA	2.936	NA
S198		2.452	NA	NA	2.452	NA
S199		6.687	NA	NA	6.687	NA
S200		2.562	NA	NA	2.562	NA
S201		4.162	NA	NA	4.162	NA
S202		4.353	NA	NA	4.353	NA
S203		5.166	NA	NA	5.166	NA
S204		2.143	NA	NA	2.143	NA
S205		5.537	NA	NA	5.537	NA
S206		NA	NA	NA	NA	NA
S207		3.972	NA	NA	3.972	NA
S208		3.176	NA	NA	3.176	NA
S209		3.843	NA	NA	3.843	NA
S210		2.925	NA	NA	2.925	NA
S211		3.216	NA	NA	3.216	NA
S212		2.358	NA	NA	2.358	NA
S213		3.704	NA	NA	3.704	NA
S214		4.51	NA	NA	4.51	NA
S215		3.901	NA	NA	3.901	NA
S216		3.81	NA	NA	3.81	NA
S217		3.646	NA	NA	3.646	NA
S218		4.164	NA	NA	4.164	NA
S219		3.426	NA	NA	3.426	NA
S220		2.135	NA	NA	2.135	NA
S221		3.286	NA	NA	3.286	NA
S222		4.093	NA	NA	4.093	NA
S223		4.43	NA	NA	4.43	NA
S224		3.004	NA	NA	3.004	NA
S225		2.409	NA	NA	2.409	NA
S226		2.606	NA	NA	2.606	NA
S227		4.26	NA	NA	4.26	NA
S228		3.395	NA	NA	3.395	NA
S229		3.141	NA	NA	3.141	NA
S232		2.963	NA	NA	2.963	NA
S233		2.75	NA	NA	2.75	NA
S234		4.064	NA	NA	4.064	NA
S235		4.761	NA	NA	4.761	NA
S236		3.428	NA	NA	3.428	NA
S238		4.891	NA	NA	4.891	NA
S239		NA	NA	NA	NA	NA
S240		6.242	NA	NA	6.242	NA
S241		3.28	NA	NA	3.28	NA
S242		6.091	NA	NA	6.091	NA
S243		2.397	NA	NA	2.397	NA
S244		3.937	NA	NA	3.937	NA
S245		4.227	NA	NA	4.227	NA
S246		3.44	NA	NA	3.44	NA
S247		3.031	NA	NA	3.031	NA
S248		3.79	NA	NA	3.79	NA
S249		3.475	NA	NA	3.475	NA
S250		3.846	NA	NA	3.846	NA
S251		4.051	NA	NA	4.051	NA
S252		3.786	NA	NA	3.786	NA
S253		2.983	NA	NA	2.983	NA
S254		4.456	NA	NA	4.456	NA
S255		4.628	NA	NA	4.628	NA
S256		3.657	NA	NA	3.657	NA
S257		3.647	NA	NA	3.647	NA
S258		2.056	NA	NA	2.056	NA
S259		4.566	NA	NA	4.566	NA
S260		3.314	NA	NA	3.314	NA
S261		3.335	NA	NA	3.335	NA
S262		3.68	NA	NA	3.68	NA
S264		3.292	NA	NA	3.292	NA
S265		3.252	NA	NA	3.252	NA
S266		4.49	NA	NA	4.49	NA
S267		2.995	NA	NA	2.995	NA
S268		4.543	NA	NA	4.543	NA
S269		3.634	NA	NA	3.634	NA
S270		3.91	NA	NA	3.91	NA
S271		4.199	NA	NA	4.199	NA
S272		5.132	NA	NA	5.132	NA
S273		4.183	NA	NA	4.183	NA
S274		4.96	NA	NA	4.96	NA
S275		3.863	NA	NA	3.863	NA
S276		3.944	NA	NA	3.944	NA
S277		3.218	NA	NA	3.218	NA
S278		2.388	NA	NA	2.388	NA
S279		2.682	NA	NA	2.682	NA
S280		3.087	NA	NA	3.087	NA
S281		2.875	NA	NA	2.875	NA
S282		4.622	NA	NA	4.622	NA
S283		2.837	NA	NA	2.837	NA
S284		2.189	NA	NA	2.189	NA
S285		2.317	NA	NA	2.317	NA
S286		3.698	NA	NA	3.698	NA
S287		3.041	NA	NA	3.041	NA
S288		2.756	NA	NA	2.756	NA
S290		3.531	NA	NA	3.531	NA
S291		4.105	NA	NA	4.105	NA
S293		3.595	NA	NA	3.595	NA
S294		4.434	NA	NA	4.434	NA
S295		3.349	NA	NA	3.349	NA
S296		3.395	NA	NA	3.395	NA
S297		4.237	NA	NA	4.237	NA
S298		3.706	NA	NA	3.706	NA
S300		6.167	NA	NA	6.167	NA
S301		7.507	NA	NA	7.507	NA
S302		3.163	NA	NA	3.163	NA
S304		2.853	NA	NA	2.853	NA
S305		6.906	NA	NA	6.906	NA
S306		3.7	NA	NA	3.7	NA
S307		4.395	NA	NA	4.395	NA
S309		3.44	NA	NA	3.44	NA
S310		2.306	NA	NA	2.306	NA
S311		5.471	NA	NA	5.471	NA
S312		3.701	NA	NA	3.701	NA
S313		5.337	NA	NA	5.337	NA
S314		5.57	NA	NA	5.57	NA
S315		4.568	NA	NA	4.568	NA
S316		6.182	NA	NA	6.182	NA
S317		2.443	NA	NA	2.443	NA
S318		4.319	NA	NA	4.319	NA
S319		3.471	NA	NA	3.471	NA
S320		3.71	NA	NA	3.71	NA
S321		3.23	NA	NA	3.23	NA
S322		4.09	NA	NA	4.09	NA
S323		4.732	NA	NA	4.732	NA
S324		3.81	NA	NA	3.81	NA
S325		2.763	NA	NA	2.763	NA
S326		3.99	NA	NA	3.99	NA
S327		3.726	NA	NA	3.726	NA
S328		3.91	NA	NA	3.91	NA
S329		4.193	NA	NA	4.193	NA
S330		3.509	NA	NA	3.509	NA
S331		5.552	NA	NA	5.552	NA
S332		5.05	NA	NA	5.05	NA
S333		2.231	NA	NA	2.231	NA
S334		3.673	NA	NA	3.673	NA
S335		2.757	NA	NA	2.757	NA
R268		1.676	NA	NA	1.676	NA
S336		3.871	NA	NA	3.871	NA
S339		3.939	NA	NA	3.939	NA
S340		4.257	NA	NA	4.257	NA
S342		9.912	NA	NA	9.912	NA
S343		6.607	NA	NA	6.607	NA
S345		4.579	NA	NA	4.579	NA
S346		2.172	NA	NA	2.172	NA
S347		5.129	NA	NA	5.129	NA
S348		4.284	NA	NA	4.284	NA
S349		3.219	NA	NA	3.219	NA
S367		3.381	NA	NA	3.381	NA
S350		4.136	NA	NA	4.136	NA
S361		NA	NA	NA	NA	NA
R269		NA	NA	NA	NA	NA
S365		NA	NA	NA	NA	NA
S366		NA	NA	NA	NA	NA
S369		5.478	NA	NA	5.478	NA
S352		4.41	NA	NA	4.41	NA
S368		5.047	NA	NA	5.047	NA
S1	TRL	1531.03	344.388	182.528	685.983	736.296
S2		1813.57	268.805	139.259	740.543	931.52
S3		2071.8	615.341	347.258	1011.47	928.009
S4		799.885	240.108	246.923	428.972	321.238
S5		1486.49	936.214	157.872	860.193	667.565
S6		1524.54	860.281	185.596	856.805	669.478
S7		4316.09	1156.08	97.244	1856.47	2194.9
S8		336.452	304.181	117.667	252.767	118.107
S9		2268.14	658.265	291.623	1072.68	1051.41
S10		2282.52	NA	452.272	1367.4	1294.18
S11		1820.51	502.33	293.41	872.085	827.98
S12		1638.31	1076.25	533.447	1082.67	552.458
S13		1521.75	590.66	211.798	774.736	674.097
S14		1619.32	802.15	352.885	924.786	642.063
S15		822.843	898.505	311.146	677.498	319.518
S16		1161.09	301.751	120.786	527.877	555.796
S17		1816.42	NA	219.831	1018.12	1128.96
S18		1523.43	425.023	187.562	712.004	712.672
S19		1065.68	215.437	560.148	613.754	427.647
S20		1053.84	378.864	133.421	522.041	476.62
S21		1345.44	623.915	271.256	746.872	547.548
S22		1122.15	386.664	278.644	595.82	459.005
S23		1389.09	465.245	276.775	710.369	595.293
S24		1608.81	632.493	176.927	806.078	731.555
S25		1379.01	608.346	264.637	750.666	570.658
S26		899.204	321.769	196.47	472.481	374.826
S27		1506.02	411.202	215.395	710.872	695.542
S28		1647.5	307.31	257.399	737.403	788.563
S29		1684.53	468.027	180.993	777.849	798.214
S30		1760.92	813.445	176.434	916.935	797.299
S31		984.706	673.939	540.946	733.197	227.737
S32		1744.76	498.745	504.439	915.981	717.748
S33		1290.18	394.683	547.552	744.14	479.026
S34		1948.2	382.441	1032.54	1121.06	786.626
S35		1675.34	492.694	389.171	852.403	714.565
S36		1956.4	396.268	366.322	906.329	909.508
S37		1974.8	616.276	451.414	1014.16	836.009
S38		1678.99	508.676	356.288	847.984	723.692
S39		1329.91	NA	418.783	874.344	644.261
S40		878.078	786.111	464.6	709.596	217.099
S41		1066.67	NA	387.101	726.886	480.528
S42		1290.7	297.784	270.153	619.544	581.399
S43		1209.79	392.57	247.919	616.76	518.648
S44		1048.05	389.163	315.51	584.241	403.355
S45		1613.32	435.58	251.727	766.876	738.784
S46		1972.8	930.081	1231.05	1377.97	536.661
S47		1608.87	720.326	366.199	898.464	640.2
S48		1981.47	817.798	524.96	1108.08	770.423
S49		1309.93	401.522	346.52	685.992	541.05
S50		1652.18	712.783	357.378	907.447	668.991
S51		1641.39	NA	302.861	972.127	946.485
S52		1220.79	577.422	151.417	649.875	538.354
S53		1974.9	772.369	617.334	1121.53	743.089
S54		1503.87	NA	251.044	877.459	885.885
S55		1014.68	480.878	392.267	629.274	336.696
S56		1161.29	770.728	587.931	839.981	292.883
S57		896.8	179.43	237.206	437.812	398.544
S58		316.164	213.448	178.728	236.113	71.4664
S59		464.803	211.39	175.19	283.794	157.8
S60		1729.37	561.469	239.839	843.56	783.81
S61		743.309	326.325	207.665	425.766	281.327
S62		1275.91	506.648	511.13	764.564	442.848
S63		703.377	264.713	189.959	386.016	277.372
S64		1734.82	599.599	322.338	885.586	748.41
S66		1509.71	852.114	327.691	896.504	592.257
S67		1334.61	NA	235.591	785.102	777.127
S68		528	NA	193.487	360.743	236.536
S69		1081.68	NA	331.323	706.503	530.584
S70		794.649	454.871	476.172	575.231	190.32
S71		1432.69	534.429	291.673	752.93	601.07
S72		895.222	247.27	326.676	489.723	353.41
S73		1421.18	1033.26	418.221	957.554	505.749
S74		898.002	325.587	181.934	468.508	378.825
S75		686.089	396.695	242.646	441.81	225.138
S76		515.966	523.446	252.201	430.538	154.489
S77		461.942	327.939	196.143	328.675	132.901
S78		456.007	377.026	248.492	360.508	104.739
S79		1069.82	793.198	409.48	757.498	331.613
S80		809.411	250.865	224.412	428.229	330.378
S81		1832.66	430.641	449.689	904.33	804.013
S82		1752.07	538.059	279.528	856.552	786.24
S83		872.378	527.526	188.35	529.418	342.018
S84		2141.57	259.283	181.393	860.75	1109.91
S85		1866.39	1423.72	459.698	1249.93	719.266
S86		701.711	195.848	254.739	384.099	276.631
S87		1503.81	628.39	314.397	815.531	616.393
S88		1085.14	475.203	267.79	609.379	424.876
S89		590.922	141.274	120.916	284.371	265.676
S90		297.401	252.556	157.271	235.743	71.562
S91		1003.21	685.88	314.294	667.795	344.814
S92		1235.97	404.252	252.674	630.966	529.404
S93		NA	583.707	229.829	406.768	250.23
S94		1388.12	615.862	259.709	754.562	576.848
S95		1407.81	541.113	NA	974.464	612.85
S96		1361.47	720.306	330.687	804.156	520.484
S97		1123.57	716.676	419.72	753.322	353.354
S98		1460.46	1144.37	443.626	1016.16	520.404
S99		1695.88	490.516	465.324	883.906	703.301
S101		1484.7	216.264	305.75	668.904	707.913
S102		1657.16	995.645	263.88	972.228	696.934
S103		2032.16	671.44	299.753	1001.12	912.046
S104		1898.2	545.438	427.829	957.155	817.087
S105		889.614	393.579	147.131	476.775	378.168
S106		1128.55	683.262	424.928	745.581	355.928
S108		1216.59	430.921	377.963	675.157	469.639
S109		1349.65	485.158	437.599	757.47	513.397
S110		739.236	351.419	569.042	553.232	194.391
S111		1334.9	876.531	294.753	835.395	521.293
S112		1701.62	645.614	482.812	943.347	661.706
S113		808.545	702.173	402.495	637.738	210.554
S114		409.07	294.608	245.64	316.439	83.8737
S115		1111.17	495.96	361.12	656.083	399.841
S116		1232.13	748.652	340.667	773.816	446.263
S117		839.631	239.372	289.979	456.327	332.914
S118		1496.89	542.681	332.265	790.612	620.637
S119		1112.4	336.484	341.375	596.753	446.571
S121		1631.84	744.194	219.843	865.292	713.744
S122		1243.47	589.625	457.251	763.448	420.946
S124		950.14	297.063	330.778	525.994	367.708
S125		753.597	504.224	461.754	573.192	157.672
S126		738.274	381.767	353.309	491.117	214.517
S127		1000.24	690.995	370.93	687.387	314.669
S128		1077.2	635.631	368.791	693.875	357.779
S129		1382.1	453.276	341.632	725.668	571.217
S130		1259.65	533.88	253.483	682.338	519.253
S131		1718.02	507.091	673.172	966.093	656.458
S132		1340.15	666.537	364.93	790.54	499.296
S133		989.788	269.009	305.672	521.49	405.972
S134		1426.27	552.131	624.767	867.721	485.075
S135		1364.29	562.906	290.413	739.202	558.221
S136		1332.5	739.34	444.554	838.798	452.252
S137		1159.24	696.375	384.495	746.705	389.819
S138		774.015	326.243	296.405	465.554	267.551
S139		1864.64	607.917	347.53	940.029	811.252
S140		1485.27	645.859	423.423	851.516	559.999
S141		1208.25	667.644	299.826	725.241	456.944
S142		829.949	516.447	298.204	548.2	267.291
S143		1063.86	634.925	454.695	717.825	312.927
S144		749.873	356.588	541.101	549.187	196.767
S145		754.395	356.939	903.376	671.57	282.477
S146		1113.17	499.126	356.391	656.228	402.104
S147		955.781	612.776	541.367	703.308	221.544
S148		1287.7	525.589	448.54	753.943	463.85
S149		933.59	519.36	200.083	551.011	367.776
S150		1350.73	239.211	297.042	628.994	625.709
S151		801.812	516.513	343.81	554.045	231.296
S152		1267.39	377.454	392.354	679.068	509.561
S153		991.409	445.703	294.749	577.287	366.496
S154		886.84	653.671	363.646	634.719	262.111
S155		1514.48	522.933	390.298	809.239	614.351
S157		1691.89	643.373	297.254	877.506	726.2
S158		1202.05	576.143	395.512	724.57	423.262
S159		724.483	287.403	199.236	403.707	281.276
S160		775.103	NA	482.432	628.767	206.95
S161		1407.43	542.933	396.894	782.419	546.179
S164		1682.89	759.484	212.615	884.996	743.13
S165		1228.8	731.929	404.916	788.55	414.852
S166		1323.16	471.397	358.187	717.581	527.492
S167		2431.75	733.831	233.753	1133.11	1152.11
S168		518.567	273.905	469.539	420.67	129.445
S169		2259.47	536.09	234.114	1009.89	1092.65
S170		1322.92	412.884	148.819	628.209	615.958
S171		1476.17	478.004	666.783	873.651	530.262
S172		2727.3	714.446	410.749	1284.16	1258.98
S173		1122.05	591.94	280.615	664.867	425.43
S174		862.737	331.221	260.874	484.944	329.064
S175		1794.55	771.835	346.685	971.023	744.201
S176		1044.85	439.564	169.595	551.337	448.206
S177		1982.96	576.105	338.597	965.886	888.778
S178		1420.11	329.217	144.539	631.288	689.351
S179		665.612	385.813	269.385	440.27	203.65
S180		898.35	521.544	222.697	547.53	338.575
S181		1917.58	632.974	176.341	908.966	902.834
S182		1213.22	700.273	450.864	788.119	388.696
S183		1524.76	691.031	544.043	919.944	528.916
S184		2264.74	752.959	632.351	1216.68	909.648
S185		1407.46	652.548	374.208	811.406	534.632
S186		2017.26	NA	258.054	1137.65	1243.94
S187		1468.5	432.128	195.735	698.787	676.987
S188		2510.87	1127.73	460.689	1366.43	1045.72
S189		1298.25	138.682	94.33	510.422	682.643
S190		1883.38	664.894	183.615	910.63	876.123
S191		1099.67	908.247	235.195	747.705	454.049
S192		2516.83	956.097	1054.36	1509.1	874.107
S193		583.084	298.064	152.828	344.659	218.88
S194		1123.43	466.435	254.257	614.707	453.159
S195		1123.35	747.001	553.732	808.027	289.669
S196		2445.99	458.338	295.592	1066.64	1197.32
S197		1088.2	510.025	265.968	621.396	422.276
S198		1235.62	496.317	376.983	702.974	465.13
S199		1583.18	727.273	252.995	854.481	674.153
S200		414.362	179.189	311.339	301.63	117.887
S201		1345.25	400.244	266.569	670.687	587.998
S202		1365.41	608.374	390.568	788.117	511.673
S203		1550.65	593.325	381.003	841.658	623.112
S204		1244.14	754.025	296.17	764.778	474.076
S205		2128.09	699.572	470.601	1099.42	898.181
S206		NA	NA	231.717	231.717	NA
S207		1327.77	994.141	237.651	853.188	558.562
S208		922.302	510.112	178.078	536.831	372.831
S209		1398.58	832.871	511.858	914.435	448.951
S210		1723.45	475.608	298.835	832.63	776.517
S211		1963.58	579.373	453.729	998.892	837.798
S212		688.163	375.869	367.051	477.028	182.902
S213		647.397	295.459	210.772	384.543	231.543
S214		536.501	268.054	353.172	385.909	137.185
S215		1306.35	496.542	404.487	735.792	496.254
S216		618.812	307.101	321.943	415.952	175.839
S217		1234.92	404.809	339.901	659.877	499.06
S218		1201.63	744.066	316.825	754.173	442.488
S219		771.8	542.662	276.538	530.333	247.861
S220		907.211	234.645	221.362	454.406	392.197
S221		815.601	255.304	244.749	438.551	326.577
S222		1345.13	399.723	394.56	713.138	547.328
S223		1126.47	425.621	274.729	608.941	454.502
S224		852.426	801.527	282.294	645.416	315.501
S225		1229.86	758.85	545.219	844.643	350.29
S226		1147.55	395.605	499.31	680.82	407.508
S227		1818.4	907.781	505.053	1077.08	672.843
S228		781.09	658.359	274.716	571.388	264.153
S229		968.672	303.566	376.991	549.743	364.656
S232		882.657	450.289	423.473	585.473	257.718
S233		614.503	243.987	167.825	342.105	238.957
S234		1203.39	542.442	470.302	738.71	404.035
S235		878.376	292.874	217.351	462.867	361.817
S236		570.312	222.086	282.584	358.327	186.059
S238		1472.09	NA	415.736	943.913	746.956
S239		NA	NA	374.179	374.179	NA
S240		1643.41	581.647	531.766	918.941	627.905
S241		1090.72	324.751	144.716	520.062	502.334
S242		1766.19	NA	345.625	1055.91	1004.49
S243		1044.13	304.253	255.209	534.532	442.009
S244		845.761	414.423	218.291	492.825	320.998
S245		1911.51	806.766	614.849	1111.04	699.834
S246		1057.79	730.352	364.838	717.659	346.649
S247		1240	566.035	368.973	725.001	456.753
S248		688.367	436.224	361.155	495.249	171.406
S249		1125.74	NA	362.928	744.333	539.388
S250		1260.38	NA	449.804	855.09	573.16
S251		1808.97	539.931	337.179	895.361	797.68
S252		750.428	NA	285.759	518.093	328.571
S253		804.574	483.941	304.985	531.167	253.121
S254		1348.84	643.782	261.289	751.302	551.688
S255		1794.93	641.615	412.054	949.532	741.077
S256		2065.28	NA	545.315	1305.3	1074.77
S257		1033.8	NA	231.438	632.617	567.352
S258		NA	NA	251.038	251.038	NA
S259		NA	502.528	320.949	411.739	128.396
S260		NA	556.393	277.342	416.868	197.319
S261		NA	601.9	757.986	679.943	110.369
S262		NA	522.756	694.976	608.866	121.778
S264		NA	NA	336.458	336.458	NA
S265		NA	576.512	240.977	408.744	237.259
S266		NA	453.674	312.513	383.093	99.8159
S267		NA	646.748	592.719	619.734	38.2043
S268		NA	661.032	278.647	469.84	270.387
S269		NA	219.722	196.12	207.921	16.6891
S270		NA	364.963	420.897	392.93	39.5513
S271		NA	736.722	394.247	565.485	242.166
S272		NA	668.381	364.548	516.465	214.842
S273		NA	NA	215.079	215.079	NA
S274		795.388	483.381	215.444	498.071	290.251
S275		1169.02	851.751	294.934	771.901	442.479
S276		1639.9	1318.35	425.805	1128.02	629.028
S277		770.197	252.971	104.141	375.77	349.596
S278		1164.11	1167.63	379.046	903.594	454.276
S279		571.192	558.203	248.53	459.308	182.655
S280		895.514	NA	386.382	640.948	360.011
S281		758.005	553.149	362.787	557.98	197.653
S282		1562.63	698.374	333.974	864.992	631.046
S283		1276.61	711.217	305.222	764.351	487.871
S284		322.988	241.795	148.812	237.865	87.1545
S285		1073.71	412.982	162.733	549.809	470.651
S286		965.257	579.356	283.828	609.48	341.712
S287		1887.93	646.285	252.33	928.849	853.628
S288		NA	NA	338.482	338.482	NA
S290		NA	295.44	237.159	266.299	41.2109
S291		NA	453.696	272.545	363.12	128.093
S293		NA	691.483	327.517	509.5	257.363
S294		NA	572.889	358.901	465.895	151.312
S295		NA	496.494	329.636	413.065	117.986
S296		NA	409.273	505.477	457.375	68.0265
S297		NA	556.45	376.563	466.507	127.199
S298		NA	609.653	290.05	449.851	225.993
S300		NA	437.418	423.087	430.252	10.1335
S301		NA	405.822	292.656	349.239	80.0204
S302		NA	249.014	165.732	207.373	58.8893
S304		NA	862.581	351.022	606.802	361.727
S305		NA	184.669	321.252	252.961	96.5788
S306		NA	193.365	165.449	179.407	19.7396
S307		653.171	255.497	258.197	388.955	228.822
S309		1185.09	473.266	450.528	702.963	417.693
S310		1240.66	560.534	307.715	702.97	482.507
S311		2260.66	801.764	561.431	1207.95	919.556
S312		1398.79	476.283	821.731	898.933	466.071
S313		1728.01	1005.19	561.442	1098.22	588.822
S314		1131.51	560.538	392.681	694.91	387.31
S315		1317.93	957.824	459.424	911.725	431.104
S316		1885.69	935.503	663.155	1161.45	641.821
S317		920.78	620.914	404.083	648.592	259.458
S318		921.02	366.1	331.985	539.702	330.672
S319		1230.9	457.321	386.178	691.465	468.513
S320		978.403	420.531	427.073	608.669	320.216
S321		1840.74	607.014	482.837	976.864	750.712
S322		851.044	596.158	349.711	598.971	250.678
S323		1132.38	1038.13	388.049	852.852	405.28
S324		703.115	288.167	666.852	552.711	229.818
S325		529.296	200.724	235.854	321.958	180.417
S326		649.545	222.561	239.633	370.58	241.742
S327		639.155	448.34	227.41	438.302	206.056
S328		1056.36	482.238	383.53	640.708	363.33
S329		1045.6	208.616	132.389	462.2	506.67
S330		664.822	545.61	316.512	508.981	177.02
S331		1163.82	334.617	360.819	619.753	471.361
S332		1078.1	NA	264.05	671.073	575.617
S333		1044.61	NA	301.85	673.227	525.207
S334		1316.33	798.783	566.952	894.021	383.658
S335		1118.36	437.777	304.951	620.362	436.361
R268		355.026	415.266	NA	385.146	42.5961
S336		1316.46	387.664	553.083	752.404	495.443
S339		1156.36	439.566	242.538	612.821	480.917
S340		874.794	185.404	186.291	415.496	397.764
S342		1689.59	585.831	274.947	850.122	743.43
S343		1585.67	282.928	437.865	768.821	711.641
S345		707.06	862.895	399.49	656.482	235.806
S346		680.935	374.617	303.599	453.05	200.523
S347		2281.49	558.38	311.439	1050.44	1073.25
S348		1381.25	498.386	239.476	706.371	598.629
S349		958.579	312.502	449.909	573.663	340.353
S367		1716.22	915.845	411.733	1014.6	657.827
S350		862.233	525.939	263.157	550.443	300.289
S361		NA	NA	418.846	418.846	NA
R269		NA	NA	NA	NA	NA
S365		NA	NA	112.779	112.779	NA
S366		NA	NA	209.829	209.829	NA
S369		1523.8	NA	191.404	857.601	942.145
S352		1804.92	NA	373.968	1089.44	1011.84
S368		1388.04	393.64	363.578	715.086	582.99
S1	TSA	292.685	161.659	94.668	183.004	100.719
S2		254.076	89.635	76.737	140.149	98.8739
S3		287.23	141.663	141.158	190.017	84.1893
S4		167.256	116.336	105.435	129.676	32.9988
S5		236.828	178.228	78.704	164.587	79.9398
S6		220.97	179.331	78.249	159.517	73.3947
S7		687.506	194.477	86.302	322.762	320.475
S8		120.762	98.473	88.009	102.415	16.7285
S9		291.223	136.093	106.842	178.053	99.0936
S10		327.495	NA	139.373	233.434	133.022
S11		260.799	150.463	139.02	183.427	67.2497
S12		285.754	201.686	141.172	209.537	72.6101
S13		184.972	147.031	87.439	139.814	49.1654
S14		224.353	146.98	117.728	163.02	55.0926
S15		132.983	168.895	115.809	139.229	27.0886
S16		183.308	112.888	70.696	122.297	56.8926
S17		267.727	NA	88.664	178.195	126.617
S18		199.934	126.105	112.682	146.24	46.9819
S19		179.922	81.946	124.002	128.623	49.1512
S20		159.677	105.576	74.342	113.198	43.1751
S21		185.16	144.468	94.272	141.3	45.5267
S22		209.851	118.454	141.753	156.686	47.4931
S23		220.126	107.265	106.617	144.669	65.3482
S24		243.128	140.008	85.469	156.202	80.0673
S25		201.623	160.157	104.903	155.561	48.5235
S26		159.936	86.22	77.178	107.778	45.3958
S27		257.903	143.178	93.005	164.695	84.5286
S28		243.83	92.878	96.253	144.32	86.1944
S29		243.824	107.611	84.694	145.376	86.0247
S30		240.312	181.998	75.97	166.093	83.3174
S31		186.569	165.403	129.636	160.536	28.7769
S32		299.699	157.661	147.781	201.714	85.0015
S33		247.653	111.464	156.055	171.724	69.4334
S34		303.23	142.466	221.613	222.436	80.3852
S35		279.185	145.465	127.762	184.137	82.7882
S36		287.773	110.219	124.478	174.157	98.6526
S37		309.557	143.802	154.018	202.459	92.8901
S38		232.714	130.12	114.217	159.017	64.3169
S39		236.17	NA	124.439	180.304	79.0057
S40		149.405	160.531	108.303	139.413	27.5104
S41		184.462	NA	120.048	152.255	45.5476
S42		220.898	104.11	104.197	143.068	67.4025
S43		213.205	117.217	105.632	145.351	59.0478
S44		170.162	107.073	109.105	128.78	35.8523
S45		284.918	121.978	115.7	174.199	95.9371
S46		286.85	175.679	199.123	220.551	58.6012
S47		301.662	167.801	163.187	210.883	78.6505
S48		281.379	143.178	146.223	190.26	78.9261
S49		207.67	103.507	119.832	143.67	56.0237
S50		248.238	158.002	101.825	169.355	73.8638
S51		244.774	NA	104.554	174.664	99.1505
S52		223.803	135.257	95.184	151.415	65.8142
S53		282.231	151.285	160.184	197.9	73.1682
S54		347.728	NA	91.191	219.459	181.399
S55		178.735	111.998	127.521	139.418	34.9229
S56		217.021	161.998	126.428	168.482	45.6433
S57		206.388	83.205	97.245	128.946	67.4331
S58		145.084	88.513	119.104	117.567	28.3168
S59		131.436	99.391	95.497	108.775	19.7216
S60		307.659	149.91	118.141	191.903	101.498
S61		163.456	99.783	83.438	115.559	42.2774
S62		272.006	140.882	122.312	178.4	81.5952
S63		161.786	116.872	123.151	133.936	24.322
S64		252.136	134.485	113.899	166.84	74.5822
S66		246.953	152.214	115.343	171.503	67.8922
S67		233.45	NA	111.261	172.356	86.4007
S68		125.258	NA	88.017	106.637	26.3334
S69		195.06	NA	120.617	157.839	52.6392
S70		151.49	119.265	131.124	133.96	16.2986
S71		248.658	121.28	88.286	152.741	84.6886
S72		176.666	106.822	89.622	124.37	46.099
S73		275.582	192.291	144.728	204.2	66.2349
S74		171.805	101.499	72.656	115.32	50.999
S75		161.649	130.223	112.493	134.788	24.894
S76		133.197	105.372	138.852	125.807	17.9217
S77		117.036	97.318	85.165	99.8397	16.0844
S78		112.05	97.551	107.933	105.845	7.47169
S79		188.702	152.246	123.978	154.975	32.4482
S80		148.508	95.956	95.855	113.44	30.3701
S81		277.497	133.3	166.184	192.327	75.5697
S82		292.749	119.443	119.548	177.247	100.028
S83		155.132	115.418	73.753	114.768	40.6934
S84		357.038	97.959	103.788	186.262	147.925
S85		290.279	241.425	142.349	224.684	75.3725
S86		124.367	77.95	86.193	96.17	24.7647
S87		257.642	132.145	98.997	162.928	83.6825
S88		219.537	147.544	108.872	158.651	56.1624
S89		116.547	58.912	73.703	83.054	29.9337
S90		85.63	88.587	85.4	86.539	1.77734
S91		178.639	131.894	110.241	140.258	34.9577
S92		186.247	101.017	109.19	132.151	47.0261
S93		NA	145.08	73.634	109.357	50.52
S94		206.705	138.649	102.368	149.241	52.9688
S95		218.663	137.972	NA	178.317	57.0572
S96		234.059	144.602	133.858	170.84	55.0125
S97		171.14	140.709	115.154	142.334	28.0284
S98		256.994	181.888	177.789	205.557	44.5929
S99		258.349	131.455	136.879	175.561	71.7478
S101		242.003	107.091	123.333	157.476	73.6519
S102		246.614	195.962	139.042	193.873	53.8164
S103		299.569	145.265	101.877	182.237	103.902
S104		289.84	131.387	118.108	179.778	95.5472
S105		168.574	110.593	76.196	118.454	46.6881
S106		197.303	171.633	140.703	169.88	28.3407
S108		190.95	123.696	110.751	141.799	43.0553
S109		212.906	130.071	123.262	155.413	49.9067
S110		140.402	99.493	160.461	133.452	31.0725
S111		206.499	139.57	101.559	149.209	53.1299
S112		266.999	167.779	133.592	189.457	69.295
S113		164.818	172.643	128.949	155.47	23.2987
S114		96.654	100.817	91.819	96.43	4.50318
S115		230.633	128.437	104.489	154.52	66.9948
S116		255.209	178.426	140.135	191.257	58.6001
S117		245.778	107.925	116.634	156.779	77.1983
S118		230.876	150.852	131.657	171.128	52.6256
S119		228.493	95.25	118.004	147.249	71.2733
S121		268.412	155.009	92.676	172.032	89.0962
S122		213.434	126.564	122.569	154.189	51.3465
S124		172.914	110.8	115.708	133.141	34.532
S125		168.108	119.391	140.986	142.828	24.4107
S126		174.313	131.042	142.122	149.159	22.4774
S127		192.576	164.417	130.145	162.379	31.2653
S128		194.09	132.49	95.939	140.84	49.6054
S129		251.573	134.803	128.577	171.651	69.2845
S130		234.409	151.96	120.285	168.885	58.9144
S131		258.526	164.124	167.157	196.602	53.6489
S132		221.385	176.068	109.996	169.15	56.0158
S133		182.706	100.714	143.332	142.251	41.0067
S134		247.025	145.046	143.816	178.629	59.2359
S135		222.235	122.703	114.569	153.169	59.951
S136		212.977	144.084	125.948	161.003	45.9152
S137		218.536	161.567	102.59	160.898	57.9759
S138		185.35	96.647	125.652	135.883	45.2279
S139		269.693	126.513	119.544	171.917	84.7485
S140		197.48	123.735	96.631	139.282	52.1911
S141		196.051	157.733	103.228	152.337	46.6461
S142		167.588	124.166	96.232	129.329	35.9571
S143		178.921	138.594	131.99	149.835	25.4047
S144		143.031	93.703	124.392	120.375	24.9081
S145		155.163	93.168	270.029	172.787	89.7379
S146		238.917	138.783	105.478	161.059	69.4526
S147		228.501	132.347	157.48	172.776	49.8686
S148		233.866	124.458	120.9	159.741	64.2185
S149		168.97	126.045	82.407	125.807	43.282
S150		291.181	137.419	122.079	183.56	93.5179
S151		205.036	141.435	102.27	149.58	51.8649
S152		216.382	127.654	105.814	149.95	58.559
S153		172.898	111.896	100.234	128.343	39.0241
S154		181.125	147.592	110.798	146.505	35.1761
S155		253.955	115.241	139.416	169.537	74.1004
S157		265.847	147.513	142.545	185.302	69.7985
S158		217.819	183.547	149.97	183.779	33.9251
S159		133.968	100.117	93.126	109.07	21.8435
S160		155.597	NA	135.152	145.375	14.4568
S161		245.443	148.583	119.922	171.316	65.7759
S164		242.855	156.213	90.808	163.292	76.2703
S165		168.922	167.718	135.386	157.342	19.024
S166		248.973	112.855	106.956	156.261	80.3448
S167		299.823	157.633	106.869	188.108	100.022
S168		169.253	125.19	132.201	142.215	23.6768
S169		275.84	130.195	89.455	165.163	97.9894
S170		236.744	134.018	103.889	158.217	69.6549
S171		244.189	135.607	135.353	171.716	62.7633
S172		352.14	179.09	130.405	220.545	116.535
S173		203.094	167.262	93.044	154.467	56.1297
S174		183.864	130.615	99.285	137.921	42.7602
S175		324.901	151.964	103.711	193.525	116.305
S176		214.325	133.662	78.943	142.31	68.1041
S177		335.06	146.574	128.673	203.436	114.341
S178		315.129	144.121	62.838	174.029	128.777
S179		179.597	89.99	144.75	138.112	45.1708
S180		176.141	138.461	86.666	133.756	44.9227
S181		335.24	179.689	79.633	198.187	128.804
S182		250.312	169.673	135.921	185.302	58.7752
S183		230.007	158.758	125.848	171.538	53.2425
S184		345.109	186.249	180.216	237.191	93.5081
S185		226.543	149.622	132.523	169.563	50.0816
S186		282.428	NA	153.473	217.951	91.185
S187		230.331	133.094	104.835	156.087	65.8317
S188		321.487	223.859	134.901	226.749	93.3266
S189		268.582	91.802	81.213	147.199	105.254
S190		306.755	189.253	110.031	202.013	98.9808
S191		231.058	202.044	83.801	172.301	78.0041
S192		336.572	196.744	211.416	248.244	76.8453
S193		180.542	125.586	81.93	129.353	49.4138
S194		186.708	142.45	119.657	149.605	34.0933
S195		231.415	193.338	173.433	199.395	29.4618
S196		335.223	147.961	135.826	206.337	111.784
S197		181.859	119.403	106.274	135.845	40.3861
S198		223.366	132.063	147.724	167.718	48.8249
S199		277.086	197.653	109.665	194.801	83.7469
S200		131.85	73.458	96.25	100.519	29.4292
S201		215.295	96.418	93.91	135.208	69.369
S202		224.225	157.35	133.505	171.693	47.0301
S203		246.47	181.109	126.383	184.654	60.1219
S204		188.434	171.216	82.765	147.472	56.6951
S205		320.891	153.585	154.912	209.796	96.2134
S206		NA	NA	101.714	101.714	NA
S207		235.364	193.909	99.549	176.274	69.6037
S208		155.19	126.971	90.253	124.138	32.5611
S209		235.227	202.642	148.244	195.371	43.945
S210		221.453	133.472	114.724	156.55	56.9842
S211		255.048	191.589	155.584	200.74	50.3595
S212		146.396	130.745	121.534	132.892	12.5692
S213		160.437	134.207	105.36	133.335	27.5489
S214		161.427	114.847	104.717	126.997	30.2444
S215		225.636	171.424	133.089	176.716	46.4999
S216		129.064	99.884	116.799	115.249	14.6516
S217		206.893	135.437	140.659	160.996	39.8333
S218		234.716	175.275	128.196	179.396	53.3794
S219		149.932	150.09	114.265	138.096	20.6381
S220		139.616	115.693	93.217	116.175	23.2033
S221		163.135	91.101	97.51	117.249	39.8677
S222		205.802	149.58	166.056	173.813	28.9025
S223		210.701	126.754	105.067	147.507	55.7912
S224		141.242	158.478	92.324	130.681	34.3181
S225		180.348	156.013	156.833	164.398	13.8192
S226		170.397	138.019	166.838	158.418	17.7555
S227		266.959	240.266	157.625	221.617	57.0029
S228		141.572	163.727	117.642	140.98	23.0482
S229		169.774	116.083	150.585	145.481	27.207
S232		171.183	133.275	146.657	150.372	19.2251
S233		142.755	91.26	96.002	110.006	28.4607
S234		197.851	139.916	119.846	152.538	40.5052
S235		188.387	120.495	103.652	137.511	44.8572
S236		134.395	98.845	101.913	111.718	19.699
S238		257.053	NA	128.453	192.753	90.9339
S239		NA	NA	108.049	108.049	NA
S240		316.267	158.259	150.488	208.338	93.55
S241		168.714	103.025	75.119	115.619	48.0517
S242		284.416	NA	111.205	197.81	122.479
S243		167.808	102.165	111.287	127.087	35.5594
S244		181.76	132.78	95.897	136.812	43.0733
S245		299.365	204.462	144.184	216.004	78.2317
S246		178.806	161.001	115.825	151.877	32.4666
S247		216.686	142.004	101.853	153.514	58.2754
S248		166.949	119.236	100.19	128.792	34.39
S249		209.793	NA	112.595	161.194	68.7294
S250		215.498	NA	145.601	180.549	49.4246
S251		275.25	138.644	112.565	175.486	87.3763
S252		163.835	NA	124.869	144.352	27.5531
S253		155.276	112.584	99.91	122.59	29.0076
S254		255.135	141.661	92.47	163.089	83.4226
S255		276.435	162.744	128.395	189.191	77.4826
S256		298.317	NA	164.656	231.487	94.5126
S257		192.719	NA	100.323	146.521	65.3338
S258		NA	NA	84.152	84.152	NA
S259		NA	149.288	101.802	125.545	33.5777
S260		NA	125.25	106.424	115.837	13.312
S261		NA	136.249	135.788	136.019	0.325976
S262		NA	145.134	162.433	153.784	12.2322
S264		NA	NA	115.714	115.714	NA
S265		NA	133.882	97.754	115.818	25.5464
S266		NA	126.455	118.502	122.478	5.62362
S267		NA	169.5	150.963	160.231	13.1076
S268		NA	171.964	141.357	156.661	21.6424
S269		NA	111.97	110.836	111.403	0.801859
S270		NA	127.728	122.474	125.101	3.71514
S271		NA	181.864	129.427	155.645	37.0786
S272		NA	158.888	127.194	143.041	22.411
S273		NA	NA	82.119	82.119	NA
S274		200.499	145.398	129.352	158.416	37.3173
S275		197.997	162.59	113.898	158.162	42.224
S276		241.007	225.416	113.409	193.277	69.6059
S277		182.247	101.264	62.28	115.264	61.1965
S278		162.76	201.227	120.357	161.448	40.451
S279		122.936	126.795	122.884	124.205	2.24316
S280		164.26	NA	163.963	164.111	0.210011
S281		147.642	134.502	113.455	131.866	17.2452
S282		273.694	201.68	131.584	202.319	71.0572
S283		194.141	160.33	138.627	164.366	27.9762
S284		90.955	76.148	81.275	82.7927	7.51926
S285		168.066	126.041	68.538	120.882	49.9642
S286		240.16	161.544	132.492	178.065	55.7029
S287		292.212	153.468	143.009	196.23	83.2875
S288		NA	NA	106.514	106.514	NA
S290		NA	119.16	92.942	106.051	18.5389
S291		NA	123.891	111.423	117.657	8.81621
S293		NA	151.505	95.384	123.445	39.6835
S294		NA	161.251	137.544	149.398	16.7634
S295		NA	135.749	127.883	131.816	5.5621
S296		NA	121.183	124.369	122.776	2.25284
S297		NA	136.225	127.097	131.661	6.45447
S298		NA	141.46	100.891	121.175	28.6866
S300		NA	125.522	164.57	145.046	27.6111
S301		NA	123.64	111.214	117.427	8.78651
S302		NA	95.402	112.048	103.725	11.7705
S304		NA	192.515	114.569	153.542	55.1161
S305		NA	102.181	133.654	117.917	22.2548
S306		NA	104.005	105.55	104.778	1.09248
S307		167.695	91.21	111.346	123.417	39.6456
S309		197.317	145.253	148.297	163.622	29.2201
S310		201.675	136.218	110.34	149.411	47.0751
S311		326.884	194.156	162.094	227.711	87.3694
S312		254.64	140.967	165.944	187.184	59.7389
S313		283.862	183.331	139.716	202.303	73.9221
S314		199.958	134.082	108.408	147.483	47.2232
S315		229.92	181.062	118.553	176.512	55.8228
S316		309.335	207.266	161.681	226.094	75.6062
S317		168.11	130.342	148.385	148.946	18.8902
S318		161.194	110.4	101.534	124.376	32.192
S319		199.777	146.358	118.236	154.79	41.4193
S320		171.526	129.049	144.459	148.345	21.5034
S321		273.54	165.004	154.671	197.738	65.8492
S322		159.445	144.251	105.301	136.332	27.9271
S323		207.207	223.252	127.953	186.137	51.0237
S324		161.596	120.553	147.594	143.248	20.8638
S325		117.938	85.645	101.2	101.594	16.1501
[truncated: 2,058 more rows]

## Sheet: Table S6
Table S6. Summary of SNP and linkage disequilibrium (LD) decay on the 19 chromosomes of B. napus
Chromosome	Number of SNPs	Marker density (kb/SNP)	LD decay to half (Mb)	LD decay to 0.1 (Mb)
A1	770	30.2	0.10-0.15	2.35-2.4
A2	702	35.3	0.05-0.10	1.75-1.8
A3	1103	27	0.10-0.15	1.55-1.6
A4	701	27.3	0.10-0.15	2.45-2.5
A5	789	29.2	0.10-0.15	1.8-1.85
A6	848	28.8	0.10-0.15	3.7-3.75
A7	899	26.7	0.05-0.10	1.25-1.3
A8	599	31.7	0.10-0.15	5.85-5.9
A9	1024	33.1	0.20-0.25	2-2.05
A10	615	28.3	0.20-0.25	4.7-4.75
A-subgenome	8050	29.6	0.10-0.15	2.6-2.65
C1	1421	27.3	3.70-3.75	7.85-7.9
C2	1444	32	0.75-0.80	8.05-8.1
C3	2026	29.9	0.10-0.15	2.7-2.75
C4	1933	25.3	0.85-0.90	4.85-4.9
C5	911	47.4	0.10-0.15	1.8-1.85
C6	1023	36.4	0.15-0.20	1.55-1.6
C7	1212	36.9	0.25-0.30	2.6-2.65
C8	1161	33.1	0.30-0.35	2.7-2.75
C9	950	51.1	0.20-0.25	2.9-2.95
C-subgenome	12081	33.7	0.45-0.50	6.2-6.25
A + C	20131	32.1	0.25-0.30	5.75-5.8

## Sheet: Table S7
Table S7: GO enrichment results of the candidate genes
Term_ID	Term_description	ListHit	ListTotal	PopHit	PopTotal	GeneRatio	BgRatio	Enrichment_score	Gene IDs	p-value	FDR_bh	Category
GO:0008831	dTDP-4-dehydrorhamnose reductase activity	1	19	5	51099	0.0526316	9.78493e-05	537.884	BnaA09G0152200ZS	0.00185783	0.0173862	molecular_function
GO:0008830	dTDP-4-dehydrorhamnose 3,5-epimerase activity	1	19	5	51099	0.0526316	9.78493e-05	537.884	BnaA09G0152200ZS	0.00185783	0.0173862	molecular_function
GO:0050577	GDP-L-fucose synthase activity	1	19	6	51099	0.0526316	0.000117419	448.237	BnaC08G0242400ZS	0.002229	0.0173862	molecular_function
GO:0052731	phosphocholine phosphatase activity	1	19	6	51099	0.0526316	0.000117419	448.237	BnaC08G0241500ZS	0.002229	0.0173862	molecular_function
GO:0052732	phosphoethanolamine phosphatase activity	1	19	6	51099	0.0526316	0.000117419	448.237	BnaC08G0241500ZS	0.002229	0.0173862	molecular_function
GO:0010490	UDP-4-keto-rhamnose-4-keto-reductase activity	1	19	10	51099	0.0526316	0.000195699	268.942	BnaA09G0152200ZS	0.00371238	0.0202553	molecular_function
GO:0010489	UDP-4-keto-6-deoxy-glucose-3,5-epimerase activity	1	19	10	51099	0.0526316	0.000195699	268.942	BnaA09G0152200ZS	0.00371238	0.0202553	molecular_function
GO:0004105	choline-phosphate cytidylyltransferase activity	1	19	13	51099	0.0526316	0.000254408	206.879	BnaA05G0115800ZS	0.00482355	0.0202553	molecular_function
GO:0004781	sulfate adenylyltransferase (ATP) activity	1	19	13	51099	0.0526316	0.000254408	206.879	BnaA05G0332300ZS	0.00482355	0.0202553	molecular_function
GO:0019305	dTDP-rhamnose biosynthetic process	1	22	12	51854	0.0454545	0.000231419	196.417	BnaA09G0152200ZS	0.00507989	0.0521819	biological_process
GO:0070001	aspartic-type peptidase activity	1	19	14	51099	0.0526316	0.000273978	192.102	BnaA05G0374500ZS	0.00519368	0.0202553	molecular_function
GO:0001887	selenium compound metabolic process	1	22	14	51854	0.0454545	0.000269989	168.357	BnaA05G0332300ZS	0.00592414	0.0521819	biological_process
GO:0006527	arginine catabolic process	1	22	14	51854	0.0454545	0.000269989	168.357	BnaC03G0295100ZS	0.00592414	0.0521819	biological_process
GO:0005618	cell wall	4	22	1986	56777	0.181818	0.034979	5.19793	BnaC09G0446000ZS;BnaC08G0262600ZS;BnaC04G0584100ZS;BnaC03G0295200ZS	0.00659285	0.12924	cellular_component
GO:0030527	structural constituent of chromatin	1	19	18	51099	0.0526316	0.000352257	149.412	BnaC08G0261600ZS	0.00667289	0.0236584	molecular_function
GO:0042351	'de novo' GDP-L-fucose biosynthetic process	1	22	18	51854	0.0454545	0.000347128	130.944	BnaC08G0242400ZS	0.00761059	0.0521819	biological_process
GO:0010253	UDP-rhamnose biosynthetic process	1	22	19	51854	0.0454545	0.000366413	124.053	BnaA09G0152200ZS	0.00803178	0.0521819	biological_process
GO:0000050	urea cycle	1	22	19	51854	0.0454545	0.000366413	124.053	BnaC03G0295100ZS	0.00803178	0.0521819	biological_process
GO:0051262	protein tetramerization	1	22	19	51854	0.0454545	0.000366413	124.053	BnaC08G0241500ZS	0.00803178	0.0521819	biological_process
GO:0004617	phosphoglycerate dehydrogenase activity	1	19	22	51099	0.0526316	0.000430537	122.246	BnaC08G0241700ZS	0.00815001	0.0246158	molecular_function
GO:0031210	phosphatidylcholine binding	1	19	23	51099	0.0526316	0.000450107	116.931	BnaA05G0115800ZS	0.00851897	0.0246158	molecular_function
GO:0002188	translation reinitiation	1	22	21	51854	0.0454545	0.000404983	112.238	BnaC09G0293200ZS	0.00887364	0.0521819	biological_process
GO:0005337	nucleoside transmembrane transporter activity	1	19	25	51099	0.0526316	0.000489246	107.577	BnaA02G0187300ZS	0.00925649	0.0246158	molecular_function
GO:0006333	chromatin assembly or disassembly	1	22	22	51854	0.0454545	0.000424268	107.136	BnaC08G0261600ZS	0.00929431	0.0521819	biological_process
GO:0004407	histone deacetylase activity	1	19	27	51099	0.0526316	0.000528386	99.6082	BnaC09G0446000ZS	0.00999349	0.0246158	molecular_function
GO:0004020	adenylylsulfate kinase activity	1	19	28	51099	0.0526316	0.000547956	96.0508	BnaA05G0332300ZS	0.0103618	0.0246158	molecular_function
GO:0016853	isomerase activity	1	19	29	51099	0.0526316	0.000567526	92.7387	BnaC08G0242400ZS	0.01073	0.0246158	molecular_function
GO:0071540	eukaryotic translation initiation factor 3 complex, eIF3e	1	22	29	56777	0.0454545	0.00051077	88.9922	BnaC09G0293200ZS	0.0111789	0.12924	cellular_component
GO:0043614	multi-eIF complex	1	22	30	56777	0.0454545	0.000528383	86.0258	BnaC09G0293200ZS	0.0115623	0.12924	cellular_component
GO:1902289	negative regulation of defense response to oomycetes	1	22	28	51854	0.0454545	0.000539978	84.1786	BnaA02G0186600ZS	0.0118148	0.0521819	biological_process
GO:0070814	hydrogen sulfide biosynthetic process	1	22	28	51854	0.0454545	0.000539978	84.1786	BnaA05G0332300ZS	0.0118148	0.0521819	biological_process
GO:0006564	L-serine biosynthetic process	1	22	28	51854	0.0454545	0.000539978	84.1786	BnaC08G0241700ZS	0.0118148	0.0521819	biological_process
GO:0071541	eukaryotic translation initiation factor 3 complex, eIF3m	1	22	32	56777	0.0454545	0.000563609	80.6491	BnaC09G0293200ZS	0.0123286	0.12924	cellular_component
GO:0007052	mitotic spindle organization	1	22	35	51854	0.0454545	0.000674972	67.3429	BnaC03G0295300ZS	0.0147476	0.0580164	biological_process
GO:0006656	phosphatidylcholine biosynthetic process	1	22	37	51854	0.0454545	0.000713542	63.7027	BnaA05G0115800ZS	0.015584	0.0580164	biological_process
GO:0010623	programmed cell death involved in cell development	1	22	39	51854	0.0454545	0.000752112	60.4359	BnaC08G0262600ZS	0.0164197	0.0580164	biological_process
GO:0005615	extracellular space	2	22	513	56777	0.0909091	0.00903535	10.0615	BnaC08G0262600ZS;BnaC03G0295200ZS	0.0167016	0.12924	cellular_component
GO:0010116	positive regulation of abscisic acid biosynthetic process	1	22	42	51854	0.0454545	0.000809966	56.119	BnaC08G0241200ZS	0.0176721	0.0585388	biological_process
GO:0000103	sulfate assimilation	1	22	47	51854	0.0454545	0.000906391	50.1489	BnaA05G0332300ZS	0.0197559	0.061592	biological_process
GO:0045271	respiratory chain complex I	1	22	54	56777	0.0454545	0.000951089	47.7921	BnaA05G0375000ZS	0.0207201	0.12924	cellular_component
GO:1900425	negative regulation of defense response to bacterium	1	22	50	51854	0.0454545	0.000964246	47.14	BnaA02G0186600ZS	0.0210042	0.0618457	biological_process
GO:0004427	inorganic diphosphatase activity	1	19	60	51099	0.0526316	0.00117419	44.8237	BnaC08G0241500ZS	0.0220793	0.0478384	molecular_function
GO:0005852	eukaryotic translation initiation factor 3 complex	1	22	61	56777	0.0454545	0.00107438	42.3077	BnaC09G0293200ZS	0.0233759	0.12924	cellular_component
GO:0010162	seed dormancy process	1	22	72	51854	0.0454545	0.00138851	32.7361	BnaC09G0446000ZS	0.030112	0.080473	biological_process
GO:0016282	eukaryotic 43S preinitiation complex	1	22	80	56777	0.0454545	0.00140902	32.2597	BnaC09G0293200ZS	0.0305497	0.12924	cellular_component
GO:0030134	COPII-coated ER to Golgi transport vesicle	1	22	81	56777	0.0454545	0.00142663	31.8614	BnaA05G0332800ZS	0.0309259	0.12924	cellular_component
GO:0045037	protein import into chloroplast stroma	1	22	79	51854	0.0454545	0.00152351	29.8354	BnaC09G0446100ZS	0.032993	0.080473	biological_process
GO:0001732	formation of cytoplasmic translation initiation complex	1	22	80	51854	0.0454545	0.00154279	29.4625	BnaC09G0293200ZS	0.0334039	0.080473	biological_process
GO:0009294	DNA mediated transformation	1	22	80	51854	0.0454545	0.00154279	29.4625	BnaC09G0446000ZS	0.0334039	0.080473	biological_process
GO:0000159	protein phosphatase type 2A complex	1	22	92	56777	0.0454545	0.00162037	28.0519	BnaC03G0295300ZS	0.0350546	0.12924	cellular_component
GO:1902074	response to salt	1	22	85	51854	0.0454545	0.00163922	27.7294	BnaC08G0241200ZS	0.0354559	0.0817027	biological_process
GO:0005793	endoplasmic reticulum-Golgi intermediate compartment	1	22	96	56777	0.0454545	0.00169083	26.883	BnaA05G0332800ZS	0.0365518	0.12924	cellular_component
GO:0033290	eukaryotic 48S preinitiation complex	1	22	97	56777	0.0454545	0.00170844	26.6059	BnaC09G0293200ZS	0.0369257	0.12924	cellular_component
GO:0016616	oxidoreductase activity, acting on the CH-OH group of donors, NAD or NADP as acceptor	1	19	105	51099	0.0526316	0.00205483	25.6135	BnaA09G0152200ZS	0.0383348	0.0786872	molecular_function
GO:0050662	coenzyme binding	1	19	117	51099	0.0526316	0.00228967	22.9865	BnaC08G0242400ZS	0.0426262	0.0831211	molecular_function
GO:0005774	vacuolar membrane	3	22	2038	56777	0.136364	0.0358948	3.79898	BnaA02G0187300ZS;BnaC09G0446000ZS;BnaC08G0262500ZS	0.0427578	0.138141	cellular_component
GO:0009944	polarity specification of adaxial/abaxial axis	1	22	111	51854	0.0454545	0.00214063	21.2342	BnaC09G0446000ZS	0.0460593	0.101714	biological_process
GO:0005764	lysosome	1	22	125	56777	0.0454545	0.0022016	20.6462	BnaC08G0262600ZS	0.0473403	0.142021	cellular_component
GO:0009741	response to brassinosteroid	1	22	119	51854	0.0454545	0.0022949	19.8067	BnaC03G0295200ZS	0.0492995	0.104515	biological_process
GO:0032580	Golgi cisterna membrane	1	22	145	56777	0.0454545	0.00255385	17.7984	BnaA05G0332800ZS	0.0547133	0.153197	cellular_component
GO:0006413	translational initiation	1	22	137	51854	0.0454545	0.00264203	17.2044	BnaC09G0293200ZS	0.0565515	0.111008	biological_process
GO:1900150	regulation of defense response to fungus	1	22	137	51854	0.0454545	0.00264203	17.2044	BnaA02G0186600ZS	0.0565515	0.111008	biological_process
GO:0005351	carbohydrate:proton symporter activity	1	19	169	51099	0.0526316	0.00330731	15.9137	BnaC08G0262500ZS	0.0610134	0.105832	molecular_function
GO:0008565	protein transporter activity	1	19	170	51099	0.0526316	0.00332688	15.8201	BnaC09G0446100ZS	0.0613637	0.105832	molecular_function
GO:0005355	glucose transmembrane transporter activity	1	19	173	51099	0.0526316	0.00338558	15.5458	BnaC08G0262500ZS	0.0624138	0.105832	molecular_function
GO:0031966	mitochondrial membrane	1	22	168	56777	0.0454545	0.00295894	15.3617	BnaA05G0375000ZS	0.063125	0.16404	cellular_component
GO:0007030	Golgi organization	1	22	156	51854	0.0454545	0.00300845	15.109	BnaA05G0332800ZS	0.064149	0.121425	biological_process
GO:0005747	mitochondrial respiratory chain complex I	1	22	177	56777	0.0454545	0.00311746	14.5806	BnaA05G0375000ZS	0.066397	0.16404	cellular_component
GO:0003755	peptidyl-prolyl cis-trans isomerase activity	1	19	188	51099	0.0526316	0.00367913	14.3054	BnaC03G0295300ZS	0.0676479	0.109928	molecular_function
GO:0008645	hexose transmembrane transport	1	22	169	51854	0.0454545	0.00325915	13.9467	BnaC08G0262500ZS	0.0693137	0.125951	biological_process
GO:0009853	photorespiration	1	22	174	51854	0.0454545	0.00335558	13.546	BnaA05G0375000ZS	0.0712928	0.125951	biological_process
GO:0005829	cytosol	6	22	7920	56777	0.272727	0.139493	1.95513	BnaA09G0152200ZS;BnaC08G0261600ZS;BnaC08G0241700ZS;BnaC09G0446000ZS;BnaC09G0293200ZS;BnaC08G0241200ZS	0.0754168	0.175973	cellular_component
GO:0050897	cobalt ion binding	1	19	211	51099	0.0526316	0.00412924	12.7461	BnaC03G0295100ZS	0.0756198	0.117967	molecular_function
GO:0009627	systemic acquired resistance	1	22	199	51854	0.0454545	0.0038377	11.8442	BnaA05G0374500ZS	0.0811285	0.138703	biological_process
GO:0000785	chromatin	1	22	218	56777	0.0454545	0.00383958	11.8384	BnaC08G0261600ZS	0.0811653	0.179418	cellular_component
GO:0009644	response to high light intensity	1	22	214	51854	0.0454545	0.00412697	11.014	BnaC04G0582000ZS	0.086982	0.144064	biological_process
GO:0003729	mRNA binding	2	19	1362	51099	0.105263	0.0266541	3.94922	BnaC04G0584100ZS;BnaC09G0293200ZS	0.0900472	0.135071	molecular_function
GO:0051287	NAD binding	1	19	264	51099	0.0526316	0.00516644	10.1872	BnaC08G0241700ZS	0.0937447	0.135409	molecular_function
GO:0042742	defense response to bacterium	2	22	1233	51854	0.0909091	0.0237783	3.8232	BnaC03G0295100ZS;BnaC08G0262600ZS	0.0954455	0.146519	biological_process
GO:0051603	proteolysis involved in cellular protein catabolic process	1	22	236	51854	0.0454545	0.00455124	9.98729	BnaC08G0262600ZS	0.0955029	0.146519	biological_process
GO:0009414	response to water deprivation	2	22	1243	51854	0.0909091	0.0239711	3.79244	BnaA05G0374500ZS;BnaC04G0582000ZS	0.0967576	0.146519	biological_process
GO:0009706	chloroplast inner membrane	1	22	266	56777	0.0454545	0.004685	9.70215	BnaC09G0446100ZS	0.0981718	0.199376	cellular_component
GO:0005783	endoplasmic reticulum	3	22	2902	56777	0.136364	0.0511122	2.66792	BnaA02G0186600ZS;BnaA05G0374500ZS;BnaA05G0332800ZS	0.0996878	0.199376	cellular_component
GO:0004197	cysteine-type endopeptidase activity	1	19	309	51099	0.0526316	0.00604709	8.70363	BnaC08G0262600ZS	0.108869	0.145856	molecular_function
GO:0003743	translation initiation factor activity	1	19	315	51099	0.0526316	0.0061645	8.53784	BnaC09G0293200ZS	0.110867	0.145856	molecular_function
GO:0022857	transmembrane transporter activity	1	19	319	51099	0.0526316	0.00624278	8.43079	BnaA02G0186600ZS	0.112197	0.145856	molecular_function
GO:0003682	chromatin binding	1	19	339	51099	0.0526316	0.00663418	7.9334	BnaC08G0261600ZS	0.118819	0.147621	molecular_function
GO:0004252	serine-type endopeptidase activity	1	19	346	51099	0.0526316	0.00677117	7.77289	BnaA09G0535400ZS	0.121125	0.147621	molecular_function
GO:0005886	plasma membrane	6	22	9052	56777	0.272727	0.159431	1.71063	BnaA05G0332300ZS;BnaA09G0152200ZS;BnaC09G0293200ZS;BnaC08G0262600ZS;BnaC08G0241200ZS;BnaA02G0186600ZS	0.125322	0.239251	cellular_component
GO:0022627	cytosolic small ribosomal subunit	1	22	377	56777	0.0454545	0.00664001	6.84555	BnaC04G0584100ZS	0.136356	0.248998	cellular_component
GO:0055114	oxidation-reduction process	1	22	357	51854	0.0454545	0.00688471	6.60224	BnaA05G0375000ZS	0.141028	0.196631	biological_process
GO:0009624	response to nematode	1	22	364	51854	0.0454545	0.00701971	6.47527	BnaC08G0262500ZS	0.143593	0.196631	biological_process
GO:0006888	ER to Golgi vesicle-mediated transport	1	22	365	51854	0.0454545	0.00703899	6.45753	BnaA05G0332800ZS	0.143959	0.196631	biological_process
GO:0030163	protein catabolic process	1	22	367	51854	0.0454545	0.00707756	6.42234	BnaA05G0374500ZS	0.14469	0.196631	biological_process
GO:0009506	plasmodesma	3	22	3446	56777	0.136364	0.0606936	2.24676	BnaC04G0582300ZS;BnaC04G0584100ZS;BnaA09G0152200ZS	0.145989	0.255481	cellular_component
GO:0004190	aspartic-type endopeptidase activity	1	19	443	51099	0.0526316	0.00866945	6.07093	BnaA05G0374500ZS	0.152502	0.18023	molecular_function
GO:0006508	proteolysis	1	22	393	51854	0.0454545	0.00757897	5.99746	BnaA05G0374500ZS	0.154144	0.204241	biological_process
GO:0009737	response to abscisic acid	2	22	1705	51854	0.0909091	0.0328808	2.76481	BnaC08G0241200ZS;BnaA05G0374500ZS	0.162265	0.209757	biological_process
GO:0048046	apoplast	2	22	1885	56777	0.0909091	0.0332001	2.73822	BnaA09G0152200ZS;BnaC03G0295200ZS	0.164757	0.276791	cellular_component
GO:0009705	plant-type vacuole membrane	1	22	516	56777	0.0454545	0.00908819	5.0015	BnaC08G0262500ZS	0.181999	0.284601	cellular_component
GO:0005887	integral component of plasma membrane	1	22	519	56777	0.0454545	0.00914103	4.97259	BnaC08G0262500ZS	0.182958	0.284601	cellular_component
GO:0009658	chloroplast organization	1	22	510	51854	0.0454545	0.00983531	4.62157	BnaC09G0446100ZS	0.195466	0.244318	biological_process
GO:0009617	response to bacterium	1	22	518	51854	0.0454545	0.00998959	4.55019	BnaC04G0582000ZS	0.19822	0.244318	biological_process
GO:0005773	vacuole	2	22	2176	56777	0.0909091	0.0383254	2.37203	BnaC08G0262500ZS;BnaA05G0332800ZS	0.205606	0.296058	cellular_component
GO:0005739	mitochondrion	3	22	4080	56777	0.136364	0.0718601	1.89763	BnaC03G0295100ZS;BnaA05G0375000ZS;BnaC09G0446000ZS	0.207454	0.296058	cellular_component
GO:0009570	chloroplast stroma	2	22	2217	56777	0.0909091	0.0390475	2.32817	BnaA05G0332300ZS;BnaC08G0241700ZS	0.21147	0.296058	cellular_component
GO:0016491	oxidoreductase activity	1	19	662	51099	0.0526316	0.0129552	4.06257	BnaA09G0152200ZS	0.219485	0.251763	molecular_function
GO:0006970	response to osmotic stress	1	22	658	51854	0.0454545	0.0126895	3.58207	BnaC08G0241200ZS	0.244981	0.29509	biological_process
GO:0009507	chloroplast	4	22	6601	56777	0.181818	0.116262	1.56387	BnaC03G0295100ZS;BnaA05G0332300ZS;BnaC08G0241700ZS;BnaC09G0446100ZS	0.248402	0.336545	cellular_component
GO:0048364	root development	1	22	684	51854	0.0454545	0.0131909	3.44591	BnaC09G0446000ZS	0.253373	0.298197	biological_process
GO:0045892	negative regulation of transcription, DNA-templated	1	22	701	51854	0.0454545	0.0135187	3.36234	BnaC09G0446000ZS	0.258812	0.298197	biological_process
GO:0009735	response to cytokinin	1	22	737	51854	0.0454545	0.014213	3.1981	BnaA05G0332300ZS	0.270206	0.304701	biological_process
GO:0009505	plant-type cell wall	1	22	865	56777	0.0454545	0.015235	2.98355	BnaC03G0295200ZS	0.286672	0.376256	cellular_component
GO:0009536	plastid	1	22	926	56777	0.0454545	0.0163094	2.78701	BnaC09G0446100ZS	0.303601	0.386402	cellular_component
GO:0006886	intracellular protein transport	1	22	875	51854	0.0454545	0.0168743	2.69371	BnaA05G0332800ZS	0.312353	0.344889	biological_process
GO:0005794	Golgi apparatus	2	22	3158	56777	0.0909091	0.0556211	1.63443	BnaC03G0295200ZS;BnaA05G0332800ZS	0.348174	0.430098	cellular_component
GO:0009793	embryo development ending in seed dormancy	1	22	1042	51854	0.0454545	0.0200949	2.262	BnaC09G0446100ZS	0.360252	0.38966	biological_process
GO:0009738	abscisic acid-activated signaling pathway	1	22	1071	51854	0.0454545	0.0206541	2.20075	BnaC08G0241200ZS	0.368238	0.390333	biological_process
GO:0006412	translation	1	22	1141	51854	0.0454545	0.0220041	2.06573	BnaC04G0584100ZS	0.387126	0.402307	biological_process
GO:0009535	chloroplast thylakoid membrane	1	22	1277	56777	0.0454545	0.0224915	2.02097	BnaC09G0446100ZS	0.393807	0.472568	cellular_component
GO:0071555	cell wall organization	1	22	1215	51854	0.0454545	0.0234312	1.93992	BnaA09G0152200ZS	0.406506	0.414323	biological_process
GO:0003735	structural constituent of ribosome	1	19	1390	51099	0.0526316	0.0272021	1.93484	BnaC04G0584100ZS	0.407908	0.454526	molecular_function
GO:0046686	response to cadmium ion	1	22	1367	51854	0.0454545	0.0263625	1.72421	BnaA05G0332300ZS	0.444495	0.444495	biological_process
GO:0016021	integral component of membrane	5	22	11850	56777	0.227273	0.208711	1.08893	BnaA02G0187300ZS;BnaA05G0332800ZS;BnaA09G0535400ZS;BnaC08G0241200ZS;BnaA02G0186600ZS	0.498171	0.581199	cellular_component
GO:0009941	chloroplast envelope	1	22	1829	56777	0.0454545	0.0322137	1.41103	BnaC09G0446100ZS	0.513493	0.582884	cellular_component
GO:0005730	nucleolus	1	22	1908	56777	0.0454545	0.0336052	1.35261	BnaC09G0446000ZS	0.528654	0.584302	cellular_component
GO:0003677	DNA binding	2	19	4844	51099	0.105263	0.0947964	1.11041	BnaC08G0261600ZS;BnaA05G0374500ZS	0.549417	0.595202	molecular_function
GO:0005576	extracellular region	1	22	2966	56777	0.0454545	0.0522395	0.870119	BnaC04G0582300ZS	0.692905	0.746206	cellular_component
GO:0016020	membrane	1	22	3764	56777	0.0454545	0.0662945	0.685646	BnaC04G0584100ZS	0.778949	0.817896	cellular_component
GO:0005737	cytoplasm	2	22	8599	56777	0.0909091	0.151452	0.60025	BnaC03G0295300ZS;BnaC04G0582000ZS	0.867179	0.88833	cellular_component
GO:0003700	DNA-binding transcription factor activity	1	19	5869	51099	0.0526316	0.114855	0.458242	BnaC08G0261600ZS	0.901581	0.950315	molecular_function
GO:0005634	nucleus	4	22	17586	56777	0.181818	0.309738	0.587006	BnaC09G0446000ZS;BnaC08G0261600ZS;BnaC08G0241700ZS;BnaC03G0295300ZS	0.943575	0.943575	cellular_component
GO:0005524	ATP binding	1	19	7262	51099	0.0526316	0.142116	0.370342	BnaA05G0332300ZS	0.945688	0.958568	molecular_function
GO:0046872	metal ion binding	1	19	7882	51099	0.0526316	0.15425	0.34121	BnaC08G0241500ZS	0.958568	0.958568	molecular_function

## Sheet: Table S8
Table S7: KEGG enrichment results of the candidate genes
Term_ID	Term_description	ListHit	ListTotal	PopHit	PopTotal	GeneRatio	BgRatio	Enrichment_score	GeneIds	p-value	FDR_bh
path:bna00440	Phosphonate and phosphinate metabolism	1	9	29	17993	0.111111	0.00161174	68.9387	BnaA05G0115800ZS	0.0144157	0.11088
path:bna00750	Vitamin B6 metabolism	1	9	47	17993	0.111111	0.00261213	42.5366	BnaC08G0241500ZS	0.0232701	0.11088
path:bna00261	Monobactam biosynthesis	1	9	48	17993	0.111111	0.0026677	41.6505	BnaA05G0332300ZS	0.02376	0.11088
path:bna00450	Selenocompound metabolism	1	9	79	17993	0.111111	0.0043906	25.3066	BnaA05G0332300ZS	0.0388369	0.135929
path:bna00920	Sulfur metabolism	1	9	145	17993	0.111111	0.00805869	13.7877	BnaA05G0332300ZS	0.0702488	0.177009
path:bna00220	Arginine biosynthesis	1	9	157	17993	0.111111	0.00872562	12.7339	BnaC03G0295100ZS	0.075861	0.177009
path:bna00330	Arginine and proline metabolism	1	9	262	17993	0.111111	0.0145612	7.63062	BnaC03G0295100ZS	0.123698	0.232744
path:bna00260	Glycine, serine and threonine metabolism	1	9	283	17993	0.111111	0.0157283	7.06439	BnaC08G0241700ZS	0.132996	0.232744
path:bna00564	Glycerophospholipid metabolism	1	9	378	17993	0.111111	0.0210082	5.28895	BnaA05G0115800ZS	0.173975	0.270628
path:bna00520	Amino sugar and nucleotide sugar metabolism	1	9	489	17993	0.111111	0.0271772	4.08839	BnaA09G0152200ZS	0.219668	0.305169
path:bna00230	Purine metabolism	1	9	572	17993	0.111111	0.0317901	3.49514	BnaA05G0332300ZS	0.252352	0.305169
path:bna00190	Oxidative phosphorylation	1	9	596	17993	0.111111	0.033124	3.3544	BnaA05G0375000ZS	0.261574	0.305169
path:bna03013	RNA transport	1	9	665	17993	0.111111	0.0369588	3.00635	BnaC09G0293200ZS	0.287524	0.309641
path:bna03010	Ribosome	1	9	1220	17993	0.111111	0.0678041	1.63871	BnaC04G0584100ZS	0.468502	0.468502

## Sheet: Table S9
Table S9: Correlation analyses between root-related traits across the three environments (WH17, WH19, and WH20)
Environment	Trait	PRL	DMR	RFW	RDW	TRL	TSA	TRV	TRN	TRL0.5	TSA0.5	TRV0.5	TRN0.5
WH17	PRL	1
	DMR	-0.158329	1
	RFW	0.270442	0.636472	1
	RDW	0.179135	0.668927	0.723516	1
	TRL	0.261287	0.311418	0.512207	0.435303	1
	TSA	0.325716	0.476166	0.717547	0.634683	0.917778	1
	TRV	0.266579	0.60382	0.790932	0.737493	0.441083	0.746398	1
	TRN	0.229431	0.32942	0.495303	0.442029	0.962711	0.871564	0.41181	1
	TRL0.5	0.296945	0.359604	0.583913	0.474538	0.86265	0.92664	0.648439	0.772005	1
	TSA0.5	0.338414	0.521623	0.752953	0.709258	0.751303	0.935912	0.869433	0.70542	0.891981	1
	TRV0.5	0.258266	0.701835	0.831464	0.852766	0.547234	0.76534	0.862	0.561361	0.574082	0.830272	1
	TRN0.5	0.0376442	0.338927	0.42807	0.278885	0.446257	0.541917	0.453016	0.381253	0.649074	0.566159	0.345523	1
WH19	Trait	PRL	DMR	RFW	TRL	TSA	TRV	TRN	TRL0.5	TSA0.5	TRV0.5	TRN0.5
	PRL	1
	DMR	0.0372545	1
	RFW	0.280597	0.784307	1
	TRL	0.233978	0.113699	0.262425	1
	TSA	0.351434	0.3859	0.593153	0.860536	1
	TRV	0.124764	0.547568	0.666139	-0.200739	0.223179	1
	TRN	0.174057	0.0907319	0.176226	0.761673	0.648381	-0.150933	1
	TRL0.5	0.35263	0.203315	0.382249	0.873894	0.92814	0.0188076	0.600007	1
	TSA0.5	0.410909	0.347313	0.581472	0.672216	0.879427	0.277192	0.440855	0.891084	1
	TRV0.5	0.312778	0.643813	0.839973	0.33955	0.681126	0.602734	0.200294	0.525277	0.791744	1
	TRN0.5	0.217243	0.290633	0.417028	0.445516	0.652524	0.299068	0.504199	0.648734	0.673976	0.517522	1
WH20	Trait	PRL	DMR	RFW	TRL	TSA	TRV	TRN	TRL0.5	TSA0.5	TRV0.5	TRN0.5
	PRL	1
	DMR	0.0409496	1
	RFW	0.33079	0.778802	1
	TRL	0.24477	0.193576	0.336781	1
	TSA	0.366338	0.446296	0.691528	0.801109	1
	TRV	0.160428	0.530047	0.641282	-0.0729047	0.467491	1
	TRN	0.129611	0.184074	0.259379	0.872273	0.604553	-0.114901	1
	TRL0.5	0.35566	0.219661	0.425437	0.773264	0.876947	0.205869	0.503292	1
	TSA0.5	0.448984	0.410862	0.668051	0.627752	0.916634	0.5268	0.440835	0.869214	1
	TRV0.5	0.308951	0.666122	0.845118	0.386801	0.753748	0.720938	0.361916	0.472508	0.793696	1
	TRN0.5	0.251538	0.242398	0.374763	0.7039	0.75571	0.227689	0.566701	0.72934	0.696596	0.457066	1
